# Supplementary material for: A chromosome-level genome assembly and annotation of the desert horned lizard, Phrynosoma platyrhinos, provides insight into chromosomal rearrangements among reptiles
Source: PubMed Central journal article supplement (PMC8848323; doi:10.1093/gigascience/giab098), 2022-02-04

# GigaScience

## A chromosome-level genome assembly and annotation of the Desert Horned Lizard, *Phrynosoma platyrhinos*, provides insight into chromosomal rearrangements among reptiles

--Manuscript Draft--

|                                                      |                                                                                                                                                                                                                                                                                                                                                                                                                                                                                                                                                                                                                                                                                                                                                                                                                                                                                                                                                                                                                                                                                                                                                                                                                                                                                                                                                                                                                                                                                                                                                                                                                                                                                                                                                                                                                                                                                                                                                                                              |                   |
|------------------------------------------------------|----------------------------------------------------------------------------------------------------------------------------------------------------------------------------------------------------------------------------------------------------------------------------------------------------------------------------------------------------------------------------------------------------------------------------------------------------------------------------------------------------------------------------------------------------------------------------------------------------------------------------------------------------------------------------------------------------------------------------------------------------------------------------------------------------------------------------------------------------------------------------------------------------------------------------------------------------------------------------------------------------------------------------------------------------------------------------------------------------------------------------------------------------------------------------------------------------------------------------------------------------------------------------------------------------------------------------------------------------------------------------------------------------------------------------------------------------------------------------------------------------------------------------------------------------------------------------------------------------------------------------------------------------------------------------------------------------------------------------------------------------------------------------------------------------------------------------------------------------------------------------------------------------------------------------------------------------------------------------------------------|-------------------|
| <b>Manuscript Number:</b>                            | GIGA-D-21-00044                                                                                                                                                                                                                                                                                                                                                                                                                                                                                                                                                                                                                                                                                                                                                                                                                                                                                                                                                                                                                                                                                                                                                                                                                                                                                                                                                                                                                                                                                                                                                                                                                                                                                                                                                                                                                                                                                                                                                                              |                   |
| <b>Full Title:</b>                                   | A chromosome-level genome assembly and annotation of the Desert Horned Lizard, <i>Phrynosoma platyrhinos</i> , provides insight into chromosomal rearrangements among reptiles                                                                                                                                                                                                                                                                                                                                                                                                                                                                                                                                                                                                                                                                                                                                                                                                                                                                                                                                                                                                                                                                                                                                                                                                                                                                                                                                                                                                                                                                                                                                                                                                                                                                                                                                                                                                               |                   |
| <b>Article Type:</b>                                 | Research                                                                                                                                                                                                                                                                                                                                                                                                                                                                                                                                                                                                                                                                                                                                                                                                                                                                                                                                                                                                                                                                                                                                                                                                                                                                                                                                                                                                                                                                                                                                                                                                                                                                                                                                                                                                                                                                                                                                                                                     |                   |
| <b>Funding Information:</b>                          | Miami University                                                                                                                                                                                                                                                                                                                                                                                                                                                                                                                                                                                                                                                                                                                                                                                                                                                                                                                                                                                                                                                                                                                                                                                                                                                                                                                                                                                                                                                                                                                                                                                                                                                                                                                                                                                                                                                                                                                                                                             | Dr Tereza Jezkova |
| <b>Abstract:</b>                                     | <p><b>Background.</b> The increasing number of chromosome-level genome assemblies has advanced our knowledge and understanding of macroevolutionary processes. Herein, we introduce the genome of the Desert Horned Lizard, <i>Phrynosoma platyrhinos</i>, an iguanid lizard occupying extreme desert conditions of the American Southwest. We conduct analysis of the chromosomal structure and composition of this species and compare these features across genomes of 12 other reptiles (5 species of lizards, 3 snakes, 3 turtles, and 1 bird).</p> <p><b>Findings.</b> The Desert Horned Lizard genome was sequenced using Illumina short paired-end reads, assembled, and scaffolded using Dovetail Genomics Hi-C and Chicago long-range contact data. The resulting genome assembly had a total length of 1,901.85 Mb, scaffold N50 length of 273.213 Mb, and included 5,294 scaffolds. Our chromosome-level assembly includes 6 macrochromosomes and 11 microchromosomes, with a total of 20,764 annotated genes. GC content and gene density were higher across microchromosomes than macrochromosomes, while repeat element distributions showed the opposite trend. Gene ontology analyses indicated that microchromosome and macrochromosome gene content differs significantly in at least six molecular functions. Synteny analysis indicated that large microchromosome blocks are conserved among closely related species, whereas macrochromosomes show evidence of more frequent fusion and fission events, even between closely related species.</p> <p><b>Conclusions:</b> Our analyses provide new evidence for distinct gene content and chromosomal structure in microchromosomes versus macrochromosomes within reptiles. Our results also demonstrate significant karyotypic evolution across Reptilia, with frequent splits, fusions, and rearrangements that have resulted in shuffling of chromosomal blocks between macrochromosomes and microchromosomes.</p> |                   |
| <b>Corresponding Author:</b>                         | Nazila Koochekian, M.S.<br>Miami University College of Arts and Science<br>Oxford, OH UNITED STATES                                                                                                                                                                                                                                                                                                                                                                                                                                                                                                                                                                                                                                                                                                                                                                                                                                                                                                                                                                                                                                                                                                                                                                                                                                                                                                                                                                                                                                                                                                                                                                                                                                                                                                                                                                                                                                                                                          |                   |
| <b>Corresponding Author Secondary Information:</b>   |                                                                                                                                                                                                                                                                                                                                                                                                                                                                                                                                                                                                                                                                                                                                                                                                                                                                                                                                                                                                                                                                                                                                                                                                                                                                                                                                                                                                                                                                                                                                                                                                                                                                                                                                                                                                                                                                                                                                                                                              |                   |
| <b>Corresponding Author's Institution:</b>           | Miami University College of Arts and Science                                                                                                                                                                                                                                                                                                                                                                                                                                                                                                                                                                                                                                                                                                                                                                                                                                                                                                                                                                                                                                                                                                                                                                                                                                                                                                                                                                                                                                                                                                                                                                                                                                                                                                                                                                                                                                                                                                                                                 |                   |
| <b>Corresponding Author's Secondary Institution:</b> |                                                                                                                                                                                                                                                                                                                                                                                                                                                                                                                                                                                                                                                                                                                                                                                                                                                                                                                                                                                                                                                                                                                                                                                                                                                                                                                                                                                                                                                                                                                                                                                                                                                                                                                                                                                                                                                                                                                                                                                              |                   |
| <b>First Author:</b>                                 | Nazila Koochekian, M.S.                                                                                                                                                                                                                                                                                                                                                                                                                                                                                                                                                                                                                                                                                                                                                                                                                                                                                                                                                                                                                                                                                                                                                                                                                                                                                                                                                                                                                                                                                                                                                                                                                                                                                                                                                                                                                                                                                                                                                                      |                   |
| <b>First Author Secondary Information:</b>           |                                                                                                                                                                                                                                                                                                                                                                                                                                                                                                                                                                                                                                                                                                                                                                                                                                                                                                                                                                                                                                                                                                                                                                                                                                                                                                                                                                                                                                                                                                                                                                                                                                                                                                                                                                                                                                                                                                                                                                                              |                   |
| <b>Order of Authors:</b>                             | Nazila Koochekian, M.S.<br>Alfredo Ascanio<br>Keaka Farleigh<br>Daren c card                                                                                                                                                                                                                                                                                                                                                                                                                                                                                                                                                                                                                                                                                                                                                                                                                                                                                                                                                                                                                                                                                                                                                                                                                                                                                                                                                                                                                                                                                                                                                                                                                                                                                                                                                                                                                                                                                                                 |                   |

|                                                                                                                                                                                                                                                                                                                                                                                                                                                                                                                                     |                 |
|-------------------------------------------------------------------------------------------------------------------------------------------------------------------------------------------------------------------------------------------------------------------------------------------------------------------------------------------------------------------------------------------------------------------------------------------------------------------------------------------------------------------------------------|-----------------|
|                                                                                                                                                                                                                                                                                                                                                                                                                                                                                                                                     | Drew R Schield  |
|                                                                                                                                                                                                                                                                                                                                                                                                                                                                                                                                     | Todd A Castoe   |
|                                                                                                                                                                                                                                                                                                                                                                                                                                                                                                                                     | Tereza Jezkova  |
| <b>Order of Authors Secondary Information:</b>                                                                                                                                                                                                                                                                                                                                                                                                                                                                                      |                 |
| <b>Additional Information:</b>                                                                                                                                                                                                                                                                                                                                                                                                                                                                                                      |                 |
| <b>Question</b>                                                                                                                                                                                                                                                                                                                                                                                                                                                                                                                     | <b>Response</b> |
| Are you submitting this manuscript to a special series or article collection?                                                                                                                                                                                                                                                                                                                                                                                                                                                       | No              |
| <p><b>Experimental design and statistics</b></p> <p>Full details of the experimental design and statistical methods used should be given in the Methods section, as detailed in our <a href="#">Minimum Standards Reporting Checklist</a>. Information essential to interpreting the data presented should be made available in the figure legends.</p> <p>Have you included all the information requested in your manuscript?</p>                                                                                                  | Yes             |
| <p><b>Resources</b></p> <p>A description of all resources used, including antibodies, cell lines, animals and software tools, with enough information to allow them to be uniquely identified, should be included in the Methods section. Authors are strongly encouraged to cite <a href="#">Research Resource Identifiers</a> (RRIDs) for antibodies, model organisms and tools, where possible.</p> <p>Have you included the information requested as detailed in our <a href="#">Minimum Standards Reporting Checklist</a>?</p> | Yes             |
| <p><b>Availability of data and materials</b></p> <p>All datasets and code on which the conclusions of the paper rely must be either included in your submission or deposited in <a href="#">publicly available repositories</a> (where available and ethically</p>                                                                                                                                                                                                                                                                  | Yes             |

appropriate), referencing such data using a unique identifier in the references and in the “Availability of Data and Materials” section of your manuscript.

Have you have met the above requirement as detailed in our [Minimum Standards Reporting Checklist](#)?

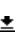

1 **A chromosome-level genome assembly and annotation of the Desert Horned**  
2 **Lizard, *Phrynosoma platyrhinos*, provides insight into chromosomal**  
3 **rearrangements among reptiles**

4

5 Running title: genome of *P. platyrhinos*

6 Nazila Koochekian (\*Correspondence): Department of Biology, Miami University, Oxford, OH,  
7 45056, USA. Email: koochen@miamioh.edu

8 Alfredo Ascanio: Department of Biology, Miami University, Oxford, OH, 45056, USA. Email:  
9 ascaniaa@miamioh.edu

10 Keaka Farleigh: Department of Biology, Miami University, Oxford, OH, 45056, USA. Email:  
11 farleik@miamioh.edu

12 Daren C. Card: Department of Organismic & Evolutionary Biology, Harvard University,  
13 Cambridge, MA, 02138, USA, and Museum of Comparative Zoology, Harvard University,  
14 Cambridge, MA, 02138, USA. Email: dcard@fas.harvard.edu

15 Drew R. Schield: Department of Ecology and Evolutionary Biology, University of Colorado,  
16 Boulder, CO, 80309, USA. Email: Drew.Schild@colorado.edu

17 Todd A. Castoe: Department of Biology, University of Texas at Arlington, Arlington, TX, 76019,  
18 USA. Email: todd.castoe@uta.edu

19 Tereza Jezkova: Department of Biology, Miami University, Oxford, OH, 45056, USA. Email:  
20 jezkovt@miamioh.edu

21

22

23

24

## 25 Abstract

26 *Background.* The increasing number of chromosome-level genome assemblies has advanced  
27 our knowledge and understanding of macroevolutionary processes. Herein, we introduce the  
28 genome of the Desert Horned Lizard, *Phrynosoma platyrhinos*, an iguanid lizard occupying  
29 extreme desert conditions of the American Southwest. We conduct analysis of the chromosomal  
30 structure and composition of this species and compare these features across genomes of 12  
31 other reptiles (5 species of lizards, 3 snakes, 3 turtles, and 1 bird).

32 *Findings.* The Desert Horned Lizard genome was sequenced using Illumina short paired-end  
33 reads, assembled, and scaffolded using Dovetail Genomics Hi-C and Chicago long-range  
34 contact data. The resulting genome assembly had a total length of 1,901.85 Mb, scaffold N50  
35 length of 273.213 Mb, and included 5,294 scaffolds. Our chromosome-level assembly includes  
36 6 macrochromosomes and 11 microchromosomes, with a total of 20,764 annotated genes. GC  
37 content and gene density were higher across microchromosomes than macrochromosomes,  
38 while repeat element distributions showed the opposite trend. Gene ontology analyses indicated  
39 that microchromosome and macrochromosome gene content differs significantly in at least six  
40 molecular functions. Synteny analysis indicated that large microchromosome blocks are  
41 conserved among closely related species, whereas macrochromosomes show evidence of more  
42 frequent fusion and fission events, even between closely related species.

43 *Conclusions:* Our analyses provide new evidence for distinct gene content and chromosomal  
44 structure in microchromosomes versus macrochromosomes within reptiles. Our results also  
45 demonstrate significant karyotypic evolution across Reptilia, with frequent splits, fusions, and  
46 rearrangements that have resulted in shuffling of chromosomal blocks between  
47 macrochromosomes and microchromosomes.

48

49 **Key words:** microchromosome; macrochromosome; gene content; synteny; Reptilia

## 50 Background

51 The increasing number of available chromosome-level genome assemblies of non-traditional  
52 model organisms has advanced our understanding of genome evolution over large time scales,  
53 including intra- and inter-chromosomal rearrangements and karyotype evolution. Reptiles  
54 (herein defined as the clade of Sauropsida) exhibit particularly high levels of karyotypic variation  
55 (Fig. 1)[1, 2]. Much of this karyotypic variation is apparently due to frequent merging, splitting,  
56 and rearrangements events among chromosomes, resulting in varying numbers and sizes of  
57 chromosomes even among closely related taxa. Reptilian karyotypic variation is especially  
58 notable with regard to variation in the size and number of microchromosomes (Fig. 1), with  
59 microchromosomes having an average length of only 12 Mb in comparison with  
60 macrochromosomes that range from 40 to 250 Mb [3]. The presence of microchromosomes  
61 span 400–450 million years of evolutionary history, are present in many ancient chordates, fish,  
62 and amphibians, and are universally present in all reptiles, except crocodiles [4]. Interestingly,  
63 microchromosomes are absent from mammalian genomes and microchromosome organization  
64 in avian species is relatively conserved at a karyotypic level, except for occasional fusion to  
65 other chromosomes in some species [5]. In contrast, microchromosomes of non-avian reptiles  
66 are variable in number and size [6], potentially due to relatively high recombination rates [7] that  
67 lead to higher rates of chromosomal rearrangement [4,8]. Despite being a promising system in  
68 which to study karyotypic evolution, relatively little is known about the genomic features of  
69 macrochromosomes and microchromosomes and how these features evolve across Reptilia [9].  
70 Moreover, microchromosomes are structurally and functionally distinct from  
71 macrochromosomes [10] that makes them interesting to study. Despite interest in the patterns  
72 and processes underlying chromosome evolution in reptiles, there have remained relatively few  
73 high-quality reptile genomes available to study these questions. Specifically for lizards, only four  
74 genomes are annotated and assembled at the level of chromosomes: the Green Anole, *Anolis*

75 *carolinensis* [11] (with 6 chromosomes and 7 microchromosomal linkage groups), the Viviparous  
76 Lizard, *Zootoca vivipara* [12](19 linkage groups), the Sand Lizard, *Lacerta agilis* [13](18  
77 chromosomes and WZ sex chromosome), and the Common Wall Lizard, *Podarcis muralis*  
78 [14](18 chromosomes and a Z sex chromosome). There is also a fifth, nearly chromosome level  
79 genome assembly for the Argentine Black and White Tegu, *Salvator merianae* [15] (assembled  
80 to 4,512 scaffolds).

81 Here we present a new chromosome-level genome assembly of the Desert Horned Lizard (*P.*  
82 *platyrhinos*). This species is widely distributed across the southwestern deserts of North  
83 America, including some of the hottest and driest places on Earth (e.g. Death Valley in the  
84 Mojave Desert; [16]). We have annotated the genome and assessed large-scale structure and  
85 composition of the genome across macrochromosomes and microchromosomes. Using this  
86 new resource, we conduct synteny analyses to explore major changes in genome organization  
87 by comparing it with existing chromosome-level annotated genomes of other lizards (*A.*  
88 *carolinensis*, *S. merianae*, *L. agilis*, *Z. vivipara* and *P. muralis*), snakes (*Crotalus viridis* [17],  
89 *Thamnophis elegans* [18], and *Naja naja* [19]), a bird (*Gallus gallus* [20]), and turtles  
90 (*Trachemys scripta* [21], *Gopherus evgoodei* [22], and *Dermochelys coriacea* [23]). Our findings  
91 reveal differences in structure and gene content of macrochromosomes and microchromosomes  
92 and highlight numerous chromosomal rearrangements among reptilian lineages.

## 93 Analysis

### 94 **Genome assembly and chromosome identification**

95 The whole genome of *P. platyrhinos* was sequenced at 21,053.74-fold physical coverage using  
96 the Dovetail Genomics HiRise sequencing and assembly approach [24] that combines 150 bp  
97 paired-end reads from Chicago and Hi-C data (Table 1). The final assembly included 17  
98 scaffolds comprising 99.56% of the genome assembly. Seven large scaffolds were assigned to

99 macrochromosomes 1-6 (with two scaffolds representing arms of chromosome 3). Ten smaller  
100 scaffolds were assigned to microchromosomes 1-11 (one scaffold was split into two  
101 microchromosomes) based on their size (Table 2). Since sex chromosomes are conserved  
102 across iguanas [25], microchromosome 9 was identified as the sex chromosome based on the  
103 homology with sex chromosome in *A. carolinensis*. Also, three X-linked genes in *A. carolinensis*  
104 (*ATP2A2*, *FZD10*, and *TMEM132D* [25]; Table S1) were identified on microchromosome 9 in *P.*  
105 *platyrhinos*.

### 106 **Genome annotation and chromosomal composition**

107 We annotated 20,764 protein-coding genes in the *P. platyrhinos* genome assembly. Overall,  
108 gene density (GD) and GC-content tended to be lower on *P. platyrhinos* macrochromosomes  
109 (mean = 0.18, and standard deviation = 0.14 for GD; mean = 0.36, and standard deviation =  
110 0.12 for GC) and higher on microchromosomes (mean = 0.27, and standard deviation = 0.16 for  
111 GD; mean = 0.39, and standard deviation = 0.028 for GC; Fig. 2). The annotation of repeat  
112 elements identified 44.45% of the genome repetitive content (Table S2), and the density of  
113 repeat elements tended to be higher on macrochromosomes (mean = 0.45, and standard  
114 deviation = 0.056) than on microchromosomes (mean = 0.39, and standard deviation = 0.01;  
115 Fig. 2). The highest repeat content was found in Simple sequence repeats (6.90%), L2/CR1/Rex  
116 (6.88%), hobo-Activator (5.98%), and Tourist/Harbinger (4.90%) families (Table S2).

### 117 **Gene ontology**

118 To assess whether macrochromosomes and microchromosomes contain distinct functional  
119 classes of genes, we investigated the distribution of gene functional classes across  
120 chromosomes. From 8,634 genes on macrochromosomes and 2,251 genes on  
121 microchromosomes, PANTHER [26] annotated 5,323 molecular function hits on  
122 macrochromosomes and 1,379 on microchromosomes using a protein families/subfamilies



123 library. These were classified into eight “level 1” molecular functions, at least one of 42 “level 2”,  
124 and 142 “level 3” categories (Table S3). Binding and catalytic activity together accounted for  
125 more than 70% of the molecular functions of both macrochromosomal and microchromosomal  
126 genes, while translation regulator activity, structural molecule activity, and molecular transducer  
127 activity accounted for less than 10% of the total molecular function hits (Table S3). For “level 1”  
128 and “level 2” GO categories, the relative fraction of genes in particular categories were not  
129 significantly different between macro- and microchromosomes. For “level 3” GO categories, we  
130 identified significant differences between macrochromosomes and microchromosomes in  
131 functional categories including transcription coactivator activity, transcription corepressor  
132 activity, integrin binding, phosphatase inhibitor activity, histone deacetylase activity, and organic  
133 acid transmembrane transporter activity (Table S3). Interestingly, the frequency of genes with  
134 transcription coactivator activity was higher on macrochromosomes while the opposite function,  
135 transcription corepressor activity was higher on microchromosomes. Additionally, genes  
136 associated with the function ‘histone deacetylase activity as an enzymatic function in gene  
137 regulation at the transcriptional level’ [27] were more highly represented on microchromosomes,  
138 as were genes with phosphatase inhibitor activity.

### 139 **Synteny analysis**

140 To investigate how reptilian genome structure and content has been impacted by chromosomal  
141 rearrangements through evolutionary time, we conducted detailed analyses of synteny between  
142 *P. platyrhinos* genome and those of 12 species of reptiles for which chromosome-level genome  
143 assemblies were available. These results showed *A. carolinensis*, the closest relative to *P.*  
144 *platyrhinos*, has the same macrochromosome arrangement but microchromosomes in *S.*  
145 *merianae* have more similarity in arrangement to *P. platyrhinos* microchromosomes (Figs. 3-5;  
146 Table S4).

147 Based on our synteny inferences across species (Fig. 3), we applied dominance analysis [28],  
148 more commonly used in ecological community assessments, to quantitatively assess the degree  
149 to which syntenic blocks from each chromosome of *P. platyrhinos* are dispersed across  
150 chromosomes of the other species (Fig. 4). This dispersion was measured using the Simpson's  
151 Dominance Index reciprocal, which we can call an "effective number of target chromosomes"  
152 into which the homologies of a *P. platyrhinos* chromosome appear. This index ranges from 1 to  
153  $m$ , where  $m$  is the number of chromosomes of the target species being compared to *P.*  
154 *platyrhinos*. A value of 1 represents high dominance, which in this context indicates that  
155 syntenic blocks from a chromosome of *P. platyrhinos* are restricted to a single chromosome of  
156 another species. A value of  $m$  would mean all chromosomes of the target species contain an  
157 even proportion of *P. platyrhinos* syntenic blocks. If a large syntenic block is retained in one  
158 chromosome while a few proportionally small syntenic blocks are distributed across other target  
159 chromosomes, our dominance value will tend to 1.

160 As expected, our results from chromosomal synteny dominance analysis show that *P.*  
161 *platyrhinos* macro- and microchromosomes have lower degrees of chromosomal rearrangement  
162 when compared to closely related species (1 to 3 effective chromosomes; Fig. 4). For example,  
163 *A. carolinensis* is the closest relative to *P. platyrhinos* (both species belong to the family  
164 Iguanidae) and has the highest synteny with *P. platyrhinos*, *S. meriana* has the second highest  
165 synteny with *P. platyrhinos* with 8 (out of 10) identical microchromosomes and identical  
166 macrochromosomes, with the exception of chromosome 6 which is split into two  
167 microchromosomes in *S. meriana*. Snake chromosomes also have high synteny with those of  
168 *P. platyrhinos*, but a noticeable distinction between macro- and microchromosomes becomes  
169 evident. For macrochromosomes' synteny, breaks and fusions into other chromosomes (macro  
170 and micro) are apparent in comparisons between snake and lizard genomes, indicative of  
171 dispersion of these homologies through the genome. However, for microchromosomes' synteny,  
172 in particular with the snakes *N. naja* and *T. elegans*, they appear to be constrained or poorly

173 dispersed through the genome, in comparison to macrochromosomes. This constrain on  
174 microchromosomes' synteny is noticeable even when one or multiple microchromosomes  
175 appear fused to others in the target species syntenies. At greater phylogenetic distances, the  
176 breakdown of chromosomal synteny and homology from lizards to other reptilian lineages  
177 becomes more apparent, showing greater rearrangements and partitions of syntenic blocks in  
178 macrochromosomes than in microchromosomes (Fig. 3). This is shown clearly by the  
179 dominance analyses, in which the macrochromosomes of *P. platyrhinos* are dispersed across a  
180 higher number of effective chromosomes in more distantly related species such as turtles or  
181 chicken (Fig. 4). Conversely, microchromosomes of *P. platyrhinos* typically remain in single  
182 homologous blocks, as the effective number of chromosomes is close to 1 for all but  
183 microchromosome 6. Overall, macrochromosomes tend to have a higher degree of dispersion  
184 across different chromosomes in other species than microchromosomes (eg.  $Ma_1 = 2.38 \pm 0.96$ ;  
185  $mi_1 = 1.45 \pm 0.45$ ; Fig. 4), with the exception of macrochromosome 6 ( $Ma_6 = 1.44 \pm 0.27$ ).

## 186 Discussion

187 The chromosome-level assembly and annotation of the *P. platyrhinos* genome is only the  
188 second of its kind in the family Iguanidae (after *A. carolinensis*) and contributes a new valuable  
189 resource for chromosome-level comparative genomics in reptiles. The higher contiguity of the  
190 genome assembly for microchromosomes in *P. platyrhinos* relative to that of *A. carolinensis*  
191 enables some of the first comparisons of chromosomal evolution in lizards that incorporates  
192 patterns distinct to macro- versus microchromosomes. Our results highlight distinct functional  
193 classes of gene content, chromosomal structure, and rearrangement patterns in  
194 microchromosomes compared to macrochromosomes. Our synteny analyses illustrate that  
195 chromosomes in reptiles have undergone a number of substantial splits, fusions, and  
196 rearrangements, often resulting in syntenic blocks shifting between macrochromosomes and  
197 microchromosomes. This ancestral pattern of chromatin shifting between macro- and

198 microchromosomes likely explains some unusual patterns of gene density, GC-content, and  
199 repeat elements, such as blocks of high gene density on macrochromosome that may represent  
200 ancestral fragments derived from microchromosomes. We also find evidence that gene content  
201 on microchromosomes and macrochromosomes differs in multiple functional ways, adding a  
202 new layer of functional differentiation that distinguish these types of chromosomes to recent  
203 accumulating evidence for their structural and functional distinction [10, 21].  
204 Consistent with previous studies of reptilian chromosome composition [6,7,30], we find that in *P.*  
205 *platyrhinos*, GC content, gene density, and repeat element density differ between  
206 macrochromosomes and microchromosomes, with gene density and GC content being higher  
207 on microchromosomes and repeat elements being more densely distributed on  
208 macrochromosomes. Patterns of high gene density on microchromosomes have been  
209 hypothesized to be an evolutionary solution to reduce overall DNA mass and increase  
210 recombination rate, predominantly by reducing repeat element content [4]. High recombination  
211 rates further increase GC content due to GC-biased gene conversion (gBGC) [31], leading to a  
212 higher frequency of GC bases on microchromosomes that can represent functionally different  
213 gene content [10]. While gene and repeat element density are highly variable along  
214 chromosomes, GC content is known to be higher at subtelomeric regions [32], a pattern we also  
215 observed in the *P. platyrhinos* genome (Fig. 2). Interestingly, and in contrast to this broad  
216 pattern, in some chromosomes (e.g., microchromosome 6), there are regions of high GC  
217 content dispersed throughout the chromosome. This may be indicative of recent chromosomal  
218 rearrangements and/or translocations. This hypothesis is supported by our synteny analyses  
219 that suggest that microchromosome 6 of *P. platyrhinos* comprises two microchromosomes in *S.*  
220 *merianae*, *G. gallus*, and the two turtle species. Similarly, *P. platyrhinos* chromosome 6 has high  
221 GC content and gene density relative to other macrochromosomes. Chromosome 6 of *P.*  
222 *platyrhinos* is syntenic with a macrochromosome and a microchromosome in *S. merianae*, and  
223 the high gene density on one end of this chromosome (extending for ~40 Mbp; Fig. 2) supports

224 the scenario that a microchromosomal region with higher gene and GC density was recently  
225 translocated to a macrochromosome in the ancestor of *P. platyrhinos*. Broadly, these findings  
226 suggest that ancestral chromosomal translocations and fissions may have resulted in regions of  
227 reptilian genomes that have not yet reached mutational and compositional equilibria that are  
228 otherwise characteristic of macro- and microchromosomal regions.

229 Our analyses of synteny across reptilian genomes revealed that splitting, fusion, and  
230 rearrangement events among chromosomes are common and have occurred frequently and  
231 repeatedly throughout reptile evolution. This process has resulted in varying numbers and sizes  
232 of macro- and microchromosomes, even among closely related species (e.g., *P. platyrhinos*  
233 versus *A. carolinensis*, and *C. viridis* versus *T. elegans*). Furthermore, rearrangements and  
234 fusions appear to often occur between macro- and microchromosomes, including examples of  
235 macro and microchromosomes fusing together to form a single macrochromosome (e.g.,  
236 several *P. platyrhinos* microchromosome form a macrochromosome in *L. agilis*, *Z. vivipara*, and  
237 *P. muralis*). Overall, however, syntenic blocks on macrochromosomes appear to have  
238 experienced a greater degree of fusion, splitting, and translocation than those from  
239 microchromosomes.

240 Among reptiles, microchromosomes show substantial variation in both number and size among  
241 lineages (Fig. 3). Some individual microchromosomes of *P. platyrhinos* appear to be fused in  
242 other lineages to form large microchromosomes or macrochromosomes, and portions of *P.*  
243 *platyrhinos* microchromosomes can be found dispersed across macrochromosomes of other  
244 species. We also observed evidence for a large-scale rearrangement of syntenic blocks  
245 between micro- and macrochromosomes in Lacertid lizards, based on evidence that while some  
246 lacertids (*S. merianae*) show high synteny with *P. platyrhinos*, other lacertid lizards (*L. agilis*, *Z.*  
247 *vivipara*, and *P. muralis*) show evidence of macrochromosomal blocks from *P. platyrhinos*  
248 comprising a substantial portion of microchromosomes, and vice-versa. For example,

249 macrochromosome 8 in *L. agilis* and *P. muralis*, and chromosome 6 in *Z. vivipara* are almost  
250 completely comprised of blocks from microchromosomes in *P. platyrhinos* and *S. merianae*.  
251 Macrochromosome synteny appears more highly conserved between *P. platyrhinos* and its  
252 closest relative, *A. carolinensis*, and between *P. platyrhinos* and *S. merianae*. Snakes as well as  
253 the three lizards in the family Lacertidae generally possess a greater number of smaller  
254 macrochromosomes than *P. platyrhinos*, whereas *P. platyrhinos*'s macrochromosomes are  
255 often syntenic with two different macrochromosomes in snakes and Lacertids. At greater levels  
256 of divergence, the macrochromosome organization in turtles is quite distinct from that of lizards  
257 and snakes, indicating that a number of fusion/fission events have occurred deep in the  
258 ancestral lineages of reptiles.

259 Our analyses further suggest that the gene content of microchromosomes versus  
260 macrochromosomes may be distinct in key functional aspects, including a greater prevalence of  
261 genes that play activating or positive regulatory roles being concentrated on  
262 macrochromosomes, versus genes with repressive or negative regulatory roles being  
263 concentrated on microchromosomes. Genes contained on microchromosomes are enriched for  
264 higher transcription corepressor, phosphatase inhibitor, and histone deacetylase functions.  
265 These and other signatures of differences in gene function across major chromosome classes  
266 (e.g., macrochromosomes having greater density of integrin binding and organic acid  
267 transmembrane transporter activity) suggest that further work to explore the mechanistic and  
268 evolutionary underpinnings of such biases may provide new insight into the relationships  
269 between genome structure and function, and the genomic location of functional classes of  
270 genes. These inferences, together with other emerging evidence for the compositional and  
271 functional distinctiveness between micro- and macrochromosomes [7,10,29] suggests that there  
272 may be key functional, evolutionary, and mechanistic features that distinguish these  
273 chromosome classes that explain the significance of the presence, absence, and variable  
274 abundance of microchromosomes across eukaryote lineages.

## 275 Methods

### 276 ***Genome and transcriptome assembly***

277 We sequenced and assembled the reference genome from a female Desert Horned Lizard  
278 collected in Dry Lake Valley, Nevada (NCBI accession SAMN17187150). This specimen was  
279 collected and euthanized according to Miami University Institutional Animal Care and Use  
280 Committee protocol 992\_2021\_Apr. Liver tissue was snap frozen in liquid nitrogen and sent to  
281 Dovetail Genomics (Chicago, IL) for construction of Chicago and Dovetail Hi-C libraries used for  
282 sequencing on Illumina platform (Table 3). Read data were used for *de novo* genome assembly  
283 (NCBI accession PRJNA685451) by HiRise™ scaffolding pipeline (Table 1).

284 Transcriptomic libraries were sequenced from 8 tissues (liver, lungs, brain, muscle, testes,  
285 heart, eyes, and kidneys) from a male lizard collected at the same locality as the genome  
286 animal (Table 4). For each library, total RNA was extracted using Trizol reagent, and RNAseq  
287 libraries were individually prepared and sequenced by Novogene Corporation Inc using an  
288 Illumina HiSeq and 150 bp paired-end reads. We used Trinity r2014 0413p1 to assemble  
289 transcriptome reads from all tissues (using min\_kmer\_cov:1 and default settings). The assembly  
290 contained 199,541 transcripts comprising 199,500 Trinity-annotated genes, with an average  
291 length of 1438 base pairs and an N50 length of 2420 bp.

### 292 ***Chromosome identification***

293 According to the phrynosomatid karyotype [33], 6 pairs of macrochromosomes and 11 pairs of  
294 microchromosomes (one pair sex-microchromosome) were expected to be identified for *P.*  
295 *platyrhinos*. Assigning scaffolds to specific chromosomes was done using chromosome gene  
296 markers from other close species (*A. carolinensis*, *Leiolepis reevesii*) (Table S1). Best BLAST  
297 with chromosome-linked markers in lizards [34] downloaded from NCBI was used to identify the

298 genomic location of each gene marker. The markers for macrochromosomes in lizards linked to  
299 7 largest scaffolds (2 scaffolds for chromosome 3), which we sorted by size and named  
300 macrochromosomes 1-6. From the remaining scaffolds, 10 scaffolds (> 8 Mbp) were selected as  
301 potential microchromosomes. This suggested to us that one scaffold comprises two  
302 microchromosomes fused together as the expected number of microchromosomes was 11.  
303 Synteny analysis suggested that scaffold 8 (Fig. 6) has at least three origins in other closely  
304 related species. For example, in *S. meriana*, three microchromosome account for this scaffold,  
305 while the rest of scaffolds were linked to a specific microchromosome. GC content, repeat  
306 elements rate, and gene density were used as evidence [6] to find a break point on scaffold 8.  
307 We found two GC-rich spots on this scaffold, with significantly low repeat elements rate (Fig.  
308 S1). We chose the spot with significantly lower gene density to split this scaffold into two  
309 microchromosomes. Afterwards, microchromosomes were numbered based on their size.  
310 Finally, *A. carolinensis* X-linked markers [35] were used to identify the sex chromosome

### 311 **Genome annotation**

312 Repeat elements were first identified using RepeatModeler v. 1.0.11 [36] for *de novo* prediction  
313 of known and unknown repeat families. To annotate genome-wide complex repeats, we used  
314 RepeatMasker v. 4.0.8 [37] with default settings to identify known Tetrapoda repeats present in  
315 the curated Repbase database release 20181026 [38]. We then ran 2 iterative rounds of  
316 RepeatMasker to also annotate first the known and then the unknown elements identified by  
317 RepeatModeler, where the genome sequence provided for each analysis was masked based on  
318 all previous rounds of RepeatMasker. We used MAKER v. 2.31.10 [39] as a consensus-based  
319 approach to annotate protein-coding genes in an iterative fashion. Also, to annotate simple  
320 repetitive elements in the MAKER control file (maker\_opts.ctl), we set the 'model\_org' option to  
321 'simple' to have MAKER soft mask them. The full *de novo* *P. platyrhinos* transcriptome  
322 assembly and protein datasets consisting of all annotated proteins for *A. carolinensis* [11] from



323 NCBI were used as the evidence for protein coding genes. For the first round of annotation,  
324 “est2genome” and “protein2genome” were set to 1 to predict genes based on the aligned  
325 transcripts and proteins. Using the gene models from the first round of MAKER, we were able to  
326 train gene prediction software AUGUSTUS v. 3.2.3. [40]. To do so, we used Benchmarking  
327 Universal Single-Copy Orthologs (BUSCOs) v. 2.0.1, which has an internal pipeline to automate  
328 the training of Augustus based on a set of conserved, single-copy orthologs for Tetrapoda  
329 (Tetrapoda odb9 dataset) [41]. We ran BUSCO in the ‘genome’ mode and specified the ‘--long’  
330 option to have BUSCO perform internal Augustus parameter optimization. Then we ran MAKER  
331 with *ab initio* gene prediction (‘est2genome=0’ and ‘protein2genome=0’ options set) using  
332 transcripts, proteins, and repeat elements resulted from the first MAKER round as the empirical  
333 evidence (in GFF format) to produce gene models using the AUGUSTUS within the MAKER.  
334 For all MAKER analyses, we used default settings, except for ‘trna’ (set to 1), ‘max\_dna\_len’  
335 (set to 300,000) and ‘split\_hit’ (set to 20,000). We used the gene models from our second round  
336 of MAKER annotation to re-optimize AUGUSTUS as described above before running one final  
337 MAKER analysis (round 3) with the re-optimized AUGUSTUS settings (all other settings are  
338 identical to round 2). We compared Annotation Edit Distance (AED) distributions, gene  
339 numbers, and average gene lengths across each round of Maker annotation to assess quality  
340 and used our final MAKER round (round 3; N = 20,764 genes) as our final gene annotation. We  
341 ascribed gene IDs based on homology using reciprocal best-blast (with e-value thresholds of  
342 1e-5) and stringent one-way blast (with an e-value threshold of 1e-8) searches against protein  
343 sequences from NCBI for *A. carolinensis*, *Pogona vitticeps* [42], *P. muralis* [14], *Gekko*  
344 *Japanese* [43], *Python molurus* [44], *Pseudonaja textilis* [45], *Notechis scutatus* [45],  
345 *Protobothrops mucrosquamatus* [46], *Thamnophis sirtalis* [47], *Alligator mississippiensis* [48],  
346 *Alligator sinensis* [49], *Crocodylus porosus* [50], *Chrysemys picta* [51], *Terrapene Carolina* [52],  
347 *Chelonia mydas* [53], *Pelodiscus sinensis* [53], *G. gallus*, *Homo sapiens* [54], and *Mus*

348 *musculus* [55], also against Swiss-Prot [56] and Interpro database [57] using Reciprocal Best  
349 Blast (RBB) pipeline (<https://darencard.net/blog/2019-01-25-UCSC-genome-track-setup/>).

### 350 **Gene ontology**

351 A list of all annotated genes on each chromosome was used for ontology analysis in PANTHER  
352 (<http://pantherdb.org/>) classification system. PANTHER assigned each gene to one of 8 “level 1”  
353 molecular functions on chromosomes: binding (GO:0005488), catalytic activity (GO:0003824),  
354 molecular function regulator (GO:0098772), molecular transducer activity (GO:0060089),  
355 structural molecule activity (GO:0005198), transcription regulator activity (GO:0140110),  
356 translation regulator activity (GO:0045182), and transporter activity (GO:0005215) (Table S3).  
357 To be able to observe more detail about the functions of each category, we also compared  
358 “level 2” and “level 3” molecular functions between macrochromosomes and  
359 microchromosomes.

### 360 **Synteny and chromosomal composition**

361 GC content, gene density, and repeat elements rate were quantified by breaking each  
362 chromosome to 1Gb windows using bedtools-2.28 (“makewindows” option) [58].  
363 We explored broad-scale structural evolution across reptilian genomes using synteny analyses.  
364 We obtained chromosome-level genome assemblies from NCBI database  
365 (<https://www.ncbi.nlm.nih.gov/assembly/?term=reptiles>) for five lizards (*A. carolinensis*, *S.*  
366 *merianae*, *L. agilis*, *P. muralis*, and *Z. vivipara*), three snakes (*C. viridis*, *T. elegans*, and *N.*  
367 *naja*), one bird (*G. gallus*), and three turtles (*T. scripta*, *G. evgoodei*, and *D. coriacea*). We used  
368 Blackmon’s painting method [59] for silico painting to partition the *P. platyrhinos* genome to  
369 18.39 million 100-bp markers. We then used these markers to BLAST (with setting “-max\_hsp”  
370 and “-max\_target\_seqs” to 1) against each genome that painted numerous fragments in each  
371 genome assembly (Table S4).

372 Following the synteny analysis approach in Schield et al. (2019), homology signals for  
373 chromosome painting had two main conditions: 1) each marker should have an alignment length  
374 of 50 bp or greater, and 2) at least five consecutive markers must be present to infer homology  
375 (Table S4). This was determined for scaffolds from each species. For posterior analyses based  
376 on the synteny results, only the assembled chromosomes of each species were considered.  
377 *Salvator merianae* was the only species in our analysis without assembled chromosomes, so  
378 we analyzed the 19 longest scaffolds (since karyotype analysis showed  $2n=38$ )[60] containing  
379 the majority of confirmed homologies (Table S4).

380 To assess the distribution of *P. platyrhinos* homologies across scaffolds from the 12 target  
381 species, we calculated Simpson's Dominance Index (D) and its reciprocal, which, in this context,  
382 can be considered the effective number of target chromosomes (C) containing homologies from  
383 a given *P. platyrhinos* chromosome:

$$384 \quad D_{ij} = \sum_{k=1}^m p_{ijk}^2$$

$$385 \quad C_{ij} = \frac{1}{D_{ij}}$$

386 Where  $i$  represents a *P. platyrhinos* chromosome,  $j$  represents a target species,  $m$  is the  
387 number of scaffolds in the target species  $j$  containing homologies from the  $i^{th}$  *P. platyrhinos*  
388 chromosome, and  $k$  represents a specific target scaffold. Values of D can range between 0 (low  
389 dominance, i.e. high spread of homologies) and 1 (full dominance, i.e. homologies remained in  
390 one target scaffold). Values of C can range between 1 (full dominance) and  $m$  (low dominance,  
391 i.e. equal spread of the  $i^{th}$  homologies across  $m$  target scaffolds).

## 392 Availability of supporting data and materials

393 The chromosome-level genome assembly, annotation files, and other supporting data sets are  
394 (will be) available in the *GigaScience* database (GigaDB). Raw genomic and transcriptomic  
395 sequencing reads were deposited in the NCBI SRA under accession number PRJNA685451.

## 396 List of abbreviations

397 AED: Annotation Edit Distance  
398 BUSCO: Benchmarking Universal Single-Copy Orthologs  
399 C: Effective number of target Chromosomes  
400 D: Simpson's Dominance index  
401 gBGC: GC-Biased Gene Conversion  
402 GD: Gene Density  
403 HAT: Histone Acetyl Transferase  
404 HDAC: Histone Deacetylase  
405 TFs: Transcription Factors

## 406 Ethics Approval

407 All animal collected and euthanized according to Miami University Institutional Animal Care and  
408 Use Committee protocol 992\_2021\_Apr.

## 409 Competing interests

410 The authors declare that they have no competing interests.

411 **Authors' contributions**

412 N.K., T.J., and T.C. designed the project and wrote the manuscript. T.J collected the samples  
413 and supervised the project. N.K., A.A., K.F., D.C., and D.S. performed bioinformatics and data  
414 analyses. All authors read and approved the final manuscript.

415 **Acknowledgments**

416 This work was supported by startup funds from Miami University to T.J.

417

## 418 References

- 419 1. Deakin, J. E., and Ezaz, T. (2019a). Understanding the Evolution of Reptile Chromosomes  
420 through Applications of Combined Cytogenetics and Genomics Approaches. *Cytogenetic*  
421 *and Genome Research*, 157(1–2), 7–20. <https://doi.org/10.1159/000495974>
- 422 2. Gemmell, N. J., Rutherford, K., Prost, S., Tollis, M., Winter, D., Macey, J. R., Adelson, D. L.,  
423 Suh, A., Bertozzi, T., Grau, J. H., Organ, C., Gardner, P. P., Muffato, M., Patricio, M., Billis,  
424 K., Martin, F. J., Flicek, P., Petersen, B., Kang, L., ... Stone, C. (2020b). The tuatara genome  
425 reveals ancient features of amniote evolution. *Nature*, 584(7821), 403–409.  
426 <https://doi.org/10.1038/s41586-020-2561-9>
- 427 3. Axelsson, E. (2005c). Comparison of the chicken and turkey genomes reveals a higher rate of  
428 nucleotide divergence on microchromosomes than macrochromosomes. *Genome*  
429 *Research*, 15(1), 120–125. <https://doi.org/10.1101/gr.3021305>
- 430 4. Burt, D. W. (2002d). Origin and evolution of avian microchromosomes. *Cytogenetic and*  
431 *Genome Research*, 96(1–4), 97–112. <https://doi.org/10.1159/000063018>
- 432 5. O'Connor, R. E., Kiazim, L., Skinner, B., Fonseka, G., Joseph, S., Jennings, R., Larkin, D. M.,  
433 and Griffin, D. K. (2019e). Patterns of microchromosome organization remain highly  
434 conserved throughout avian evolution. *Chromosoma*, 128(1), 21–29.  
435 <https://doi.org/10.1007/s00412-018-0685-6>
- 436 6. Schield, D. R., Card, D. C., Hales, N. R., Perry, B. W., Pasquesi, G. M., Blackmon, H., Adams,  
437 R. H., Corbin, A. B., Smith, C. F., Ramesh, B., Demuth, J. P., Betrán, E., Tollis, M., Meik, J.  
438 M., Mackessy, S. P., and Castoe, T. A. (2019f). The origins and evolution of chromosomes,  
439 dosage compensation, and mechanisms underlying venom regulation in snakes. *Genome*  
440 *Research*, 29(4), 590–601. <https://doi.org/10.1101/gr.240952.118>

- 441 7. Schield, D. R., Pasquesi, G. I. M., Perry, B. W., Adams, R. H., Nikolakis, Z. L., Westfall, A. K.,  
442 Orton, R. W., Meik, J. M., Mackessy, S. P., and Castoe, T. A. (2020g). Snake Recombination  
443 Landscapes Are Concentrated in Functional Regions despite PRDM9. *Molecular Biology  
444 and Evolution*, 37(5), 1272–1294. <https://doi.org/10.1093/molbev/msaa003>
- 445 8. Damas, J., Kim, J., Farré, M., Griffin, D. K., and Larkin, D. M. (2018h). Reconstruction of avian  
446 ancestral karyotypes reveals differences in the evolutionary history of macro- and  
447 microchromosomes. *Genome Biology*, 19(1), 155. [https://doi.org/10.1186/s13059-018-  
1544-8](https://doi.org/10.1186/s13059-018-<br/>448 1544-8)
- 449 9. Axelsson, E., Webster, M. T., Smith, N. G. C., Burt, D. W., and Ellegren, H. (2005i). Comparison  
450 of the chicken and turkey genomes reveals a higher rate of nucleotide divergence on  
451 microchromosomes than macrochromosomes. *Genome Research*, 15(1), 120–125.  
452 <https://doi.org/10.1101/gr.3021305>
- 453 10. Perry, B. W., Schield, D. R., Adams, R. H., and Castoe, T. A. (2020j). Microchromosomes  
454 Exhibit Distinct Features of Vertebrate Chromosome Structure and Function with  
455 Underappreciated Ramifications for Genome Evolution. *Molecular Biology and Evolution*, 1–  
456 7. <https://doi.org/10.1093/molbev/msaa253>
- 457 11. Alföldi, J., Di Palma, F., Grabherr, M., Williams, C., Kong, L., Mauceli, E., Russell, P., Lowe,  
458 C. B., Glor, R. E., Jaffe, J. D., Ray, D. A., Boissinot, S., Shedlock, A. M., Botka, C., Castoe,  
459 T. A., Colbourne, J. K., Fujita, M. K., Moreno, R. G., ten Hallers, B. F., ... Lindblad-Toh, K.  
460 (2011k). The genome of the green anole lizard and a comparative analysis with birds and  
461 mammals. *Nature*, 477(7366), 587–591. <https://doi.org/10.1038/nature10390>
- 462 12. Yurchenko, A. A., Recknagel, H., and Elmer, K. R. (2020l). Chromosome-level assembly of  
463 the common lizard (*Zootoca vivipara*) genome. *Genome Biology and Evolution*.  
464 <https://doi.org/10.1093/gbe/evaa161>

- 465 13. Gemmell, N., Haase, B., Formenti, G., Sims, Y., Wood, J., Howe, K., Mountcastle, J., Lillie,  
466 M., Olsson, M., Rhie, A., Fedrigo, O., and Jarvis, E. D. (2019m). *Lacerta agilis* (Sand lizard)  
467 genome, rLacAgi1, primary haplotype. *Vertebrate Genomes Project, G10K, 1230 York*  
468 *Avenue, New York, NY 10065, USA.*
- 469 14. Andrade, P., Pinho, C., Pérez i de Lanuza, G., Afonso, S., Brejcha, J., Rubin, C.-J.,  
470 Wallerman, O., Pereira, P., Sabatino, S. J., Bellati, A., Pellitteri-Rosa, D., Bosakova, Z.,  
471 Bunikis, I., Carretero, M. A., Feiner, N., Marsik, P., Paupério, F., Salvi, D., Soler, L., ...  
472 Carneiro, M. (2019n). Regulatory changes in pterin and carotenoid genes underlie balanced  
473 color polymorphisms in the wall lizard. *Proceedings of the National Academy of Sciences,*  
474 *116(12), 5633–5642. <https://doi.org/10.1073/pnas.1820320116>*
- 475 15. Roscito, J. G., Sameith, K., Pippel, M., Francoijs, K.-J., Winkler, S., Dahl, A., Papoutsoglou,  
476 G., Myers, G., and Hiller, M. (2018o). The genome of the tegu lizard *Salvator merianae* :  
477 combining Illumina, PacBio, and optical mapping data to generate a highly contiguous  
478 assembly. *GigaScience, 7(12), 1–13. <https://doi.org/10.1093/gigascience/giy141>*
- 479 16. Jezkova, T., Jaeger, J. R., Oláh-Hemmings, V., Jones, K. B., Lara-Resendiz, R. A., Mulcahy,  
480 D. G., and Riddle, B. R. (2016p). Range and niche shifts in response to past climate change  
481 in the desert horned lizard *Phrynosoma platyrhinos*. *Ecography, 39(5), 437–448.*  
482 <https://doi.org/10.1111/ecog.01464>
- 483 17. Pasquesi, G. I. M., Adams, R. H., Card, D. C., Schield, D. R., Corbin, A. B., Perry, B. W.,  
484 Reyes-Velasco, J., Ruggiero, R. P., Vandewege, M. W., Shortt, J. A., and Castoe, T. A.  
485 (2018q). Squamate reptiles challenge paradigms of genomic repeat element evolution set  
486 by birds and mammals. *Nature Communications, 9(1), 2774. [https://doi.org/10.1038/s41467-](https://doi.org/10.1038/s41467-018-05279-1)*  
487 *018-05279-1*
- 488 18. Bronikowski, A., Fedrigo, O., Functammasan, C., Rhie, A., Mountcastle, J., Haase, B., Howe,



- 489 K., Chow, W., Collins, J., and Jarvis, E. D. (2019r). hamnophis elegans (Western terrestrial  
490 garter snake) genome, rThaEle1, primary haplotype. *Vertebrate Genomes Project, G10K,*  
491 *1230 York Avenue, New York, NY 10065, USA.*
- 492 19. Suryamohan, K., Seshagiri, S., and Guillory, J. (2019s). Nana\_v5. *Molecular Biology,*  
493 *Genentech Inc., 1 DNA Way, South San Francisco, CA 94403, USA.*
- 494 20. Hillier, L. W., Miller, W., Birney, E., Warren, W., Hardison, R. C., Ponting, C. P., Bork, P., Burt,  
495 D. W., Groenen, M. A. M., Delany, M. E., Dodgson, J. B., Chinwalla, A. T., Cliften, P. F.,  
496 Clifton, S. W., Delehaunty, K. D., Fronick, C., Fulton, R. S., Graves, T. A., Kremitzki, C., ...  
497 Wilson, R. K. (2004t). Sequence and comparative analysis of the chicken genome provide  
498 unique perspectives on vertebrate evolution. *Nature*, 432(7018), 695–716.  
499 <https://doi.org/10.1038/nature03154>
- 500 21. Brian Simison, W., Parham, J. F., Papenfuss, T. J., Lam, A. W., and Henderson, J. B. (2020u).  
501 An Annotated Chromosome-Level Reference Genome of the Red-Eared Slider Turtle  
502 (*Trachemys scripta elegans*). *Genome Biology and Evolution*, 12(4), 456–462.  
503 <https://doi.org/10.1093/gbe/evaa063>
- 504 22. Murphy, B., Edwards, T., Rhie, A., Koren, S., Phillippy, A., Fedrigo, O., Haase, B.,  
505 Mountcastle, J., Lewin, H., Damas, J., Howe, K., Formenti, G., Myers, G., Durbin, R., and  
506 Jarvis, E. D. (2019v). G10K-VGP Goodes thornscrub tortoise genome, primary haplotype.  
507 *Vertebrate Genomes Project, G10K, 1230 York Avenue, New York, NY 10065, USA.*
- 508 23. Omoroske, L., Fedrigo, O., Mountcastle, J., Uliano Da Silva, M., Haase, B., Formenti, G.,  
509 Chow, W., Howe, K., Gilbert, M. T. P., Flicek, P., Gemmell, N., Marques, T., Scott, A.,  
510 Murphy, R., Bjorndal, K., Braun, E., Rhie, A., Phillippy, A., and Jarvis, E. D. (2019w).  
511 (UPDATE)Dermochelys coriacea (Leatherback Sea Turtle) genome, rDerCor1, primary  
512 haplotype, v3. *Vertebrate Genomes Project, G10K, 1230 York Avenue, New York, NY*

513 10065, USA.

- 514 24. Putnam, N. H., O'Connell, B. L., Stites, J. C., Rice, B. J., Blanchette, M., Calef, R., Troll, C.  
515 J., Fields, A., Hartley, P. D., Sugnet, C. W., Haussler, D., Rokhsar, D. S., and Green, R. E.  
516 (2016x). Chromosome-scale shotgun assembly using an in vitro method for long-range  
517 linkage. *Genome Research*, 26(3), 342–350. <https://doi.org/10.1101/gr.193474.115>
- 518 25. Rovatsos, M., Pokorná, M., Altmanová, M., and Kratochvíl, L. (2014y). Cretaceous park of  
519 sex determination: sex chromosomes are conserved across iguanas. *Biology Letters*, 10(3),  
520 20131093. <https://doi.org/10.1098/rsbl.2013.1093>
- 521 26. Mi, H., Muruganujan, A., Casagrande, J. T., and Thomas, P. D. (2013z). Large-scale gene  
522 function analysis with the PANTHER classification system. *Nature Protocols*, 8(8), 1551–  
523 1566. <https://doi.org/10.1038/nprot.2013.092>
- 524 27. Lee, J. W., Cheong, J. H., Lee, Y. C., Na, S. Y., and Lee, S. K. (2000aa). Dissecting the  
525 molecular mechanism of nuclear receptor action: Transcription coactivators and  
526 corepressors. *Experimental and Molecular Medicine*, 32(2), 53–60.  
527 <https://doi.org/10.1038/emm.2000.10>
- 528 28. Hill, M. O. (1973ab). Diversity and Evenness: A Unifying Notation and Its Consequences  
529 Author ( s ): M . O . Hill Published by : Ecological Society of America DIVERSITY AND  
530 EVENNESS : A UNIFYING NOTATION AND ITS CONSEQUENCES '. *Ecology*, 54(2), 427–  
531 432.
- 532 29. Schield, D. R., Card, D. C., Hales, N. R., Perry, B. W., Pasquesi, G. M., Blackmon, H., Adams,  
533 R. H., Corbin, A. B., Smith, C. F., Ramesh, B., Demuth, J. P., Betrán, E., Tollis, M., Meik, J.  
534 M., Mackessy, S. P., and Castoe, T. A. (2019ac). The origins and evolution of chromosomes,  
535 dosage compensation, and mechanisms underlying venom regulation in snakes. *Genome*  
536 *Research*, 29(4), 590–601. <https://doi.org/10.1101/gr.240952.118>

- 537 30. Backstrom, N., Forstmeier, W., Schielzeth, H., Mellenius, H., Nam, K., Bolund, E., Webster,  
538 M. T., Ost, T., Schneider, M., Kempnaers, B., and Ellegren, H. (2010ad). The recombination  
539 landscape of the zebra finch *Taeniopygia guttata* genome. *Genome Research*, *20*(4), 485–  
540 495. <https://doi.org/10.1101/gr.101410.109>
- 541 31. Huttener, R., Thorrez, L., in't Veld, T., Granvik, M., Snoeck, L., Van Lommel, L., and Schuit,  
542 F. (2019ae). GC content of vertebrate exome landscapes reveal areas of accelerated protein  
543 evolution. *BMC Evolutionary Biology*, *19*(1), 144. [https://doi.org/10.1186/s12862-019-1469-](https://doi.org/10.1186/s12862-019-1469-1)  
544 1
- 545 32. Dreszer, T. R., Wall, G. D., Haussler, D., and Pollard, K. S. (2007af). Biased clustered  
546 substitutions in the human genome: the footprints of male-driven biased gene conversion.  
547 *Genome Research*, *17*(10), 1420–1430. <https://doi.org/10.1101/gr.6395807>
- 548 33. Leaché, A. D., and Sites, Jr., J. W. (2009ag). Chromosome Evolution and Diversification in  
549 North American Spiny Lizards (Genus *Sceloporus*). *Cytogenetic and Genome Research*,  
550 *127*(2–4), 166–181. <https://doi.org/10.1159/000293285>
- 551 34. Srikulnath, K., Nishida, C., Matsubara, K., Uno, Y., Thongpan, A., Suputtitada, S.,  
552 Apisitwanich, S., and Matsuda, Y. (2009ah). Karyotypic evolution in squamate reptiles:  
553 comparative gene mapping revealed highly conserved linkage homology between the  
554 butterfly lizard (*Leiolepis reevesii rubritaeniata*, Agamidae, Lacertilia) and the Japanese four-  
555 striped rat snake (*Elaphe quadrivirg.* *Chromosome Research*, *17*(8), 975–986.  
556 <https://doi.org/10.1007/s10577-009-9101-7>
- 557 35. Srikulnath, K., Matsubara, K., Uno, Y., Nishida, C., Olsson, M., and Matsuda, Y. (2014ai).  
558 Identification of the linkage group of the Z sex chromosomes of the sand lizard (*Lacerta*  
559 *agilis*, Lacertidae) and elucidation of karyotype evolution in lacertid lizards. *Chromosoma*,  
560 *123*(6), 563–575. <https://doi.org/10.1007/s00412-014-0467-8>

- 561 36. Smit, A., and Hubley, R. (2015aj). *RepeatModeler* (Open-1.0. 2008-2015).  
562 <http://www.repeatmasker.org>
- 563 37. Smit, AFA, Hubley, R., and Green, P. (n.d.-ak). *RepeatMasker* (Open-4.0).  
564 <http://www.repeatmasker.org>
- 565 38. Bao, W., Kojima, K. K., and Kohany, O. (2015al). Repbase Update, a database of repetitive  
566 elements in eukaryotic genomes. *Mobile DNA*, 6(1), 11. [https://doi.org/10.1186/s13100-015-](https://doi.org/10.1186/s13100-015-0041-9)  
567 0041-9
- 568 39. Cantarel, B. L., Korf, I., Robb, S. M. C., Parra, G., Ross, E., Moore, B., Holt, C., Sanchez  
569 Alvarado, A., and Yandell, M. (2007am). MAKER: An easy-to-use annotation pipeline  
570 designed for emerging model organism genomes. *Genome Research*, 18(1), 188–196.  
571 <https://doi.org/10.1101/gr.6743907>
- 572 40. Stanke, M., and Morgenstern, B. (2005an). AUGUSTUS: a web server for gene prediction in  
573 eukaryotes that allows user-defined constraints. *Nucleic Acids Research*, 33(Web Server),  
574 W465–W467. <https://doi.org/10.1093/nar/gki458>
- 575 41. Simão, F. A., Waterhouse, R. M., Ioannidis, P., Kriventseva, E. V., and Zdobnov, E. M.  
576 (2015ao). BUSCO: assessing genome assembly and annotation completeness with single-  
577 copy orthologs. *Bioinformatics*, 31(19), 3210–3212.  
578 <https://doi.org/10.1093/bioinformatics/btv351>
- 579 42. Georges, A., Li, Q., Lian, J., O’Meally, D., Deakin, J., Wang, Z., Zhang, P., Fujita, M., Patel,  
580 H. R., Holleley, C. E., Zhou, Y., Zhang, X., Matsubara, K., Waters, P., Graves, J. A. M., Sarre,  
581 S. D., and Zhang, G. (2015ap). High-coverage sequencing and annotated assembly of the  
582 genome of the Australian dragon lizard *Pogona vitticeps*. *GigaScience*, 4(1), 45.  
583 <https://doi.org/10.1186/s13742-015-0085-2>

- 584 43. Liu, Y., Zhou, Q., Wang, Y., Luo, L., Yang, J., Yang, L., Liu, M., Li, Y., Qian, T., Zheng, Y., Li,  
585 M., Li, J., Gu, Y., Han, Z., Xu, M., Wang, Y., Zhu, C., Yu, B., Yang, Y., ... Gu, X. (2015aq).  
586 Gekko japonicus genome reveals evolution of adhesive toe pads and tail regeneration.  
587 *Nature Communications*, 6(1), 10033. <https://doi.org/10.1038/ncomms10033>
- 588 44. Castoe, T. A., de Koning, A. J., Hall, K. T., Yokoyama, K. D., Gu, W., Smith, E. N., Feschotte,  
589 C., Uetz, P., Ray, D. A., Dobry, J., Bogden, R., Mackessy, S. P., Bronikowski, A. M., Warren,  
590 W. C., Secor, S. M., and Pollock, D. D. (2011ar). Sequencing the genome of the Burmese  
591 python (*Python molurus bivittatus*) as a model for studying extreme adaptations in snakes.  
592 *Genome Biology*, 12(7), 406. <https://doi.org/10.1186/gb-2011-12-7-406>
- 593 45. Edwards J, R. (2018as). Direct Submission. *UNIVERSITY OF NEW SOUTH WALES,*  
594 *Edwards Lab, E26/2110 BioScience South, UNSW SYDNEY, NSW 2052, Australia.*
- 595 46. Aird, S. D., Arora, J., Barua, A., Qiu, L., Terada, K., and Mikheyev, A. S. (2017at). Population  
596 Genomic Analysis of a Pitviper Reveals Microevolutionary Forces Underlying Venom  
597 Chemistry. *Genome Biology and Evolution*, 9(10), 2640–2649.  
598 <https://doi.org/10.1093/gbe/evx199>
- 599 47. Warren, W. C., and Wilson, R. K. (2015au). Direct Submission. *The Genome Institute,*  
600 *Washington University School of Medicine, 4444 Forest Park, St. Louis, MO 63108, USA.*
- 601 48. St John, J. A., Braun, E. L., Isberg, S. R., Miles, L. G., Chong, A. Y., Gongora, J., Dalzell, P.,  
602 Moran, C., Bed'Hom, B., Abzhanov, A., Burgess, S. C., Cooksey, A. M., Castoe, T. A.,  
603 Crawford, N. G., Densmore, L. D., Drew, J. C., Edwards, S. V., Faircloth, B. C., Fujita, M. K.,  
604 ... Ray, D. A. (2012av). Sequencing three crocodylian genomes to illuminate the evolution of  
605 archosaurs and amniotes. *Genome Biology*, 13(1), 415. [https://doi.org/10.1186/gb-2012-13-](https://doi.org/10.1186/gb-2012-13-1-415)  
606 [1-415](https://doi.org/10.1186/gb-2012-13-1-415)
- 607 49. Wan, Q., Pan, S., Hu, L., Zhu, Y., Xu, P., Xia, J., Chen, H., He, G., He, J., Ni, X., Hou, H.,

- 608 Liao, S., Yang, H., Chen, Y., Gao, S., Ge, Y., Cao, C., Li, P., Fang, L., ... Fang, S. (2013aw).  
609 The genome sequence of Chinese alligator (*Alligator sinensis*). *BGI-Shenzhen, Beishan*  
610 *Industrial Zone, Yantian District, Shenzhen, Guangdong 518083, China.*
- 611 50. Pham, S., Fiddes, I., Deran, A., Armstrong, J., Rice, E. S., and Paten, B. (2016ax).  
612 Comparative assembly of saltwater crocodile genome. *Biomolecular Engineering, University*  
613 *of California, Santa Cruz, 1156 High St., Santa Cruz, CA 95064, USA.*
- 614 51. Badenhorst, D., Hillier, L. W., Literman, R., Montiel, E. E., Radhakrishnan, S., Shen, Y., Minx,  
615 P., Janes, D. E., Warren, W. C., Edwards, S. V., and Valenzuela, N. (2015ay). Physical  
616 Mapping and Refinement of the Painted Turtle Genome (*Chrysemys picta*) Inform Amniote  
617 Genome Evolution and Challenge Turtle-Bird Chromosomal Conservation. *Genome Biology*  
618 *and Evolution*, 7(7), 2038–2050. <https://doi.org/10.1093/gbe/evv119>
- 619 52. Deem, S. L., and Warren, W. C. (2018az). Direct Submission. *McDonnell Genome Institute,*  
620 *Washington University School of Medicine, 4444 Forest Park, St. Louis, MO 63108, USA.*
- 621 53. Wang, Z., Pascual-anaya, J., Zadissa, A., Li, W., and Niimura, Y. (2014ba). *Europe PMC*  
622 *Funders Group The draft genomes of soft – shell turtle and green sea turtle yield insights*  
623 *into the development and evolution of the turtle – specific body plan.* 45(6), 701–706.  
624 <https://doi.org/10.1038/ng.2615>.The
- 625 54. Venter, J. C., Adams, M. D., Myers, E. W., Li, P. W., Mural, R. J., Sutton, G. G., Smith, H. O.,  
626 Yandell, M., Evans, C. A., Holt, R. A., Gocayne, J. D., Amanatides, P., Ballew, R. M., Huson,  
627 D. H., Wortman, J. R., Zhang, Q., Kodira, C. D., Zheng, X. H., Chen, L., ... Zhu, X. (2001bb).  
628 The Sequence of the Human Genome. *Science*, 291(5507), 1304–1351.  
629 <https://doi.org/10.1126/science.1058040>
- 630 55. Brent, M. R., Birren, B. W., Antonarakis, S. E., Alexandersson, M., Zody, M., Birney, E.,  
631 Baertsch, R., Cuff, J., Parra, G., Slater, G., Waterston, R. H., Lindblad-Toh, K., Rogers, J.,

- 632 Abril, J. F., Agarwal, P., Agarwala, R., Ainscough, R., An, P., Attwood, J., ... Lander, E. S.  
633 (2002bc). Initial sequencing and comparative analysis of the mouse genome. *Nature*,  
634 420(6915), 520–562.  
635 <http://www.nature.com/nature/journal/v420/n6915/full/nature01262.html>
- 636 56. Bateman, A. (2019bd). UniProt: a worldwide hub of protein knowledge. *Nucleic Acids*  
637 *Research*, 47(D1), D506–D515. <https://doi.org/10.1093/nar/gky1049>
- 638 57. Blum, M., Chang, H.-Y., Chuguransky, S., Grego, T., Kandasaamy, S., Mitchell, A., Nuka, G.,  
639 Paysan-Lafosse, T., Qureshi, M., Raj, S., Richardson, L., Salazar, G. A., Williams, L., Bork,  
640 P., Bridge, A., Gough, J., Haft, D. H., Letunic, I., Marchler-Bauer, A., ... Finn, R. D. (2021be).  
641 The InterPro protein families and domains database: 20 years on. *Nucleic Acids Research*,  
642 49(D1), D344–D354. <https://doi.org/10.1093/nar/gkaa977>
- 643 58. Quinlan, A. R., and Hall, I. M. (2010bf). BEDTools: a flexible suite of utilities for comparing  
644 genomic features. *Bioinformatics*, 26(6), 841–842.  
645 <https://doi.org/10.1093/bioinformatics/btq033>
- 646 59. McKenna, D. D., Scully, E. D., Pauchet, Y., Hoover, K., Kirsch, R., Geib, S. M., Mitchell, R.  
647 F., Waterhouse, R. M., Ahn, S.-J., Arsala, D., Benoit, J. B., Blackmon, H., Bledsoe, T.,  
648 Bowsher, J. H., Busch, A., Calla, B., Chao, H., Childers, A. K., Childers, C., ... Richards, S.  
649 (2016bg). Genome of the Asian longhorned beetle (*Anoplophora glabripennis*), a globally  
650 significant invasive species, reveals key functional and evolutionary innovations at the  
651 beetle–plant interface. *Genome Biology*, 17(1), 227. [https://doi.org/10.1186/s13059-016-](https://doi.org/10.1186/s13059-016-1088-8)  
652 1088-8
- 653 60. da Silva, M. J., de Araújo Vieira, A. P., Galvão Cipriano, F. M., dos Santos Cândido, M. R.,  
654 de Oliveira, E. H. C., Gimenez Pinheiro, T., and da Silva, E. L. (2020bh). The Karyotype of  
655 *Salvator merianae* (Squamata, Teiidae): Analyses by Classical and Molecular Cytogenetic

656 Techniques. *Cytogenetic and Genome Research*, 160(2), 94–99.  
657 <https://doi.org/10.1159/000506140>

658 61. Hedges, S. B., Dudley, J., and Kumar, S. (2006bi). TimeTree: a public knowledge-base of  
659 divergence times among organisms. *Bioinformatics*, 22(23), 2971–2972.  
660 <https://doi.org/10.1093/bioinformatics/btl505>

661



## 662 FIGURES

663 **Figure 1.** Reptile phylogeny adapted from [2]. For each major clade, we list diploid chromosome numbers,  
664 macrochromosome numbers, and microchromosome numbers [1]

665 **Figure 2.** The genome content of *P. platyrhinos*. The outer circle shows gene density on each chromosome, the  
666 middle circle shows repeat element density, and the inner one shows GC content. Each estimate is calculated per 1  
667 million base pair window.

668 **Figure 3.** Synteny between *P. platyrhinos* and 12 reptilian taxa: three snakes (*N. naja*, *T. elegance*, and *C. viridis*),  
669 five lizards (*A. carolinensis*, *L. agilis*, *Z. vivipara*, *P. muralis*, and *S. merianae*), three turtles (*T. scripta*, *G. evgoodei*,  
670 and *D. coriacea*), and a bird (*G. gallus*). The cladogram shows the phylogenetic relationships among the sampled  
671 taxa [61].

672 **Figure 4.** Effective number of chromosomes (C) assessed using the dominance analysis. Values close to 1 represent  
673 full dominance (homologies from a given *P. platyrhinos* chromosome are contained within a single  
674 chromosome/scaffold of another species). Values higher than 1 mean a spread of homologies across multiple  
675 chromosomes/scaffolds.

676 **Figure 5.** Summary of the effective number of chromosomes (C) of *P. platyrhinos* in comparison with the 12 target  
677 species. Values close to 1 represent full dominance (homologies from a given *P. platyrhinos* chromosome are  
678 contained within a single chromosome/scaffold). Values higher than 1 mean a spread of homologies across multiple  
679 chromosomes/scaffolds.

680 **Figure 6.** Synteny between *P. platyrhinos* potential microchromosomes before numbering them and the 12 reptilian  
681 genomes. The cladogram shows the phylogenetic relationships among the assessed taxa [61].

682 **Figure S1.** Repeat elements, GC content, and gene density calculated in 1Mb windows were used as evidence to  
683 find break point on scaffold 8.

684

## 685 TABLES

686 Table 1. Basic information about the *P. platyrhinos* genome assembly.

| <b>Assembly</b>            | <b>Chicago Assembly</b> | <b>Chicago + Hi-C Assembly</b> |
|----------------------------|-------------------------|--------------------------------|
| Longest Scaffold (bp)      | 361,415,485             | 396,190,715                    |
| Number of Scaffolds        | 5,458                   | 5,294                          |
| Number of Scaffolds > 1 kb | 5,458                   | 5,294                          |
| Contig N50 (kb)            | 12.04                   | 12.04                          |
| Scaffold N50 (kb)          | 63,431                  | 273,213                        |
| Number of Gaps             | 258,150                 | 258,317                        |
| Percent of Genome in Gaps  | 1.54%                   |                                |

687

688 Table 2. The length in base pairs for each chromosome of *P. platyrhinos*

| Chromosome name     | length (in base pairs) |
|---------------------|------------------------|
| Chromosome 1        | 396,190,715            |
| Chromosome 2        | 336,734,411            |
| Chromosome 3-a      | 178,616,284            |
| Chromosome 3-b      | 123,146,639            |
| Chromosome 4        | 273,212,746            |
| Chromosome 5        | 219,432,639            |
| Chromosome 6        | 129,273,435            |
| Microchromosome 1   | 31,685,405             |
| Microchromosome 2   | 28,086,253             |
| Microchromosome 3   | 27,277,973             |
| Microchromosome 4   | 27,087,043             |
| Microchromosome 5   | 26,097,904             |
| Microchromosome 6   | 23,702,528             |
| Microchromosome 7   | 20,466,995             |
| Microchromosome 8   | 16,009,790             |
| Microchromosome 9/X | 15,721,303             |
| Microchromosome 10  | 11,894,615             |
| Microchromosome 11  | 8,897,685              |

689

690 Table 3. Sequencing libraries used for the genome assembly of *P. platyrhinos*.

| <b>Library</b>             | <b>Read Type</b> | <b>Number of Reads</b> | <b>Assembly Version</b> |
|----------------------------|------------------|------------------------|-------------------------|
| Chicago library 1 (151 bp) | paired end       | 402,000,000            | Chicago                 |
| Chicago library 2 (151 bp) | paired end       | 398,000,000            | Chicago                 |
| Chicago library 3 (151 bp) | paired end       | 256,000,000            | Chicago                 |
| Hi-C library 1 (151 bp)    | paired end       | 332,000,000            | Chicago + Hi-C          |
| Hi-C library 2 (151 bp)    | paired end       | 374,000,000            | Chicago + Hi-C          |
| Hi-C library 3 (151 bp)    | paired end       | 324,000,000            | Chicago + Hi-C          |

691

692 Table 4. Number of reads obtained from 8 tissues of *P. platyrhinos*, used for transcriptome assembly.

| Sample ID    | Tissue  | Raw Reads | Quality Trimmed Reads | NCBI accession number |
|--------------|---------|-----------|-----------------------|-----------------------|
| TRO180600001 | liver   | 49736350  | 47699266              | SAMN17086063          |
| TRO180600002 | lungs   | 40643066  | 39124052              | SAMN17086064          |
| TRO180600003 | brain   | 85097044  | 81754486              | SAMN17086065          |
| TRO180600004 | muscle  | 37712026  | 34653428              | SAMN17086066          |
| TRO180600005 | testes  | 62536762  | 58283654              | SAMN17086067          |
| TRO180600006 | heart   | 34757154  | 32027338              | SAMN17086068          |
| TRO180600007 | eyes    | 46140488  | 42334272              | SAMN17086069          |
| TRO180600008 | kidneys | 41776926  | 38635176              | SAMN17086070          |

693

694 Table S1. Best BLAST hits of cDNA [34] and \*sex linked markers [25] to the genome.

| Marker   | Accession    | Chromosome | Scaffold | E-value   |
|----------|--------------|------------|----------|-----------|
| DYNC1H1  | AB490348     | 1q         | Chr1     | 2.95E-179 |
| ESR1     | AB490345     | 1p         | Chr1     | 1.02E-113 |
| WT1      | XM_016992885 | 1          | Chr1     | 2.19E-158 |
| WT1      | AB490347     | 1q         | Chr1     | 7.53E-80  |
| XAB1     | AB490344     | 1p         | Chr1     | 2.31E-35  |
| CHD1     | XM_008103079 | 2          | Chr2     | 0         |
| CHD1     | AB480289     | 2p         | Chr2     | 1.25E-144 |
| DMRT1    | XM_003216553 | 2          | Chr2     | 0         |
| DMRT1    | AB480288     | 2p         | Chr2     | 2.15E-64  |
| GHR      | XM_008102837 | 2          | Chr2     | 0         |
| GHR      | AB480290     | 2p         | Chr2     | 1.01E-104 |
| RPS6     | XM_003216606 | 2          | Chr2     | 5.32E-123 |
| RPS6     | AB480287     | 2p         | Chr2     | 2.39E-88  |
| RUFY1    | XM_008104854 | 2          | Chr2     | 0         |
| RUFY1    | AB490352     | 2q         | Chr2     | 3.45E-22  |
| EIF2S3   | XM_003218845 | 3          | Chr3-a   | 0         |
| EIF2S3   | AB490361     | 3q         | Chr3-a   | 5.58E-104 |
| OCA2     | XM_008107106 | 3          | Chr3-a   | 0         |
| OCA2     | AB490360     | 3q         | Chr3-a   | 1.78E-89  |
| SH3PXD2A | XM_016992171 | 3          | Chr3-b   | 0         |
| SH3PXD2A | AB490356     | 3p         | Chr3-b   | 5.98E-166 |
| TLOC1    | AB490355     | 3p         | Chr3-b   | 1.71E-79  |
| HDAC3    | XM_003219886 | 4          | Chr4     | 0         |
| HDAC3    | AB490365     | 4p         | Chr4     | 4.16E-97  |
| RBM12    | XM_008109953 | 4          | Chr4     | 0         |
| RBM12    | AB490367     | 4q         | Chr4     | 3.92E-137 |
| SS18     | XM_003219645 | 4          | Chr4     | 0         |
| SS18     | AB490397     | 4p         | Chr4     | 1.75E-70  |
| ZNF326   | XM_008109275 | 4          | Chr4     | 0         |

|           |                |             |             |           |
|-----------|----------------|-------------|-------------|-----------|
| ZNF326    | AB490366       | 4q          | Chr4        | 1.00E-128 |
| ACSL1     | XM_008111814   | 5           | Chr5        | 0         |
| ACSL1     | AB490370       | 5p          | Chr5        | 1.00E-95  |
| DCLK2     | XM_008111991   | 5           | Chr5        | 0         |
| DCLK2     | AB490369       | 5p          | Chr5        | 2.06E-73  |
| EXOC1     | XM_008111693   | 5           | Chr5        | 0         |
| EXOC1     | AB490371       | 5p          | Chr5        | 3.08E-176 |
| RANGAP1   | XM_008110743   | 5           | Chr5        | 0         |
| RANGAP1   | AB490374       | 5q          | Chr5        | 6.70E-80  |
| SOX5      | XM_008110345   | 5           | Chr5        | 0         |
| SOX5      | AB490376       | 5q          | Chr5        | 1.78E-104 |
| UCHL1     | XM_003221541   | 5           | Chr5        | 2.55E-63  |
| UCHL1     | AB490372       | 5p          | Chr5        | 3.46E-59  |
| CTNNB1    | AB490379       | 6q          | Chr6        | 0         |
| GAD2      | XM_003222133   | 6           | Chr6        | 0         |
| GAD2      | AB490380       | 6q          | Chr6        | 1.98E-76  |
| MYST2     | AB490378       | 6p          | Chr6        | 0         |
| WAC       | XM_008112381   | 6           | Chr6        | 0         |
| WAC       | AB490381       | 6q          | Chr6        | 3.60E-159 |
| AR        | AB490385       | micro       | microchr    | 2.72E-152 |
| TMEM132D* | XM_008113640.2 | micro "b"/X | microchr9/X | 0         |
| FZD10*    | XM_003222753.3 | micro "b"/X | microchr9/X | 0         |
| ATP2A2*   | XM_008113715   | micro "b"/X | microchr9/X | 0         |
| ATP2A2    | AB490391       | micro       | microchr9/X | 4.05E-167 |
| ATRX      | AB490386       | micro       | microchr    | 7.88E-127 |
| BRD7      | AB490390       | micro       | microchr    | 3.95E-68  |
| HSPA8     | XM_003222794   | micro "a"   | Chr1        | 0         |
| HSPA8     | AB490395       | micro       | microchr5   | 3.70E-162 |

696 Table S2. Number, length, and percentage of annotated repeat elements identified using RepeatMasker v. 4.0.8.

| Families of repeat elements       | Numbers of elements | Length masked (bp) | % of sequence | % element masked |
|-----------------------------------|---------------------|--------------------|---------------|------------------|
| <b>Retroelements</b>              | 2082017             | 451287018          | 23.83         | 20.37            |
| <b>SINEs</b>                      | 648720              | 89280596           | 4.72          | 6.35             |
| Penelope                          | 254722              | 35799757           | 1.89          | 2.50             |
| <b>LINEs</b>                      | 1311944             | 319965632          | 16.90         | 12.84            |
| L2/CR1/Rex                        | 702907              | 160952766          | 8.50          | 6.88             |
| R1/LOA/Jockey                     | 36                  | 3068               | 0.00          | 0.00             |
| R2/R4/NeSL                        | 5129                | 640551             | 0.03          | 0.05             |
| RTE/Bov-B                         | 257696              | 83172778           | 4.39          | 2.52             |
| L1/CIN4                           | 87958               | 38708200           | 2.04          | 0.86             |
| <b>LTR elements</b>               | 121353              | 42040790           | 2.22          | 1.19             |
| BEL/Pao                           | 4074                | 768559             | 0.04          | 0.04             |
| Ty1/Copia                         | 18376               | 7918963            | 0.42          | 0.18             |
| Gypsy/DIRS1                       | 39227               | 14661509           | 0.77          | 0.38             |
| Retroviral                        | 34521               | 5663234            | 0.30          | 0.34             |
| <b>DNA transposons</b>            | 1527111             | 204435133          | 10.80         | 14.94            |
| hobo-Activator                    | 610832              | 73847731           | 3.90          | 5.98             |
| Tc1-IS630-Pogo                    | 314462              | 42728561           | 2.26          | 3.08             |
| PiggyBac                          | 1795                | 445424             | 0.02          | 0.02             |
| Tourist/Harbinger                 | 500329              | 78020620           | 4.12          | 4.90             |
| <b>Unclassified</b>               | 828472              | 146176330          | 7.72          | 8.11             |
| <b>Total interspersed repeats</b> | 9351681             | 801898481          | 42.35         | 91.51            |
| Small RNA                         | 33490               | 3376969            | 0.18          | 0.33             |
| Satellites                        | 51860               | 7242936            | 0.38          | 0.51             |
| Simple repeats                    | 705413              | 27116672           | 1.43          | 6.90             |
| Low complexity                    | 77452               | 3957871            | 0.21          | 0.76             |
| <b>Total masked</b>               | 10219896            | 841750763          | 44.45         | 100.00           |



697 Table S3. Comparison of molecular functions on macrochromosomes and microchromosomes. Red shows  
 698 statistically different between that group.

| Molecular function<br>(GO category)                  | Number of function hits |            | Percentage of function hits |             |
|------------------------------------------------------|-------------------------|------------|-----------------------------|-------------|
|                                                      | Macrochr                | Microchr   | Macrochr                    | Microchr    |
| <b>translation regulator activity (GO:0045182)</b>   | <b>43</b>               | <b>9</b>   | <b>0.8</b>                  | <b>0.7</b>  |
| <b>transcription regulator activity (GO:0140110)</b> | <b>325</b>              | <b>89</b>  | <b>6.1</b>                  | <b>6.5</b>  |
| transcription coregulator activity (GO:0003712)      | 114                     | 35         | 33.6                        | 39.8        |
| transcription coactivator activity (GO:0003713)      | 62                      | 9          | 64.6                        | 34.6        |
| transcription corepressor activity (GO:0003714)      | 34                      | 17         | 35.4                        | 65.4        |
| <b>molecular transducer activity (GO:0060089)</b>    | <b>266</b>              | <b>54</b>  | <b>5.0</b>                  | <b>3.9</b>  |
| <b>binding (GO:0005488)</b>                          | <b>2,041</b>            | <b>527</b> | <b>38.3</b>                 | <b>38.2</b> |
| protein-containing complex binding (GO:0044877)      | 145                     | 40         | 3.8                         | 3.8         |
| integrin binding (GO:0005178)                        | 15                      | 0          | 12.4                        | 0           |
| <b>structural molecule activity (GO:0005198)</b>     | <b>102</b>              | <b>22</b>  | <b>1.9</b>                  | <b>1.6</b>  |

|                                                                 |              |              |             |             |
|-----------------------------------------------------------------|--------------|--------------|-------------|-------------|
| <b>molecular function</b>                                       | <b>284</b>   | <b>57</b>    | <b>5.3</b>  | <b>4.1</b>  |
| <b>regulator (GO:0098772)</b>                                   |              |              |             |             |
| enzyme regulator activity<br>(GO:0030234)                       | 183          | 39           | 67          | 72.2        |
| phosphatase inhibitor activity<br>(GO:0019212)                  | 3            | 2            | 16.7        | 28.6        |
| <b>catalytic activity<br/>(GO:0003824)</b>                      | <b>1,863</b> | <b>519</b>   | <b>35.0</b> | <b>37.6</b> |
| catalytic activity, acting on a protein<br>(GO:0140096)         | 742          | 213          | 26.1        | 27.1        |
| histone deacetylase activity<br>(GO:0004407)                    | 10           | 7            | 1.4         | 3.4         |
| <b>transporter activity<br/>(GO:0005215)</b>                    | <b>399</b>   | <b>102</b>   | <b>7.5</b>  | <b>7.4</b>  |
| transmembrane transporter activity<br>(GO:0022857)              | 361          | 95           | 89.4        | 90.5        |
| organic acid transmembrane transporter activity<br>(GO:0005342) | 63           | 7            | 6.3         | 2.8         |
|                                                                 | <b>5,323</b> | <b>1,379</b> | <b>100</b>  | <b>100</b>  |

699

700

701 Table S4. Genome assemblies and number of markers used for *in silico* painting.

| Organism               | Potential<br>single<br>markers | Total confirmed (5<br>consecutive)<br>markers | Scaffolds with<br>confirmed<br>homologies | Confirmed markers<br>in Scaffolds (%) | Assembly<br>accession |
|------------------------|--------------------------------|-----------------------------------------------|-------------------------------------------|---------------------------------------|-----------------------|
| <i>A. carolinensis</i> | 2,616,045                      | 87,155                                        | 13                                        | 57,006<br>(65.41)                     | GCF_000090745.1       |
| <i>S. merianae</i>     | 390,847                        | 31,955                                        | 19                                        | 31,805<br>(99.53)                     | GCA_003586115.<br>2   |
| <i>L. agilis</i>       | 755,639                        | 44,200                                        | 20                                        | 44,199<br>(99.99)                     | GCF_009819535.1       |
| <i>P. muralis</i>      | 719,822                        | 46,093                                        | 19                                        | 45,731<br>(99.21)                     | GCF_004329235.1       |
| <i>Z. vivipara</i>     | 751,121                        | 43,371                                        | 19                                        | 42,224<br>(97.35)                     | GCF_011800845.1       |
| <i>C. viridis</i>      | 299,173                        | 18,161                                        | 18                                        | 17,891<br>(98.51)                     | GCA_003400415.<br>2   |
| <i>T. elegans</i>      | 282,458                        | 17,817                                        | 18                                        | 17,725<br>(99.48)                     | GCF_009769535.1       |
| <i>N. naja</i>         | 291,209                        | 19,898                                        | 19                                        | 19,805<br>(99.52)                     | GCA_009733165.<br>1   |
| <i>T. scripta</i>      | 177,241                        | 15,287                                        | 25                                        | 15,252<br>(99.77)                     | GCF_013100865.1       |
| <i>G. evgoodei</i>     | 152,748                        | 14,864                                        | 24                                        | 14,614<br>(98.32)                     | GCF_007399415.2       |
| <i>D. coriacea</i>     | 137,161                        | 14,075                                        | 29                                        | 14,075<br>(100.00)                    | GCA_009764565.<br>2   |
| <i>G. gallus</i>       | 88,397                         | 10,934                                        | 33                                        | 10,934<br>(100.00)                    | GCF_000002315.6       |

702

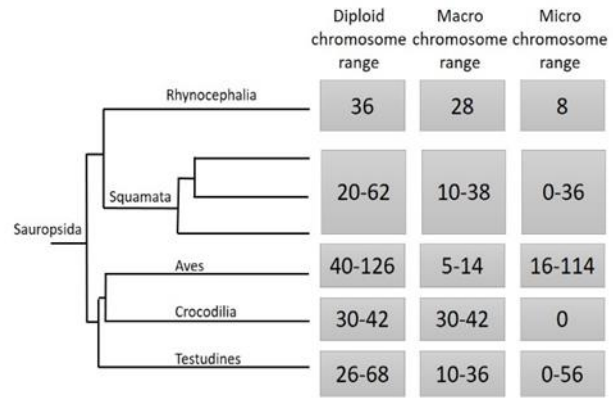

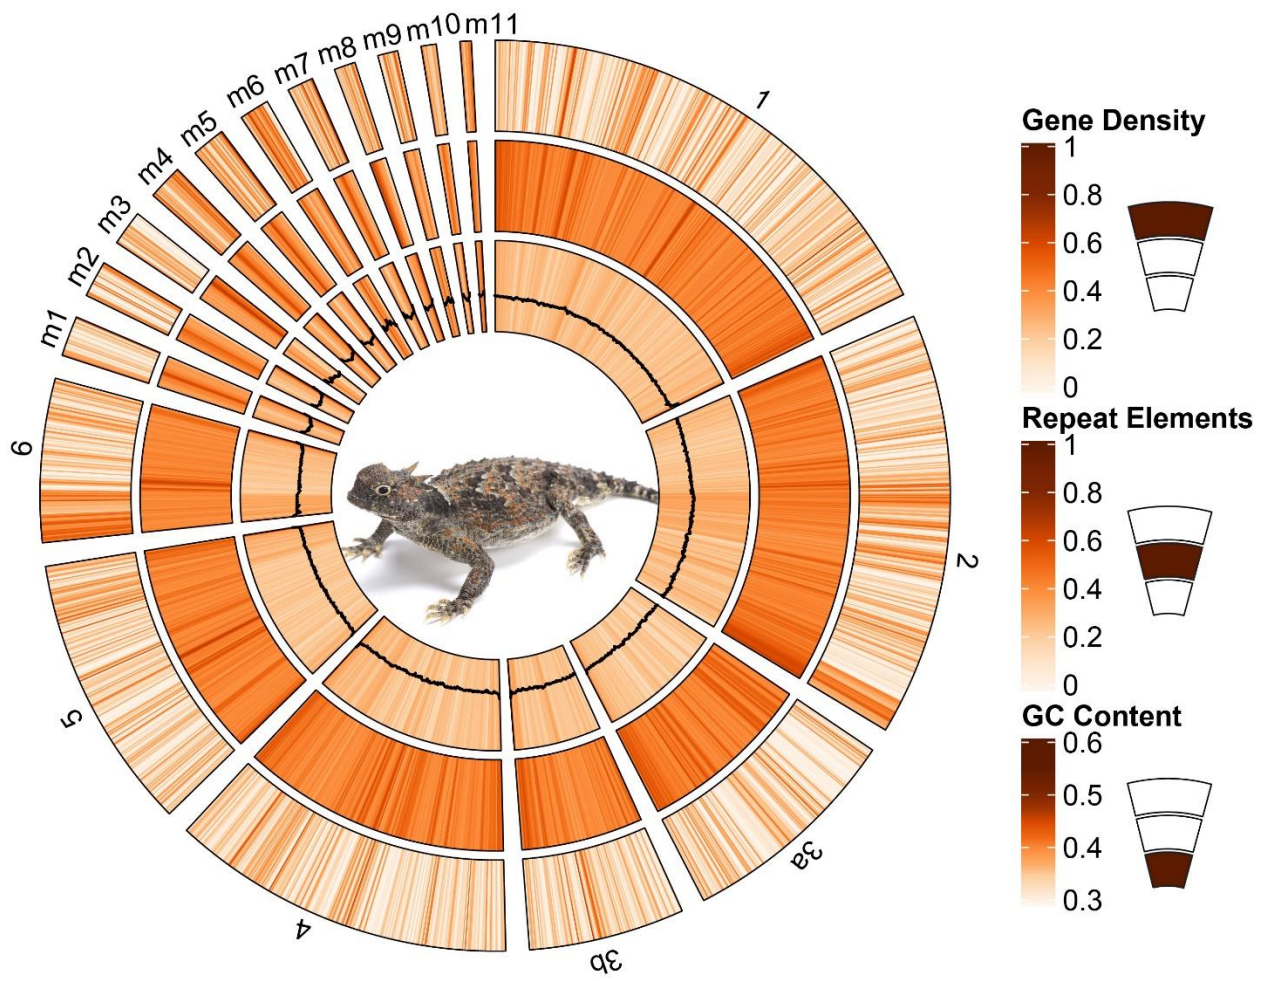

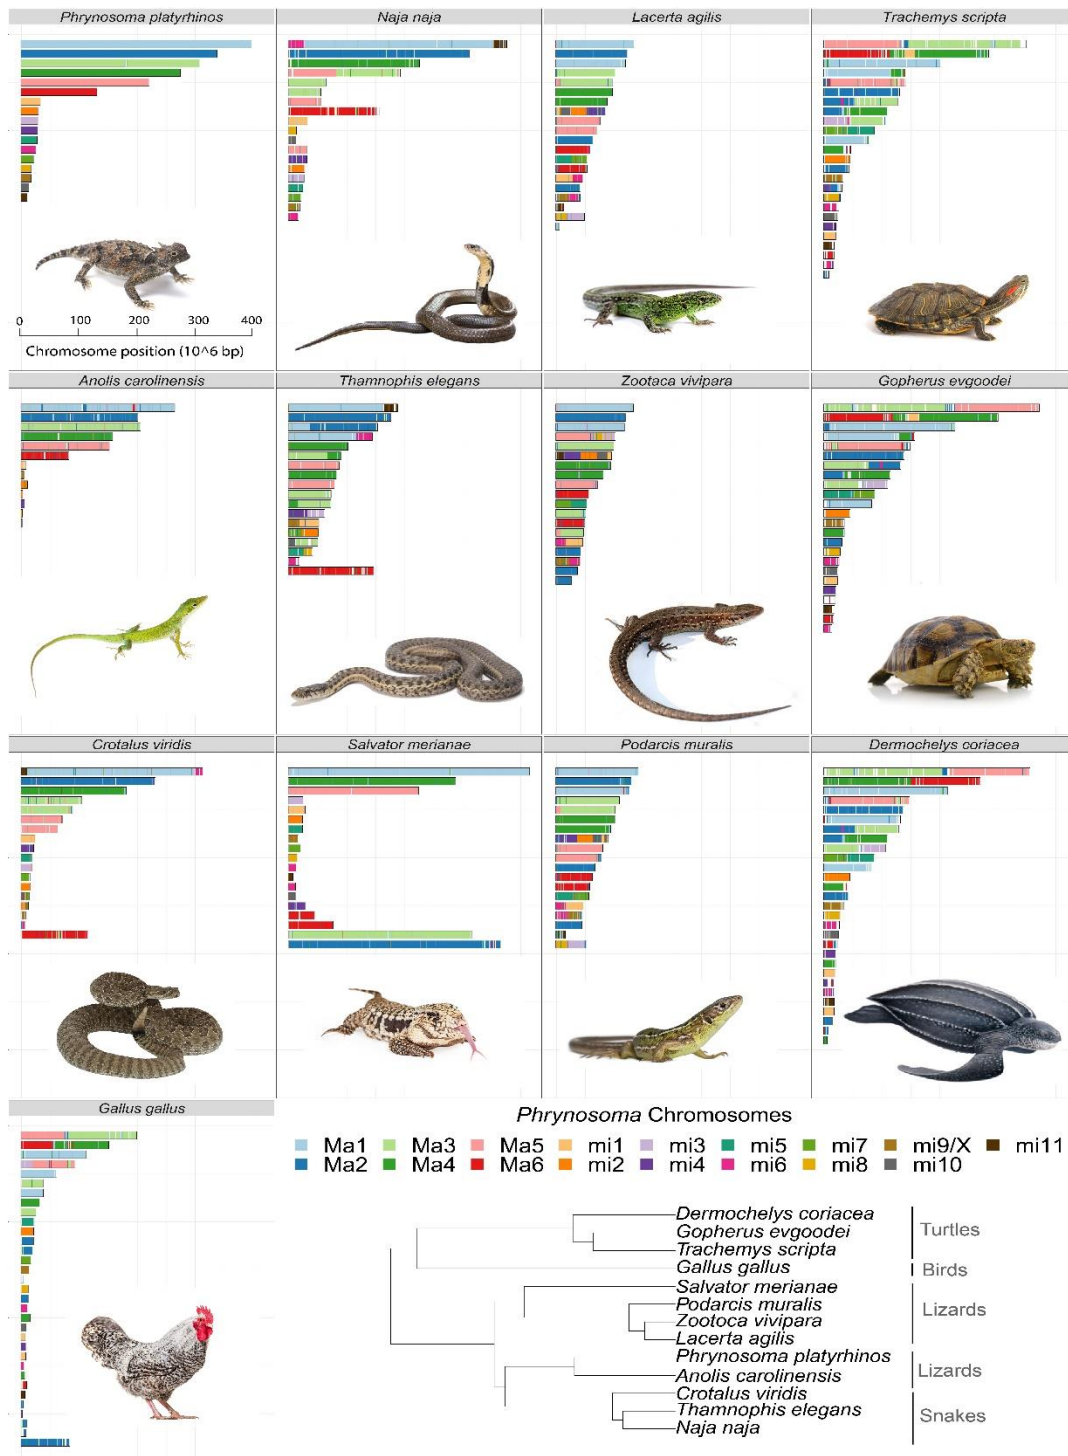

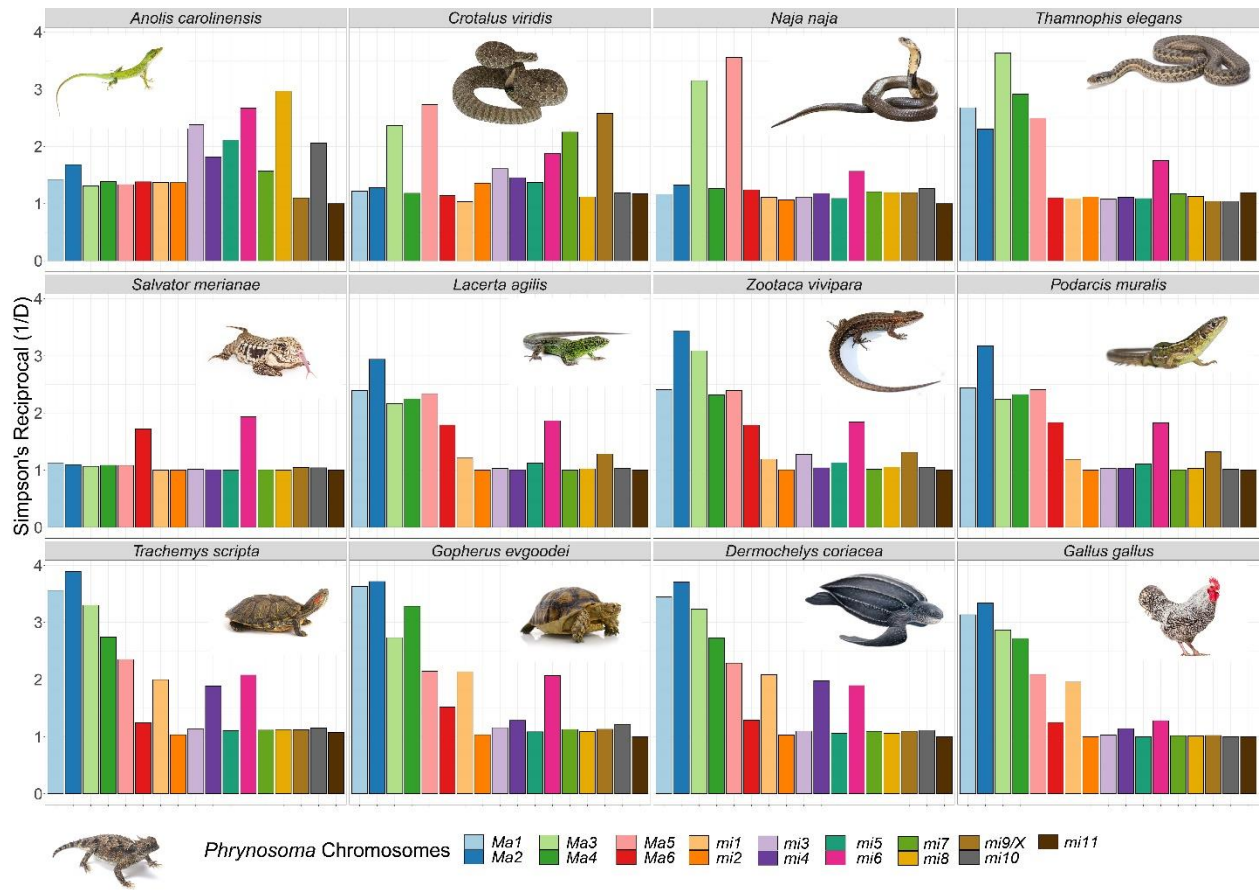

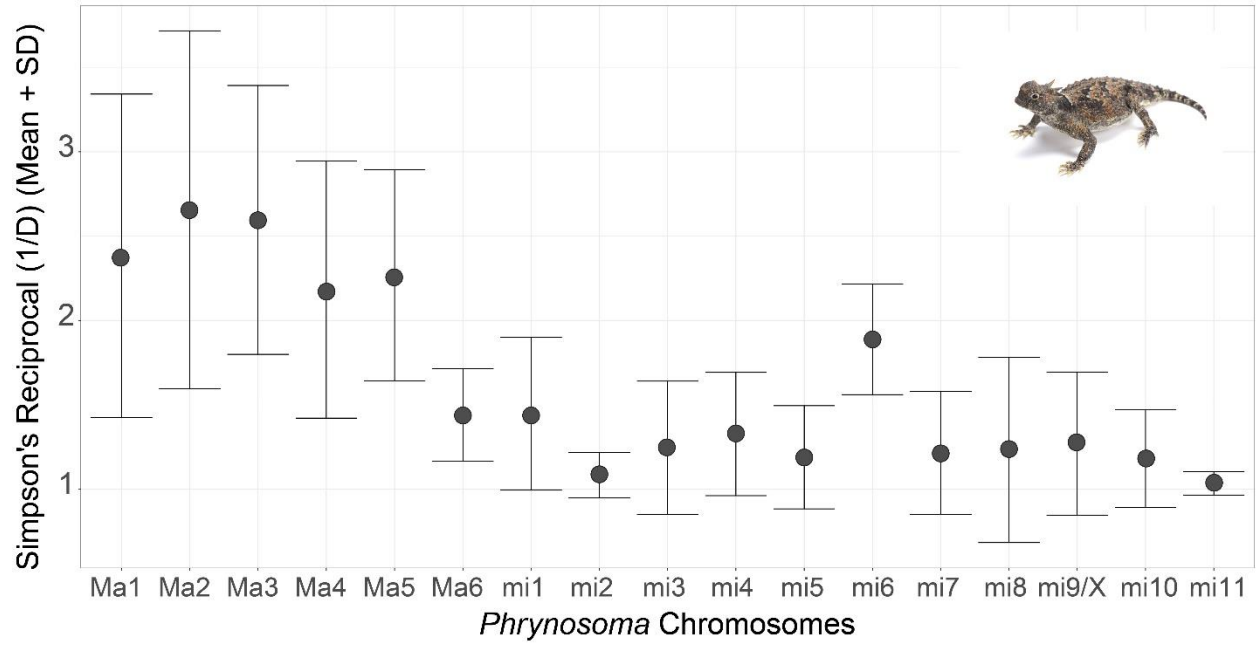



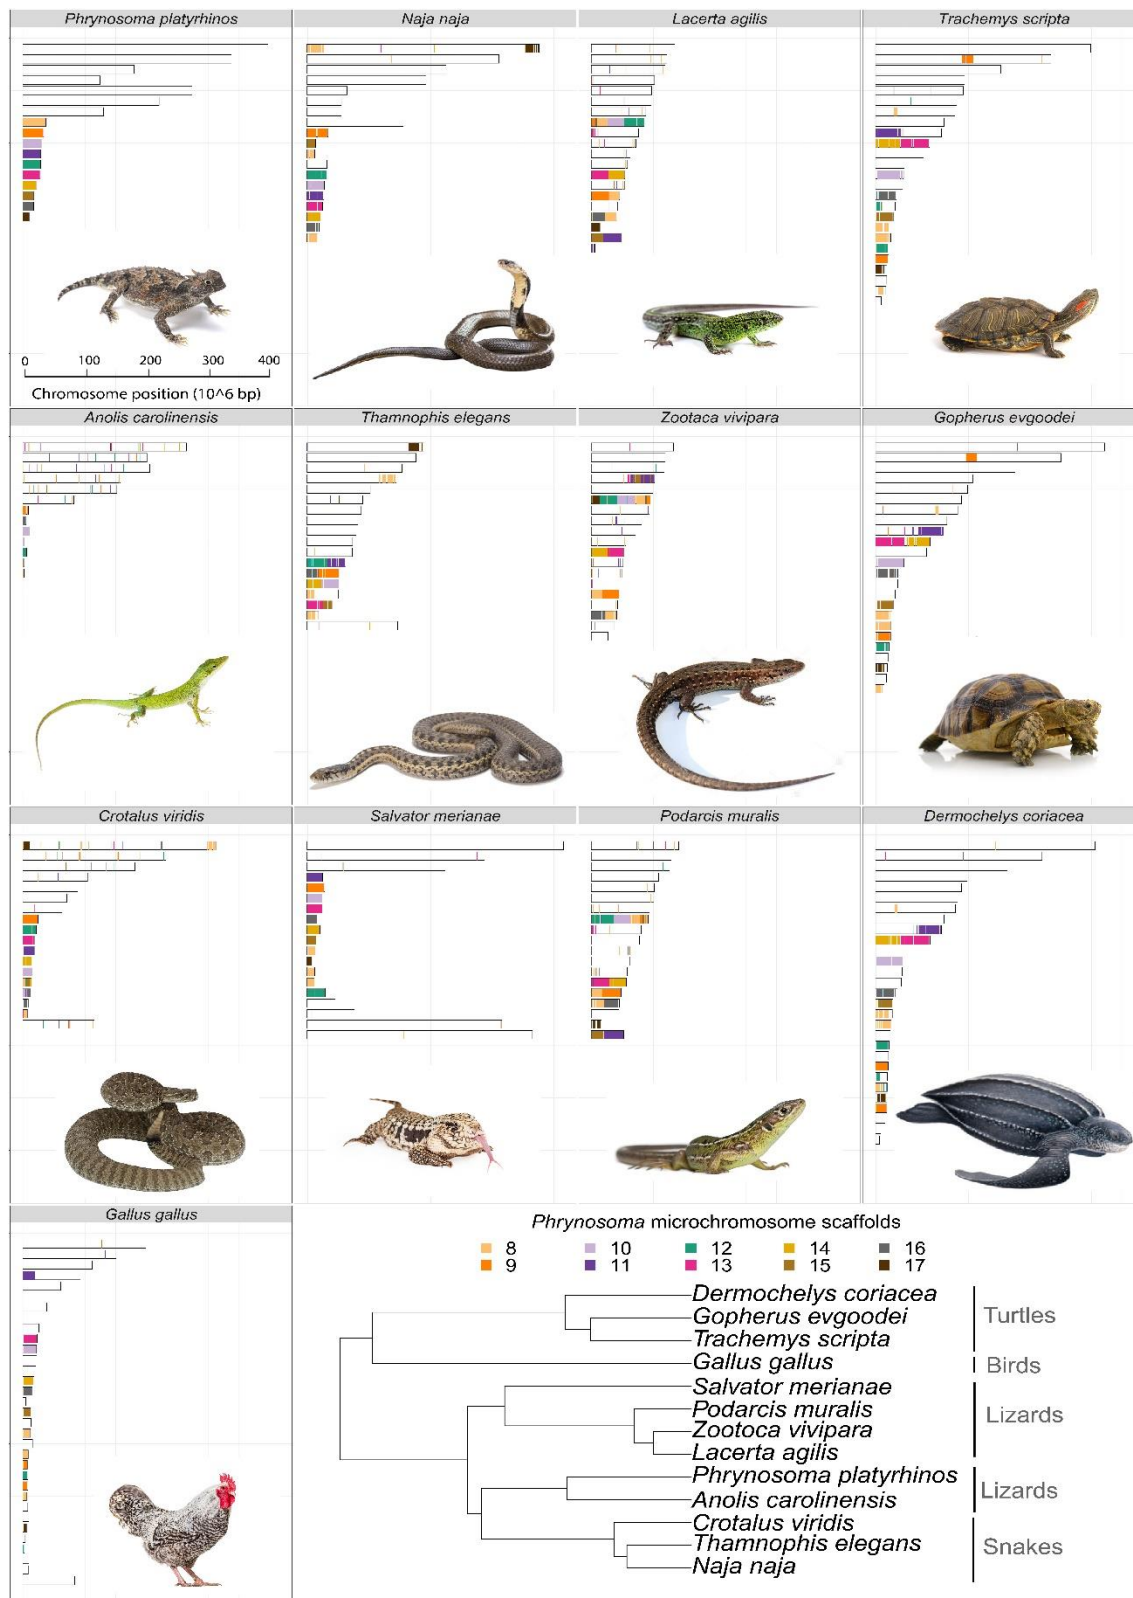

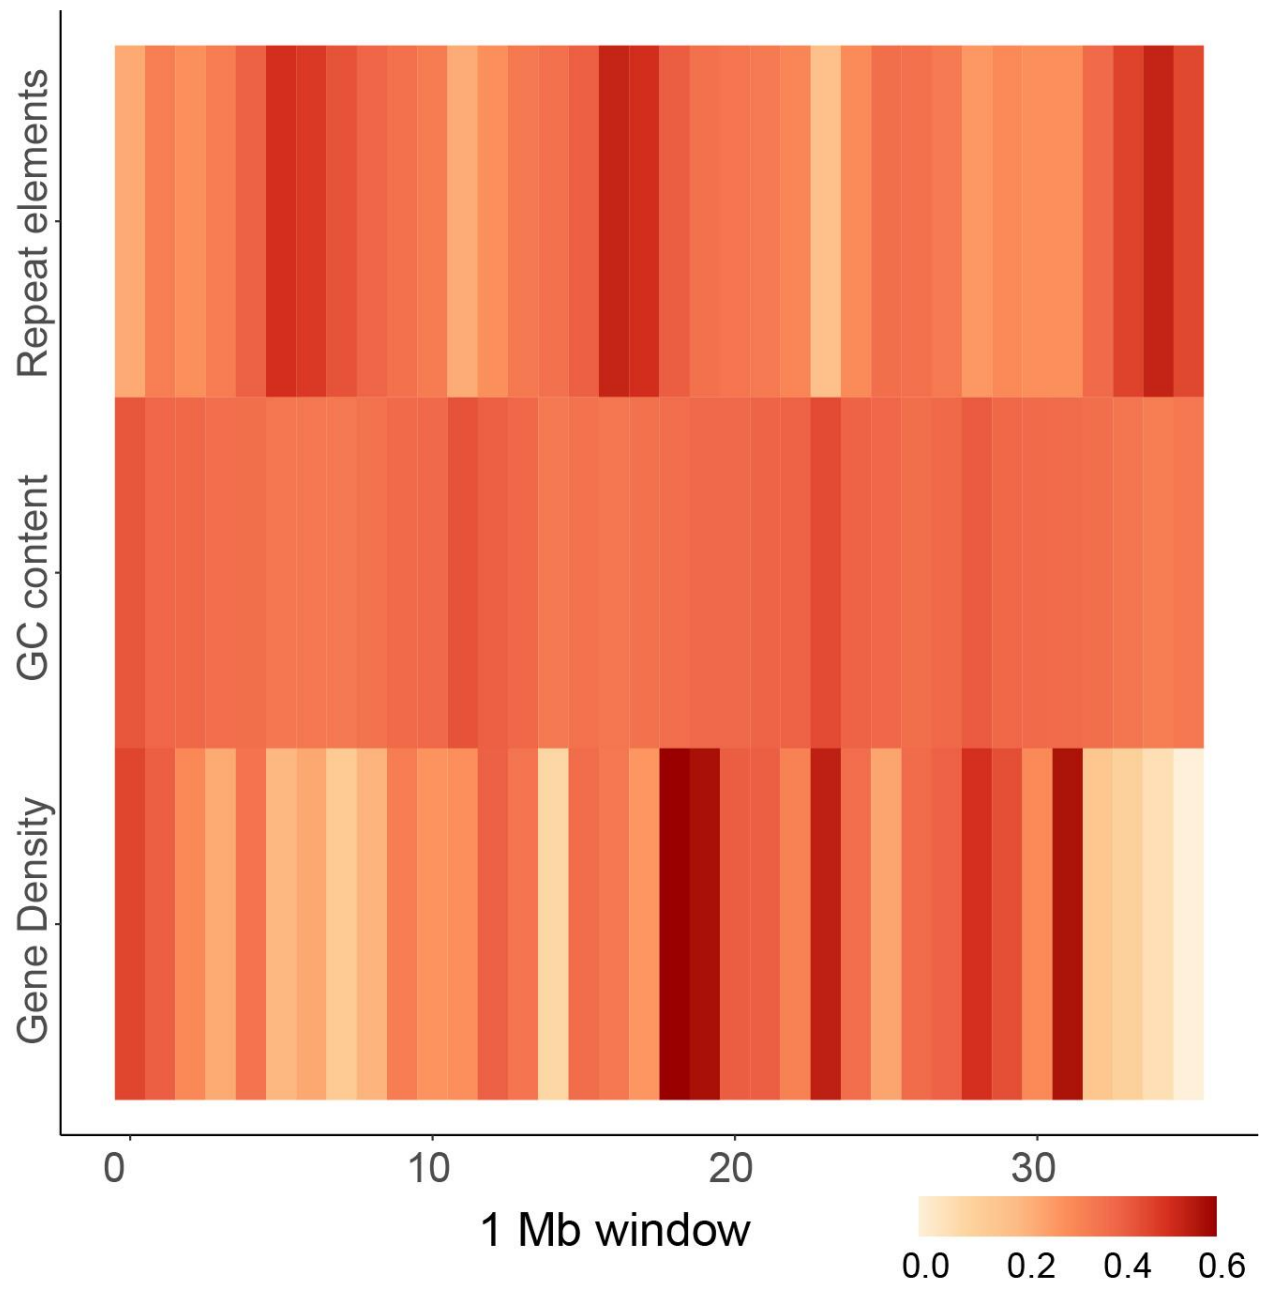

Supplement: giab098_giga-d-21-00044_original_submission.pdf [file giab098_giga-d-21-00044_original_submission.pdf]
