# Supplementary material for: A chromosome-level genome assembly and annotation of the desert horned lizard, Phrynosoma platyrhinos, provides insight into chromosomal rearrangements among reptiles
Source: PubMed Central journal article supplement (PMC8848323; doi:10.1093/gigascience/giab098), 2022-02-04

# GigaScience

## A chromosome-level genome assembly and annotation of the desert horned lizard, *Phrynosoma platyrhinos*, provides insight into chromosomal rearrangements among reptiles

--Manuscript Draft--

|                                                      |                                                                                                                                                                                                                                                                                                                                                                                                                                                                                                                                                                                                                                                                                                                                                                                                                                                                                                                                                                                                                                                                                                                                                                                                                                                                                                                                                                                                                                                                                                                                                                                                                                                                                                                                                                                                                                                                                                                                                                                                         |                   |
|------------------------------------------------------|---------------------------------------------------------------------------------------------------------------------------------------------------------------------------------------------------------------------------------------------------------------------------------------------------------------------------------------------------------------------------------------------------------------------------------------------------------------------------------------------------------------------------------------------------------------------------------------------------------------------------------------------------------------------------------------------------------------------------------------------------------------------------------------------------------------------------------------------------------------------------------------------------------------------------------------------------------------------------------------------------------------------------------------------------------------------------------------------------------------------------------------------------------------------------------------------------------------------------------------------------------------------------------------------------------------------------------------------------------------------------------------------------------------------------------------------------------------------------------------------------------------------------------------------------------------------------------------------------------------------------------------------------------------------------------------------------------------------------------------------------------------------------------------------------------------------------------------------------------------------------------------------------------------------------------------------------------------------------------------------------------|-------------------|
| <b>Manuscript Number:</b>                            | GIGA-D-21-00044R1                                                                                                                                                                                                                                                                                                                                                                                                                                                                                                                                                                                                                                                                                                                                                                                                                                                                                                                                                                                                                                                                                                                                                                                                                                                                                                                                                                                                                                                                                                                                                                                                                                                                                                                                                                                                                                                                                                                                                                                       |                   |
| <b>Full Title:</b>                                   | A chromosome-level genome assembly and annotation of the desert horned lizard, <i>Phrynosoma platyrhinos</i> , provides insight into chromosomal rearrangements among reptiles                                                                                                                                                                                                                                                                                                                                                                                                                                                                                                                                                                                                                                                                                                                                                                                                                                                                                                                                                                                                                                                                                                                                                                                                                                                                                                                                                                                                                                                                                                                                                                                                                                                                                                                                                                                                                          |                   |
| <b>Article Type:</b>                                 | Research                                                                                                                                                                                                                                                                                                                                                                                                                                                                                                                                                                                                                                                                                                                                                                                                                                                                                                                                                                                                                                                                                                                                                                                                                                                                                                                                                                                                                                                                                                                                                                                                                                                                                                                                                                                                                                                                                                                                                                                                |                   |
| <b>Funding Information:</b>                          | Miami University                                                                                                                                                                                                                                                                                                                                                                                                                                                                                                                                                                                                                                                                                                                                                                                                                                                                                                                                                                                                                                                                                                                                                                                                                                                                                                                                                                                                                                                                                                                                                                                                                                                                                                                                                                                                                                                                                                                                                                                        | Dr Tereza Jezkova |
|                                                      | National Science Foundation Graduate Research Fellowship Program (2037786)                                                                                                                                                                                                                                                                                                                                                                                                                                                                                                                                                                                                                                                                                                                                                                                                                                                                                                                                                                                                                                                                                                                                                                                                                                                                                                                                                                                                                                                                                                                                                                                                                                                                                                                                                                                                                                                                                                                              | Mr Keaka Farleigh |
| <b>Abstract:</b>                                     | <p><b>Background</b> . The increasing number of chromosome-level genome assemblies has advanced our knowledge and understanding of macroevolutionary processes. Here, we introduce the genome of the desert horned lizard, <i>Phrynosoma platyrhinos</i>, an iguanid lizard occupying extreme desert conditions of the American southwest. We conduct analysis of the chromosomal structure and composition of this species and compare these features across genomes of 12 other reptiles (5 species of lizards, 3 snakes, 3 turtles, and 1 bird).</p> <p><b>Findings</b> . The desert horned lizard genome was sequenced using Illumina paired-end reads and assembled and scaffolded using Dovetail Genomics Hi-C and Chicago long-range contact data. The resulting genome assembly has a total length of 1,901.85 Mb, scaffold N50 length of 273.213 Mb, and includes 5,294 scaffolds. The chromosome-level assembly is composed of 6 macrochromosomes and 11 microchromosomes. A total of 20,764 genes were annotated in the assembly. GC content and gene density are higher for microchromosomes than macrochromosomes, while repeat element distributions show the opposite trend. Pathway analyses provide preliminary evidence that microchromosome and macrochromosome gene content are functionally distinct. Synteny analysis indicates that large microchromosome blocks are conserved among closely related species, whereas macrochromosomes show evidence of frequent fusion and fission events among reptiles, even between closely related species.</p> <p><b>Conclusions</b> : Our results demonstrate dynamic karyotypic evolution across Reptilia, with frequent inferred splits, fusions, and rearrangements that have resulted in shuffling of chromosomal blocks between macrochromosomes and microchromosomes. Our analyses also provide new evidence for distinct gene content and chromosomal structure between microchromosomes and macrochromosomes within reptiles.</p> |                   |
| <b>Corresponding Author:</b>                         | Nazila Koochekian<br>Miami University College of Arts and Science<br>Oxford, OH UNITED STATES                                                                                                                                                                                                                                                                                                                                                                                                                                                                                                                                                                                                                                                                                                                                                                                                                                                                                                                                                                                                                                                                                                                                                                                                                                                                                                                                                                                                                                                                                                                                                                                                                                                                                                                                                                                                                                                                                                           |                   |
| <b>Corresponding Author Secondary Information:</b>   |                                                                                                                                                                                                                                                                                                                                                                                                                                                                                                                                                                                                                                                                                                                                                                                                                                                                                                                                                                                                                                                                                                                                                                                                                                                                                                                                                                                                                                                                                                                                                                                                                                                                                                                                                                                                                                                                                                                                                                                                         |                   |
| <b>Corresponding Author's Institution:</b>           | Miami University College of Arts and Science                                                                                                                                                                                                                                                                                                                                                                                                                                                                                                                                                                                                                                                                                                                                                                                                                                                                                                                                                                                                                                                                                                                                                                                                                                                                                                                                                                                                                                                                                                                                                                                                                                                                                                                                                                                                                                                                                                                                                            |                   |
| <b>Corresponding Author's Secondary Institution:</b> |                                                                                                                                                                                                                                                                                                                                                                                                                                                                                                                                                                                                                                                                                                                                                                                                                                                                                                                                                                                                                                                                                                                                                                                                                                                                                                                                                                                                                                                                                                                                                                                                                                                                                                                                                                                                                                                                                                                                                                                                         |                   |
| <b>First Author:</b>                                 | Nazila Koochekian                                                                                                                                                                                                                                                                                                                                                                                                                                                                                                                                                                                                                                                                                                                                                                                                                                                                                                                                                                                                                                                                                                                                                                                                                                                                                                                                                                                                                                                                                                                                                                                                                                                                                                                                                                                                                                                                                                                                                                                       |                   |
| <b>First Author Secondary Information:</b>           |                                                                                                                                                                                                                                                                                                                                                                                                                                                                                                                                                                                                                                                                                                                                                                                                                                                                                                                                                                                                                                                                                                                                                                                                                                                                                                                                                                                                                                                                                                                                                                                                                                                                                                                                                                                                                                                                                                                                                                                                         |                   |
| <b>Order of Authors:</b>                             | Nazila Koochekian                                                                                                                                                                                                                                                                                                                                                                                                                                                                                                                                                                                                                                                                                                                                                                                                                                                                                                                                                                                                                                                                                                                                                                                                                                                                                                                                                                                                                                                                                                                                                                                                                                                                                                                                                                                                                                                                                                                                                                                       |                   |
|                                                      | Alfredo Ascanio                                                                                                                                                                                                                                                                                                                                                                                                                                                                                                                                                                                                                                                                                                                                                                                                                                                                                                                                                                                                                                                                                                                                                                                                                                                                                                                                                                                                                                                                                                                                                                                                                                                                                                                                                                                                                                                                                                                                                                                         |                   |
|                                                      | Keaka Farleigh                                                                                                                                                                                                                                                                                                                                                                                                                                                                                                                                                                                                                                                                                                                                                                                                                                                                                                                                                                                                                                                                                                                                                                                                                                                                                                                                                                                                                                                                                                                                                                                                                                                                                                                                                                                                                                                                                                                                                                                          |                   |
|                                                      | Daren C Card                                                                                                                                                                                                                                                                                                                                                                                                                                                                                                                                                                                                                                                                                                                                                                                                                                                                                                                                                                                                                                                                                                                                                                                                                                                                                                                                                                                                                                                                                                                                                                                                                                                                                                                                                                                                                                                                                                                                                                                            |                   |

|                                                |                                                                                                                                                                                                                                                                                                                                                                                                                                                                                                                                                                                                                                                                                                                                                                                                                                                                                                                                                                                                                                                                                                                                                                                                                                                                                                                                                                                                                                                                                                                                                                                                                                                                                                                                                                                                                                                                                                                                                                                                                                                                                                                                                                                                                                                                                                                                                                                                                                                                                                                                                                                                                                                                                                                                                                                                                                                                                                                                                                                                                                                                                                                                                                                                                                                                                                                                                                                                                                                                                                                                                                                                                                                                                                                                                                                                                                                                                                                                                                                                                                                                                                                                                                                                                                                                                                                                                   |
|------------------------------------------------|---------------------------------------------------------------------------------------------------------------------------------------------------------------------------------------------------------------------------------------------------------------------------------------------------------------------------------------------------------------------------------------------------------------------------------------------------------------------------------------------------------------------------------------------------------------------------------------------------------------------------------------------------------------------------------------------------------------------------------------------------------------------------------------------------------------------------------------------------------------------------------------------------------------------------------------------------------------------------------------------------------------------------------------------------------------------------------------------------------------------------------------------------------------------------------------------------------------------------------------------------------------------------------------------------------------------------------------------------------------------------------------------------------------------------------------------------------------------------------------------------------------------------------------------------------------------------------------------------------------------------------------------------------------------------------------------------------------------------------------------------------------------------------------------------------------------------------------------------------------------------------------------------------------------------------------------------------------------------------------------------------------------------------------------------------------------------------------------------------------------------------------------------------------------------------------------------------------------------------------------------------------------------------------------------------------------------------------------------------------------------------------------------------------------------------------------------------------------------------------------------------------------------------------------------------------------------------------------------------------------------------------------------------------------------------------------------------------------------------------------------------------------------------------------------------------------------------------------------------------------------------------------------------------------------------------------------------------------------------------------------------------------------------------------------------------------------------------------------------------------------------------------------------------------------------------------------------------------------------------------------------------------------------------------------------------------------------------------------------------------------------------------------------------------------------------------------------------------------------------------------------------------------------------------------------------------------------------------------------------------------------------------------------------------------------------------------------------------------------------------------------------------------------------------------------------------------------------------------------------------------------------------------------------------------------------------------------------------------------------------------------------------------------------------------------------------------------------------------------------------------------------------------------------------------------------------------------------------------------------------------------------------------------------------------------------------------------------------------|
|                                                | Drew R Schield                                                                                                                                                                                                                                                                                                                                                                                                                                                                                                                                                                                                                                                                                                                                                                                                                                                                                                                                                                                                                                                                                                                                                                                                                                                                                                                                                                                                                                                                                                                                                                                                                                                                                                                                                                                                                                                                                                                                                                                                                                                                                                                                                                                                                                                                                                                                                                                                                                                                                                                                                                                                                                                                                                                                                                                                                                                                                                                                                                                                                                                                                                                                                                                                                                                                                                                                                                                                                                                                                                                                                                                                                                                                                                                                                                                                                                                                                                                                                                                                                                                                                                                                                                                                                                                                                                                                    |
|                                                | Todd A Castoe                                                                                                                                                                                                                                                                                                                                                                                                                                                                                                                                                                                                                                                                                                                                                                                                                                                                                                                                                                                                                                                                                                                                                                                                                                                                                                                                                                                                                                                                                                                                                                                                                                                                                                                                                                                                                                                                                                                                                                                                                                                                                                                                                                                                                                                                                                                                                                                                                                                                                                                                                                                                                                                                                                                                                                                                                                                                                                                                                                                                                                                                                                                                                                                                                                                                                                                                                                                                                                                                                                                                                                                                                                                                                                                                                                                                                                                                                                                                                                                                                                                                                                                                                                                                                                                                                                                                     |
|                                                | Tereza Jezkova                                                                                                                                                                                                                                                                                                                                                                                                                                                                                                                                                                                                                                                                                                                                                                                                                                                                                                                                                                                                                                                                                                                                                                                                                                                                                                                                                                                                                                                                                                                                                                                                                                                                                                                                                                                                                                                                                                                                                                                                                                                                                                                                                                                                                                                                                                                                                                                                                                                                                                                                                                                                                                                                                                                                                                                                                                                                                                                                                                                                                                                                                                                                                                                                                                                                                                                                                                                                                                                                                                                                                                                                                                                                                                                                                                                                                                                                                                                                                                                                                                                                                                                                                                                                                                                                                                                                    |
| <b>Order of Authors Secondary Information:</b> |                                                                                                                                                                                                                                                                                                                                                                                                                                                                                                                                                                                                                                                                                                                                                                                                                                                                                                                                                                                                                                                                                                                                                                                                                                                                                                                                                                                                                                                                                                                                                                                                                                                                                                                                                                                                                                                                                                                                                                                                                                                                                                                                                                                                                                                                                                                                                                                                                                                                                                                                                                                                                                                                                                                                                                                                                                                                                                                                                                                                                                                                                                                                                                                                                                                                                                                                                                                                                                                                                                                                                                                                                                                                                                                                                                                                                                                                                                                                                                                                                                                                                                                                                                                                                                                                                                                                                   |
| <b>Response to Reviewers:</b>                  | <p>GIGA-D-21-00044</p> <p>A chromosome-level genome assembly and annotation of the Desert Horned Lizard, <i>Phrynosoma platyrhinos</i>, provides insight into chromosomal rearrangements among reptiles</p> <p>Nazila Koochekian, M.S.; Alfredo Ascanio; Keaka Farleigh; Daren C Card; Drew R Schield; Todd A Castoe; Tereza Jezkova</p> <p>GigaScience</p> <p>Reviewer reports:</p> <p>Reviewer #1: Authors present the chromosome level genome assembly of the desert horned lizard. They have used Chicago and HiC libraries to construct the genome assembly, which is used for exploratory analyses of chromosomal conservation patterns and describe properties of microchromosomes compositions (repeat, gene and GC%). The manuscript requires substantial revision and report plenty of details that are missing in methods section.</p> <p>General comments:</p> <p>I had difficulty following the manuscript given the substantial number of technical details were lacking. Broadly, large number of conclusions seemed to be derived from visual observations of figures and graphs without quantitative analyses to back those claims. I also noticed that there were sections in discussions that could be transferred to results (analyses) section. I also found repetitive content in discussions and analyses section. Overall, the manuscript writing style was not up to the level expected of a scientific descriptive paper. Major revision in style of writing is essential to ensure completeness and accuracy of information for readers.</p> <p>*** All coauthors have re-edited the MS to improve clarity, writing quality, and flow. We added details to the methodology (such as assembly and chromosome identification) and revised the writing to reduce repetitive statements. Additionally, because Figures 4 and 5 are used to visualize results from Simpson's Reciprocal analysis, we revised our results and discussion to explain this analysis.</p> <p>Karyotype for the desert horned lizard is assumed from previous study, but not substantiated. Generally, it is OK. However, at least mentioning this in discussion and how those assumptions can have implications in understanding homology are not discussed. Similarly, the quality of the assembly is not verified by any orthogonal method and therefore some of the claims in the manuscript may be wrong. I would encourage authors to discuss their results in the context of the quality of the assembly.</p> <p>*** We have now provided additional citations (27 and 28) showing that the karyotype of the desert horned lizard has been previously estimated by multiple studies. Therefore, we did not re-substantiate this result. We have now also made it clearer that our assembly assumes this karyotype is correct (line 111-113). We have increased discussion in the text about genome assembly, and inferences we made to assign chromosomes to scaffolds. However, we do politely disagree that we have not provided any orthogonal methods to compare our assembly – we have indeed conducted detailed synteny analysis (that shows a great degree of synteny with our genome and others), we have assessed genome completeness and quality in a number of ways (N50 contiguity metrics and BUSCO analyses), and we have shown that except for a small number of minor areas, our independent genome assembly was nearly a perfect match to expectations from multiple previous karyotype studies – all of these orthogonal comparisons are now more clearly pointed out in the text.</p> <p>One of the major points I would like to raise is about the use of genome assemblies that Vertebrate Genome Project (Genome 10K) have generated for this kind of global analyses work. They have an embargo on the use of data as per documentation at <a href="https://genome10k.soe.ucsc.edu/data-use-policies/">https://genome10k.soe.ucsc.edu/data-use-policies/</a>. First, I would like to state that, I am not a member of any of the Genome10K, VGP or other associated projects. The embargo on data use is protected by the Fort Lauderdale Agreement (<a href="https://www.genome.gov/Pages/Research/WellcomeReport0303.pdf">https://www.genome.gov/Pages/Research/WellcomeReport0303.pdf</a>). Please refer to</p> |

the page 4, section C. "Resource Users" (points 2 and 3) as a shared responsibility by end users of the data. I personally prefer that the Fort Lauderdale Agreement be revised in the interest of research because embargo periods are substantially larger compared to the pace of data production these days. However, we collectively as scientists need to bring this change together in the interest of advancing science fairly for all. I leave it up to authors, journal and the editors to make the judgement call on the use of data that is under embargo.

\*\*\* We are aware of the embargo, but we do not conduct any comprehensive analyses of their data except for comparative purposes for the genome we published. It is therefore our understanding that we are in compliance with the Fort Lauderdale Agreement. One of the co-authors is on the Executive Council of the G10k group and they agree that this study does not violate the Ft Lauderdale Agreement from the perspective of their experience with the G10k group.

Specific comments:

Below I provide a list of specific comments.

Title: Please change common name to lower case.

\*\*\* Done.

Introduction:

1. Page 3, Line 59-60: Either use average for both or range for both to be consistent  
\*\*\* We chose range for both (lines 66-68).

2. Line 77: Convention is to say "ZW sex chromosome". Perhaps authors can change if they wish.

\*\*\* Changed it to "Z and W sex chromosomes" (line 85).

Analysis:

1. Line 109: Mean 0.18. The metric for gene density is unclear. Is it per Mb, or per 100Kb? Also, you have GC on the same fractional scale. Perhaps best to report GC as percentage as it is the widely accepted unit and gene content per Mb (or some other fixed scale). Same is the case for repeat content. Please specify the scales appropriately. Repeats being variable in size as units, perhaps report it as a proportion of the "chromosome" length.

\*\*\* Metrics for gene density are per Mb now and GC and repeat elements scales are percent. We now clarify this in the manuscript (lines 145-151).

2. Line 111:112: "elements identified 44.5%" is unclear. Is it that of all repeats, 44.5% repeats were identified and rest 55.5% missing from annotation? Or alternately and probably the case that 44.5% of the genome is composed of repeat elements.

\*\*\* The latter is the case, and we rephrased the sentence to make this clear in the revised manuscript (line 140-141).

3. Line 113: If repeat content is compared for macro vs micro, the results don't seem to be significant considering the SD of 0.056 for the macro.  $0.45 - 3 \times 0.056$  is 0.28, lower than the 0.39 for micro. Differences are not significant I guess on this scale.

\*\*\* We redid our statistical analysis using a non-parametric approach, Wilcoxon tests, because the distribution of these variables is highly skewed, and results show these variables are statistically different between macro and microchromosomes (lines 152-155).

4. GO analyses is not performed using statistics. Mere assignments to GO terms is a stretch. Statistical test is not listed. Perhaps authors should list the test.

\*\*\* We have updated our functional analysis and used pathways instead of GO terms to make comparisons of present/absent pathways on each group of chromosomes (lines 157-172).

5. Line 178 - 181: Please provide information about what chromosome numbers are you talking about here. It is very difficult to read figures with large number of chromosomes and colors.

\*\*\* We agree that there is a lot of information in this figure and in this paragraph. We were trying to move from closest species (lizards) to more distant ones (turtles). We now modified this paragraph (lines 198-208) for clarity and used a new figure (5b) to summarize the information from the previous figures.

Discussion:

1. Line 211: gBGC acronym is used only once. Please remove it.

\*\*\* Done.

2. Figure 2: What is the black line for in the inner circle? Circos plots are pleasant to look at but don't convey the message using the heatmaps in this figure. Perhaps

authors may consider redrawing this figure with a line plot using karyoploteR package in R (<https://www.bioconductor.org/packages/release/bioc/html/karyoploteR.html>).

\*\*\* Since the fluctuation in GC content is small, we had “the black line” to make it easier to follow the increase of GC content across scaffolds (e.g., at scaffold ends). We added heatmap figures in the supplemental information (Fig. S1) and deleted this black line to avoid confusion.

3. Line 214: I had difficulty in observing higher GC content pattern in subtelomeric regions. Authors must provide statistical calculations to show if the pattern is statistically significant or not. Otherwise, they should remove the reference to this discussion point.

\*\*\* We agree with the reviewer that a statistical test should be included to support this claim. The issue is that a length of subtelomeric regions has not been defined in the literature. We now adjusted the writing and are no longer make a strong claim about the difference in GC in subtelomeric regions versus elsewhere (lines 247-250).

4. Line 218 - 225 should be migrated to the analysis section.

\*\*\* Done (lines 232-234)

5. Line 236: regarding "several microchromosomes", please provide specific chromosome numbers and perhaps think about moving factual information you're your observations of the data into result section.

\*\*\* We used an alternative way of explaining synteny results (SR numbers) in the revised manuscript and tried to avoid repeating results in discussion section (lines 251-270). So accordingly, “several microchromosomes” is deleted, but we have taken care to report specific details in the remainder of the manuscript.

#### Methods:

1. Line 284: Ethics approval for the male for transcriptome sequencing is not mentioned. Please list it.

\*\*\* Done (lines 331-332).

2. Methods are very light on data and assembly generation. This requires major effort. Please see <https://academic.oup.com/g3journal/article/10/4/1159/6026169> for an example of how this section should be described. DNA extraction method, fragment size for library prep, read lengths targeted, paired vs single end mode for sequencing, sequencing platform (x10, hiseq2500, novaseq), library method in details.

\*\*\* Done (lines 286-338).

3. Genome and transcriptome assembly section: Methods are not very clear. It is mentioned that HiRise Scaffolding pipeline was used. No reference, no command line settings, availability of the software is listed.

\*\*\* We have modified this section of the manuscript to provide all relevant information on genome assembly, including details of software used and how such software was run (lines 319-327).

4. Line 293: Karyotype information is not clear. The paper cited states, "The ancestral  $2n = 34$  ( $12M + 20m + XY$ ) phrynosomatid karyotype that is found in several of the basal lineages of *Sceloporus* differs from the standard iguanian karyotype by the loss of a single pair of microchromosomes.

This to me suggests a karyotype of 6 macro and 10 micro-chromosomes including the sex chromosomes.

\*\*\* The cited section states that “The ancestral  $2n = 36$  ( $12M + 22m + XY$ ) karyotype for iguanian lizards is characterized by 6 pairs of bi-armed macrochromosomes and 12 pairs of micro-chromosomes (two of which are the sex chromosomes). The ancestral  $2n = 34$  ( $12M + 20m + XY$ ) phrynosomatid karyotype that is found in several of the basal lineages of *Sceloporus* differs from the standard iguanian karyotype by the loss of a single pair of microchromosomes.” So, it is explaining that iguanian karyotype is  $2n=36$  but phrynosomatid karyotype is different from iguanian with one pair less microchromosomes. So, it will be  $2n=34$  for Phrynosomatidae. We also provide additional citations for the chromosome number in Phrynosomatidae (27 and 28).

Also, the main thesis of the work is about variable karyotype configurations in reptiles. It would be good if authors discussed accuracy of this information. If karyotype cannot be produced, then authors can at least discuss this limitation.

\*\*\* The karyotype for *P. platyrhinos* has been studied before. We added more references to be clear that at the species has a karyotype of  $2n=34$ .

5. Line 296: "Best BLAST" needs to be elaborated clearly with version numbers of assemblies and annotations used for such analyses. Details of software and parameter settings need to be described.

\*\*\* Details for Best Blast version and command is now added. The genome accessions

for annotated genes used in this analysis are provided in Table S1.

6. Line 303: *S. Merianae* genome is used as a source of truth. However, that genome is fragmented as well with 4512 scaffolds. Therefore, the statement in the next line "For example, in *S. merianae*, three microchromosome account for this scaffold" cannot be robust. This leads to the fact that lines 306-308 cannot be trusted. If authors insist on splitting automatically generated scaffolds using manual curation, then the curation should be applied consistently across the genome and not at handpicked locations. This causes confusion for downstream use of the genome reference.

\*\*\* Our assembly results provided 5294 scaffolds but 16 of them were substantially longer (>8 Mbp), while the rest were 8 kbp or shorter. These patterns emerge in chromosome-level assemblies even though the total number of scaffolds can still number in the thousands, as most data will be assembled into a small number of very large scaffolds that approximately represent a chromosome while a small subset of data will remain largely unassembled in very short scaffolds/contigs. Therefore, scaffold number alone does not necessarily indicate that a genome assembly is more or less fragmented. Also, we only conduct manual curation when the karyotype indicates that the observed number of chromosome-length scaffolds is incorrect since these karyotype data are robust and more reliable than in silico assembly. So, we first used chromosomal gene markers (table S1) to 1) identify chromosomes still apparently split across two or more scaffolds and 2) identify chromosomes where we should split sequences because the assembler incorrectly assembled these together. As a result, 6 macrochromosomes were clearly identified (assigned to 7 scaffolds). In microchromosomes, we observed patterns that indicated that the assembler incorrectly assembled multiple microchromosomes together. For these scaffolds, we used a previously published "full evidence" approach to manually identify breakpoints to split these microchromosomes, which is now described in detail in the revised manuscript (lines 351-368).

7. Line 310: How was this performed?

\*\*\* To assign 10 scaffolds to 11 microchromosomes, we used several sources of information. First, chromosomal gene markers from *Anolis carolinensis* identified 4 of our original scaffolds as microchromosomes. One of these microchromosome scaffolds was noticeably larger than the others and preliminary synteny analyses indicated that this large microchromosome matched several distinct microchromosomes in all other species with microchromosomes used in our analysis (an example based on *Salvator merianae* is provided in the text). These two sources of information strongly suggested that multiple microchromosomes had been incorrectly scaffolded together due to Hi-C data, which has been observed in at least one previous study (Schield et al. 2019). Given this, we used the approach of Schield et al. (2019) to identify candidate breakpoints between microchromosome scaffolds using our Chicago data. For each candidate breakpoint, we used a "full evidence" approach to assess local measures of GC content, repeat density, and gene density to determine whether the scaffold should be split at this breakpoint. This approach allowed us to reliably split the large microchromosome scaffold into two distinct microchromosome scaffolds, which results in a microchromosome count that aligns with karyotypic data. We now clarify this method in greater detail in the manuscript (lines 351-368).

8. Line 316: Replace "unknown" with "novel".

\*\*\* We disagree with this point and have not made this edit because the accepted convention is to call these un-classified repeats "unknown" based on how RepeatModeler outputs are structured; this convention follows multiple previous genomes that have been published. Novel suggests that repeats are 'new to science', which has not been rigorously evaluated and is not the intended meaning.

9. Line 349: The RBB pipeline is nowhere described at the link provided as reference. The link only provides information about how to create annotation tracks. Please detail methods clearly.

\*\*\* We now provide a link for RBB that is called "orthorbb" (line 410).

10. Gene ontology section: Needs more detail about the software version, parameters, commands, and essential thresholds used to determine significance of enrichment or depletion.

\*\*\* Software version was added (line 415). Although the analysis is replaced by pathway analysis, the software is same as the previous one (PANTHER). Also, this software is browser-based and there is no parameters or command line that we used since we used their protocol for "gene list" using our genome annotation results. More details are added (lines 416-418)

11. Line 361-362: Please describe the command used to calculate GC content, gene



density, repeat elements etc. What were the sources of these annotations to be used with markwindows tool?

\*\*\* More details are added now (lines 424-430). Also, the script for GC content has been already published so we provide a link to it. A script for calculating repeat and gene density has been submitted to GigaDB that is called "window\_quantify.py".

12. Line 363 - 367: Please list assembly version for posterity.

\*\*\*Done (lines 434-438).

13. Line 368: reference for painting method appears to be incorrect. Please provide accurate reference for the in-silico painting method.

\*\*\*The reference is correct, but the first author is not the person who has done the synteny analysis and wrote the painting script. We took out the name of the author for synteny script from the text to avoid the confusion (line 439).

14. Painting method requires substantial addition in how the BLAST was performed. What was the tool (blastn, megablast, dcmegablast) used? If default parameters used, then say so.

\*\*\*Done (line 441-445).

#### References:

1. Page, issue and volume numbers are present in some but not all references.

\*\*\* We have edited the references to be consistent with only page and volume information in the revised draft.

2. Remove letters next to the year. Perhaps something to do with the reference manager.

\*\*\*Done.

3. Reference 2, 11, 14, 20, 54 are examples of references without complete list of authors. Use consistent style.

\*\*\*Done.

4. Reference 18 has a typo for the species name. Please correct it.

\*\*\*Done (reference 20).

#### Reviewer #2:

This is a review of the manuscript entitled "A chromosome-level genome assembly and annotation of the Desert Horned Lizard, *Phrynosoma platyrhinos*, provides insight into chromosomal rearrangements among reptiles". This manuscript presents the genome assembly and annotation of the desert horned lizard. Besides providing these resources the authors conduct some analyses that bring insight into micro and macrochromosome evolution. They indicate that gene density seems higher on the microchromosomes, and microchromosomes are more conserved as blocks based on the synteny analysis. The use of an ecological statistics is a clever way for assessing chromosomal dispersion. Overall I think this manuscript a very useful contribution to the field, however, a number of areas in this manuscript need to be clarified and perhaps reevaluated, as described below. I hope the authors find these useful for improving their manuscript.

#### Major Points:

1. In general, the methods section needs more details, and since the Analysis section is presented first it needs to be sufficient for understanding how you arrived at your findings without having read the methods that are at the end of the manuscript. In many sections I had to read the Methods section alongside the Analysis section to understand the Analysis section.

\*\*\*We added brief methods to each section in analysis and more details are added in each section of methods.

2. Page 13, methods for breaking scaffold 8.

a. Can you further explain or provide references for why high GC, and low repeats would indicate a good break point. This is not intuitive in the context of telomeres at the end of chromosomes having high repeats of AT rich regions.

\*\*\* The reference for indicating the break point for misassembled microchromosomes scaffold is "The origins and evolution of chromosomes, dosage compensation, and mechanisms underlying venom regulation in snakes, Schield and et. al, 2019". In their Dovetail/HiRise genome assembly they had one large scaffold that contained all microchromosomes, incorrectly merged. In this publication, the authors designed an approach for identifying putative chromosome-breaks within a Hi-C-based scaffold by

comparing this scaffold with chicken and Anole microchromosomes, together with comparisons of breakpoints between Chicago scaffolds (which cannot span multiple chromosomes). Then, synteny analysis was used to see if any breaks between synteny blocks are matched with Chicago scaffolds breakpoints. Finally, patterns of GC and repeat content were aligned to the overlapping evidence from synteny and Chicago scaffold breakpoints. Their results show that the breakpoints are matched with the shifts to higher GC content, lower repeat element density, and lower gene density, which were also observed near the ends of macrochromosomes in that analysis and in our analyses presented here. We followed this methodology to determine the putative breakpoint between the two *P. platyrhinos* microchromosomes, which we believe were also incorrectly over-assembled by the same Dovetail/HiRise assembly biases when it comes to Hi-C interpretation from microchromosomes.

b. For transparency, indicate on Figure 2 and Table 2 which microchromosomes derived from the scaffold 8 that was "broken".

\*\*\* We now provide this in Table S1. In Fig. 2, we now only show chromosomes as suggested by the reviewers.

c. Indicate on Supplemental Figure 1 where the scaffold was broken and label the ends with their respective microchromosome designations.

\*\*\* Done (Figure S3).

d. Why do you think these were put into the same scaffold? This information could be useful for others in trying to understand their assemblies

\*\*\* Based on previous studies (Perry and et. al. 2020, and Schield and et. al. 2019) microchromosomes may have a greater frequency of inter-chromosomal contact than expected in models used to scaffold based on Hi-C sequencing data (lines 356-359), thus introducing 'overassembly' of chromosomes into scaffolds. We clarified this in the methods for breaking this scaffold, and both of these cited papers describe this in further detail.

3. Scaffolds or Chromosomes: In Figure 2 it is confusing that the two scaffolds you think are chromosome 3 are separated, but scaffold 8 has been broken into the proposed macrochromosomes. I suggest you either use this figure to represent scaffolds with scaffolds for proposed chromosome 3a and 3b separated and the full scaffold 8 intact, OR you use this figure to represent proposed chromosomes with the two scaffolds representing proposed chromosome 3 together and the scaffold 8 broken to represent the proposed microchromosomes. Regardless, for transparency you should have both scaffold and chromosome labels around the circle.

\*\*\*We chose to have a chromosome level figure instead of scaffolds. The two scaffolds for chromosome 3 are attached together (called chromosome 3 instead of 3a and 3b). Microchromosomes are also presented as the final order. But we believe adding the scaffolds names to it makes it confusing. Also, we have Table S2 that relates all chromosomes to their reference scaffolds.

4. Gene Ontology. I think this is interesting but more details are needed on the GO Function analysis, and I suggest backing off on some conclusions or putting them in the context of the limitations of the study. For example, in the Annotation section it is mentioned that 20,764 protein coding genes were annotated, but in the gene ontology only ~11,000 (~1/2 were used). Why is this the case? Are they predicted proteins without gene "names". And then further only 7000 (1/3 of the annotated protein coding genes) were able to be assigned a molecular function.

\*\*\* Among all the genes we annotated in *P. platyrhinos* genome, about 16,000 were identified with homology-base analysis because we cannot always attach functional information to a gene model based on homology or other options, so these gene models remain "unknown" and cannot be used in downstream analyses of any kind. Among these identified gene IDs, 12,719 genes were identified by PANTHER (considering that repetitive genes on each chromosome count as one, 1,471 gene IDs in total were not identified). We added stacked bar charts (Fig. S2) to visualize these numbers which shows about 90% of annotated genes were identifiable on each group of chromosomes. We also updated our analysis with pathway that includes groups of genes involved in a specific functional group. We believe this analysis is more straightforward along with further explanation.

a. If you are only able to use 1/3 of the annotated genes in your analysis, how confident are you in these results when most of the data are missing?

\*\*\* We mentioned in the conclusion that these results are preliminary and require further investigation (lines 274-276).

b. Is this 1/3 of genes that can be included in your analytical tests evenly distributed

among the chromosomes? For example, are 1/3 of the annotated genes on chromosome 1 included in your test, and are 1/3 of the annotated genes on microchromosome 3 included in your test? OR are these proportions very different across the chromosomes? If they are different what bias does that introduce in this test?

\*\*\* We estimated how many genes are annotated with pathway analysis on each individual chromosome and visualized it in Fig. S2 which showed the proportion of annotated genes are roughly the same on each chromosome and more than 80% of each chromosome genes are included in the analysis.

c. What statistical model was used for testing for different molecular functions associated with the micro vs macrochromosomes? How many tests were completed: 8 level 1, 42 level 2, 142 level 3 = 192 statistical tests? Was a false discovery rate used in determining statistical significance?

\*\*\*Molecular function analysis is replaced with pathway analysis and absent/present of the pathways is compared.

d. Table S3 needs to have the adjusted P-values or FDR for statistical significance included as a column.

\*\*\*This table is replaced with a summary table for new functional analysis.

e. Clarify how the "activating / positive regulatory" and "repressive/negative regulatory" roles are being defined?

\*\*\*This section is deleted because of an updated analysis.

5. Page 6, Synteny analysis. It seems circular to say *A. carolinensis* had the same macrochromosome structure when you used genes from *A. carolinensis* to define the *P. platyrhinos* macrochromosomes (including the 3a and 3b). If you disagree, please explain to me and other readers why this would not be the case.

\*\*\*The gene markers for chromosome identification are based on a limited number of genes (25 from *A. carolinensis*) for all chromosomes (Table S2) but for synteny analysis we aligned both genome assemblies against each other and got more than 57,000 markers for *A. carolinensis* (Table S5) that were used in this analysis, which is comparing chromosomes in terms of "synteny blocks". So, this analysis is based on conservative blocks of sequences, not names of genes.

6. Metrics for quality of the assembly are needed. BUSCOs were run (in the online data) but the results not reported in the manuscript. Many BUSCOs are missing C:46.7%[S:46.2%,D:0.5%],F:7.2%,M:46.1%,n:5310

This is much more than I would expect if this is a high quality chromosome-level assembly. Why do you think this is? Was this run on the complete assembly or only the "chromosome" scaffolds? Include a description in the text of this BUSCO analysis and include a summary table of the BUSCO results. If there are other metrics you could use to further understand the quality of this assembly it would be encouraged.

\*\*\*A BUSCO table was added to the manuscript (Table 2). The run was performed using the entire genome. We also updated the results in this revision of the manuscript (C:68.6%[S:68.0%,D:0.6%],F:12.9%,M:18.5%,n:5310). Using other metrics (line 334) such as contig N50 shows our data are short reads (relatively short N50), so we believe that gaps/misassemblies lead to missing BUSCOs.

Finer points.

1. Page 13: In methods define the best blast parameters.

\*\*\*We added a link to the script was used (line 410).

2. Synteny Figures: the phylogeny lines are very faint and didn't show up on a print out

\*\*\* We edited the lines.

3. Table 1: Percent of genome in gaps for Chicago + Hi-C assembly is missing. It is interesting there are MORE gaps in the Chicago + Hi-C Assembly. Why is this?

\*\*\*The percentage of gaps is added now. In general, we expected to see more gaps in the Chicago + Hi-C assembly than the Chicago or original assemblies alone, as the Hi-C data is used to scaffold contigs/scaffolds more. Whenever scaffolding occurs, gaps will be introduced, and the software cannot always fill these gaps.

4. Table 2, it seems this information could easily be incorporated into Figure 2.

\*\*\* We combined this table with the table the reviewer asked for in comment 8 (corresponding scaffolds; Table S1).

5. Table S1 could use a much better description. Is chromosome relative to Anole and Scaffold relative to *P. platyrhinos*? You have chromosome names rather than scaffold names, this is confusing because the terms are not interchangeable,



|                                                                                                                                                                                                                                                                                                                                                                                                                                    |                                                                                                                                                                                                                                                                                                                                                                                                                                                                                                                                                                                                                                                                                                                                                                                                                                                                                                                                                                                                                                                                                                                                                                                                                                                                                                                                                                                                                                                                                                                                                                                                                                                                                                                                                                                                                                                                                                                                                                                                                                                                                                                                                                                                                                                                                                                                                                                                                  |
|------------------------------------------------------------------------------------------------------------------------------------------------------------------------------------------------------------------------------------------------------------------------------------------------------------------------------------------------------------------------------------------------------------------------------------|------------------------------------------------------------------------------------------------------------------------------------------------------------------------------------------------------------------------------------------------------------------------------------------------------------------------------------------------------------------------------------------------------------------------------------------------------------------------------------------------------------------------------------------------------------------------------------------------------------------------------------------------------------------------------------------------------------------------------------------------------------------------------------------------------------------------------------------------------------------------------------------------------------------------------------------------------------------------------------------------------------------------------------------------------------------------------------------------------------------------------------------------------------------------------------------------------------------------------------------------------------------------------------------------------------------------------------------------------------------------------------------------------------------------------------------------------------------------------------------------------------------------------------------------------------------------------------------------------------------------------------------------------------------------------------------------------------------------------------------------------------------------------------------------------------------------------------------------------------------------------------------------------------------------------------------------------------------------------------------------------------------------------------------------------------------------------------------------------------------------------------------------------------------------------------------------------------------------------------------------------------------------------------------------------------------------------------------------------------------------------------------------------------------|
|                                                                                                                                                                                                                                                                                                                                                                                                                                    | <p>especially when you are combining and splitting scaffolds to "define" the proposed chromosomes.</p> <p>***We edited the chromosome column and added the species name (Table S2).</p> <p>6. Figure 3. Why are the chromosomes in some species not sorted by size, when they seem to be in all the other species - is this meaning full in some way?</p> <p>*** We used the order that the chromosomes were sorted in their assemblies, and we believe this way is easier for the readers to follow and check with Genbank if they are interested in a specific chromosome.</p> <p>7. Indicate that you concatenated the 3a and 3b in the synteny figure legends.</p> <p>*** Done for Figures 2, 3, and S1.</p> <p>8. Describe either in the text or in the readme, the organization of the final assembly. Are the scaffolds organized by size? What are the scaffold names that correspond to each chromosome (this could be included a table or a figure). If the scaffold containing the two microscosomes is still intact as a single scaffold, report the point at which you think it should be broken. That will be useful information for anyone wanting to use your assembly.</p> <p>***The scaffolds are organized based on their scaffold name/number (described in the readme). A table was added to the supplemental tables (Table S1) that shows corresponding scaffolds for each chromosome. We already broke down the scaffold and more details for breaking this scaffold is added (lines 353-369, and Fig. S3).</p> <p>9. Be sure to include a description for all the online files in the Read.me</p> <p>*** Done.</p> <p>--</p> <p>Please also take a moment to check our website at <a href="https://www.editorialmanager.com/giga/l.asp?i=85421&amp;l=PBWIF3YE">https://www.editorialmanager.com/giga/l.asp?i=85421&amp;l=PBWIF3YE</a> for any additional comments that were saved as attachments. Please note that as GigaScience has a policy of open peer review, you will be able to see the names of the reviewers.</p> <hr/> <p>In compliance with data protection regulations, you may request that we remove your personal registration details at any time. (Use the following URL: <a href="https://www.editorialmanager.com/giga/login.asp?a=r">https://www.editorialmanager.com/giga/login.asp?a=r</a>). Please contact the publication office if you have any questions.</p> |
| <b>Additional Information:</b>                                                                                                                                                                                                                                                                                                                                                                                                     |                                                                                                                                                                                                                                                                                                                                                                                                                                                                                                                                                                                                                                                                                                                                                                                                                                                                                                                                                                                                                                                                                                                                                                                                                                                                                                                                                                                                                                                                                                                                                                                                                                                                                                                                                                                                                                                                                                                                                                                                                                                                                                                                                                                                                                                                                                                                                                                                                  |
| <b>Question</b>                                                                                                                                                                                                                                                                                                                                                                                                                    | <b>Response</b>                                                                                                                                                                                                                                                                                                                                                                                                                                                                                                                                                                                                                                                                                                                                                                                                                                                                                                                                                                                                                                                                                                                                                                                                                                                                                                                                                                                                                                                                                                                                                                                                                                                                                                                                                                                                                                                                                                                                                                                                                                                                                                                                                                                                                                                                                                                                                                                                  |
| Are you submitting this manuscript to a special series or article collection?                                                                                                                                                                                                                                                                                                                                                      | No                                                                                                                                                                                                                                                                                                                                                                                                                                                                                                                                                                                                                                                                                                                                                                                                                                                                                                                                                                                                                                                                                                                                                                                                                                                                                                                                                                                                                                                                                                                                                                                                                                                                                                                                                                                                                                                                                                                                                                                                                                                                                                                                                                                                                                                                                                                                                                                                               |
| <p><b>Experimental design and statistics</b></p> <p>Full details of the experimental design and statistical methods used should be given in the Methods section, as detailed in our <a href="#">Minimum Standards Reporting Checklist</a>. Information essential to interpreting the data presented should be made available in the figure legends.</p> <p>Have you included all the information requested in your manuscript?</p> | Yes                                                                                                                                                                                                                                                                                                                                                                                                                                                                                                                                                                                                                                                                                                                                                                                                                                                                                                                                                                                                                                                                                                                                                                                                                                                                                                                                                                                                                                                                                                                                                                                                                                                                                                                                                                                                                                                                                                                                                                                                                                                                                                                                                                                                                                                                                                                                                                                                              |
| <b>Resources</b>                                                                                                                                                                                                                                                                                                                                                                                                                   | Yes                                                                                                                                                                                                                                                                                                                                                                                                                                                                                                                                                                                                                                                                                                                                                                                                                                                                                                                                                                                                                                                                                                                                                                                                                                                                                                                                                                                                                                                                                                                                                                                                                                                                                                                                                                                                                                                                                                                                                                                                                                                                                                                                                                                                                                                                                                                                                                                                              |

|                                                                                                                                                                                                                                                                                                                                                                                                                                                                                                                                                         |            |
|---------------------------------------------------------------------------------------------------------------------------------------------------------------------------------------------------------------------------------------------------------------------------------------------------------------------------------------------------------------------------------------------------------------------------------------------------------------------------------------------------------------------------------------------------------|------------|
| <p>A description of all resources used, including antibodies, cell lines, animals and software tools, with enough information to allow them to be uniquely identified, should be included in the Methods section. Authors are strongly encouraged to cite <a href="#">Research Resource Identifiers</a> (RRIDs) for antibodies, model organisms and tools, where possible.</p> <p>Have you included the information requested as detailed in our <a href="#">Minimum Standards Reporting Checklist</a>?</p>                                             |            |
| <p><b>Availability of data and materials</b></p> <p>All datasets and code on which the conclusions of the paper rely must be either included in your submission or deposited in <a href="#">publicly available repositories</a> (where available and ethically appropriate), referencing such data using a unique identifier in the references and in the “Availability of Data and Materials” section of your manuscript.</p> <p>Have you have met the above requirement as detailed in our <a href="#">Minimum Standards Reporting Checklist</a>?</p> | <p>Yes</p> |

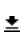

1 **A chromosome-level genome assembly and annotation of the desert horned**  
2 **lizard, *Phrynosoma platyrhinos*, provides insight into chromosomal**  
3 **rearrangements among reptiles**

4

5 Running title: genome of *P. platyrhinos*

6 Nazila Koochekian (\*Correspondence): Department of Biology, Miami University, Oxford, OH,  
7 45056, USA. Email: koochen@miamioh.edu

8 Alfredo Ascanio: Department of Biology, Miami University, Oxford, OH, 45056, USA. Email:  
9 ascaniaa@miamioh.edu

10 Keaka Farleigh: Department of Biology, Miami University, Oxford, OH, 45056, USA. Email:  
11 farleik@miamioh.edu

12 Daren C. Card: Department of Organismic & Evolutionary Biology, Harvard University,  
13 Cambridge, MA, 02138, USA, and Museum of Comparative Zoology, Harvard University,  
14 Cambridge, MA, 02138, USA. Email: dcard@fas.harvard.edu

15 Drew R. Schield: Department of Ecology and Evolutionary Biology, University of Colorado,  
16 Boulder, CO, 80309, USA. Email: Drew.Schild@colorado.edu

17 Todd A. Castoe: Department of Biology, University of Texas at Arlington, Arlington, TX, 76019,  
18 USA. Email: todd.castoe@uta.edu

19 Tereza Jezkova: Department of Biology, Miami University, Oxford, OH, 45056, USA. Email:  
20 jezkovt@miamioh.edu

21

22

23

24

## 25 Abstract

26 *Background.* The increasing number of chromosome-level genome assemblies has advanced  
27 our knowledge and understanding of macroevolutionary processes. Here, we introduce the  
28 genome of the desert horned lizard, *Phrynosoma platyrhinos*, an iguanid lizard occupying  
29 extreme desert conditions of the American southwest. We conduct analysis of the chromosomal  
30 structure and composition of this species and compare these features across genomes of 12  
31 other reptiles (5 species of lizards, 3 snakes, 3 turtles, and 1 bird).

32 *Findings.* The desert horned lizard genome was sequenced using Illumina paired-end reads and  
33 assembled and scaffolded using Dovetail Genomics Hi-C and Chicago long-range contact data.  
34 The resulting genome assembly has a total length of 1,901.85 Mb, scaffold N50 length of  
35 273.213 Mb, and includes 5,294 scaffolds. The chromosome-level assembly is composed of 6  
36 macrochromosomes and 11 microchromosomes. A total of 20,764 genes were annotated in the  
37 assembly. GC content and gene density are higher for microchromosomes than  
38 macrochromosomes, while repeat element distributions show the opposite trend. Pathway  
39 analyses provide preliminary evidence that microchromosome and macrochromosome gene  
40 content are functionally distinct. Synteny analysis indicates that large microchromosome blocks  
41 are conserved among closely related species, whereas macrochromosomes show evidence of  
42 frequent fusion and fission events among reptiles, even between closely related species.

43 *Conclusions:* Our results demonstrate dynamic karyotypic evolution across Reptilia, with  
44 frequent inferred splits, fusions, and rearrangements that have resulted in shuffling of  
45 chromosomal blocks between macrochromosomes and microchromosomes. Our analyses also  
46 provide new evidence for distinct gene content and chromosomal structure between  
47 microchromosomes and macrochromosomes within reptiles.

48

49 **Key words:** microchromosome; macrochromosome; gene content; synteny; Reptilia

## 50 Background

51 The increasing number of available chromosome-level genome assemblies of non-  
52 traditional model organisms has advanced our understanding of genome evolution over large  
53 time scales, including intra- and inter-chromosomal rearrangements and karyotype evolution  
54 across amniote vertebrates. A major gap in our understanding of amniote genome structure,  
55 composition, and evolution has been due to the lack of representative reptilian genomes of high  
56 enough quality to compare chromosome composition and structure. From data that is available,  
57 reptiles (the clade of Sauropsida) appear to exhibit particularly high levels of karyotypic variation  
58 (Fig. 1)[1, 2]. Much of this karyotypic variation is apparently due to frequent merging, splitting,  
59 and rearrangements among chromosomes, resulting in varying numbers and sizes of  
60 chromosomes even among closely related taxa (Fig. 1). Unlike mammalian genomes which lack  
61 microchromosomes, most reptilian genomes contain both macrochromosomes and  
62 microchromosomes [3]. The condition of possessing both macro- and microchromosomes  
63 appears to represent an ancient ancestral state that spans 400–450 million years of  
64 evolutionary history, as microchromosomes are present in many ancient chordates, fish, and  
65 amphibians, and all amniote vertebrates except mammals and crocodylians [3].  
66 Microchromosomes are generally identified by their smaller size (50 Mb threshold in squamates  
67 [4]). In the chicken, for example, microchromosomes range from 3.5 to 23 Mb [5], compared to  
68 macrochromosomes which range from 40 to 250 Mb [6].

69 Although microchromosome organization in avian species is relatively conserved at a  
70 karyotypic level [7], microchromosomes of non-avian reptiles vary considerably in number and  
71 size [8], potentially due to relatively high recombination rates [9] that lead to higher rates of  
72 chromosomal rearrangement [3,10]. Despite being a promising system in which to study  
73 karyotypic evolution, relatively little is known about the genomic features of macrochromosomes  
74 and microchromosomes and how these features evolve across Reptilia [11]. Moreover,



75 microchromosomes appear structurally and functionally distinct from macrochromosomes [12],  
76 and a deeper characterization of these distinctions may improve our understanding of the  
77 functional and evolutionary significance of the presence/absence of microchromosomes, and  
78 the presence of genes on micro- versus macrochromosomes. Despite interest in the processes  
79 and patterns related to chromosome evolution in reptiles, progress has been limited by the  
80 availability of relatively few high-quality reptile genomes available for comparative study. In  
81 lizards, only five genomes are annotated and assembled at the level of chromosomes (i.e.,  
82 chromosome-size scaffolds that in many cases have been ascribed to specific chromosomes):  
83 the green anole, *Anolis carolinensis* with 6 chromosomes and 7 microchromosomal linkage  
84 groups [13], the viviparous lizard, *Zootoca vivipara* with 19 chromosomal linkage groups [14],  
85 the sand lizard, *Lacerta agilis* with 18 autosomes and Z and W sex chromosomes [15], the  
86 common wall lizard, *Podarcis muralis* with 18 autosomes and a Z sex chromosome [16], and the  
87 Argentine black and white tegu, *Salvator merianae*, with chromosome-scale scaffolds that have  
88 not been fully ascribed to specific chromosomes [17].

89         Here we present a new chromosome-level genome assembly of the desert horned lizard  
90 (*P. platyrhinos*) and use this genome to conduct comparative analysis of chromosome content  
91 and evolution across reptiles. This species is widely distributed across the southwestern deserts  
92 of north America, including some of the hottest and driest places on Earth (e.g. Death valley in  
93 the Mojave Desert; [18]) which makes it an attractive model organism to study adaptation to  
94 extreme thermal environments. We have annotated the genome assembly and assessed large-  
95 scale structure and composition of the genome across macrochromosomes and  
96 microchromosomes. Using this new resource, we conduct synteny analyses to explore major  
97 changes in genome organization by making comparisons with existing chromosome-level  
98 annotated genomes of other lizards (*A. carolinensis*, *S. merianae*, *L. agilis*, *Z. vivipara* and *P.*  
99 *muralis*), snakes (*Crotalus viridis* [19], *Thamnophis elegans* [20], and *Naja naja* [21]), a bird  
100 (*Gallus gallus* [22]), and turtles (*Trachemys scripta* [23], *Gopherus evgoodei* [24], and

101 *Dermochelys coriacea* [25]). Our findings reveal differences in structure and gene content of  
102 macrochromosomes and microchromosomes in *P. platyrhinos* and highlight numerous  
103 chromosomal rearrangements among reptiles.

## 104 Analysis

### 105 **Genome assembly, transcriptome assembly, and chromosome identification**

106 The genome of *P. platyrhinos* was sequenced at 21,053.74-fold physical coverage using  
107 the Dovetail Genomics HiRise™ [26] sequencing and assembly approach that combines a  
108 contig-level assembly produced from shotgun Illumina sequencing with long-range scaffolding  
109 data from Chicago and Hi-C library preparations (Table 1). The final assembly included 5,294  
110 total scaffolds, with 7 large scaffolds and 10 smaller scaffolds comprising 99.56% of the genome  
111 assembly. The known karyotype of the species is composed of 6 macrochromosomes and 11  
112 microchromosomes [27,28] and we assumed this karyotype when linking chromosomes to their  
113 representative assembly scaffolds. Using chromosome-linked gene markers from *A.*  
114 *carolinensis* and *Leiolepis reevesii* [29], the 7 largest scaffolds were assigned to  
115 macrochromosomes 1-6 (two scaffolds corresponded to the two arms of macrochromosome 3;  
116 Table S1 and Table S2). Ten smaller scaffolds were assigned to microchromosomes, and one  
117 of these scaffolds was manually split into two microchromosomes (Table S1). We followed  
118 previous studies [8] to infer the location of the putative split between chromosomes by  
119 combining evidence from physically-linked Chicago scaffolds that cannot span multiple  
120 chromosomes, repeat element and GC composition, and synteny with chromosomes of other  
121 species (see Methods).

122 The chromosome-linked gene markers used to identify chromosome scaffolds do not  
123 identify specific microchromosome numbers (Table S2), so we ordered the assembled *P.*  
124 *platyrhinos* microchromosomes by descending length and numbered them microchromosomes

125 1-11 (Table S1). Sex chromosomes are conserved across iguanid lizards [30] and we identified  
126 microchromosome 9 as the X chromosome in *P. platyrhinos* based on homology with X-linked  
127 markers in *A. carolinensis* (*ATP2A2*, *FZD10*, and *TMEM132D* [30]; Table S2).

128 RNA-sequencing of 8 tissues (liver, lungs, brain, muscle, testes, heart, eyes, and  
129 kidneys) was used to assemble the transcriptome of *P. platyrhinos* using Trinity r2014 0413p1  
130 [31]. The final transcriptome assembly contained 199,541 transcripts comprising 199,500  
131 Trinity-annotated genes, with an average length of 1,438 base pairs and an N50 length of 2,420  
132 bp.

### 133 **Genome annotation and chromosomal composition**

134 We annotated 20,764 protein-coding genes in the *P. platyrhinos* genome assembly  
135 (JAIPUX010000000) using the gene prediction software MAKER v. 2.31.10 [32] and gene  
136 predictions based on AUGUSTUS v. 3.2.3. [33]. Among the total annotated genes, 16,384  
137 genes were identified using searches against protein sequences in databases NCBI and  
138 Interpro [34]. We identified 4,324 complete and fragmented BUSCO markers in the *P.*  
139 *platyrhinos* genome annotation from the total 5,310 BUSCO markers present in the library  
140 “tetrapoda\_odb10.2019-11-20” (Table 2). Our repeat annotation identified 44.45% of the  
141 genome as repetitive elements (Table S3) using RepeatModeler v. 1.0.11 [35] and  
142 RepeatMasker v. 4.0.8 [36]. The major components of the genomic repeat content included  
143 simple sequence repeats (6.90%), as well as L2/CR1/Rex (6.88%), hobo-Activator (5.98%), and  
144 Tourist/Harbinger (4.90%) transposable element families (Table S3).

145 Chromosomal composition analyses indicate that overall gene density (GD) and GC-  
146 content tended to be lower on *P. platyrhinos* macrochromosomes (mean  $\pm$  sd GD =  $0.19 \pm 0.14$ ,  
147 median = 0.17 per Mb; mean  $\pm$  sd GC% =  $35.9 \pm 1.2\%$ , median = 35.9%) than  
148 microchromosomes (mean  $\pm$  sd GD =  $0.27 \pm 0.16$ , median = 0.29 per Mb; mean  $\pm$  sd GC% =  
149  $38.5 \pm 2.8\%$ , median = 38.2%; Fig. 2 and S1). Conversely, repeat elements density tended to

150 be higher on macrochromosomes (mean  $\pm$  sd = 44.6  $\pm$  5.6%, median = 43.3% per Mb) than  
151 microchromosomes (mean = 39.4  $\pm$  10%, median = 38.1% per Mb; Fig. 2 and S1). These  
152 differences in GD, GC-content, and repeat elements between macro and microchromosomes  
153 were statistically significant (Wilcoxon-W = 137011, p-value = 5.7\*10<sup>-16</sup> for GD; Wilcoxon-W =  
154 68322, p-value < 2.2\*10<sup>-16</sup> for GC-content; and Wilcoxon-W = 283330, p-value < 2.2\*10<sup>-16</sup> for  
155 repeat elements).

## 156 ***Pathway analysis***

157 We assessed whether macrochromosomes and microchromosomes contain distinct  
158 functional classes of genes using pathway analyses. From the total of 16,384 protein coding  
159 genes that were identified by homology search, 9,590 gene IDs on macrochromosomes and  
160 3,129 on microchromosomes were identifiable by PANTHER16.0 [37,38] using the protein  
161 family/subfamily library (Fig. S2). These genes were classified into a total of 164 pathways from  
162 about 177 available pathways in PANTHER. The highest number of genes belonged to the “Wnt  
163 signaling pathway (P00057)” and “Gonadotropin-releasing hormone receptor pathway  
164 (P06664)”, which together accounted for more than 10% (more than 5% each) of the  
165 macrochromosomal and microchromosomal genes. We compared the frequencies of genes in  
166 each PANTHER pathway between macrochromosomes and microchromosomes and found 37  
167 pathways where all genes were located on macrochromosomes (Table S4), with 13 pathways  
168 having all genes localized to a single macrochromosome. Among microchromosomes, we found  
169 that three pathways have genes exclusively found on only microchromosomes and in all three  
170 pathways, these genes were located on a single microchromosome (Table S4). These 40  
171 pathways (37 for macrochromosomes + 3 for microchromosomes) mostly belong to  
172 biosynthesis, signaling, metabolism, and degradation pathways (in descending order).

## 173 **Synteny analysis**

174 We investigated how reptilian genome composition has been impacted by chromosomal  
175 rearrangements through evolutionary time using comparative synteny analyses among reptiles.  
176 We conducted pairwise analyses of synteny between the *P. platyrhinos* genome and 12 species  
177 (five lizards, three snakes, three turtles, and a bird) for which chromosome-level genome  
178 assemblies were available (Fig. 3)[39]. The genome of *S. merianae* has not been assembled to  
179 chromosomes but the karyotype of this species is known (5 macrochromosome and 14  
180 microchromosomes; [40]) so in this study we used 19 largest scaffolds from the *S. merianae*  
181 assembly with 5 scaffolds > 200 Mb and 14 scaffolds > 6 Mb). We performed synteny analyses  
182 using a ‘chromosome painting’ technique (see Methods), which established homology between  
183 sets of 100 bp *in silico* ‘markers’ from the *P. platyrhinos* chromosome scaffolds and regions of  
184 the genomes of the other reptile species (Table S5). We quantitatively assessed the degree to  
185 which syntenic blocks from each *P. platyrhinos* chromosome scaffold are dispersed across  
186 chromosomes of the other species (Fig. 4) using a dominance analysis [41], more commonly  
187 used in ecological community assessments. Specifically, dispersion was measured using the  
188 Simpson’s Dominance Index reciprocal (SR), with which we consider an effective number of  
189 target chromosomes in other species onto which the homologies of a given *P. platyrhinos*  
190 chromosome appear. This index ranges from 1 to  $m$ , where  $m$  is the number of chromosomes of  
191 the target species being compared to *P. platyrhinos*. A value of 1 represents high dominance,  
192 which in this context indicates that syntenic blocks from a chromosome of *P. platyrhinos* are  
193 restricted to a single chromosome of another species. A value of  $m$  would mean all  
194 chromosomes of the target species contain an even proportion of *P. platyrhinos* syntenic blocks.  
195 If a large syntenic block is retained in one chromosome while a few proportionally small syntenic  
196 blocks are distributed across other target chromosomes, the resulting dominance value will  
197 trend toward 1.



198 Our results show that macrochromosomes tend to have a higher degree of dispersion  
199 across different chromosomes of other species than microchromosomes (e.g.,  
200 macrochromosome 1  $SR = 2.38 \pm 0.96$ ; microchromosome 1  $SR = 1.45 \pm 0.45$ ), except for  
201 macrochromosome 6 ( $SR = 1.44 \pm 0.27$ ; Fig. 5a). However, this chromosomal rearrangement  
202 does not follow the same pattern across species (Fig. 4). For example, *A. carolinensis* shows  
203 the highest values for SR in microchromosomes (Fig. 5b), but this may be an artifact of this  
204 species having an incomplete genome assembly for microchromosomes. In other lizards and  
205 snakes (with the exception of *C. viridis*),  $SR \sim 1$  for all microchromosomes (except  
206 microchromosome 6). In *G. gallus*,  $SR \sim 1$  for all microchromosomes except microchromosome  
207 1. In turtles, mean SR values for microchromosomes are  $> 1$ , but this is largely driven by higher  
208 SR values on microchromosomes 1, 4, and 6 (Fig. 4).

209 Macrochromosome synteny appears highly conserved between *P. platyrhinos* and *S.*  
210 *merianae*. Among the closest relatives of *P. platyrhinos*, *A. carolinensis* has the same  
211 macrochromosome arrangement as *P. platyrhinos* (Figs. 3-5). In the more distantly related  
212 snakes, *N. naja* and *C. viridis*, however, macrochromosomes 3 and 5 show high SR values and  
213 the remaining macrochromosomes have  $SR \sim 1$ . Compared to the other snakes, *T. elegans*  
214 (along with lizards in the family Lacertidae) generally possess a greater number of smaller  
215 macrochromosomes than *P. platyrhinos* and associated higher SR values. At greater  
216 phylogenetic distances, the breakdown of chromosomal synteny from lizards to other reptilian  
217 lineages becomes more apparent (cumulative  $SR \sim 30$  in turtles) and showing greater  
218 rearrangements and partitions of syntenic blocks in macrochromosomes than in  
219 microchromosomes (Fig. 4 and 5b).

220 Our results also show that rearrangements between macro- and microchromosomes are  
221 apparently common throughout the evolution of Reptilia, including macro and  
222 microchromosomes fusing together to form single macrochromosomes. For example,  
223 microchromosomes 5 and 6 in *P. platyrhinos* form a macrochromosome in *L. agilis*, *Z. vivipara*,

224 and *P. muralis*, chromosome 6 of *P. platyrhinos* is syntenic with a macrochromosome and a  
225 microchromosome in *S. merianae*, and microchromosome 6 of *P. platyrhinos* comprises two  
226 microchromosomes in *S. merianae*, *G. gallus*, and turtle species (Fig. 3).

227

## 228 Discussion

229 The *P. platyrhinos* genome is only the second chromosome-level assembly available for the  
230 diverse lizard family Iguanidae (after *A. carolinensis*), and the only member of this family with  
231 well assembled microchromosomes, thereby contributing a new valuable resource for  
232 comparative genomics of reptiles. For *P. platyrhinos*, we identified scaffolds representing the 6  
233 macrochromosomes and 11 microchromosomes that comprise the known karyotype for the  
234 genus *Phrynosoma* [27,28,42]. The higher contiguity and completeness of microchromosomal  
235 scaffolds in the *P. platyrhinos* genome relative to that of *A. carolinensis* enables some of the first  
236 comparisons of chromosome evolution in lizards that incorporates patterns distinct to macro-  
237 versus microchromosomes. Our analyses of this and other comparative reptilian genomes  
238 highlight distinct functional classes of genes, chromosomal structure, and rearrangement  
239 patterns in microchromosomes compared to macrochromosomes.

240 Consistent with previous studies of reptilian chromosome composition [8,9,43], we find  
241 that in *P. platyrhinos*, GC content, gene density, and repeat element density differ between  
242 macrochromosomes and microchromosomes, with gene density and GC content being higher  
243 on microchromosomes and repeat elements being more densely distributed on  
244 macrochromosomes. Patterns of high gene density on microchromosomes have been  
245 hypothesized to be an evolutionary solution to reduce overall DNA mass and increase  
246 recombination rates between coding regions, predominantly by reducing repeat element content  
247 [3]. High recombination rates further increase GC content due to GC-biased gene conversion  
248 [44], leading to a higher frequency of GC bases on microchromosomes that can house

249 functionally different gene content compared to macrochromosomes [12], a pattern we also  
250 observed in the *P. platyrhinos* genome (Fig. 2 and S1).

251 Our synteny analyses across reptile genomes revealed that splitting, fusion, and  
252 rearrangement events among chromosomes have occurred frequently and repeatedly  
253 throughout reptile evolution. This pattern of chromosome blocks shifting between macro-, and  
254 microchromosome-linkage likely explains some unusual patterns of gene density, GC-content,  
255 and repeat elements, such as blocks of high gene density on a macrochromosome that may  
256 represent ancestral fragments derived from microchromosomes. For example, high GC content  
257 and gene density relative to other macrochromosomes on one end of macrochromosome 6 of *P.*  
258 *platyrhinos* (extending for ~40 Mbp; Fig. 2) supports the scenario that a microchromosomal  
259 region with higher gene and GC density was recently translocated to a macrochromosome in  
260 the ancestor of *P. platyrhinos*. This process may have also contributed to the observed variation  
261 in the numbers and sizes of macro- and microchromosomes, even among closely related  
262 species (e.g., *P. platyrhinos* versus *A. carolinensis*, and *C. viridis* versus *T. elegans*). Among  
263 macrochromosomes, fusion, splitting, and translocation to other chromosomes in more distantly  
264 related species such as turtles and chicken are common, whereas microchromosomes of *P.*  
265 *platyrhinos* typically remain in single homologous blocks in these other reptilian lineages, though  
266 there are exceptions (Fig. 4 and Fig. 5b). Broadly, these findings suggest that ancestral  
267 chromosomal rearrangements may have resulted in regions of reptilian genomes that have not  
268 yet reached mutational and compositional equilibria, which are otherwise characteristic of  
269 macro- and microchromosomal regions, following ancestral chromosomal rearrangement  
270 events.

271 Adding to the growing body of evidence for the structural, compositional, and  
272 evolutionary distinctions between micro- and macrochromosomes [9,12,45,46,47,48,49], our  
273 analyses suggest that the gene content of these two classes of chromosomes may be distinct in  
274 function. Our preliminary observation of enrichment of genes from certain pathways on

275 individual chromosomes or on macro- and microchromosomes more generally warrants further  
276 investigation. These biases could be driven by ancestral contingencies of gene content or active  
277 translocations of genes across chromosome classes, which may suggest a functionally driven  
278 basis for such biases. These inferences, together with other emerging evidence for the  
279 compositional and functional distinctiveness between micro- and macrochromosomes [9,12,45]  
280 suggest that there may be key functional, evolutionary, and mechanistic features that distinguish  
281 these chromosome classes that explain the significance of the presence and abundance of  
282 microchromosomes across eukaryote lineages.

283

## 284 **Methods**

### 285 ***Genome and transcriptome assembly***

286 We sequenced and assembled the reference genome from a female desert horned lizard  
287 collected in Dry Lake Valley, Nevada (NCBI accession SAMN17187150). This specimen was  
288 collected and euthanized according to Miami University Institutional Animal Care and Use  
289 Committee protocol 992\_2021\_Apr. Liver tissue was snap frozen in liquid nitrogen and sent to  
290 Dovetail Genomics (Scotts Valley, CL) for extraction of DNA and construction of shotgun,  
291 Chicago, and Dovetail Hi-C paired end libraries. DNA was extracted using buffer G2, and Qiagen  
292 protease. Three initial shotgun sequencing libraries were constructed by fragmenting DNA  
293 extracts to 475 bp and using a TruSeq PCR-free library prep kit to ligate sequencing adapters  
294 and amplify each library. The resulting libraries were sequenced on an Illumina HiSeqX and  
295 resulted in 859.9 million read pairs from paired end libraries (totaling 246 Gbp; see Table 3 for the  
296 number of sequenced reads for each library). Reads were trimmed for quality, sequencing  
297 adapters, and mate pair adapters using Trimmomatic [50], Using these data, contigs and small

298 scaffolds were assembled using Meraculous 2.2.4 (diploid\_mode 1) [51] with a kmer size of 49-  
299 mers. which produced an assembly with a scaffold N50 of 0.013 Mb.

300 The original assembly was first scaffolded using a Chicago library according to the manufacturer's  
301 protocol. Three Chicago libraries were prepared as described previously [26]. Briefly, for each  
302 library, ~500ng of HMW gDNA was reconstituted into chromatin *in vitro* and fixed with  
303 formaldehyde. Fixed chromatin was digested with DpnII, the 5' overhangs filled in with biotinylated  
304 nucleotides, and then free blunt ends were ligated. After ligation, crosslinks were reversed, and  
305 the DNA purified from protein. Purified DNA was treated to remove biotin that was not internal to  
306 ligated fragments. The DNA was then sheared to ~350 bp mean fragment size and sequencing  
307 libraries were generated using NEBNext Ultra enzymes and Illumina-compatible adapters. Biotin-  
308 containing fragments were isolated using streptavidin beads before PCR enrichment of each  
309 library. The libraries were sequenced on an Illumina HiSeqX. The number and length of read pairs  
310 produced for all libraries was 528 million 2x150 bp paired end reads (see Table 3 for the number  
311 of sequenced reads for each library). The resulting scaffolded assembly was far more contiguous  
312 with a scaffold N50 of 63.431 Mb. Lastly, a final round of scaffolding was performed using data  
313 from the Dovetail Hi-C library according to the manufacturer's protocols. Three Dovetail Hi-  
314 C libraries were prepared in a similar manner as described previously [50]. Briefly, for each library,  
315 chromatin was fixed in place with formaldehyde in the nucleus and then extracted. The following  
316 steps were the same as creating Chicago libraries. The number and length of read pairs produced  
317 for all libraries was 515 million 2x150 bp paired end reads (see Table 3 for the number of  
318 sequenced reads for each library). The input *de novo* assembly, Chicago library reads,  
319 and Dovetail Hi-C library reads were used as input data for HiRise, a software pipeline  
320 ([https://github.com/DovetailGenomics/HiRise\\_July2015\\_GR](https://github.com/DovetailGenomics/HiRise_July2015_GR)) designed specifically for  
321 using proximity ligation data to scaffold genome assemblies. First, Chicago library sequences  
322 were aligned to the draft input assembly using SNAP v1.0.0 [51] (<http://snap.cs.berkeley.edu>).  
323 The separations of Chicago read pairs mapped within draft scaffolds were analyzed by HiRise to



324 produce a likelihood model for genomic distance between read pairs, and the model was used to  
325 identify and break putative misjoins, to score prospective joins, and make joins above a  
326 threshold. After aligning and scaffolding Chicago data, Dovetail Hi-C library sequences were  
327 aligned and scaffolded following the same method. The final assembly (NCBI accession  
328 PRJNA685451) has a length of 1,901.85 Mb with a contig N50 of 12.04 kb and a scaffold N50 of  
329 273.213 Mb (see Table 1 for more statistics for this genome assembly).

330 Transcriptomic libraries were sequenced from 8 tissues (liver, lungs, brain, muscle, testes,  
331 heart, eyes, and kidneys) from a male lizard collected and euthanized according to Miami  
332 University Institutional Animal Care and Use Committee protocol 992\_2021\_Apr at the same  
333 locality as the genome animal. For each library, total RNA was extracted using Trizol reagent,  
334 and unstranded mRNAseq libraries were individually prepared using an NEBNext Ultra RNA  
335 Library Prep kit with library insert sizes of 250-300 bp and sequenced on an Illumina HiSeq4000  
336 platform using a paired-end 150 bp run by Novogene Corporation Inc (Table 4). We used Trinity  
337 r2014 0413p1 to assemble transcriptome reads from all tissues (using min\_kmer\_cov:1 and  
338 default settings).

### 339 ***Chromosome identification***

340 According to the karyotype for phrynosomatid [42] and *P. platyrhinos* [27,52] ( $2n=34$ ), we  
341 expected 6 pairs of macrochromosomes and 11 pairs of microchromosomes (one pair of  
342 microchromosomes is expected to be sex linked) for *P. platyrhinos*, and assumed this karyotype  
343 was correct for organizing our scaffolded genome assembly. Assigning scaffolds to specific  
344 chromosomes was done using blast+2.8.0 [53] using program “blastx” (options  
345 “num\_threads”=4, “-max\_target\_seqs”=10, “-evalue”= 1e-5, and “-outfmt”=11). We used  
346 chromosome-linked gene markers in other close species (*A. carolinensis*, *Leiolepis reevesii*)  
347 [29] and X-linked markers in *A. carolinensis* [39] downloaded from NCBI (Table S1) to identify  
348 the genomic location of each gene marker. Available markers for macrochromosomes in lizards

349 were matched to seven of the largest scaffolds (two scaffolds for chromosome 3), which we  
350 sorted by size and named macrochromosomes 1-6. From the remaining scaffolds, 10 scaffolds  
351 (> 8 Mbp) were selected as potential microchromosomes. This suggested that one scaffold  
352 comprises two microchromosomes fused together as the expected number of  
353 microchromosomes was 11. Synteny analysis suggested that scaffold “Scf4326\_4427” (Fig. 6)  
354 has at least three origins in other closely related species. For example, in *S. merianae*, three  
355 microchromosome account for this scaffold, while the rest of scaffolds were linked to a specific  
356 microchromosome. Given that Chicago libraries reconstitute chromatin *in vitro*, interactions  
357 between distinct chromosomes are significantly reduced compared to *in vivo* Hi-C libraries [54].  
358 Also, microchromosomes may have a greater frequency of inter-chromosomal contact [12] than  
359 expected in models used to scaffold based on Hi-C sequencing data. Therefore, we scanned for  
360 breakpoints between Chicago scaffolds in microchromosome scaffolds and for each of these  
361 breakpoints, we used multiple forms of evidence to assess whether a scaffold should be  
362 manually split. Following Schield [8], patterns of GC content, repeat density, and gene density at  
363 each breakpoint were assessed and we looked for instances in which there were abrupt shifts in  
364 these measures near breakpoints between Chicago scaffolds. At two of these breakpoints on  
365 the putatively artificially-merged (with a window of about 100 bp Ns/gaps) scaffold  
366 “Scf4326\_4427”, we observed elevated GC content, and reduced repeat elements density (Fig.  
367 S3). Based on these patterns, we chose to split this scaffold at the breakpoint location with  
368 reduced gene density to produce a final, curated assembly with the expected number of  
369 microchromosomes and finally numbered them based on their size.

### 370 **Genome annotation**

371 Repeat elements were first identified using RepeatModeler v. 1.0.11 [35] for *de novo* prediction  
372 of repeat families. To annotate genome-wide complex repeats, we used RepeatMasker v. 4.0.8  
373 [36] with default settings to identify known Tetrapoda repeats present in the curated Rebase

374 database release 20181026 [55]. We then ran 2 iterative rounds of RepeatMasker to annotate  
375 the known and the unknown elements identified by RepeatModeler, respectively, where the  
376 genome sequence provided for each analysis was masked based on all previous rounds of  
377 RepeatMasker.

378 We used MAKER v. 2.31.10 [32] as a consensus-based approach to annotate protein-coding  
379 genes in an iterative fashion. For annotation, a genome with complex, interspersed repeats hard  
380 masked as Ns was supplied and we set the 'model\_org' option to 'simple' in the MAKER control  
381 file (maker\_opts.ctl) to have MAKER soft mask simple repeats prior to gene annotation. The full  
382 *de novo* *P. platyrhinos* transcriptome assembly and protein datasets consisting of all annotated  
383 proteins for *A. carolinensis* [13] from NCBI were used as the evidence for protein coding gene  
384 prediction. For the first round of annotation, "est2genome" and "protein2genome" were set to 1  
385 to predict genes based on the aligned transcripts and proteins. Using the gene models from the  
386 first round of MAKER, we were able to train gene prediction software AUGUSTUS v. 3.2.3. [33].  
387 To do so, we used Benchmarking Universal Single-Copy Orthologs (BUSCOs) v. 2.0.1, which  
388 has an internal pipeline to automate the training of Augustus based on a set of conserved,  
389 single-copy orthologs for Tetrapoda (Tetrapoda odb9 dataset) [56]. We ran BUSCO in the  
390 'genome' mode and specified the '--long' option to have BUSCO perform internal Augustus  
391 parameter optimization. Then we ran MAKER with *ab initio* gene prediction ('est2genome=0'  
392 and 'protein2genome=0' options set) using transcripts, proteins, and repeat elements resulted  
393 from the first MAKER round as the empirical evidence (in GFF format) to produce gene models  
394 using the AUGUSTUS within the MAKER. For all MAKER analyses, we used default settings,  
395 except for 'trna' (set to 1), 'max\_dna\_len' (set to 300,000) and 'split\_hit' (set to 20,000). We  
396 used the gene models from our second round of MAKER annotation to re-optimize AUGUSTUS  
397 as described above before running one final MAKER analysis (round 3) with the re-optimized  
398 AUGUSTUS settings (all other settings are identical to round 2). We compared Annotation Edit  
399 Distance (AED) distributions, gene numbers, and average gene lengths across each round of

400 Maker annotation to assess quality and used our final MAKER round (round 3; N = 20,764  
401 genes) as our final gene annotation.  
402 We ascribed gene IDs based on homology using reciprocal best-blast (with e-value thresholds  
403 of 1e-5) and stringent one-way blast (with an e-value threshold of 1e-8) searches against  
404 protein sequences from NCBI for *A. carolinensis*, *Pogona vitticeps* [57], *P. muralis* [16], *Gekko*  
405 *Japanese* [58], *Python molurus* [59], *Pseudonaja textilis* [60], *Notechis scutatus* [60],  
406 *Protobothrops mucrosquamatus* [61], *Thamnophis sirtalis* [62], *Alligator mississippiensis* [63],  
407 *Alligator sinensis* [64], *Crocodylus porosus* [65], *Chrysemys picta* [66], *Terrapene carolina* [67],  
408 *Chelonia mydas* [68], *Pelodiscus sinensis* [68], *G. gallus*, *Homo sapiens* [69], *Mus musculus*  
409 [70], and Swiss-Prot [71] using a custom reciprocal best blast (RBB) script (orthorbb 2.2; see  
410 <https://github.com/darencard/GenomeAnnotation/blob/master/orthorbb>). We also searched our  
411 annotated transcriptome against Interpro database via Interproscan--5.36-75.0 [72].

## 412 **Pathway analysis**

413 To compare macrochromosomes and microchromosomes functionally, protein coding genes on  
414 each chromosome were analyzed using gene IDs resulted from homology search. An ID list of  
415 all annotated genes on each chromosome was used for pathway analysis in PANTHER16.0  
416 (<http://pantherdb.org/> via browser and “Gene List Analysis” tools option) classification system.  
417 Four model organisms (*A. carolinensis*, *G. gallus*, *M. musculus*, and *H. sapiens*) were selected  
418 as the reference for gene IDs. PANTHER assigned each gene to at least one of the 164  
419 pathways identified for *P. platyrhinos* genome annotation (with a range from 2 to 759 genes in  
420 each pathway; Fig. S4). The distributions of each pathway among different chromosomes were  
421 compared using pathway results for each chromosome to identify potential pathways that  
422 belong to a specific chromosome/group of chromosomes.

## 423 **Synteny and chromosomal composition**

424 We used a python script “slidingwindow\_gc\_content.py”  
425 (<https://github.com/drewschield/Comparative-Genomics-Tools>) to estimate GC content genome  
426 wide in windows of 1 Mbp. We estimated gene and repeat elements densities for the final  
427 genome assembly using python script “window\_quantify.py” with a window size of 1 Mbp. As the  
428 distribution of these variables (GD, GC-content, repeated elements) was highly skewed/non-  
429 normal, we performed Wilcoxon rank sum tests to check for statistically significant differences  
430 between macro and microchromosomes.

431 We explored broad-scale structural evolution across reptilian genomes using synteny analyses.  
432 We obtained chromosome-level genome assemblies from NCBI database  
433 (<https://www.ncbi.nlm.nih.gov/assembly/?term=reptiles>) for five lizards (*A. carolinensis*  
434 (GCA\_000090745.2), *S. merianae* (GCA\_003586115.2), *L. agilis* (GCA\_009819535.1), *P.*  
435 *muralis* (GCA\_004329235.1), and *Z. vivipara* (GCA\_011800845.1)), three snakes (*C. viridis*  
436 (GCA\_003400415.2), *T. elegans* (GCA\_009769535.1), and *N. naja* (GCA\_009733165.1)), one  
437 bird (*G. gallus* (GCA\_000002315.5)), and three turtles (*T. scripta* (GCA\_013100865.1), *G.*  
438 *evgoodei* (GCA\_007399415.1), and *D. coriacea* (GCA\_009764565.3)).

439 We used a previously established method for in silico painting [45,73] to partition the *P.*  
440 *platyrhinos* genome to 18.39 million 100-bp markers. As input for this approach, we used  
441 blast+2.9.0 to blast the markers against each genome (with “blastn” program and setting “-  
442 max\_hsp” and “-max\_target\_seqs” to 1, “outfmt”=6 qseqid sseqid sstart length pident,  
443 “num\_threads”=3, and the rest as default). Following Schield et al. (2019), homology signals for  
444 chromosome painting had two main conditions: 1) each marker should have an alignment length  
445 of 50 bp or greater, and 2) at least five consecutive markers must be present to infer homology  
446 (Table S5). This was determined for scaffolds from each species. For posterior analyses based  
447 on the synteny results, only the assembled chromosomes of each species (based on the

448 reference assembly) were considered. *Salvator merianae* was the only species in our analysis  
449 without assembled chromosomes, so we analyzed the 19 longest scaffolds (since karyotype  
450 analysis showed  $2n=38$ ) containing the majority of confirmed markers [40].

451 To assess the distribution of syntenic blocks of *P. platyrhinos* across scaffolds from the 12  
452 target species, we calculated Simpson's Dominance Index (D) and its reciprocal, which, in this  
453 context, can be considered the effective number of target chromosomes (C) containing  
454 homologies from a given *P. platyrhinos* chromosome:

$$455 \quad D_{ij} = \sum_{k=1}^m p_{ijk}^2$$

$$456 \quad C_{ij} = \frac{1}{D_{ij}}$$

457 Where  $i$  represents a *P. platyrhinos* chromosome,  $j$  represents a target species,  $m$  is the  
458 number of scaffolds in the target species  $j$  containing homologies from the  $i^{th}$  *P. platyrhinos*  
459 chromosome, and  $k$  represents a specific target scaffold. Values of D can range between 0 (low  
460 dominance, i.e., high spread of homologies) and 1 (full dominance, i.e., homologies remained in  
461 one target scaffold). Values of C can range between 1 (full dominance) and  $m$  (low dominance,  
462 i.e., equal spread of the  $i^{th}$  homologies across  $m$  target scaffolds).

## 463 Availability of supporting data and materials

464 The chromosome-level genome assembly, annotation files, and other supporting data sets are  
465 available in the *GigaScience* database (GigaDB). Raw genomic and transcriptomic sequencing  
466 reads, and genome assembly and annotation were deposited in the NCBI under BioProject  
467 number PRJNA685451.

## 468 List of abbreviations

469 AED: Annotation Edit Distance

470 BUSCO: Benchmarking Universal Single-Copy Orthologs

471 C: Effective number of target Chromosomes

472 D: Simpson's Dominance index

473 GD: Gene Density

474 SR: Simpson's Reciprocal

## 475 Ethics Approval

476 All animal collected and euthanized according to Miami University Institutional Animal Care and

477 Use Committee protocol 992\_2021\_Apr.

## 478 Competing interests

479 The authors declare that they have no competing interests.

## 480 Authors' contributions

481 N.K. and T.J. designed the project and wrote the first draft of the manuscript. N.K., A.A., K.F.,

482 D.C.C., and D.R.S. performed bioinformatics and data analyses. All authors contributed to

483 writing and approved the final manuscript.

## 484 Acknowledgments

485 This work was supported by startup funds from Miami University to T. Jezkova. K. Farleigh was

486 supported by the National Science Foundation Graduate Research Fellowship Program (Award

487 # 2037786). We thank Aaron Ambos and Dr. Jef Jaeger for help with obtaining specimens. The

488 analyses were performed on Miami University Redhawk cluster with incredible assistance from

489 Dr. Jens Mueller.

## 490 References

- 491 1. Deakin, J. E., and Ezaz, T. (2019). Understanding the Evolution of Reptile Chromosomes  
492 through Applications of Combined Cytogenetics and Genomics Approaches. *Cytogenetic*  
493 *and Genome Research*, 157, 7–20. <https://doi.org/10.1159/000495974>
- 494 2. Gemmell, N. J., Rutherford, K., Prost, S., Tollis, M., Winter, D., Macey, J. R., Adelson, D. L.,  
495 Suh, A., Bertozzi, T., Grau, J. H., Organ, C., Gardner, P. P., Muffato, M., Patricio, M., Billis,  
496 K., Martin, F. J., Flicek, P., Petersen, B., Kang, L., ... Stone, C. (2020). The tuatara genome  
497 reveals ancient features of amniote evolution. *Nature*, 584, 403–409.  
498 <https://doi.org/10.1038/s41586-020-2561-9>
- 499 3. Burt, D. W. (2002). Origin and evolution of avian microchromosomes. *Cytogenetic and Genome*  
500 *Research*, 96, 97–112. <https://doi.org/10.1159/000063018>
- 501 4. Waters, P. D., Simakov, O., Ezaz, T., Kaur, P., Frere, C., Grützner, F., Georges, A., Graves, J.  
502 A. M., Ruiz-herrera, A., Nicholas, C., Waters, P., Grützner, F., and Georges, A. (2021).  
503 *Microchromosomes are building blocks of bird , reptile and mammal chromosomes † Equal*  
504 *contribution \* Corresponding author ORCID numbers of all authors Author Contributions :*  
505 *Competing Interest Statement : Classification : Keywords : This PDF file includes.*
- 506 5. Solinhac, R., Leroux, S., Galkina, S., Chazara, O., Fève, K., Vignoles, F., Morisson, M.,  
507 Derjusheva, S., Bed'hom, B., Vignal, A., Fillon, V., and Pitel, F. (2010). Integrative mapping  
508 analysis of chicken microchromosome 16 organization. *BMC Genomics*, 11, 616.  
509 <https://doi.org/10.1186/1471-2164-11-616>
- 510 6. Axelsson, E. (2005). Comparison of the chicken and turkey genomes reveals a higher rate of  
511 nucleotide divergence on microchromosomes than macrochromosomes. *Genome*  
512 *Research*, 15, 120–125. <https://doi.org/10.1101/gr.3021305>



- 513 7. O'Connor, R. E., Kiazim, L., Skinner, B., Fonseka, G., Joseph, S., Jennings, R., Larkin, D. M.,  
514 and Griffin, D. K. (2019). Patterns of microchromosome organization remain highly  
515 conserved throughout avian evolution. *Chromosoma*, 128, 21–29.  
516 <https://doi.org/10.1007/s00412-018-0685-6>
- 517 8. Schield, D. R., Card, D. C., Hales, N. R., Perry, B. W., Pasquesi, G. M., Blackmon, H., Adams,  
518 R. H., Corbin, A. B., Smith, C. F., Ramesh, B., Demuth, J. P., Betrán, E., Tollis, M., Meik, J.  
519 M., Mackessy, S. P., and Castoe, T. A. (2019). The origins and evolution of chromosomes,  
520 dosage compensation, and mechanisms underlying venom regulation in snakes. *Genome*  
521 *Research*, 29, 590–601. <https://doi.org/10.1101/gr.240952.118>
- 522 9. Schield, D. R., Pasquesi, G. I. M., Perry, B. W., Adams, R. H., Nikolakis, Z. L., Westfall, A. K.,  
523 Orton, R. W., Meik, J. M., Mackessy, S. P., and Castoe, T. A. (2020). Snake Recombination  
524 Landscapes Are Concentrated in Functional Regions despite PRDM9. *Molecular Biology*  
525 *and Evolution*, 37, 1272–1294. <https://doi.org/10.1093/molbev/msaa003>
- 526 10. Damas, J., Kim, J., Farré, M., Griffin, D. K., and Larkin, D. M. (2018). Reconstruction of avian  
527 ancestral karyotypes reveals differences in the evolutionary history of macro- and  
528 microchromosomes. *Genome Biology*, 19, 155. <https://doi.org/10.1186/s13059-018-1544-8>
- 529 11. Axelsson, E., Webster, M. T., Smith, N. G. C., Burt, D. W., and Ellegren, H. (2005).  
530 Comparison of the chicken and turkey genomes reveals a higher rate of nucleotide  
531 divergence on microchromosomes than macrochromosomes. *Genome Research*, 15, 120–  
532 125. <https://doi.org/10.1101/gr.3021305>
- 533 12. Perry, B. W., Schield, D. R., Adams, R. H., and Castoe, T. A. (2020). Microchromosomes  
534 Exhibit Distinct Features of Vertebrate Chromosome Structure and Function with  
535 Underappreciated Ramifications for Genome Evolution. *Molecular Biology and Evolution*, 1–  
536 7. <https://doi.org/10.1093/molbev/msaa253>

- 537 13. Alföldi, J., Di Palma, F., Grabherr, M., Williams, C., Kong, L., Mauceli, E., Russell, P., Lowe,  
538 C. B., Glor, R. E., Jaffe, J. D., Ray, D. A., Boissinot, S., Shedlock, A. M., Botka, C., Castoe,  
539 T. A., Colbourne, J. K., Fujita, M. K., Moreno, R. G., ten Hallers, B. F., ... Lindblad-Toh, K.  
540 (2011). The genome of the green anole lizard and a comparative analysis with birds and  
541 mammals. *Nature*, 477, 587–591. <https://doi.org/10.1038/nature10390>
- 542 14. Yurchenko, A. A., Recknagel, H., and Elmer, K. R. (2020). Chromosome-level assembly of  
543 the common lizard (*Zootoca vivipara*) genome. *Genome Biology and Evolution*.  
544 <https://doi.org/10.1093/gbe/evaa161>
- 545 15. Gemmell, N., Haase, B., Formenti, G., Sims, Y., Wood, J., Howe, K., Mountcastle, J., Lillie,  
546 M., Olsson, M., Rhie, A., Fedrigo, O., and Jarvis, E. D. (2019). *Lacerta agilis* (Sand lizard)  
547 genome, rLacAgi1, primary haplotype. *Vertebrate Genomes Project, G10K, 1230 York*  
548 *Avenue, New York, NY 10065, USA*.
- 549 16. Andrade, P., Pinho, C., Pérez i de Lanuza, G., Afonso, S., Brejcha, J., Rubin, C.-J.,  
550 Wallerman, O., Pereira, P., Sabatino, S. J., Bellati, A., Pellitteri-Rosa, D., Bosakova, Z.,  
551 Bunikis, I., Carretero, M. A., Feiner, N., Marsik, P., Paupério, F., Salvi, D., Soler, L., ...  
552 Carneiro, M. (2019). Regulatory changes in pterin and carotenoid genes underlie balanced  
553 color polymorphisms in the wall lizard. *Proceedings of the National Academy of Sciences*,  
554 116, 5633–5642. <https://doi.org/10.1073/pnas.1820320116>
- 555 17. Roscito, J. G., Sameith, K., Pippel, M., Francoijs, K.-J., Winkler, S., Dahl, A., Papoutsoglou,  
556 G., Myers, G., and Hiller, M. (2018). The genome of the tegu lizard *Salvator merianae* :  
557 combining Illumina, PacBio, and optical mapping data to generate a highly contiguous  
558 assembly. *GigaScience*, 7, 1–13. <https://doi.org/10.1093/gigascience/giy141>
- 559 18. Jezkova, T., Jaeger, J. R., Oláh-Hemmings, V., Jones, K. B., Lara-Resendiz, R. A., Mulcahy,  
560 D. G., and Riddle, B. R. (2016). Range and niche shifts in response to past climate change

- 561 in the desert horned lizard *Phrynosoma platyrhinos*. *Ecography*, 39, 437–448.  
562 <https://doi.org/10.1111/ecog.01464>
- 563 19. Pasquesi, G. I. M., Adams, R. H., Card, D. C., Schield, D. R., Corbin, A. B., Perry, B. W.,  
564 Reyes-Velasco, J., Ruggiero, R. P., Vandewege, M. W., Shortt, J. A., and Castoe, T. A.  
565 (2018). Squamate reptiles challenge paradigms of genomic repeat element evolution set by  
566 birds and mammals. *Nature Communications*, 9, 2774. [https://doi.org/10.1038/s41467-018-](https://doi.org/10.1038/s41467-018-05279-1)  
567 05279-1
- 568 20. Bronikowski, A., Fedrigo, O., Functammasan, C., Rhie, A., Mountcastle, J., Haase, B., Howe,  
569 K., Chow, W., Collins, J., and Jarvis, E. D. (2019). *Thamnophis elegans* (Western terrestrial  
570 garter snake) genome, rThaEle1, primary haplotype. *Vertebrate Genomes Project, G10K*,  
571 1230 York Avenue, New York, NY 10065, USA.
- 572 21. Suryamohan, K., Seshagiri, S., and Guillory, J. (2019). Nana\_v5. *Molecular Biology*,  
573 *Genentech Inc., 1 DNA Way, South San Francisco, CA 94403, USA*.
- 574 22. Hillier, L. W., Miller, W., Birney, E., Warren, W., Hardison, R. C., Ponting, C. P., Bork, P., Burt,  
575 D. W., Groenen, M. A. M., Delany, M. E., Dodgson, J. B., Chinwalla, A. T., Cliften, P. F.,  
576 Clifton, S. W., Delehaunty, K. D., Fronick, C., Fulton, R. S., Graves, T. A., Kremitzki, C., ...  
577 Wilson, R. K. (2004). Sequence and comparative analysis of the chicken genome provide  
578 unique perspectives on vertebrate evolution. *Nature*, 432, 695–716.  
579 <https://doi.org/10.1038/nature03154>
- 580 23. Brian Simison, W., Parham, J. F., Papenfuss, T. J., Lam, A. W., and Henderson, J. B. (2020).  
581 An Annotated Chromosome-Level Reference Genome of the Red-Eared Slider Turtle  
582 (*Trachemys scripta elegans*). *Genome Biology and Evolution*, 12, 456–462.  
583 <https://doi.org/10.1093/gbe/evaa063>
- 584 24. Murphy, B., Edwards, T., Rhie, A., Koren, S., Phillippy, A., Fedrigo, O., Haase, B.,

- 585 Mountcastle, J., Lewin, H., Damas, J., Howe, K., Formenti, G., Myers, G., Durbin, R., and  
586 Jarvis, E. D. (2019). G10K-VGP Goodes thornscrub tortoise genome, primary haplotype.  
587 *Vertebrate Genomes Project, G10K, 1230 York Avenue, New York, NY 10065, USA.*
- 588 25. Omoroske, L., Fedrigo, O., Mountcastle, J., Uliano Da Silva, M., Haase, B., Formenti, G.,  
589 Chow, W., Howe, K., Gilbert, M. T. P., Flicek, P., Gemmell, N., Marques, T., Scott, A.,  
590 Murphy, R., Bjorndal, K., Braun, E., Rhie, A., Phillippy, A., and Jarvis, E. D. (2019).  
591 (UPDATE)Dermochelys coriacea (Leatherback Sea Turtle) genome, rDerCor1, primary  
592 haplotype, v3. *Vertebrate Genomes Project, G10K, 1230 York Avenue, New York, NY*  
593 *10065, USA.*
- 594 26. Putnam, N. H., O'Connell, B. L., Stites, J. C., Rice, B. J., Blanchette, M., Calef, R., Troll, C.  
595 J., Fields, A., Hartley, P. D., Sugnet, C. W., Haussler, D., Rokhsar, D. S., and Green, R. E.  
596 (2016). Chromosome-scale shotgun assembly using an in vitro method for long-range  
597 linkage. *Genome Research, 26*, 342–350. <https://doi.org/10.1101/gr.193474.115>
- 598 27. Pianka, E. R. (1991). Phrynosoma platyrhinos Girard Desert Horned Lizard. *Catalogue of*  
599 *American Amphibians and Reptiles, 1981*, 1–4.
- 600 28. Leaché, A. D., and Linkem, C. W. (2015). Phylogenomics of Horned Lizards (Genus:  
601 Phrynosoma) Using Targeted Sequence Capture Data. *Copeia, 103*, 586–594.  
602 <https://doi.org/10.1643/CH-15-248>
- 603 29. Srikulnath, K., Nishida, C., Matsubara, K., Uno, Y., Thongpan, A., Suputtitada, S.,  
604 Apisitwanich, S., and Matsuda, Y. (2009). Karyotypic evolution in squamate reptiles:  
605 comparative gene mapping revealed highly conserved linkage homology between the  
606 butterfly lizard (Leiolepis reevesii rubritaeniata, Agamidae, Lacertilia) and the Japanese four-  
607 striped rat snake (Elaphe quadrivirg. *Chromosome Research, 17*, 975–986.  
608 <https://doi.org/10.1007/s10577-009-9101-7>

- 609 30. Rovatsos, M., Pokorná, M., Altmanová, M., and Kratochvíl, L. (2014). Cretaceous park of sex  
610 determination: sex chromosomes are conserved across iguanas. *Biology Letters*, 10,  
611 20131093. <https://doi.org/10.1098/rsbl.2013.1093>
- 612 31. Grabherr, M. G. ., Brian J. Haas, Moran Yassour Joshua Z. Levin, Dawn A. Thompson, Ido  
613 Amit, Xian Adiconis, Lin Fan, Raktima Raychowdhury, Qiandong Zeng, Zehua Chen, Evan  
614 Mauceli, Nir Hacohen, Andreas Gnirke, Nicholas Rhind, Federica di Palma, Bruce W., N.,  
615 and Friedman, and A. R. (2013). Trinity: reconstructing a full-length transcriptome without a  
616 genome from RNA-Seq data. *Nature Biotechnology*, 29, 644–652.  
617 <https://doi.org/10.1038/nbt.1883.Trinity>
- 618 32. Cantarel, B. L., Korf, I., Robb, S. M. C., Parra, G., Ross, E., Moore, B., Holt, C., Sanchez  
619 Alvarado, A., and Yandell, M. (2007). MAKER: An easy-to-use annotation pipeline designed  
620 for emerging model organism genomes. *Genome Research*, 18, 188–196.  
621 <https://doi.org/10.1101/gr.6743907>
- 622 33. Stanke, M., and Morgenstern, B. (2005). AUGUSTUS: a web server for gene prediction in  
623 eukaryotes that allows user-defined constraints. *Nucleic Acids Research*, 33, W465–W467.  
624 <https://doi.org/10.1093/nar/gki458>
- 625 34. Blum, M., Chang, H.-Y., Chuguransky, S., Grego, T., Kandasaamy, S., Mitchell, A., Nuka, G.,  
626 Paysan-Lafosse, T., Qureshi, M., Raj, S., Richardson, L., Salazar, G. A., Williams, L., Bork,  
627 P., Bridge, A., Gough, J., Haft, D. H., Letunic, I., Marchler-Bauer, A., ... Finn, R. D. (2021).  
628 The InterPro protein families and domains database: 20 years on. *Nucleic Acids Research*,  
629 49, D344–D354. <https://doi.org/10.1093/nar/gkaa977>
- 630 35. Smit, A., and Hubley, R. (2015). *RepeatModeler* (Open-1.0. 2008-2015).  
631 <http://www.repeatmasker.org>
- 632 36. Smit, AFA, Hubley, R., and Green, P. (n.d.-aj). *RepeatMasker* (Open-4.0).

- 633 <http://www.repeatmasker.org>
- 634 37. Mi, H., Muruganujan, A., Casagrande, J. T., and Thomas, P. D. (2013). Large-scale gene  
635 function analysis with the PANTHER classification system. *Nature Protocols*, 8, 1551–1566.  
636 <https://doi.org/10.1038/nprot.2013.092>
- 637 38. Mi, H., Ebert, D., Muruganujan, A., Mills, C., Albou, L.-P., Mushayamaha, T., and Thomas, P.  
638 D. (2021). PANTHER version 16: a revised family classification, tree-based classification  
639 tool, enhancer regions and extensive API. *Nucleic Acids Research*, 49, D394–D403.  
640 <https://doi.org/10.1093/nar/gkaa1106>
- 641 39. Rhie, A., McCarthy, S. A., Fedrigo, O., Damas, J., Formenti, G., Koren, S., Uliano-Silva, M.,  
642 Chow, W., Fungtammasan, A., Kim, J., Lee, C., Ko, B. J., Chaisson, M., Gedman, G. L.,  
643 Cantin, L. J., Thibaud-Nissen, F., Haggerty, L., Bista, I., Smith, M., ... Jarvis, E. D. (2021).  
644 Towards complete and error-free genome assemblies of all vertebrate species. *Nature*, 592,  
645 737–746. <https://doi.org/10.1038/s41586-021-03451-0>
- 646 40. da Silva, M. J., de Araújo Vieira, A. P., Galvão Cipriano, F. M., dos Santos Cândido, M. R.,  
647 de Oliveira, E. H. C., Gimenez Pinheiro, T., and da Silva, E. L. (2020). The Karyotype of  
648 *Salvator merianae* (Squamata, Teiidae): Analyses by Classical and Molecular Cytogenetic  
649 Techniques. *Cytogenetic and Genome Research*, 160, 94–99.  
650 <https://doi.org/10.1159/000506140>
- 651 41. Hill, M. O. (1973). Diversity and Evenness : A Unifying Notation and Its Consequences Author  
652 ( s ): M . O . Hill Published by : Ecological Society of America DIVERSITY AND EVENNESS :  
653 A UNIFYING NOTATION AND ITS CONSEQUENCES '. *Ecology*, 54, 427–432.
- 654 42. Leaché, A.D., and Sites, Jr., J. W. (2009). Chromosome Evolution and Diversification in North  
655 American Spiny Lizards (Genus *Sceloporus*). *Cytogenetic and Genome Research*, 127,  
656 166–181. <https://doi.org/10.1159/000293285>

- 657 43. Backstrom, N., Forstmeier, W., Schielzeth, H., Mellenius, H., Nam, K., Bolund, E., Webster,  
658 M. T., Ost, T., Schneider, M., Kempnaers, B., and Ellegren, H. (2010). The recombination  
659 landscape of the zebra finch *Taeniopygia guttata* genome. *Genome Research*, *20*, 485–495.  
660 <https://doi.org/10.1101/gr.101410.109>
- 661 44. Huttener, R., Thorrez, L., in't Veld, T., Granvik, M., Snoeck, L., Van Lommel, L., and Schuit,  
662 F. (2019). GC content of vertebrate exome landscapes reveal areas of accelerated protein  
663 evolution. *BMC Evolutionary Biology*, *19*, 144. <https://doi.org/10.1186/s12862-019-1469-1>
- 664 45. Schield, D. R., Card, D. C., Hales, N. R., Perry, B. W., Pasquesi, G. M., Blackmon, H., Adams,  
665 R. H., Corbin, A. B., Smith, C. F., Ramesh, B., Demuth, J. P., Betrán, E., Tollis, M., Meik, J.  
666 M., Mackessy, S. P., and Castoe, T. A. (2019). The origins and evolution of chromosomes,  
667 dosage compensation, and mechanisms underlying venom regulation in snakes. *Genome*  
668 *Research*, *29*, 590–601. <https://doi.org/10.1101/gr.240952.118>
- 669 46. Damas, J., Kim, J., Farré, M., Griffin, D. K., and Larkin, D. M. (2018). Reconstruction of avian  
670 ancestral karyotypes reveals differences in the evolutionary history of macro- and  
671 microchromosomes. *Genome Biology*, *19*, 155. <https://doi.org/10.1186/s13059-018-1544-8>
- 672 47. Axelsson, E., Webster, M. T., Smith, N. G. C., Burt, D. W., and Ellegren, H. (2005).  
673 Comparison of the chicken and turkey genomes reveals a higher rate of nucleotide  
674 divergence on microchromosomes than macrochromosomes. *Genome Research*, *15*, 120–  
675 125. <https://doi.org/10.1101/gr.3021305>
- 676 48. Smith, J., Bruley, C. K., Paton, I. R., Dunn, I., Jones, C. T., Windsor, D., Morrice, D. R., Law,  
677 A. S., Masabanda, J., Sazanov, A., Waddington, D., Fries, R., and Burt, D. W. (2000).  
678 Differences in gene density on chicken macrochromosomes and microchromosomes.  
679 *Animal Genetics*, *31*, 96–103. <https://doi.org/10.1046/j.1365-2052.2000.00565.x>
- 680 49. Kuraku, S., Ishijima, J., Nishida-Umehara, C., Agata, K., Kuratani, S., and Matsuda, Y. (2006).

681 cDNA-based gene mapping and GC3 profiling in the soft-shelled turtle suggest a  
682 chromosomal size-dependent GC bias shared by sauropsids. *Chromosome Research*, 14,  
683 187–202. <https://doi.org/10.1007/s10577-006-1035-8>

684 50. Lieberman-Aiden, E., van Berkum, N. L., Williams, L., Imakaev, M., Ragooczy, T., Telling, A.,  
685 Amit, I., Lajoie, B. R., Sabo, P. J., Dorschner, M. O., Sandstrom, R., Bernstein, B., Bender,  
686 M. A., Groudine, M., Gnirke, A., Stamatoyannopoulos, J., Mirny, L. A., Lander, E. S., and  
687 Dekker, J. (2009). Comprehensive Mapping of Long-Range Interactions Reveals Folding  
688 Principles of the Human Genome. *Science*, 326, 289–293.  
689 <https://doi.org/10.1126/science.1181369>

690 51. Zaharia, M., Bolosky, W. J., Curtis, K., Fox, A., Patterson, D., Shenker, S., Stoica, I., Karp, R.  
691 M., and Sittler, T. (2011). *Faster and More Accurate Sequence Alignment with SNAP*. 1–10.  
692 <http://arxiv.org/abs/1111.5572>

693 52. Leaché, Adam D., Banbury, B. L., Linkem, C. W., and de Oca, A. N.-M. (2016). Phylogenomics  
694 of a rapid radiation: is chromosomal evolution linked to increased diversification in north  
695 american spiny lizards (Genus *Sceloporus*)? *BMC Evolutionary Biology*, 16, 63.  
696 <https://doi.org/10.1186/s12862-016-0628-x>

697 53. Camacho, C., Coulouris, G., Avagyan, V., Ma, N., Papadopoulos, J., Bealer, K., and Madden,  
698 T. L. (2009). BLAST+: architecture and applications. *BMC Bioinformatics*, 10, 421.  
699 <https://doi.org/10.1186/1471-2105-10-421>

700 54. Rice, E. S., Kohno, S., John, J. St., Pham, S., Howard, J., Lareau, L. F., O'Connell, B. L.,  
701 Hickey, G., Armstrong, J., Deran, A., Fiddes, I., Platt, R. N., Gresham, C., McCarthy, F.,  
702 Kern, C., Haan, D., Phan, T., Schmidt, C., Sanford, J. R., ... Green, R. E. (2017). Improved  
703 genome assembly of American alligator genome reveals conserved architecture of estrogen  
704 signaling. *Genome Research*, 27, 686–696. <https://doi.org/10.1101/gr.213595.116>



- 705 55. Bao, W., Kojima, K. K., and Kohany, O. (2015). Repbase Update, a database of repetitive  
706 elements in eukaryotic genomes. *Mobile DNA*, 6, 11. [https://doi.org/10.1186/s13100-015-](https://doi.org/10.1186/s13100-015-0041-9)  
707 0041-9
- 708 56. Simão, F. A., Waterhouse, R. M., Ioannidis, P., Kriventseva, E. V., and Zdobnov, E. M. (2015).  
709 BUSCO: assessing genome assembly and annotation completeness with single-copy  
710 orthologs. *Bioinformatics*, 31, 3210–3212. <https://doi.org/10.1093/bioinformatics/btv351>
- 711 57. Georges, A., Li, Q., Lian, J., O’Meally, D., Deakin, J., Wang, Z., Zhang, P., Fujita, M., Patel,  
712 H. R., Holleley, C. E., Zhou, Y., Zhang, X., Matsubara, K., Waters, P., Graves, J. A. M., Sarre,  
713 S. D., and Zhang, G. (2015). High-coverage sequencing and annotated assembly of the  
714 genome of the Australian dragon lizard *Pogona vitticeps*. *GigaScience*, 4, 45.  
715 <https://doi.org/10.1186/s13742-015-0085-2>
- 716 58. Liu, Y., Zhou, Q., Wang, Y., Luo, L., Yang, J., Yang, L., Liu, M., Li, Y., Qian, T., Zheng, Y., Li,  
717 M., Li, J., Gu, Y., Han, Z., Xu, M., Wang, Y., Zhu, C., Yu, B., Yang, Y., ... Gu, X. (2015).  
718 *Gekko japonicus* genome reveals evolution of adhesive toe pads and tail regeneration.  
719 *Nature Communications*, 6, 10033. <https://doi.org/10.1038/ncomms10033>
- 720 59. Castoe, T. A., de Koning, A. J., Hall, K. T., Yokoyama, K. D., Gu, W., Smith, E. N., Feschotte,  
721 C., Uetz, P., Ray, D. A., Dobry, J., Bogden, R., Mackessy, S. P., Bronikowski, A. M., Warren,  
722 W. C., Secor, S. M., and Pollock, D. D. (2011). Sequencing the genome of the Burmese  
723 python (*Python molurus bivittatus*) as a model for studying extreme adaptations in snakes.  
724 *Genome Biology*, 12, 406. <https://doi.org/10.1186/gb-2011-12-7-406>
- 725 60. Edwards J, R. (2018). Direct Submission. *UNIVERSITY OF NEW SOUTH WALES, Edwards*  
726 *Lab, E26/2110 BioScience South, UNSW SYDNEY, NSW 2052, Australia.*
- 727 61. Aird, S. D., Arora, J., Barua, A., Qiu, L., Terada, K., and Mikheyev, A. S. (2017). Population  
728 Genomic Analysis of a Pitviper Reveals Microevolutionary Forces Underlying Venom

- 729 Chemistry. *Genome Biology and Evolution*, 9, 2640–2649.  
730 <https://doi.org/10.1093/gbe/evx199>
- 731 62. Warren, W. C., and Wilson, R. K. (2015). Direct Submission. *The Genome Institute,*  
732 *Washington University School of Medicine, 4444 Forest Park, St. Louis, MO 63108, USA.*
- 733 63. St John, J. A., Braun, E. L., Isberg, S. R., Miles, L. G., Chong, A. Y., Gongora, J., Dalzell, P.,  
734 Moran, C., Bed'Hom, B., Abzhanov, A., Burgess, S. C., Cooksey, A. M., Castoe, T. A.,  
735 Crawford, N. G., Densmore, L. D., Drew, J. C., Edwards, S. V., Faircloth, B. C., Fujita, M. K.,  
736 ... Ray, D. A. (2012). Sequencing three crocodylian genomes to illuminate the evolution of  
737 archosaurs and amniotes. *Genome Biology*, 13, 415. [https://doi.org/10.1186/gb-2012-13-1-](https://doi.org/10.1186/gb-2012-13-1-415)  
738 415
- 739 64. Wan, Q., Pan, S., Hu, L., Zhu, Y., Xu, P., Xia, J., Chen, H., He, G., He, J., Ni, X., Hou, H.,  
740 Liao, S., Yang, H., Chen, Y., Gao, S., Ge, Y., Cao, C., Li, P., Fang, L., ... Fang, S. (2013).  
741 The genome sequence of Chinese alligator (*Alligator sinensis*). *BGI-Shenzhen, Beishan*  
742 *Industrial Zone, Yantian District, Shenzhen, Guangdong 518083, China.*
- 743 65. Pham, S., Fiddes, I., Deran, A., Armstrong, J., Rice, E. S., and Paten, B. (2016). Comparative  
744 assembly of saltwater crocodile genome. *Biomolecular Engineering, University of California,*  
745 *Santa Cruz, 1156 High St., Santa Cruz, CA 95064, USA.*
- 746 66. Badenhorst, D., Hillier, L. W., Literman, R., Montiel, E. E., Radhakrishnan, S., Shen, Y., Minx,  
747 P., Janes, D. E., Warren, W. C., Edwards, S. V., and Valenzuela, N. (2015). Physical  
748 Mapping and Refinement of the Painted Turtle Genome (*Chrysemys picta*) Inform Amniote  
749 Genome Evolution and Challenge Turtle-Bird Chromosomal Conservation. *Genome Biology*  
750 *and Evolution*, 7, 2038–2050. <https://doi.org/10.1093/gbe/evv119>
- 751 67. Deem, S. L., and Warren, W. C. (2018). Direct Submission. *McDonnell Genome Institute,*  
752 *Washington University School of Medicine, 4444 Forest Park, St. Louis, MO 63108, USA.*

- 753 68. Wang, Z., Pascual-anaya, J., Zadissa, A., Li, W., and Niimura, Y. (2014). *Europe PMC*  
754 *Funders Group The draft genomes of soft – shell turtle and green sea turtle yield insights*  
755 *into the development and evolution of the turtle – specific body plan. 45, 701–706.*  
756 <https://doi.org/10.1038/ng.2615>.The
- 757 69. Venter, J. C., Adams, M. D., Myers, E. W., Li, P. W., Mural, R. J., Sutton, G. G., Smith, H. O.,  
758 Yandell, M., Evans, C. A., Holt, R. A., Gocayne, J. D., Amanatides, P., Ballew, R. M., Huson,  
759 D. H., Wortman, J. R., Zhang, Q., Kodira, C. D., Zheng, X. H., Chen, L., ... Zhu, X. (2001).  
760 The Sequence of the Human Genome. *Science, 291, 1304–1351.*  
761 <https://doi.org/10.1126/science.1058040>
- 762 70. Brent, M. R., Birren, B. W., Antonarakis, S. E., Alexandersson, M., Zody, M., Birney, E.,  
763 Baertsch, R., Cuff, J., Parra, G., Slater, G., Waterston, R. H., Lindblad-Toh, K., Rogers, J.,  
764 Abril, J. F., Agarwal, P., Agarwala, R., Ainscough, R., An, P., Attwood, J., ... Lander, E. S.  
765 (2002). Initial sequencing and comparative analysis of the mouse genome. *Nature, 420,*  
766 *520–562.* <http://www.nature.com/nature/journal/v420/n6915/full/nature01262.html>
- 767 71. Bateman, A. (2019). UniProt: a worldwide hub of protein knowledge. *Nucleic Acids Research,*  
768 *47, D506–D515.* <https://doi.org/10.1093/nar/gky1049>
- 769 72. Jones, P., Binns, D., Chang, H.-Y., Fraser, M., Li, W., McAnulla, C., McWilliam, H., Maslen,  
770 J., Mitchell, A., Nuka, G., Pesseat, S., Quinn, A. F., Sangrador-Vegas, A., Scheremetjew,  
771 M., Yong, S.-Y., Lopez, R., and Hunter, S. (2014). InterProScan 5: genome-scale protein  
772 function classification. *Bioinformatics, 30, 1236–1240.*  
773 <https://doi.org/10.1093/bioinformatics/btu031>
- 774 73. McKenna, D. D., Scully, E. D., Pauchet, Y., Hoover, K., Kirsch, R., Geib, S. M., Mitchell, R.  
775 F., Waterhouse, R. M., Ahn, S.-J., Arsala, D., Benoit, J. B., Blackmon, H., Bledsoe, T.,  
776 Bowsher, J. H., Busch, A., Calla, B., Chao, H., Childers, A. K., Childers, C., ... Richards, S.

777 (2016). Genome of the Asian longhorned beetle (*Anoplophora glabripennis*), a globally  
778 significant invasive species, reveals key functional and evolutionary innovations at the  
779 beetle–plant interface. *Genome Biology*, 17, 227. [https://doi.org/10.1186/s13059-016-1088-](https://doi.org/10.1186/s13059-016-1088-8)  
780 8

781 74. Hedges, S. B., Dudley, J., and Kumar, S. (2006). TimeTree: a public knowledge-base of  
782 divergence times among organisms. *Bioinformatics*, 22, 2971–2972.  
783 <https://doi.org/10.1093/bioinformatics/btl505>

784

## 785 FIGURES

786 Figure 1. For each major clade, we list diploid chromosome numbers, macrochromosome numbers, and microchromosome  
787 numbers based on previous research [1]. The phylogeny was adapted from [2].

788

789 Figure 2. The genome content of *P. platyrhinos*. The outer circle shows gene density on each chromosome, the  
790 middle circle shows repeat element density, and the inner one shows GC content. Each estimate is calculated per 1  
791 million base pair window in each chromosome. “Ma” indicates macrochromosomes and “mi” stands for  
792 microchromosomes. Two scaffolds for macrochromosome 3 are attached together (the black line) and two  
793 microchromosomes (mi6 and mi10) resulted from a single scaffold were showed separately and in size order with the  
794 rest of the microchromosomes.

795

796 Figure 3. Synteny between *P. platyrhinos* and 12 reptilian taxa: three snakes (*N. naja*, *T. elegance*, and *C. viridis*),  
797 five lizards (*A. carolinensis*, *L. agilis*, *Z. vivipara*, *P. muralis*, and *S. merianae*), three turtles (*T. scripta*, *G. evgoodei*,  
798 and *D. coriacea*), and a bird (*G. gallus*). The cladogram shows the phylogenetic relationships among the sampled  
799 taxa [74] (two scaffolds for macrochromosome 3 (3a and 3b) are concatenated in this figure).

800

801 Figure 4. Effective number of chromosomes (C) assessed using the dominance analysis. Values close to 1 represent  
802 full dominance (homologies from a given *P. platyrhinos* chromosome are contained within a single  
803 chromosome/scaffold of another species). Values higher than 1 mean a spread of homologies across multiple  
804 chromosomes/scaffolds.

805

806 Figure 5. Summary of the effective number of chromosomes of *P. platyrhinos* in comparison with the 12 target  
807 species based on SR a) Mean and SD of SR for each chromosome among 12 species. Values close to 1 represent  
808 full dominance (homologies from a given *P. platyrhinos* chromosome are contained within a single  
809 chromosome/scaffold). Values higher than 1 mean a spread of homologies across multiple chromosomes/scaffolds.  
810 b) Cumulative SR for chromosomes of 12 reptilian species. The total amount of SR at greater phylogenetic distances,  
811 is higher (cumulative SR ~ 30 in turtles) and showing greater rearrangements and partitions of syntenic blocks in  
812 macrochromosomes than in microchromosomes

813

814 Figure 6. Synteny between *P. platyrhinos* potential microchromosomes (before assigning scaffolds to specific  
815 chromosomes) and the 12 reptilian genomes. The cladogram shows the phylogenetic relationships among the  
816 assessed taxa [74].

817

818 Figure S1: Repeat elements, GC content, and gene density calculated in 1Mb windows for each chromosome of *P.*  
819 *platyrhinos* (two scaffolds for macrochromosome 3 are concatenated) .

820

821 Figure S2: Proportion of identified gene IDs from protein-coding annotation to unidentified gene IDs by PANTHER a)  
822 across the chromosomes (Ma stands for macrochromosome, and mi stands for microchromosome). b) between two  
823 groups of chromosomes (Macros = macrochromosomes, and Micros = microchromosomes).

824

825 Figure S2. Investigating potential misassembled point on a final scaffold. a) Chicago scaffolds assembled to a final  
826 scaffold "Sc4326\_4427" were used to investigate a possible misassembled point. b) repeat elements, GC content,  
827 and gene density calculated in 1Mb windows were used as evidence to find break point on this final scaffold. Outlined  
828 cells are where the breakpoint was placed. Then microchromosomes were numbered based on size so these two  
829 scaffolds were numbered as microchromosome 10 (left portion) and microchromosome 6 (right portion).

830

831 Figure S4: Distribution of *P. platyrhinos* total annotated protein coding genes with identified IDs in PANTHER database.  
832 Among 164 PANTHER pathways assigned to *P. platyrhinos* protein coding genes, each pathway accounts for different  
833 number of genes (2< genes per pathway <759) that may belong to a specific chromosome (24 pathways only on  
834 macrochromosomes, and 3 only on microchromosomes) or group of chromosomes (13 pathways only in  
835 macrochromosomes group).

836

## 837 TABLES

838 Table 1. Basic information about the *P. platyrhinos* genome assembly.

| Assembly                   | Chicago Assembly | Chicago + Hi-C Assembly |
|----------------------------|------------------|-------------------------|
| Longest Scaffold (bp)      | 361,415,485      | 396,190,715             |
| Number of Scaffolds        | 5,458            | 5,294                   |
| Number of Scaffolds > 1 kb | 5,458            | 5,294                   |
| Contig N50 (kb)            | 12.04            | 12.04                   |
| Scaffold N50 (kb)          | 63,431           | 273,213                 |
| Number of Gaps             | 258,150          | 258,317                 |
| Percent of Genome in Gaps  | 1.54%            | 1.54%                   |

839

840 Table 2: BUSCO summary results.

| BUSCO benchmark             | Number | Percentage |
|-----------------------------|--------|------------|
| <b>Present BUSCOs</b>       | 4,324  | 81.5%      |
| Complete BUSCOs             | 3640   | 68.6%      |
| Complete single-copy BUSCOs | 3609   | 68.0%      |
| Complete duplicated BUSCOs  | 31     | 0.6%       |
| Fragmented BUSCOs           | 684    | 12.9%      |
| <b>Missing BUSCOs</b>       | 986    | 18.5%      |
| Total BUSCO groups searched | 5310   | 100        |

841

842

843 Table 3. Sequencing libraries used for the genome assembly of *P. platyrhinos*.

| Library                    | Read Type  | Number of Reads | Assembly Version | NCBI accession number |
|----------------------------|------------|-----------------|------------------|-----------------------|
| Shotgun library 1 (150 bp) | paired end | 311,540,000     | Primary          | SRR16071941           |
| Shotgun library 2 (150 bp) | paired end | 239,630,000     | Primary          | SRR16071940           |
| Shotgun library 3 (150 bp) | paired end | 308,750,000     | Primary          | SRR16071939           |
| Chicago library 1 (151 bp) | paired end | 402,000,000     | Intermediate     | SRR13811242           |
| Chicago library 2 (151 bp) | paired end | 398,000,000     | Intermediate     | SRR13811241           |
| Chicago library 3 (151 bp) | paired end | 256,000,000     | Intermediate     | SRR13811240           |
| Hi-C library 1 (151 bp)    | paired end | 332,000,000     | Final            | SRR13811239           |
| Hi-C library 2 (151 bp)    | paired end | 374,000,000     | Final            | SRR13811238           |
| Hi-C library 3 (151 bp)    | paired end | 324,000,000     | Final            | SRR13811237           |

844



845 Table 4. Number of reads obtained from 8 tissues of *P. platyrhinos*, used for transcriptome assembly.

| Sample ID    | Tissue  | Raw Reads  | Quality Trimmed Reads | NCBI accession number |
|--------------|---------|------------|-----------------------|-----------------------|
| TRO180600001 | liver   | 49,736,350 | 47,699,266            | SRR13326553           |
| TRO180600002 | lungs   | 40,643,066 | 39,124,052            | SRR13326552           |
| TRO180600003 | brain   | 85,097,044 | 81,754,486            | SRR13326551           |
| TRO180600004 | muscle  | 37,712,026 | 34,653,428            | SRR13326550           |
| TRO180600005 | testes  | 62,536,762 | 58,283,654            | SRR13326549           |
| TRO180600006 | heart   | 34,757,154 | 32,027,338            | SRR13326548           |
| TRO180600007 | eyes    | 46,140,488 | 42,334,272            | SRR13326547           |
| TRO180600008 | kidneys | 41,776,926 | 38,635,176            | SRR13326546           |

846

847 Table S1. The corresponding scaffolds (first column) for each chromosome of *P. platyrhinos* (second column) and  
 848 scaffold length (third column) in base pairs. \*This scaffold was broken down into two microchromosomes (6 and 10).

| Scaffold name | Chromosome(s) name  | length (in base pairs) |
|---------------|---------------------|------------------------|
| Sc3291_377    | Chromosome 1        | 396,190,715            |
| Sc439_455     | Chromosome 2        | 336,734,411            |
| Sc1234_1274   | Chromosome 3-a      | 178,616,284            |
| Sc1882_1940   | Chromosome 3-b      | 123,146,639            |
| Sc5292_5410   | Chromosome 4        | 273,212,746            |
| Sc5293_5450   | Chromosome 5        | 219,432,639            |
| Sc521_540     | Chromosome 6        | 129,273,435            |
| Sc3285_3371   | Microchromosome 1   | 31,685,405             |
| Sc3778_3872   | Microchromosome 2   | 28,086,253             |
| Sc415_430     | Microchromosome 3   | 27,277,973             |
| Sc35_37       | Microchromosome 4   | 27,087,043             |
| Sc3441_3531   | Microchromosome 5   | 26,097,904             |
| Sc4326_4427*  |                     |                        |
| Sc4326a4427   | Microchromosome 10  | 11,894,615             |
| Sc4326b4427   | microchromosome 6   | 23,702,528             |
| Sc26_27       | Microchromosome 7   | 20,466,995             |
| Sc5294_5452   | Microchromosome 8   | 16,009,790             |
| Sc1213_1253   | Microchromosome 9/X | 15,721,303             |
| Sc953_986     | Microchromosome 11  | 8,897,685              |

849

850 Table S2. Best blast hits of cDNA [29] and \* indicates sex linked markers [30] from *A. carolinensis* and *L.*  
 851 *reevesii* against the genome of *P. platyrhinos*.

| Marker   | Accession    | Chromosomal location   |                    |                       | E-value   |
|----------|--------------|------------------------|--------------------|-----------------------|-----------|
|          |              | <i>A. carolinensis</i> | <i>L. reevesii</i> | <i>P. platyrhinos</i> |           |
| DYNC1H1  | AB490348     |                        | 1q                 | Chr1                  | 2.95E-179 |
| ESR1     | AB490345     |                        | 1p                 | Chr1                  | 1.02E-113 |
| WT1      | XM_016992885 | 1                      |                    | Chr1                  | 2.19E-158 |
| WT1      | AB490347     |                        | 1q                 | Chr1                  | 7.53E-80  |
| XAB1     | AB490344     |                        | 1p                 | Chr1                  | 2.31E-35  |
| CHD1     | XM_008103079 | 2                      |                    | Chr2                  | 0         |
| CHD1     | AB480289     |                        | 2p                 | Chr2                  | 1.25E-144 |
| DMRT1    | XM_003216553 | 2                      |                    | Chr2                  | 0         |
| DMRT1    | AB480288     |                        | 2p                 | Chr2                  | 2.15E-64  |
| GHR      | XM_008102837 | 2                      |                    | Chr2                  | 0         |
| GHR      | AB480290     |                        | 2p                 | Chr2                  | 1.01E-104 |
| RPS6     | XM_003216606 | 2                      |                    | Chr2                  | 5.32E-123 |
| RPS6     | AB480287     |                        | 2p                 | Chr2                  | 2.39E-88  |
| RUFY1    | XM_008104854 | 2                      |                    | Chr2                  | 0         |
| RUFY1    | AB490352     |                        | 2q                 | Chr2                  | 3.45E-22  |
| EIF2S3   | XM_003218845 | 3                      |                    | Chr3-a                | 0         |
| EIF2S3   | AB490361     |                        | 3q                 | Chr3-a                | 5.58E-104 |
| OCA2     | XM_008107106 | 3                      |                    | Chr3-a                | 0         |
| OCA2     | AB490360     |                        | 3q                 | Chr3-a                | 1.78E-89  |
| SH3PXD2A | XM_016992171 | 3                      |                    | Chr3-b                | 0         |
| SH3PXD2A | AB490356     |                        | 3p                 | Chr3-b                | 5.98E-166 |
| TLOC1    | AB490355     | 3p                     |                    | Chr3-b                | 1.71E-79  |
| HDAC3    | XM_003219886 | 4                      |                    | Chr4                  | 0         |
| HDAC3    | AB490365     |                        | 4p                 | Chr4                  | 4.16E-97  |
| RBM12    | XM_008109953 | 4                      |                    | Chr4                  | 0         |
| RBM12    | AB490367     |                        | 4q                 | Chr4                  | 3.92E-137 |

|           |                |   |             |             |           |
|-----------|----------------|---|-------------|-------------|-----------|
| SS18      | XM_003219645   | 4 |             | Chr4        | 0         |
| SS18      | AB490397       |   | 4p          | Chr4        | 1.75E-70  |
| ZNF326    | XM_008109275   | 4 |             | Chr4        | 0         |
| ZNF326    | AB490366       |   | 4q          | Chr4        | 1.00E-128 |
| ACSL1     | XM_008111814   | 5 |             | Chr5        | 0         |
| ACSL1     | AB490370       |   | 5p          | Chr5        | 1.00E-95  |
| DCLK2     | XM_008111991   | 5 |             | Chr5        | 0         |
| DCLK2     | AB490369       |   | 5p          | Chr5        | 2.06E-73  |
| EXOC1     | XM_008111693   | 5 |             | Chr5        | 0         |
| EXOC1     | AB490371       |   | 5p          | Chr5        | 3.08E-176 |
| RANGAP1   | XM_008110743   | 5 |             | Chr5        | 0         |
| RANGAP1   | AB490374       |   | 5q          | Chr5        | 6.70E-80  |
| SOX5      | XM_008110345   | 5 |             | Chr5        | 0         |
| SOX5      | AB490376       |   | 5q          | Chr5        | 1.78E-104 |
| UCHL1     | XM_003221541   | 5 |             | Chr5        | 2.55E-63  |
| UCHL1     | AB490372       |   | 5p          | Chr5        | 3.46E-59  |
| CTNNB1    | AB490379       |   | 6q          | Chr6        | 0         |
| GAD2      | XM_003222133   | 6 |             | Chr6        | 0         |
| GAD2      | AB490380       |   | 6q          | Chr6        | 1.98E-76  |
| MYST2     | AB490378       |   | 6p          | Chr6        | 0         |
| WAC       | XM_008112381   | 6 |             | Chr6        | 0         |
| WAC       | AB490381       |   | 6q          | Chr6        | 3.60E-159 |
| AR        | AB490385       |   | micro       | microchr3   | 2.72E-152 |
| TMEM132D* | XM_008113640.2 |   | micro "b"/X | microchr9/X | 0         |
| FZD10*    | XM_003222753.3 |   | micro "b"/X | microchr9/X | 0         |
| ATP2A2*   | XM_008113715   |   | micro "b"/X | microchr9/X | 0         |
| ATP2A2    | AB490391       |   | micro       | microchr9/X | 4.05E-167 |
| ATRX      | AB490386       |   | micro       | microchr3   | 7.88E-127 |
| BRD7      | AB490390       |   | micro       | microchr2   | 3.95E-68  |
| HSPA8     | XM_003222794   |   | micro "a"   | Chr1        | 0         |
| HSPA8     | AB490395       |   | micro       | microchr4   | 3.70E-162 |

853 Table S3. Number, length, and percentage of annotated repeat elements identified.

| Families of repeat elements       | Numbers of elements | Length masked (bp) | % of sequence | % element masked |
|-----------------------------------|---------------------|--------------------|---------------|------------------|
| <b>Retroelements</b>              | 2,082,017           | 451,287,018        | 23.83         | 20.37            |
| <b>SINEs</b>                      | 648,720             | 89,280,596         | 4.72          | 6.35             |
| Penelope                          | 254,722             | 35,799,757         | 1.89          | 2.50             |
| <b>LINEs</b>                      | 1,311,944           | 319,965,632        | 16.90         | 12.84            |
| L2/CR1/Rex                        | 702,907             | 160,952,766        | 8.50          | 6.88             |
| R1/LOA/Jockey                     | 36                  | 3,068              | 0.00          | 0.00             |
| R2/R4/NeSL                        | 5,129               | 640,551            | 0.03          | 0.05             |
| RTE/Bov-B                         | 257,696             | 83,172,778         | 4.39          | 2.52             |
| L1/CIN4                           | 87,958              | 38,708,200         | 2.04          | 0.86             |
| <b>LTR elements</b>               | 121,353             | 42,040,790         | 2.22          | 1.19             |
| BEL/Pao                           | 4,074               | 768,559            | 0.04          | 0.04             |
| Ty1/Copia                         | 18,376              | 7,918,963          | 0.42          | 0.18             |
| Gypsy/DIRS1                       | 39,227              | 14,661,509         | 0.77          | 0.38             |
| Retroviral                        | 34,521              | 5,663,234          | 0.30          | 0.34             |
| <b>DNA transposons</b>            | 1,527,111           | 204,435,133        | 10.80         | 14.94            |
| hobo-Activator                    | 610,832             | 73,847,731         | 3.90          | 5.98             |
| Tc1-IS630-Pogo                    | 314,462             | 42,728,561         | 2.26          | 3.08             |
| PiggyBac                          | 1,795               | 445,424            | 0.02          | 0.02             |
| Tourist/Harbinger                 | 500,329             | 78,020,620         | 4.12          | 4.90             |
| <b>Unclassified</b>               | 828,472             | 146,176,330        | 7.72          | 8.11             |
| <b>Total interspersed repeats</b> | 9,351,681           | 801,898,481        | 42.35         | 91.51            |
| Small RNA                         | 33,490              | 3,376,969          | 0.18          | 0.33             |
| Satellites                        | 51,860              | 7,242,936          | 0.38          | 0.51             |
| Simple repeats                    | 705,413             | 27,116,672         | 1.43          | 6.90             |
| Low complexity                    | 77,452              | 3,957,871          | 0.21          | 0.76             |

|                     |            |             |       |        |
|---------------------|------------|-------------|-------|--------|
| <b>Total masked</b> | 10,219,896 | 841,750,763 | 44.45 | 100.00 |
|---------------------|------------|-------------|-------|--------|

854

855 Table S4: Comparison of molecular pathways analysis on macrochromosomes and microchromosomes. Second  
 856 column shows the specific pathways identified on each chromosome. Third column shows the pathways that belong  
 857 to specific group of chromosomes.

| Chromosome location | Specific pathways for each chromosome                                                                               | Specific pathways for macros versus micros                                                                                                                                                                |
|---------------------|---------------------------------------------------------------------------------------------------------------------|-----------------------------------------------------------------------------------------------------------------------------------------------------------------------------------------------------------|
| Chromosome 1        | Allantoin degradation (P02725), Methionine biosynthesis (P02753)                                                    | 5-Hydroxytryptamine biosynthesis (P04371), Acetate utilization (P02722), Activin beta signaling pathway (P06210), Anandamide degradation (P05728),                                                        |
| Chromosome 2        | ALP23B signaling pathway (P06209), GBB signaling pathway (P06214), MYO signaling pathway (P06215)                   | Androgen/estrogene/progesterone biosynthesis (P02727), Ascorbate degradation (P02729), ATP synthesis (P02721), Biotin biosynthesis (P02731),                                                              |
| Chromosome 3        | Cysteine biosynthesis (P02737), Lysine biosynthesis (P02751)                                                        | BMP/activin signaling pathway-drosophila (P06211), DPP signaling pathway (P06213), DPP-SCW signaling pathway (P06212), Glutamine glutamate conversion (P02745), Isoleucine biosynthesis (P02748), Leucine |
| Chromosome 4        | Thiamin metabolism (P02780)                                                                                         | biosynthesis (P02749), Methylmalonyl pathway (P02755), Proline biosynthesis (P02768), Purine                                                                                                              |
| Chromosome 5        | Cobalamin biosynthesis (P02735), Sulfate assimilation (P02778)                                                      | metabolism (P02769), Pyridoxal phosphate salvage pathway (P02770), Pyridoxal-5-phosphate biosynthesis (P02759), SCW signaling pathway (P06216), Succinate                                                 |
| Chromosome 6        | Carnitine metabolism (P02733), Coenzyme A linked carnitine metabolism (P02732), and Threonine biosynthesis (P02781) | to proprionate conversion (P02777), Toll pathway-drosophila (P06217), Valine biosynthesis (P02785), and Vitamin B6 metabolism (P02787)                                                                    |
| Microchromosome 1   | None.                                                                                                               | None.                                                                                                                                                                                                     |
| Microchromosome 2   | Tyrosine biosynthesis (P02784)                                                                                      |                                                                                                                                                                                                           |
| Microchromosome 3   | None.                                                                                                               |                                                                                                                                                                                                           |

---

|                     |                            |
|---------------------|----------------------------|
|                     | Bupropion degradation      |
| Microchromosome 4   | (P05729)                   |
|                     | Triacylglycerol metabolism |
| Microchromosome 5   | (P02782)                   |
| Microchromosome 6   | None.                      |
| Microchromosome 7   | None.                      |
| Microchromosome 8   | None.                      |
| Microchromosome 9/X | None.                      |
| Microchromosome 10  | None.                      |
| Microchromosome 11  | None.                      |

---

858

859

860

861 Table S5. Genome assemblies and number of markers used for *in silico* painting. All assemblies are  
 862 available through NCBI under the appropriate accession.

| Organism               | Potential<br>single<br>markers | Total confirmed (5<br>consecutive)<br>markers | Scaffolds with<br>confirmed<br>homologies | Confirmed<br>markers in<br>Scaffolds (%) | Assembly<br>accession |
|------------------------|--------------------------------|-----------------------------------------------|-------------------------------------------|------------------------------------------|-----------------------|
| <i>A. carolinensis</i> | 2,616,045                      | 87,155                                        | 13                                        | 57,006<br>(65.41)                        | GCA_000090745.2       |
| <i>S. merianae</i>     | 390,847                        | 31,955                                        | 19                                        | 31,805<br>(99.53)                        | GCA_003586115.2       |
| <i>L. agilis</i>       | 755,639                        | 44,200                                        | 20                                        | 44,199<br>(99.99)                        | GCA_009819535.1       |
| <i>P. muralis</i>      | 719,822                        | 46,093                                        | 19                                        | 45,731<br>(99.21)                        | GCA_004329235.1       |
| <i>Z. vivipara</i>     | 751,121                        | 43,371                                        | 19                                        | 42,224<br>(97.35)                        | GCA_011800845.1       |
| <i>C. viridis</i>      | 299,173                        | 18,161                                        | 18                                        | 17,891<br>(98.51)                        | GCA_003400415.2       |
| <i>T. elegans</i>      | 282,458                        | 17,817                                        | 18                                        | 17,725<br>(99.48)                        | GCA_009769535.1       |
| <i>N. naja</i>         | 291,209                        | 19,898                                        | 19                                        | 19,805<br>(99.52)                        | GCA_009733165.1       |
| <i>T. scripta</i>      | 177,241                        | 15,287                                        | 25                                        | 15,252<br>(99.77)                        | GCA_013100865.1       |
| <i>G. evgoodei</i>     | 152,748                        | 14,864                                        | 24                                        | 14,614<br>(98.32)                        | GCA_007399415.1       |
| <i>D. coriacea</i>     | 137,161                        | 14,075                                        | 29                                        | 14,075<br>(100.00)                       | GCA_009764565.3       |
| <i>G. gallus</i>       | 88,397                         | 10,934                                        | 33                                        | 10,934<br>(100.00)                       | GCA_000002315.5       |

863



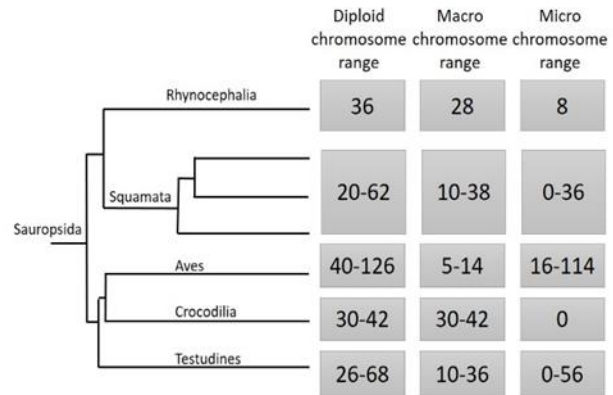

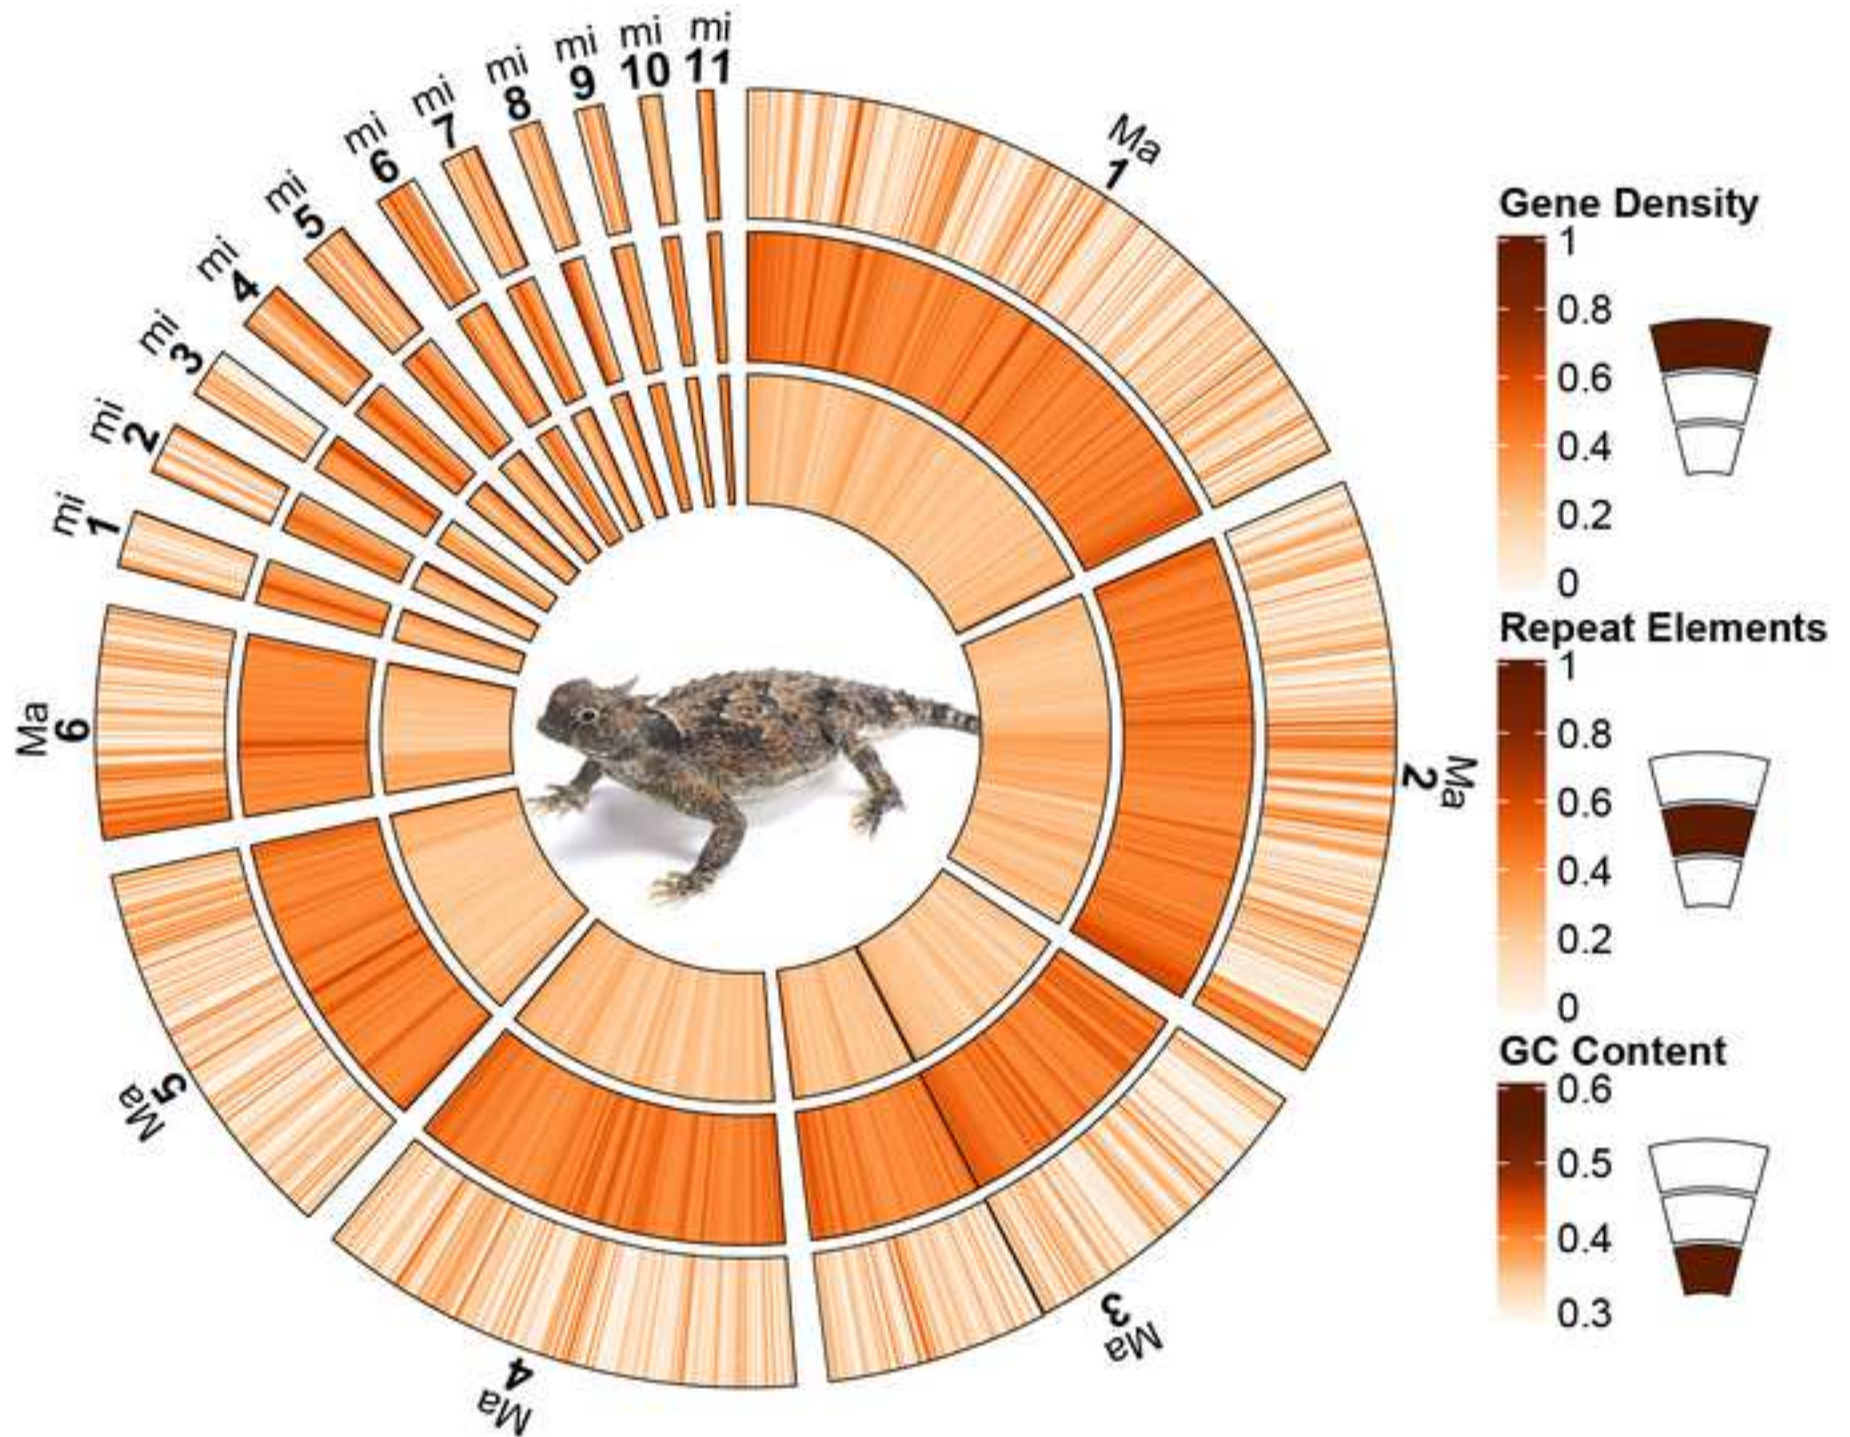

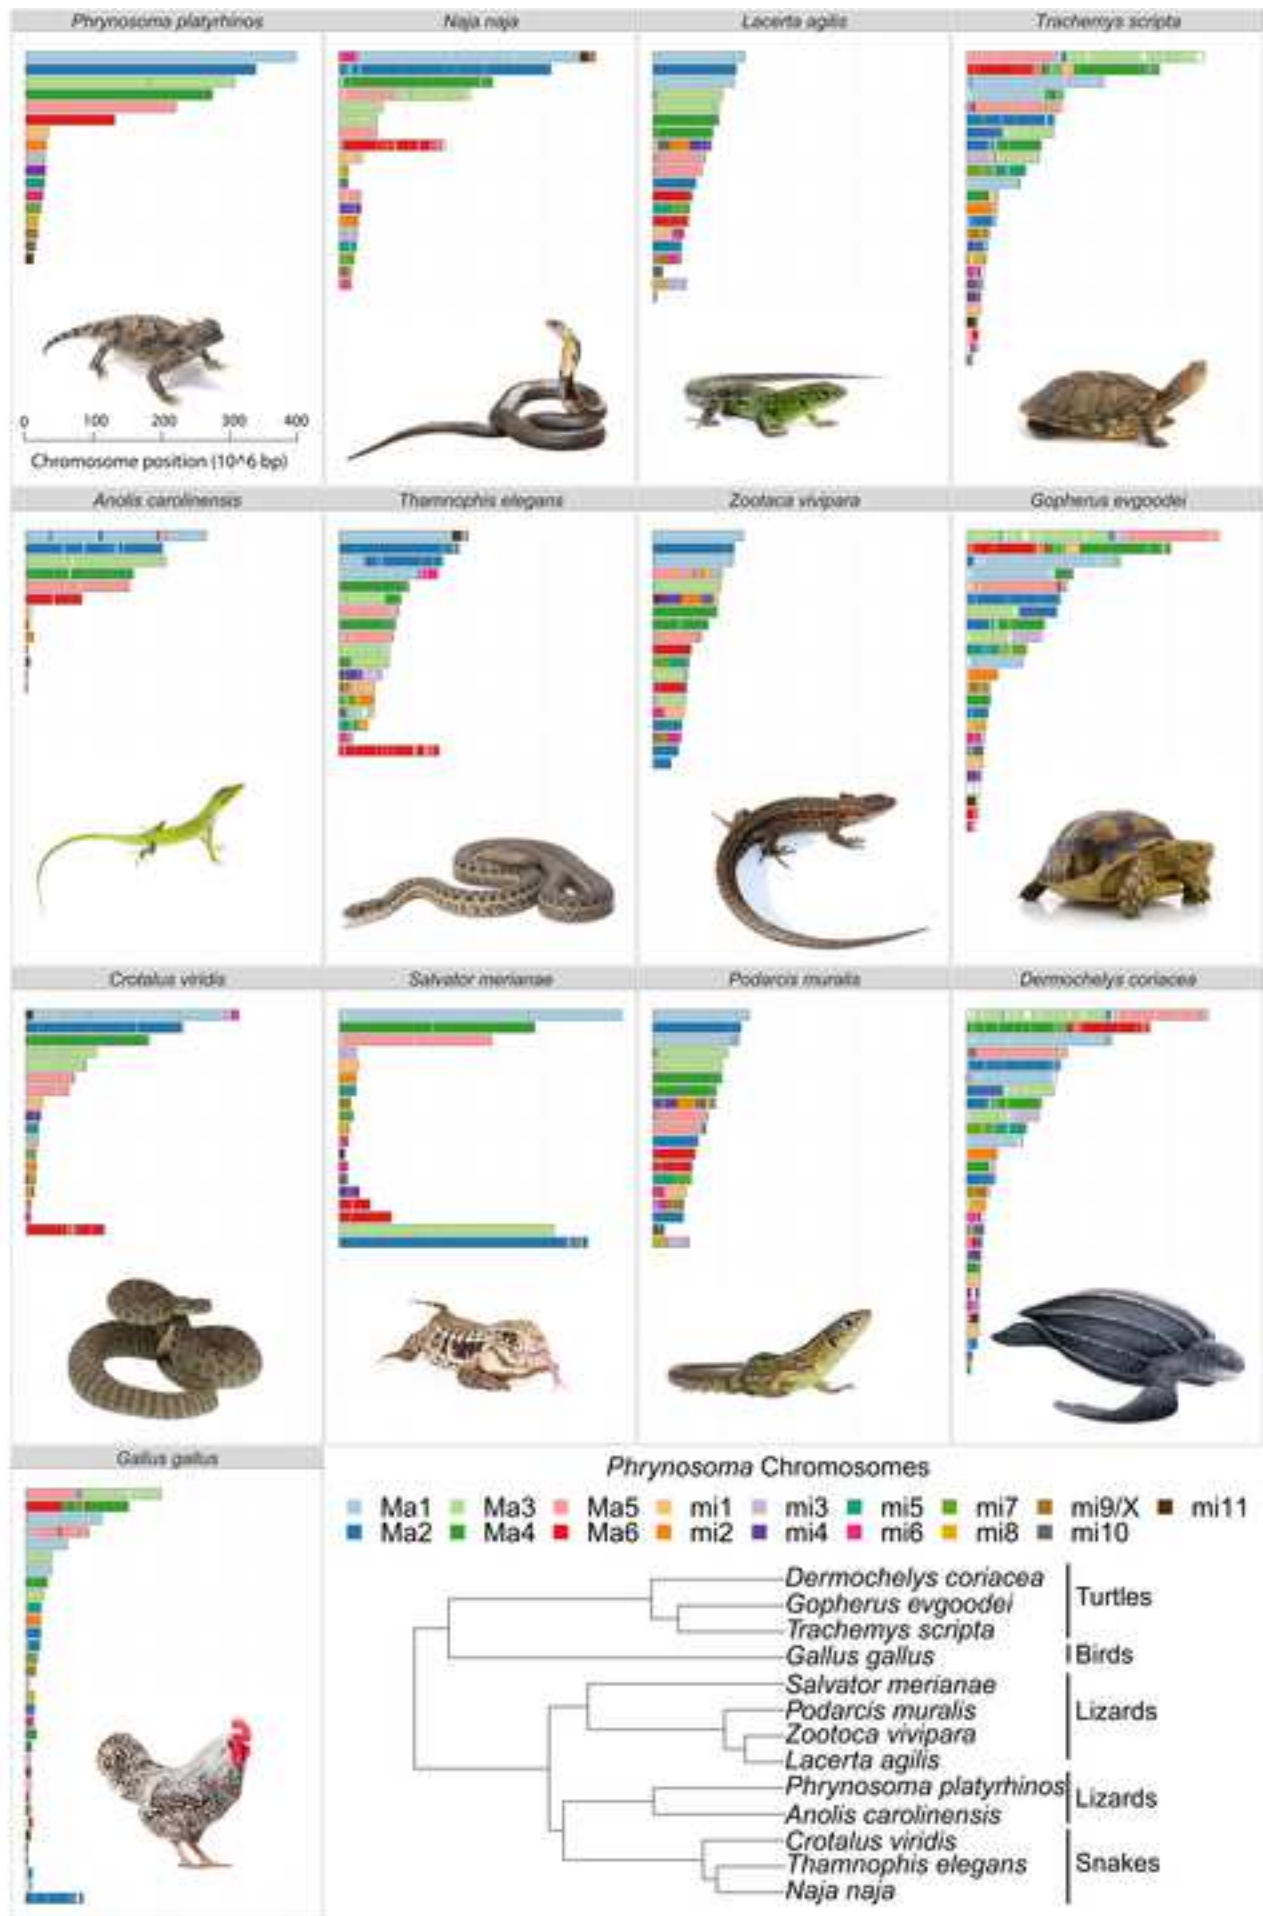



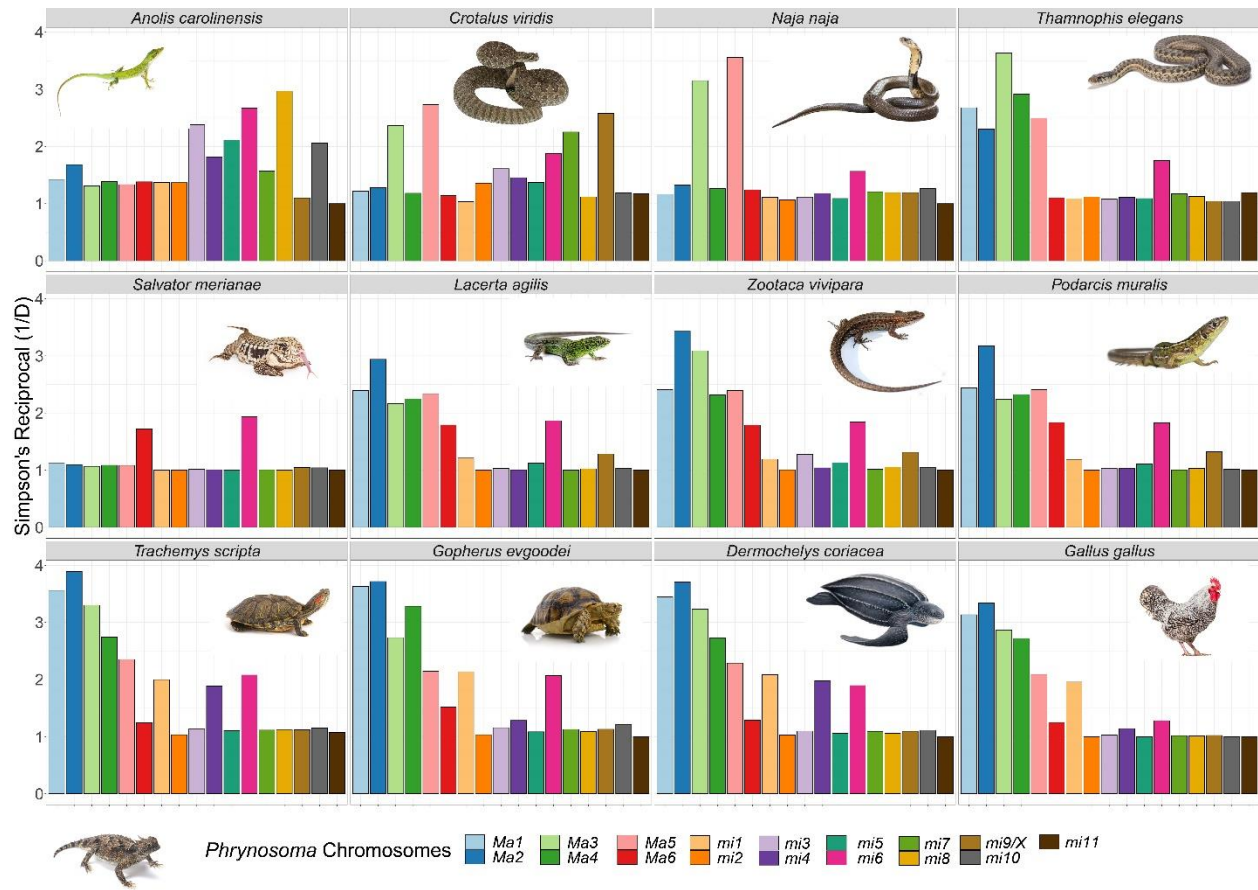

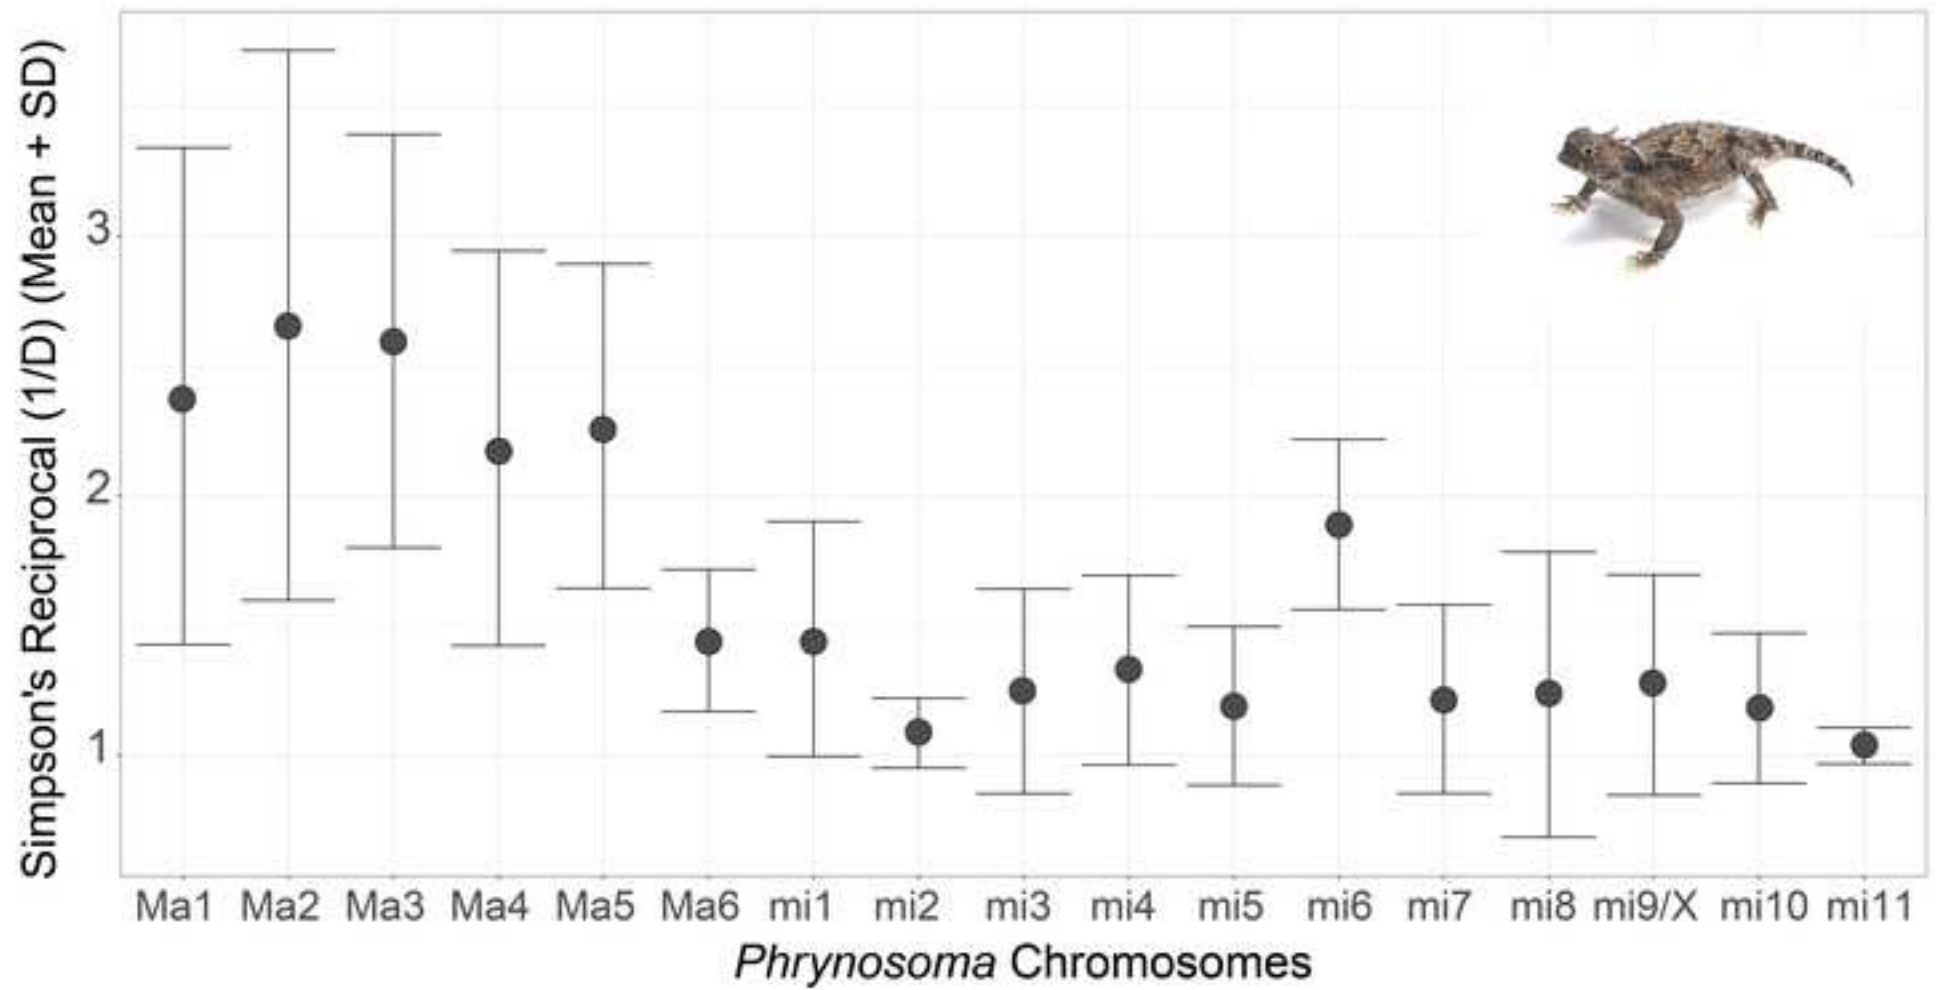

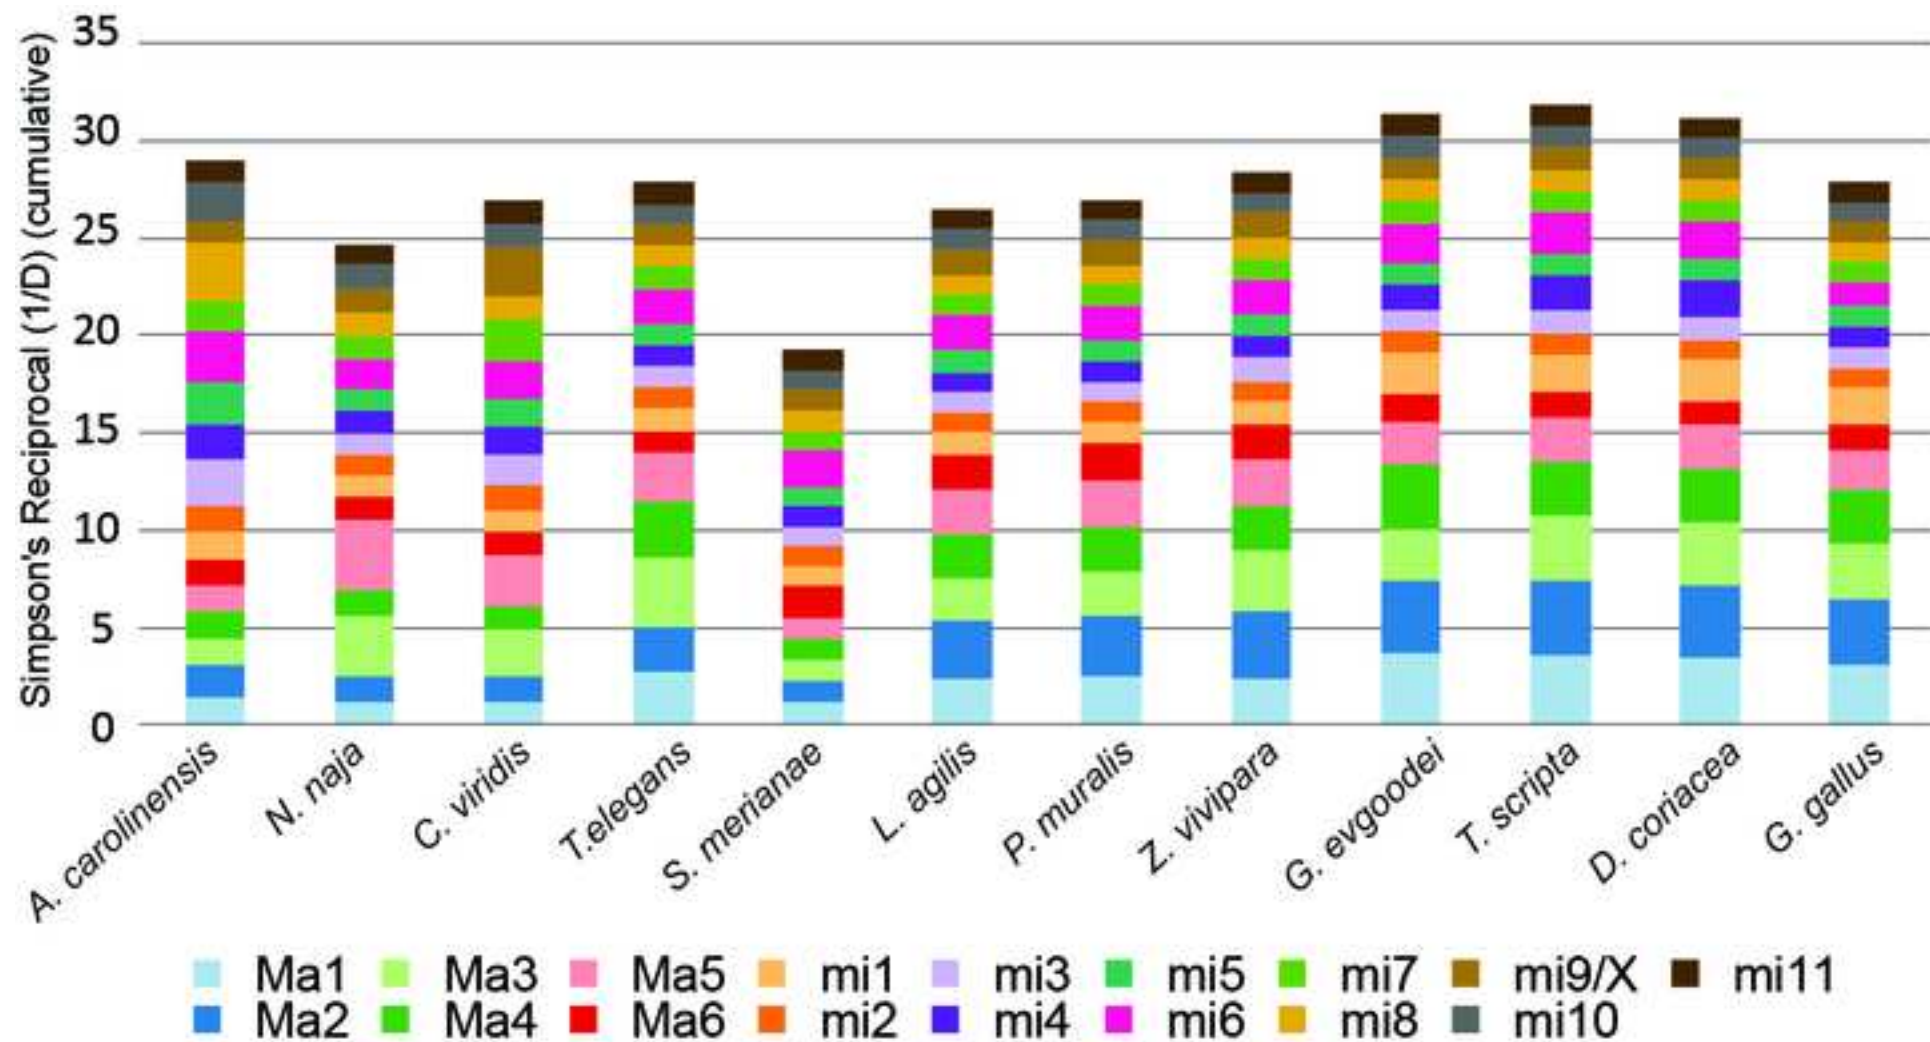

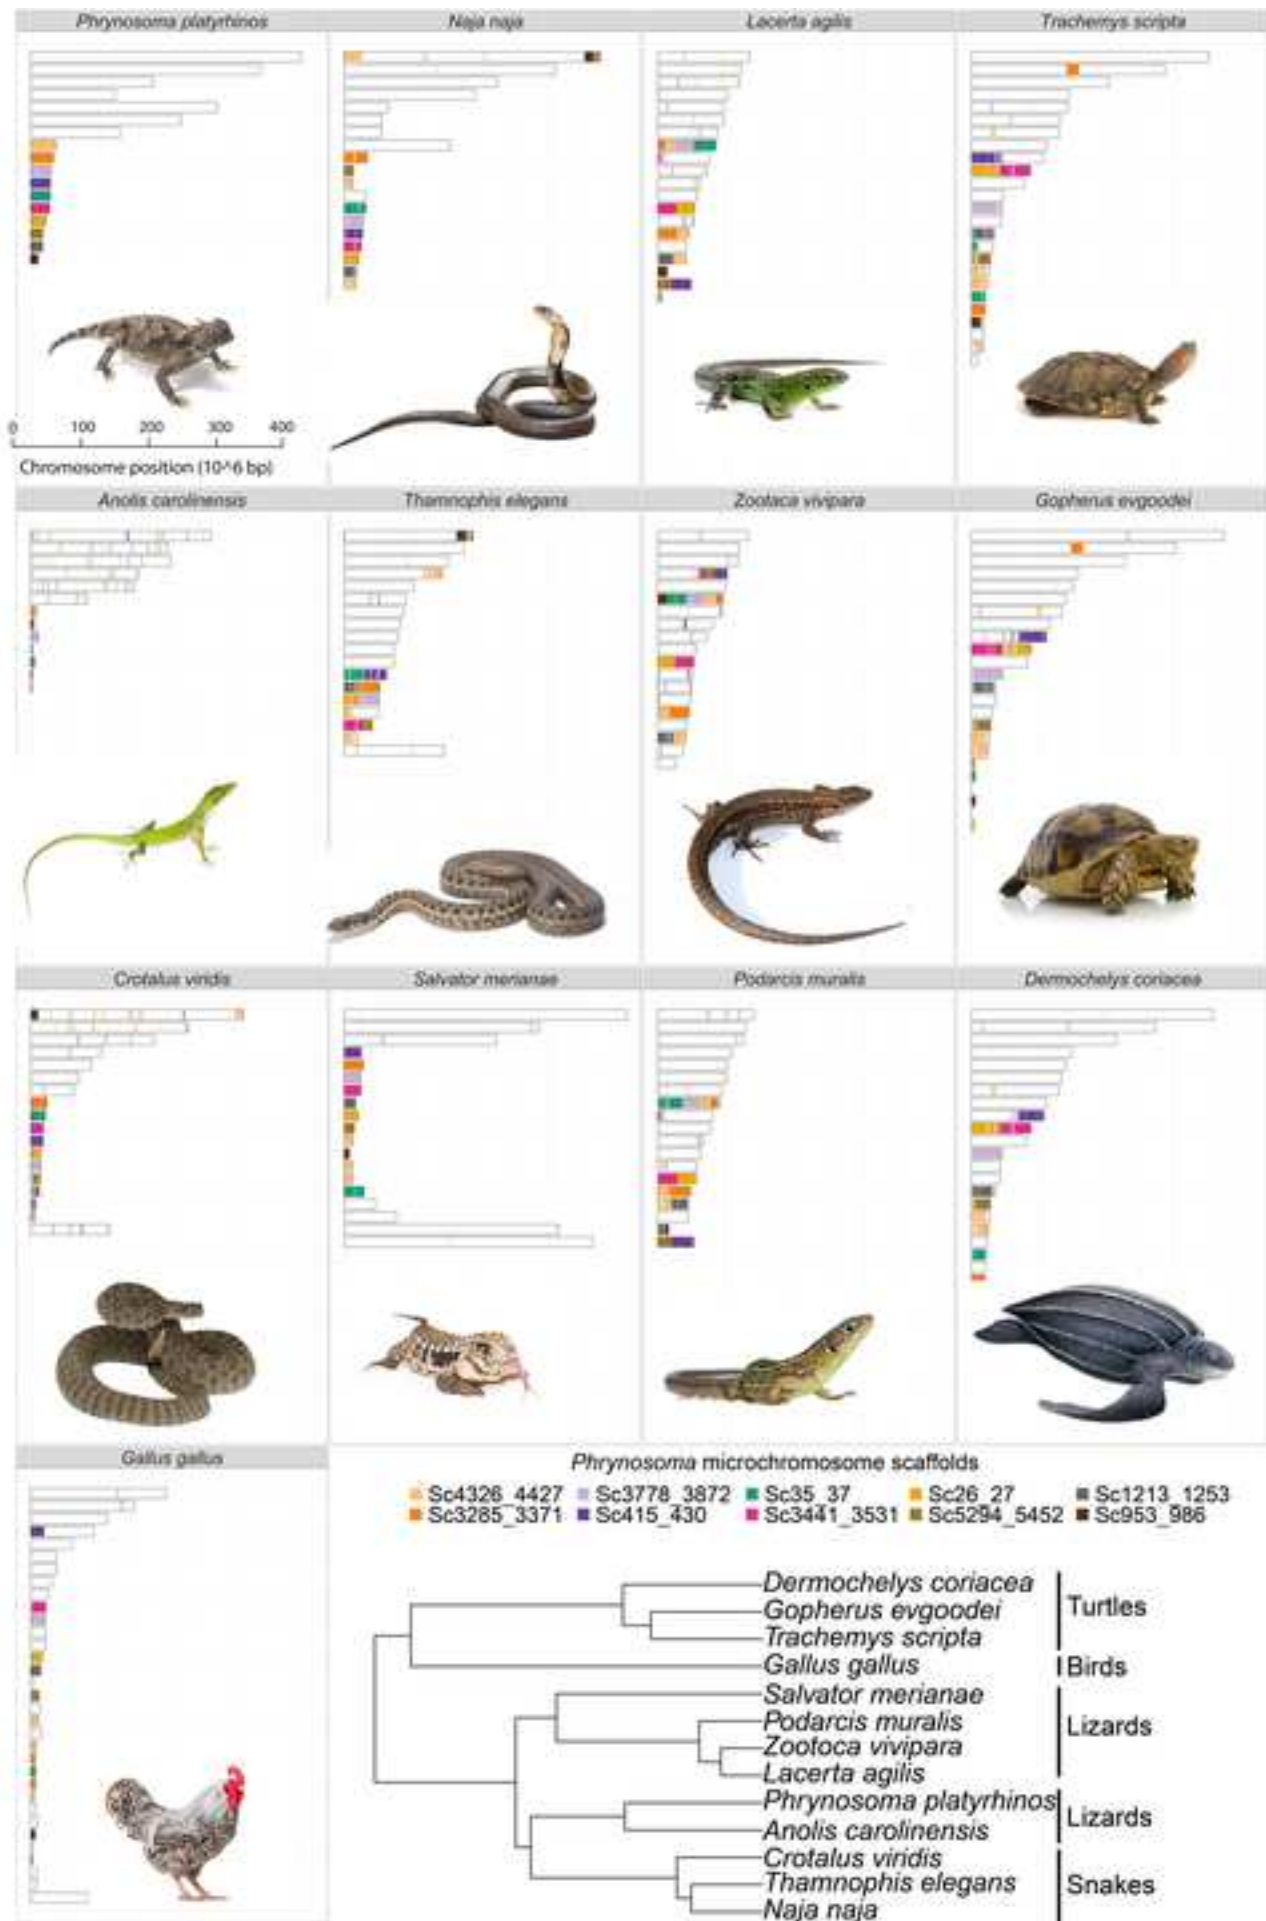

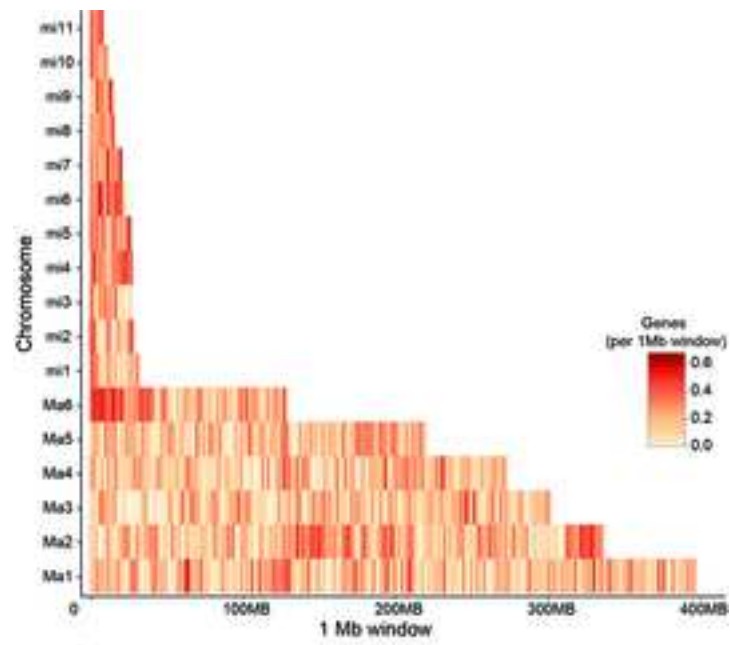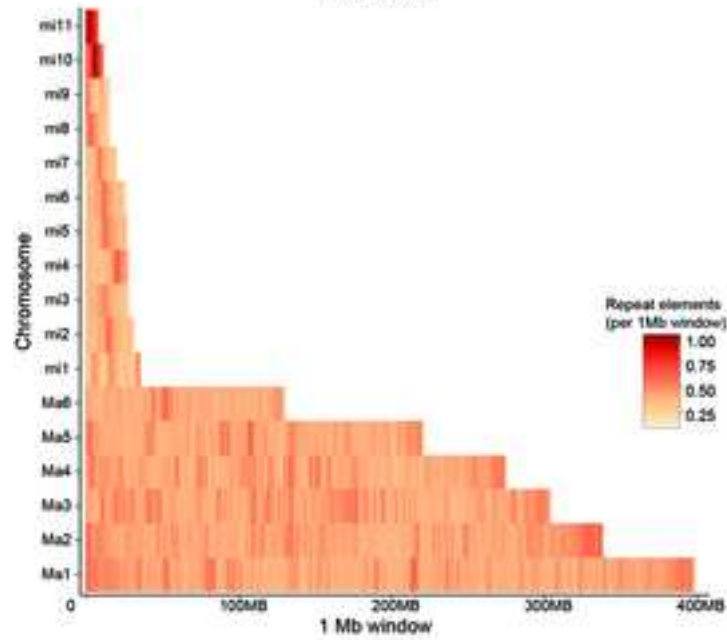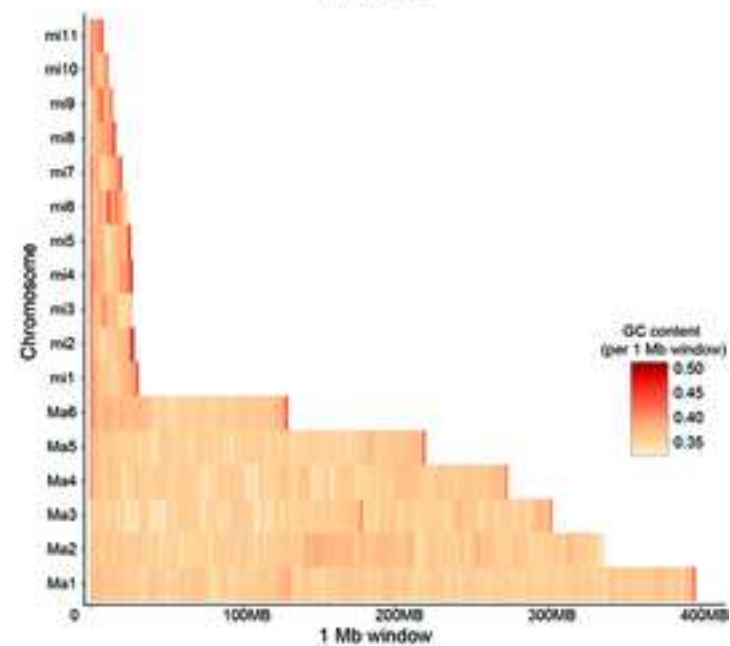



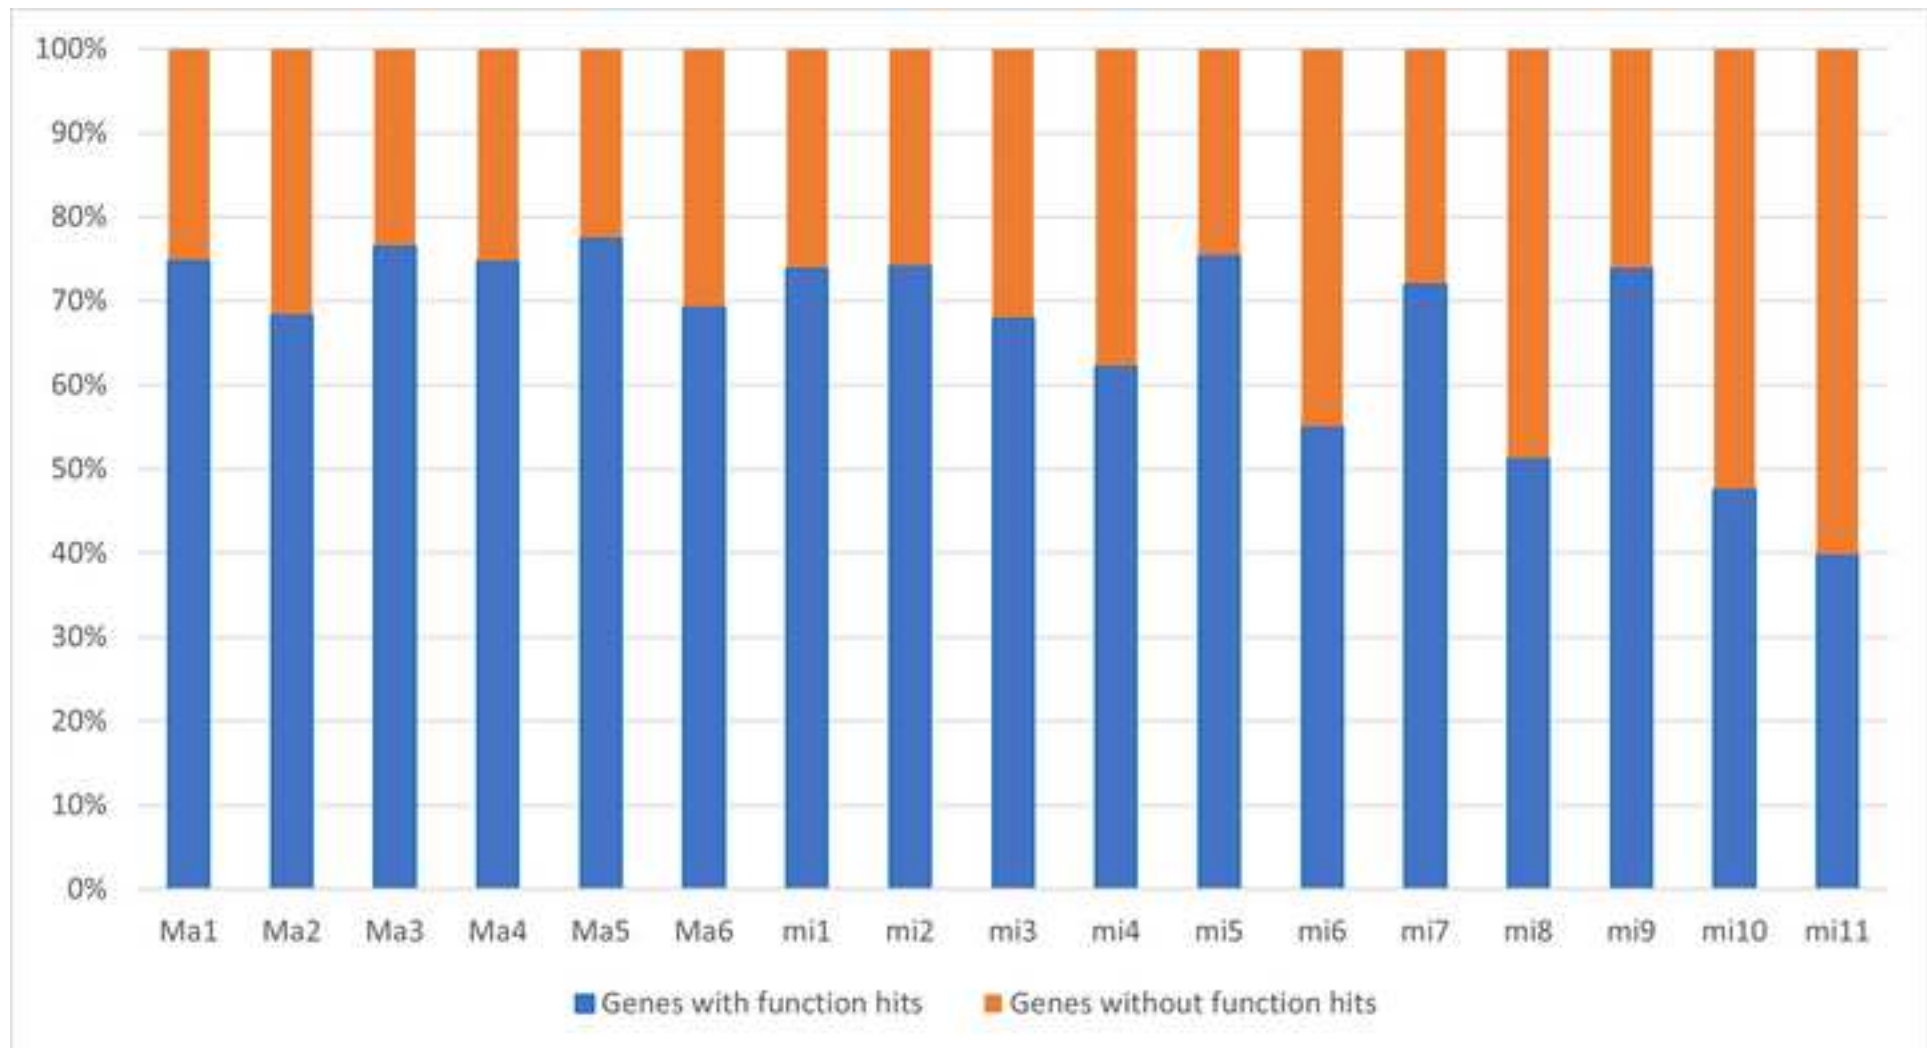

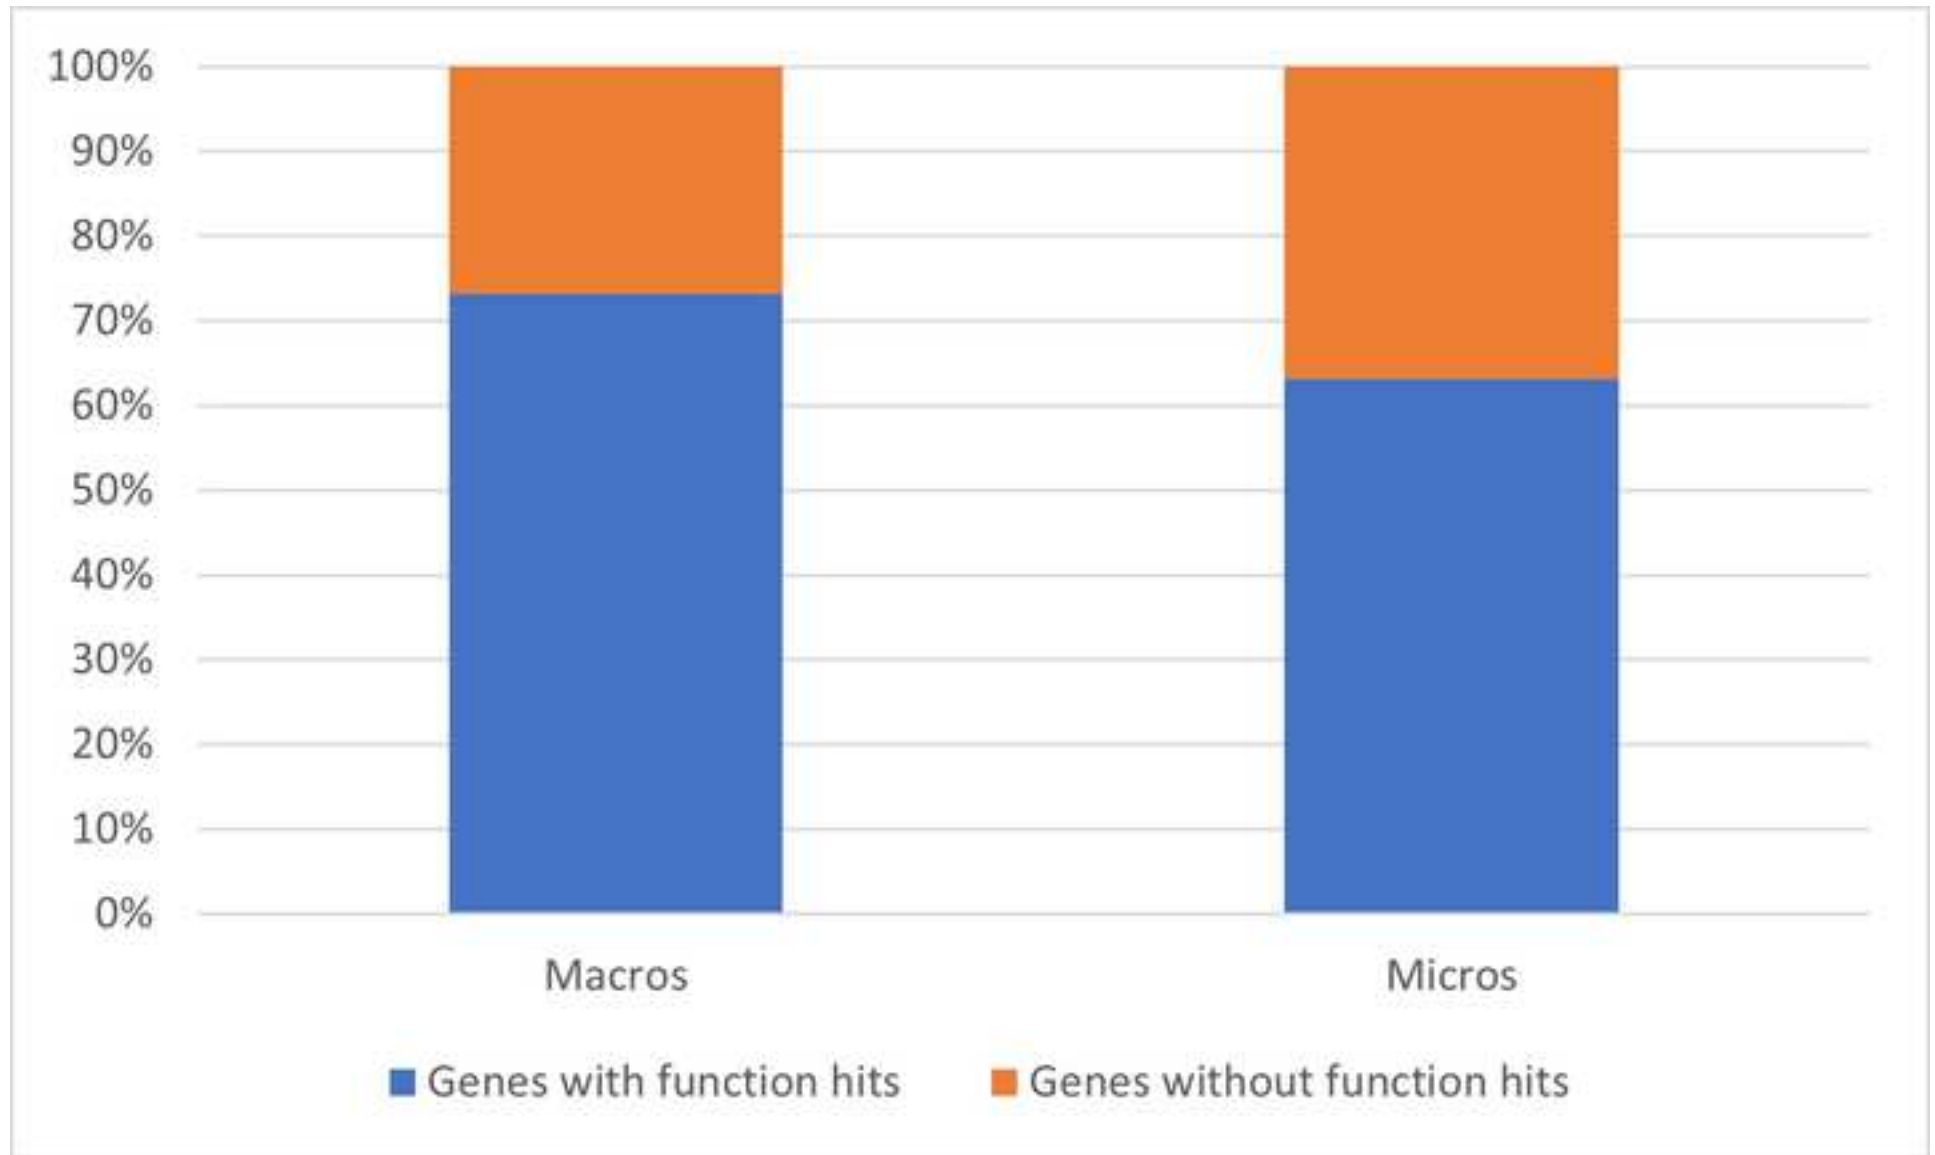

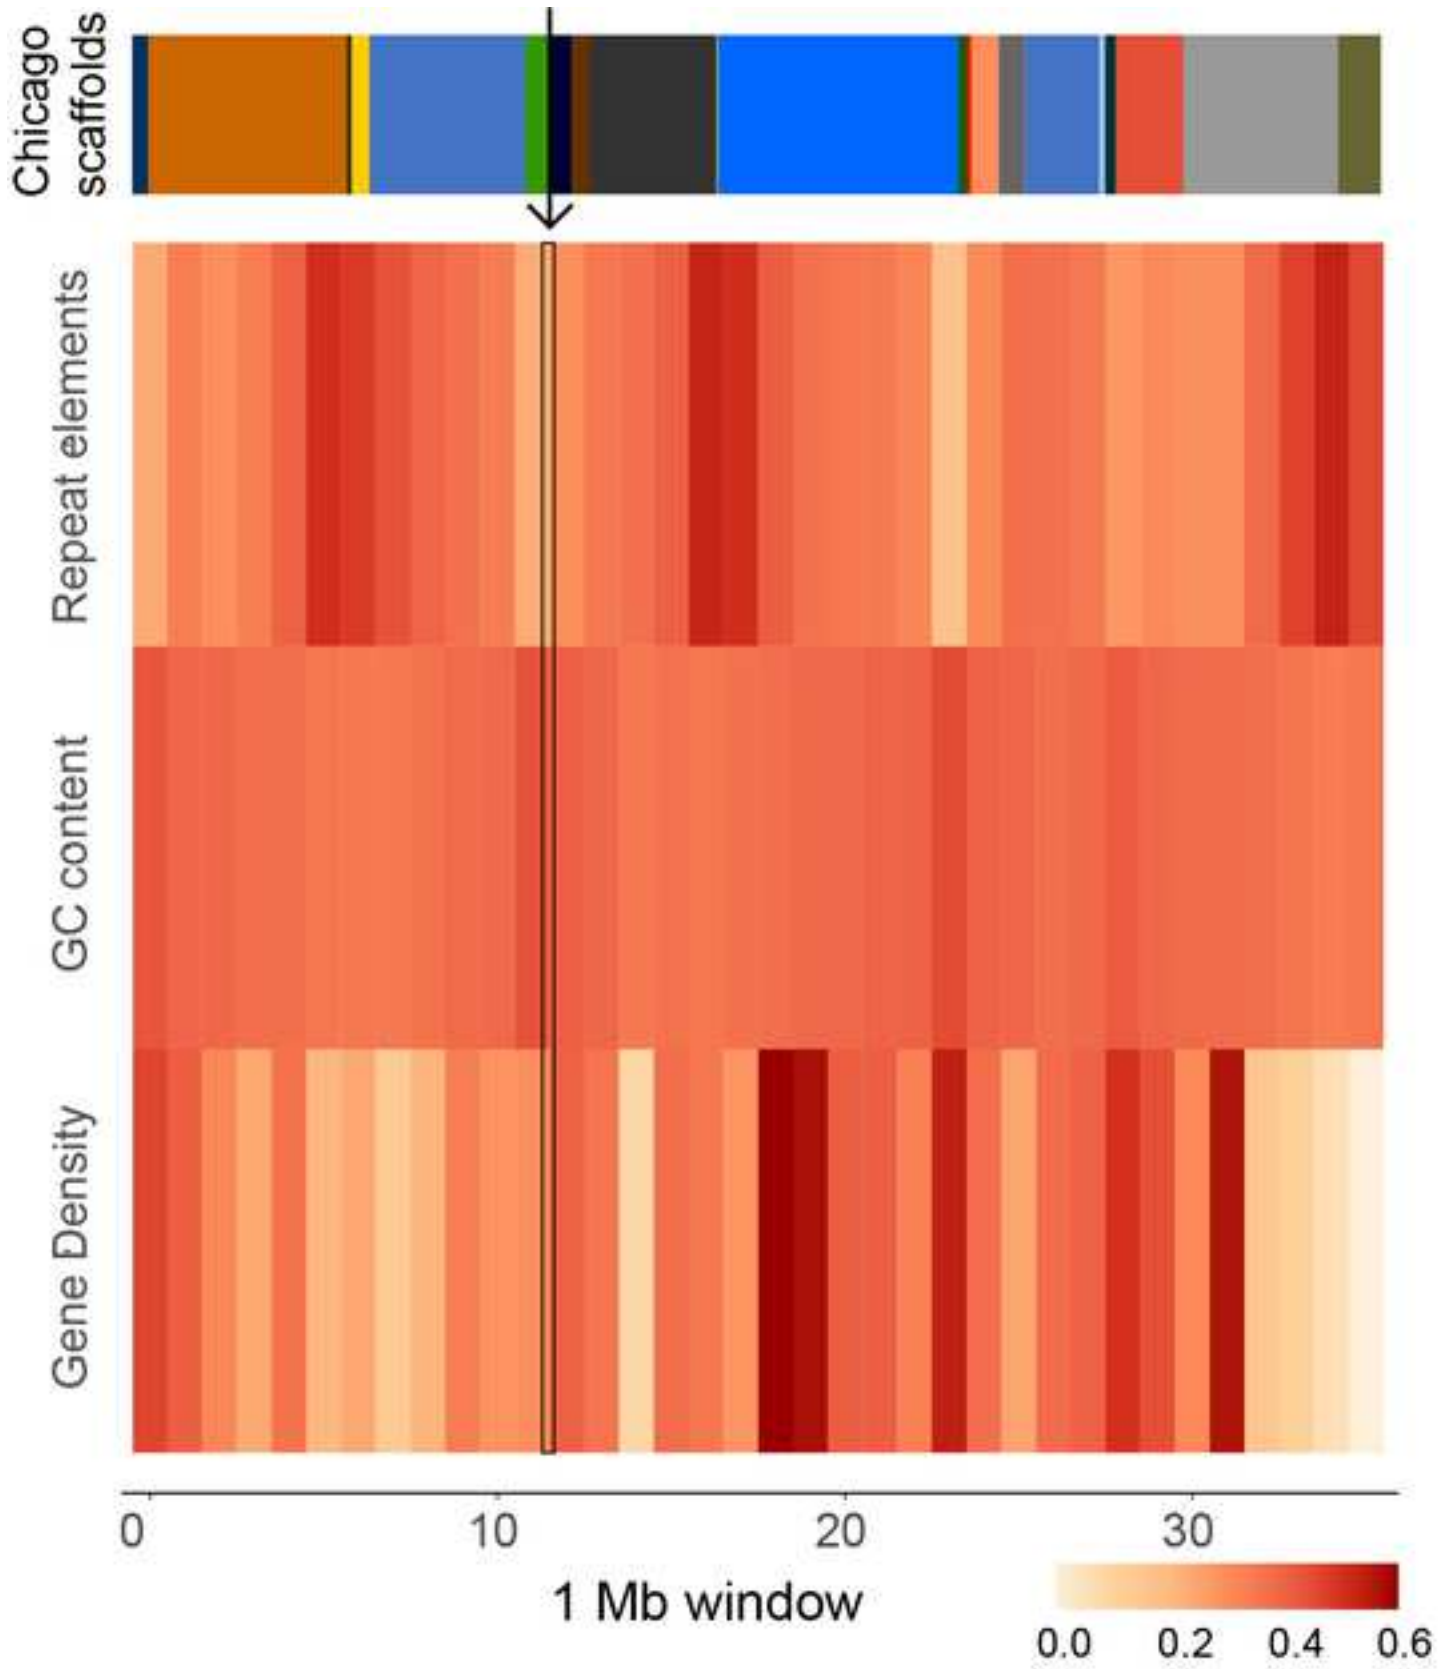

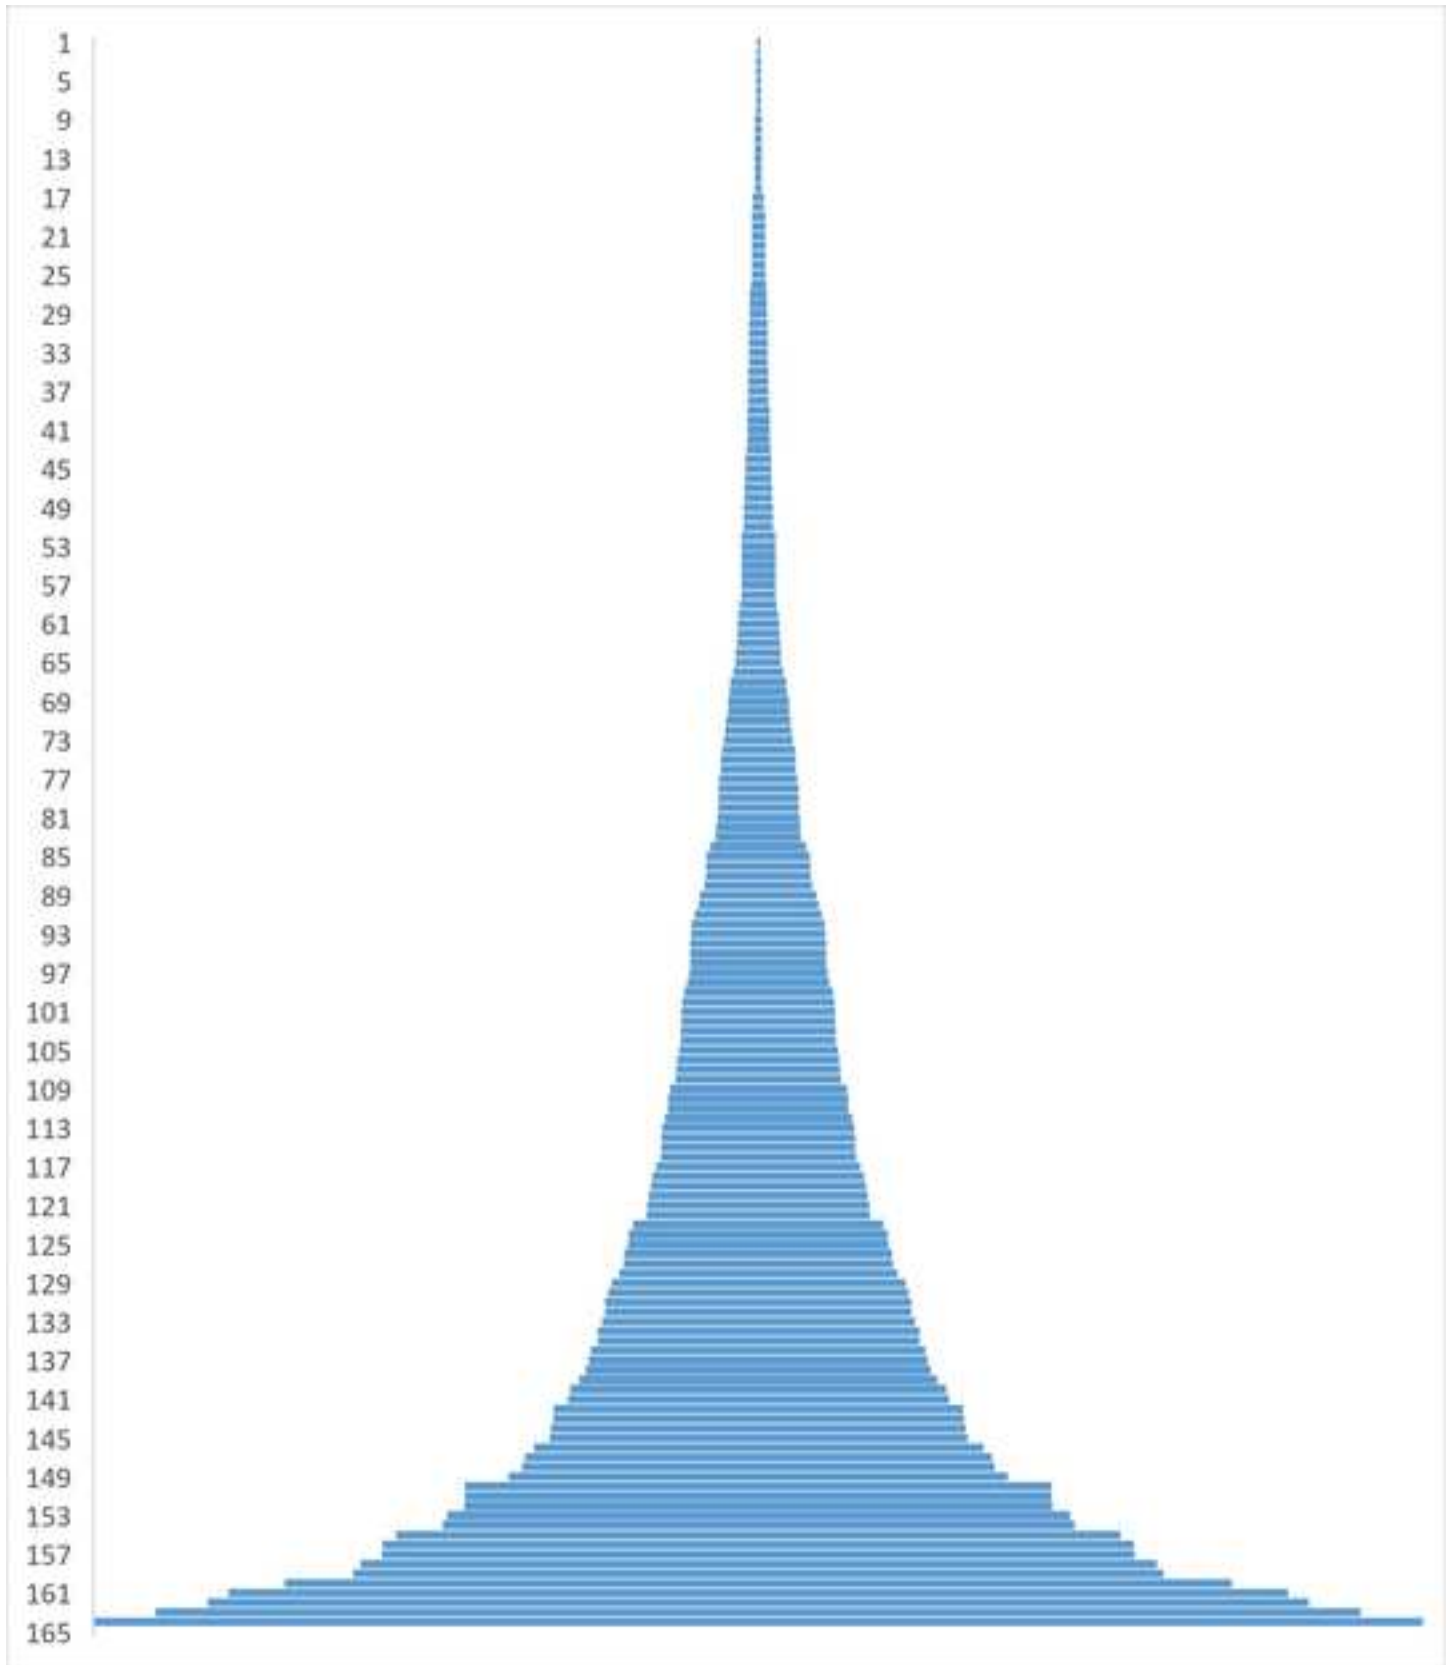

Supplement: giab098_giga-d-21-00044_revision_1.pdf [file giab098_giga-d-21-00044_revision_1.pdf]
