# Supplementary material for: A chromosome-level genome assembly and annotation of the desert horned lizard, Phrynosoma platyrhinos, provides insight into chromosomal rearrangements among reptiles
Source: PubMed Central journal article supplement (PMC8848323; doi:10.1093/gigascience/giab098), 2022-02-04

# GigaScience

## A chromosome-level genome assembly and annotation of the desert horned lizard, *Phrynosoma platyrhinos*, provides insight into chromosomal rearrangements among reptiles

--Manuscript Draft--

|                                                      |                                                                                                                                                                                                                                                                                                                                                                                                                                                                                                                                                                                                                                                                                                                                                                                                                                                                                                                                                                                                                                                                                                                                                                                                                                                                                                                                                                                                                                                                                                                                                                                                                                                                                                                                                                                                                                                                                                                                                                                                         |                   |
|------------------------------------------------------|---------------------------------------------------------------------------------------------------------------------------------------------------------------------------------------------------------------------------------------------------------------------------------------------------------------------------------------------------------------------------------------------------------------------------------------------------------------------------------------------------------------------------------------------------------------------------------------------------------------------------------------------------------------------------------------------------------------------------------------------------------------------------------------------------------------------------------------------------------------------------------------------------------------------------------------------------------------------------------------------------------------------------------------------------------------------------------------------------------------------------------------------------------------------------------------------------------------------------------------------------------------------------------------------------------------------------------------------------------------------------------------------------------------------------------------------------------------------------------------------------------------------------------------------------------------------------------------------------------------------------------------------------------------------------------------------------------------------------------------------------------------------------------------------------------------------------------------------------------------------------------------------------------------------------------------------------------------------------------------------------------|-------------------|
| <b>Manuscript Number:</b>                            | GIGA-D-21-00044R2                                                                                                                                                                                                                                                                                                                                                                                                                                                                                                                                                                                                                                                                                                                                                                                                                                                                                                                                                                                                                                                                                                                                                                                                                                                                                                                                                                                                                                                                                                                                                                                                                                                                                                                                                                                                                                                                                                                                                                                       |                   |
| <b>Full Title:</b>                                   | A chromosome-level genome assembly and annotation of the desert horned lizard, <i>Phrynosoma platyrhinos</i> , provides insight into chromosomal rearrangements among reptiles                                                                                                                                                                                                                                                                                                                                                                                                                                                                                                                                                                                                                                                                                                                                                                                                                                                                                                                                                                                                                                                                                                                                                                                                                                                                                                                                                                                                                                                                                                                                                                                                                                                                                                                                                                                                                          |                   |
| <b>Article Type:</b>                                 | Research                                                                                                                                                                                                                                                                                                                                                                                                                                                                                                                                                                                                                                                                                                                                                                                                                                                                                                                                                                                                                                                                                                                                                                                                                                                                                                                                                                                                                                                                                                                                                                                                                                                                                                                                                                                                                                                                                                                                                                                                |                   |
| <b>Funding Information:</b>                          | Miami University                                                                                                                                                                                                                                                                                                                                                                                                                                                                                                                                                                                                                                                                                                                                                                                                                                                                                                                                                                                                                                                                                                                                                                                                                                                                                                                                                                                                                                                                                                                                                                                                                                                                                                                                                                                                                                                                                                                                                                                        | Dr Tereza Jezkova |
|                                                      | National Science Foundation Graduate Research Fellowship Program (2037786)                                                                                                                                                                                                                                                                                                                                                                                                                                                                                                                                                                                                                                                                                                                                                                                                                                                                                                                                                                                                                                                                                                                                                                                                                                                                                                                                                                                                                                                                                                                                                                                                                                                                                                                                                                                                                                                                                                                              | Mr Keaka Farleigh |
| <b>Abstract:</b>                                     | <p><b>Background</b> . The increasing number of chromosome-level genome assemblies has advanced our knowledge and understanding of macroevolutionary processes. Here, we introduce the genome of the desert horned lizard, <i>Phrynosoma platyrhinos</i>, an iguanid lizard occupying extreme desert conditions of the American southwest. We conduct analysis of the chromosomal structure and composition of this species and compare these features across genomes of 12 other reptiles (5 species of lizards, 3 snakes, 3 turtles, and 1 bird).</p> <p><b>Findings</b> . The desert horned lizard genome was sequenced using Illumina paired-end reads and assembled and scaffolded using Dovetail Genomics Hi-C and Chicago long-range contact data. The resulting genome assembly has a total length of 1,901.85 Mb, scaffold N50 length of 273.213 Mb, and includes 5,294 scaffolds. The chromosome-level assembly is composed of 6 macrochromosomes and 11 microchromosomes. A total of 20,764 genes were annotated in the assembly. GC content and gene density are higher for microchromosomes than macrochromosomes, while repeat element distributions show the opposite trend. Pathway analyses provide preliminary evidence that microchromosome and macrochromosome gene content are functionally distinct. Synteny analysis indicates that large microchromosome blocks are conserved among closely related species, whereas macrochromosomes show evidence of frequent fusion and fission events among reptiles, even between closely related species.</p> <p><b>Conclusions</b> : Our results demonstrate dynamic karyotypic evolution across Reptilia, with frequent inferred splits, fusions, and rearrangements that have resulted in shuffling of chromosomal blocks between macrochromosomes and microchromosomes. Our analyses also provide new evidence for distinct gene content and chromosomal structure between microchromosomes and macrochromosomes within reptiles.</p> |                   |
| <b>Corresponding Author:</b>                         | Nazila Koochekian<br>Miami University College of Arts and Science<br>Oxford, OH UNITED STATES                                                                                                                                                                                                                                                                                                                                                                                                                                                                                                                                                                                                                                                                                                                                                                                                                                                                                                                                                                                                                                                                                                                                                                                                                                                                                                                                                                                                                                                                                                                                                                                                                                                                                                                                                                                                                                                                                                           |                   |
| <b>Corresponding Author Secondary Information:</b>   |                                                                                                                                                                                                                                                                                                                                                                                                                                                                                                                                                                                                                                                                                                                                                                                                                                                                                                                                                                                                                                                                                                                                                                                                                                                                                                                                                                                                                                                                                                                                                                                                                                                                                                                                                                                                                                                                                                                                                                                                         |                   |
| <b>Corresponding Author's Institution:</b>           | Miami University College of Arts and Science                                                                                                                                                                                                                                                                                                                                                                                                                                                                                                                                                                                                                                                                                                                                                                                                                                                                                                                                                                                                                                                                                                                                                                                                                                                                                                                                                                                                                                                                                                                                                                                                                                                                                                                                                                                                                                                                                                                                                            |                   |
| <b>Corresponding Author's Secondary Institution:</b> |                                                                                                                                                                                                                                                                                                                                                                                                                                                                                                                                                                                                                                                                                                                                                                                                                                                                                                                                                                                                                                                                                                                                                                                                                                                                                                                                                                                                                                                                                                                                                                                                                                                                                                                                                                                                                                                                                                                                                                                                         |                   |
| <b>First Author:</b>                                 | Nazila Koochekian                                                                                                                                                                                                                                                                                                                                                                                                                                                                                                                                                                                                                                                                                                                                                                                                                                                                                                                                                                                                                                                                                                                                                                                                                                                                                                                                                                                                                                                                                                                                                                                                                                                                                                                                                                                                                                                                                                                                                                                       |                   |
| <b>First Author Secondary Information:</b>           |                                                                                                                                                                                                                                                                                                                                                                                                                                                                                                                                                                                                                                                                                                                                                                                                                                                                                                                                                                                                                                                                                                                                                                                                                                                                                                                                                                                                                                                                                                                                                                                                                                                                                                                                                                                                                                                                                                                                                                                                         |                   |
| <b>Order of Authors:</b>                             | Nazila Koochekian                                                                                                                                                                                                                                                                                                                                                                                                                                                                                                                                                                                                                                                                                                                                                                                                                                                                                                                                                                                                                                                                                                                                                                                                                                                                                                                                                                                                                                                                                                                                                                                                                                                                                                                                                                                                                                                                                                                                                                                       |                   |
|                                                      | Alfredo Ascanio                                                                                                                                                                                                                                                                                                                                                                                                                                                                                                                                                                                                                                                                                                                                                                                                                                                                                                                                                                                                                                                                                                                                                                                                                                                                                                                                                                                                                                                                                                                                                                                                                                                                                                                                                                                                                                                                                                                                                                                         |                   |
|                                                      | Keaka Farleigh                                                                                                                                                                                                                                                                                                                                                                                                                                                                                                                                                                                                                                                                                                                                                                                                                                                                                                                                                                                                                                                                                                                                                                                                                                                                                                                                                                                                                                                                                                                                                                                                                                                                                                                                                                                                                                                                                                                                                                                          |                   |
|                                                      | Daren C Card                                                                                                                                                                                                                                                                                                                                                                                                                                                                                                                                                                                                                                                                                                                                                                                                                                                                                                                                                                                                                                                                                                                                                                                                                                                                                                                                                                                                                                                                                                                                                                                                                                                                                                                                                                                                                                                                                                                                                                                            |                   |

|                                                                                                                                 |                                                                                                                                                                                                                                                                                                                                                                                                                                                                                                                                                                                                                                                                                                                                                                                                                                                                                                                                                                                                                                                                                                                                                                                                                                                                                                                                                                                                                                                                                                                                                                                                                                                                                                                                                                                                                                                                                                                                                                                                                                                                                                                                                                                                                                                                                                                                                                                                                                                                                                                                                                                                                                                                                                                                                                                                                                                         |
|---------------------------------------------------------------------------------------------------------------------------------|---------------------------------------------------------------------------------------------------------------------------------------------------------------------------------------------------------------------------------------------------------------------------------------------------------------------------------------------------------------------------------------------------------------------------------------------------------------------------------------------------------------------------------------------------------------------------------------------------------------------------------------------------------------------------------------------------------------------------------------------------------------------------------------------------------------------------------------------------------------------------------------------------------------------------------------------------------------------------------------------------------------------------------------------------------------------------------------------------------------------------------------------------------------------------------------------------------------------------------------------------------------------------------------------------------------------------------------------------------------------------------------------------------------------------------------------------------------------------------------------------------------------------------------------------------------------------------------------------------------------------------------------------------------------------------------------------------------------------------------------------------------------------------------------------------------------------------------------------------------------------------------------------------------------------------------------------------------------------------------------------------------------------------------------------------------------------------------------------------------------------------------------------------------------------------------------------------------------------------------------------------------------------------------------------------------------------------------------------------------------------------------------------------------------------------------------------------------------------------------------------------------------------------------------------------------------------------------------------------------------------------------------------------------------------------------------------------------------------------------------------------------------------------------------------------------------------------------------------------|
|                                                                                                                                 | Drew R Schield                                                                                                                                                                                                                                                                                                                                                                                                                                                                                                                                                                                                                                                                                                                                                                                                                                                                                                                                                                                                                                                                                                                                                                                                                                                                                                                                                                                                                                                                                                                                                                                                                                                                                                                                                                                                                                                                                                                                                                                                                                                                                                                                                                                                                                                                                                                                                                                                                                                                                                                                                                                                                                                                                                                                                                                                                                          |
|                                                                                                                                 | Todd A Castoe                                                                                                                                                                                                                                                                                                                                                                                                                                                                                                                                                                                                                                                                                                                                                                                                                                                                                                                                                                                                                                                                                                                                                                                                                                                                                                                                                                                                                                                                                                                                                                                                                                                                                                                                                                                                                                                                                                                                                                                                                                                                                                                                                                                                                                                                                                                                                                                                                                                                                                                                                                                                                                                                                                                                                                                                                                           |
|                                                                                                                                 | Tereza Jezkova                                                                                                                                                                                                                                                                                                                                                                                                                                                                                                                                                                                                                                                                                                                                                                                                                                                                                                                                                                                                                                                                                                                                                                                                                                                                                                                                                                                                                                                                                                                                                                                                                                                                                                                                                                                                                                                                                                                                                                                                                                                                                                                                                                                                                                                                                                                                                                                                                                                                                                                                                                                                                                                                                                                                                                                                                                          |
| <b>Order of Authors Secondary Information:</b>                                                                                  |                                                                                                                                                                                                                                                                                                                                                                                                                                                                                                                                                                                                                                                                                                                                                                                                                                                                                                                                                                                                                                                                                                                                                                                                                                                                                                                                                                                                                                                                                                                                                                                                                                                                                                                                                                                                                                                                                                                                                                                                                                                                                                                                                                                                                                                                                                                                                                                                                                                                                                                                                                                                                                                                                                                                                                                                                                                         |
| <b>Response to Reviewers:</b>                                                                                                   | <p>Point-By-Point Response to Reviews</p> <p>Reviewer reports:</p> <p>Reviewer #1: I want to thank authors for carefully considering all the comments raised by reviewers. This manuscript will substantially add to the genomic resources for further studies. Most importantly, micro chromosome work will indeed pave way to new research in understanding their nuanced biology and evolution. Great work and congratulations.</p> <p>*** We are pleased that the reviewer was satisfied with our revisions and supportive of the foundational nature of the work on microchromosomes, and we thank them for their time and feedback.</p> <p>Reviewer #2: The authors have done a good job with the revision. I only have a few points that I would like to emphasize and suggest they address further.</p> <p>*** We are happy to hear that the reviewer thought that our previous revision was well done, and thank them for their additional feedback here.</p> <p>1. In comparison to BUSCO results from other recent squamate genomes (see Figure 2d in <a href="https://www.biorxiv.org/content/10.1101/2021.09.28.462146v1.full">https://www.biorxiv.org/content/10.1101/2021.09.28.462146v1.full</a> for a comparison) the BUSCO results from this genome assembly suggest it is not considerably high quality assembly (relatively). The 16% missing and only 64% complete BUSCOs suggest this assembly is relatively incomplete and is a lower quality assembly (more fragmented) than many of the other squamate genomes. This should be explained and discussed in the text, particularly in how this may affect their conclusions about defining the microchromosomes, their synteny analysis, and their pathway analysis.</p> <p>*** In the discussion we now mention the possible effect of the incomplete assembly on our results (lines 234-239, and 284-286)</p> <p>2. It should be further emphasized throughout that the microchromosome naming designations are putative (and very possibly may not correspond to the karyotype) due to (1) the incomplete nature of the assembly, (2) the splitting of scaffolds into microchromosomes based on bioinformatic predictions, (3) and their naming based on length when some of their lengths are very similar (many less than 200,000 bp difference, Table S1).</p> <p>*** We added this as suggested to the discussion (lines 234-239).</p> <p>3. Line 181, I think you are missing a number for the upper limit. To define the 14 scaffolds that are &gt; 6mb and &lt; #?</p> <p>*** The upper limit for these 14 scaffolds now been added (75 Mb, line 181).</p> <p>4. Line 193, I think 'm' is supposed to be a number here.</p> <p>*** The index is explained a couple lines above (line 190). In this case, "m" is a variable based on the species chromosome number.</p> |
| <b>Additional Information:</b>                                                                                                  |                                                                                                                                                                                                                                                                                                                                                                                                                                                                                                                                                                                                                                                                                                                                                                                                                                                                                                                                                                                                                                                                                                                                                                                                                                                                                                                                                                                                                                                                                                                                                                                                                                                                                                                                                                                                                                                                                                                                                                                                                                                                                                                                                                                                                                                                                                                                                                                                                                                                                                                                                                                                                                                                                                                                                                                                                                                         |
| <b>Question</b>                                                                                                                 | <b>Response</b>                                                                                                                                                                                                                                                                                                                                                                                                                                                                                                                                                                                                                                                                                                                                                                                                                                                                                                                                                                                                                                                                                                                                                                                                                                                                                                                                                                                                                                                                                                                                                                                                                                                                                                                                                                                                                                                                                                                                                                                                                                                                                                                                                                                                                                                                                                                                                                                                                                                                                                                                                                                                                                                                                                                                                                                                                                         |
| Are you submitting this manuscript to a special series or article collection?                                                   | No                                                                                                                                                                                                                                                                                                                                                                                                                                                                                                                                                                                                                                                                                                                                                                                                                                                                                                                                                                                                                                                                                                                                                                                                                                                                                                                                                                                                                                                                                                                                                                                                                                                                                                                                                                                                                                                                                                                                                                                                                                                                                                                                                                                                                                                                                                                                                                                                                                                                                                                                                                                                                                                                                                                                                                                                                                                      |
| <b>Experimental design and statistics</b>                                                                                       | Yes                                                                                                                                                                                                                                                                                                                                                                                                                                                                                                                                                                                                                                                                                                                                                                                                                                                                                                                                                                                                                                                                                                                                                                                                                                                                                                                                                                                                                                                                                                                                                                                                                                                                                                                                                                                                                                                                                                                                                                                                                                                                                                                                                                                                                                                                                                                                                                                                                                                                                                                                                                                                                                                                                                                                                                                                                                                     |
| Full details of the experimental design and statistical methods used should be given in the Methods section, as detailed in our |                                                                                                                                                                                                                                                                                                                                                                                                                                                                                                                                                                                                                                                                                                                                                                                                                                                                                                                                                                                                                                                                                                                                                                                                                                                                                                                                                                                                                                                                                                                                                                                                                                                                                                                                                                                                                                                                                                                                                                                                                                                                                                                                                                                                                                                                                                                                                                                                                                                                                                                                                                                                                                                                                                                                                                                                                                                         |

|                                                                                                                                                                                                                                                                                                                                                                                                                                                                                                                                                         |            |
|---------------------------------------------------------------------------------------------------------------------------------------------------------------------------------------------------------------------------------------------------------------------------------------------------------------------------------------------------------------------------------------------------------------------------------------------------------------------------------------------------------------------------------------------------------|------------|
| <p><a href="#">Minimum Standards Reporting Checklist.</a></p> <p>Information essential to interpreting the data presented should be made available in the figure legends.</p> <p>Have you included all the information requested in your manuscript?</p>                                                                                                                                                                                                                                                                                                |            |
| <p><b>Resources</b></p> <p>A description of all resources used, including antibodies, cell lines, animals and software tools, with enough information to allow them to be uniquely identified, should be included in the Methods section. Authors are strongly encouraged to cite <a href="#">Research Resource Identifiers</a> (RRIDs) for antibodies, model organisms and tools, where possible.</p> <p>Have you included the information requested as detailed in our <a href="#">Minimum Standards Reporting Checklist</a>?</p>                     | <p>Yes</p> |
| <p><b>Availability of data and materials</b></p> <p>All datasets and code on which the conclusions of the paper rely must be either included in your submission or deposited in <a href="#">publicly available repositories</a> (where available and ethically appropriate), referencing such data using a unique identifier in the references and in the “Availability of Data and Materials” section of your manuscript.</p> <p>Have you have met the above requirement as detailed in our <a href="#">Minimum Standards Reporting Checklist</a>?</p> | <p>Yes</p> |

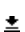

1 **A chromosome-level genome assembly and annotation of the desert horned**  
2 **lizard, *Phrynosoma platyrhinos*, provides insight into chromosomal**  
3 **rearrangements among reptiles**

4

5 Running title: genome of *P. platyrhinos*

6 Nazila Koochekian (\*Correspondence): Department of Biology, Miami University, Oxford, OH,  
7 45056, USA. Email: koochen@miamioh.edu

8 Alfredo Ascanio: Department of Biology, Miami University, Oxford, OH, 45056, USA. Email:  
9 ascaniaa@miamioh.edu

10 Keaka Farleigh: Department of Biology, Miami University, Oxford, OH, 45056, USA. Email:  
11 farleik@miamioh.edu

12 Daren C. Card: Department of Organismic & Evolutionary Biology, Harvard University,  
13 Cambridge, MA, 02138, USA, and Museum of Comparative Zoology, Harvard University,  
14 Cambridge, MA, 02138, USA. Email: dcard@fas.harvard.edu

15 Drew R. Schield: Department of Ecology and Evolutionary Biology, University of Colorado,  
16 Boulder, CO, 80309, USA. Email: Drew.Schild@colorado.edu

17 Todd A. Castoe: Department of Biology, University of Texas at Arlington, Arlington, TX, 76019,  
18 USA. Email: todd.castoe@uta.edu

19 Tereza Jezkova: Department of Biology, Miami University, Oxford, OH, 45056, USA. Email:  
20 jezkovt@miamioh.edu

21

22 **ORCID:**

23 Nazila Koochekian [0000-0003-4826-098X];

24 Alfredo Ascanio [0000-0001-9987-7977];

25 Keaka Farleigh [0000-0002-9195-121X];

26 Daren C Card [0000-0002-1629-5726];

27 Drew R Schield [0000-0001-7854-9480];

28 Todd A Castoe [0000-0002-5912-1574];

29 Tereza Jezkova [0000-0003-4114-4564];

30

## 31 Abstract

32 *Background.* The increasing number of chromosome-level genome assemblies has advanced  
33 our knowledge and understanding of macroevolutionary processes. Here, we introduce the  
34 genome of the desert horned lizard, *Phrynosoma platyrhinos*, an iguanid lizard occupying  
35 extreme desert conditions of the American southwest. We conduct analysis of the chromosomal  
36 structure and composition of this species and compare these features across genomes of 12  
37 other reptiles (5 species of lizards, 3 snakes, 3 turtles, and 1 bird).

38 *Findings.* The desert horned lizard genome was sequenced using Illumina paired-end reads and  
39 assembled and scaffolded using Dovetail Genomics Hi-C and Chicago long-range contact data.  
40 The resulting genome assembly has a total length of 1,901.85 Mb, scaffold N50 length of  
41 273.213 Mb, and includes 5,294 scaffolds. The chromosome-level assembly is composed of 6  
42 macrochromosomes and 11 microchromosomes. A total of 20,764 genes were annotated in the  
43 assembly. GC content and gene density are higher for microchromosomes than  
44 macrochromosomes, while repeat element distributions show the opposite trend. Pathway  
45 analyses provide preliminary evidence that microchromosome and macrochromosome gene  
46 content are functionally distinct. Synteny analysis indicates that large microchromosome blocks

47 are conserved among closely related species, whereas macrochromosomes show evidence of  
48 frequent fusion and fission events among reptiles, even between closely related species.

49 *Conclusions:* Our results demonstrate dynamic karyotypic evolution across Reptilia, with  
50 frequent inferred splits, fusions, and rearrangements that have resulted in shuffling of  
51 chromosomal blocks between macrochromosomes and microchromosomes. Our analyses also  
52 provide new evidence for distinct gene content and chromosomal structure between  
53 microchromosomes and macrochromosomes within reptiles.

54

55 **Key words:** microchromosome; macrochromosome; gene content; synteny; Reptilia

## 56 Background

57 The increasing number of available chromosome-level genome assemblies of non-  
58 traditional model organisms has advanced our understanding of genome evolution over large  
59 time scales, including intra- and inter-chromosomal rearrangements and karyotype evolution  
60 across amniote vertebrates. A major gap in our understanding of amniote genome structure,  
61 composition, and evolution has been due to the lack of representative reptilian genomes of high  
62 enough quality to compare chromosome composition and structure. From data that is available,  
63 reptiles (the clade of Sauropsida) appear to exhibit particularly high levels of karyotypic variation  
64 (Fig. 1)[1, 2]. Much of this karyotypic variation is apparently due to frequent merging, splitting,  
65 and rearrangements among chromosomes, resulting in varying numbers and sizes of  
66 chromosomes even among closely related taxa (Fig. 1). Unlike mammalian genomes which lack  
67 microchromosomes, most reptilian genomes contain both macrochromosomes and  
68 microchromosomes [3]. The condition of possessing both macro- and microchromosomes  
69 appears to represent an ancient ancestral state that spans 400–450 million years of  
70 evolutionary history, as microchromosomes are present in many ancient chordates, fish, and  
71 amphibians, and all amniote vertebrates except mammals and crocodylians [3].

72 Microchromosomes are generally identified by their smaller size (50 Mb threshold in squamates  
73 [4]). In the chicken, for example, microchromosomes range from 3.5 to 23 Mb [5], compared to  
74 macrochromosomes which range from 40 to 250 Mb [6].

75         Although microchromosome organization in avian species is relatively conserved at a  
76 karyotypic level [7], microchromosomes of non-avian reptiles vary considerably in number and  
77 size [8,9], potentially due to relatively high recombination rates [10] that lead to higher rates of  
78 chromosomal rearrangement [3,11]. Despite being a promising system in which to study  
79 karyotypic evolution, relatively little is known about the genomic features of macrochromosomes  
80 and microchromosomes and how these features evolve across Reptilia [12]. Moreover,  
81 microchromosomes appear structurally and functionally distinct from macrochromosomes [13],  
82 and a deeper characterization of these distinctions may improve our understanding of the  
83 functional and evolutionary significance of the presence/absence of microchromosomes, and  
84 the presence of genes on micro- versus macrochromosomes. Despite interest in the processes  
85 and patterns related to chromosome evolution in reptiles, progress has been limited by the  
86 availability of relatively few high-quality reptile genomes available for comparative study. In  
87 lizards, only five genomes are annotated and assembled at the level of chromosomes (i.e.,  
88 chromosome-size scaffolds that in many cases have been ascribed to specific chromosomes):  
89 the green anole, *Anolis carolinensis* with 6 chromosomes and 7 microchromosomal linkage  
90 groups [14], the viviparous lizard, *Zootoca vivipara* with 19 chromosomal linkage groups [15],  
91 the sand lizard, *Lacerta agilis* with 18 autosomes and Z and W sex chromosomes [16], the  
92 common wall lizard, *Podarcis muralis* with 18 autosomes and a Z sex chromosome [17], and the  
93 Argentine black and white tegu, *Salvator merianae*, with chromosome-scale scaffolds that have  
94 not been fully ascribed to specific chromosomes [18].

95         Here we present a new chromosome-level genome assembly of the desert horned lizard  
96 (*P. platyrhinos*; NCBI:txid52577) and use this genome to conduct comparative analysis of  
97 chromosome content and evolution across reptiles. This species is widely distributed across the

98 southwestern deserts of north America, including some of the hottest and driest places on Earth  
99 (e.g. Death valley in the Mojave Desert; [19]) which makes it an attractive model organism to  
100 study adaptation to extreme thermal environments. We have annotated the genome assembly  
101 and assessed large-scale structure and composition of the genome across macrochromosomes  
102 and microchromosomes. Using this new resource, we conduct synteny analyses to explore  
103 major changes in genome organization by making comparisons with existing chromosome-level  
104 annotated genomes of other lizards (*A. carolinensis*, *S. merianae*, *L. agilis*, *Z. vivipara* and *P.*  
105 *muralis*), snakes (*Crotalus viridis* [20], *Thamnophis elegans* [21], and *Naja naja* [22]), a bird  
106 (*Gallus gallus* [23]), and turtles (*Trachemys scripta* [24], *Gopherus evgoodei* [25], and  
107 *Dermochelys coriacea* [9]). Our findings reveal differences in structure and gene content of  
108 macrochromosomes and microchromosomes in *P. platyrhinos* and highlight numerous  
109 chromosomal rearrangements among reptiles.

## 110 Analysis

### 111 **Genome assembly, transcriptome assembly, and chromosome identification**

112 The genome of *P. platyrhinos* was sequenced at 21,053.74-fold physical coverage using  
113 the Dovetail Genomics HiRise™ [26] sequencing and assembly approach that combines a  
114 contig-level assembly produced from shotgun Illumina sequencing with long-range scaffolding  
115 data from Chicago and Hi-C library preparations (Table 1). The final assembly included 5,294  
116 total scaffolds, with 7 large scaffolds and 10 smaller scaffolds comprising 99.56% of the genome  
117 assembly. The known karyotype of the species is composed of 6 macrochromosomes and 11  
118 microchromosomes [27,28] and we assumed this karyotype when linking chromosomes to their  
119 representative assembly scaffolds. Using chromosome-linked gene markers from *A.*  
120 *carolinensis* and *Leiolepis reevesii* [29], the 7 largest scaffolds were assigned to  
121 macrochromosomes 1-6 (two scaffolds corresponded to the two arms of macrochromosome 3;



122 Table S1 and Table S2). Ten smaller scaffolds were assigned to microchromosomes, and one  
123 of these scaffolds was manually split into two microchromosomes (Table S1). We followed  
124 previous studies [8] to infer the location of the putative split between chromosomes by  
125 combining evidence from physically-linked Chicago scaffolds that cannot span multiple  
126 chromosomes, repeat element and GC composition, and synteny with chromosomes of other  
127 species (see Methods).

128 The chromosome-linked gene markers used to identify chromosome scaffolds do not  
129 identify specific microchromosome numbers (Table S2), so we ordered the assembled *P.*  
130 *platyrhinos* microchromosomes by descending length and numbered them microchromosomes  
131 1-11 (Table S1). Sex chromosomes are conserved across iguanid lizards [30] and we identified  
132 microchromosome 9 as the X chromosome in *P. platyrhinos* based on homology with X-linked  
133 markers in *A. carolinensis* (*ATP2A2*, *FZD10*, and *TMEM132D* [30]; Table S2).

134 RNA-sequencing of 8 tissues (liver, lungs, brain, muscle, testes, heart, eyes, and  
135 kidneys) was used to assemble the transcriptome of *P. platyrhinos* using Trinity r2014 0413p1  
136 [31]. The final transcriptome assembly contained 199,541 transcripts comprising 199,500  
137 Trinity-annotated genes, with an average length of 1,438 base pairs and an N50 length of 2,420  
138 bp.

### 139 **Genome annotation and chromosomal composition**

140 We annotated 20,764 protein-coding genes in the *P. platyrhinos* genome assembly  
141 (JAIPUX010000000) using the gene prediction software MAKER v. 2.31.10 [32] and gene  
142 predictions based on AUGUSTUS v. 3.2.3. [33]. Among the total annotated genes, 16,384  
143 genes were identified using searches against protein sequences in databases NCBI and  
144 Interpro [34]. We identified 4,324 complete and fragmented BUSCO markers in the *P.*  
145 *platyrhinos* genome annotation from the total 5,310 BUSCO markers present in the library  
146 “tetrapoda\_odb10.2019-11-20” (Table 2). Our repeat annotation identified 44.45% of the

147 genome as repetitive elements (Table S3) using RepeatModeler v. 1.0.11 [35] and  
148 RepeatMasker v. 4.0.8 [36]. The major components of the genomic repeat content included  
149 simple sequence repeats (6.90%), as well as L2/CR1/Rex (6.88%), hobo-Activator (5.98%), and  
150 Tourist/Harbinger (4.90%) transposable element families (Table S3).

151 Chromosomal composition analyses indicate that overall gene density (GD) and GC-  
152 content tended to be lower on *P. platyrhinos* macrochromosomes (mean  $\pm$  sd GD =  $0.19 \pm 0.14$ ,  
153 median = 0.17 per Mb; mean  $\pm$  sd GC% =  $35.9 \pm 1.2\%$ , median = 35.9%) than  
154 microchromosomes (mean  $\pm$  sd GD =  $0.27 \pm 0.16$ , median = 0.29 per Mb; mean  $\pm$  sd GC% =  
155  $38.5 \pm 2.8\%$ , median = 38.2%; Fig. 2 and S1). Conversely, repeat elements density tended to  
156 be higher on macrochromosomes (mean  $\pm$  sd =  $44.6 \pm 5.6\%$ , median = 43.3% per Mb) than  
157 microchromosomes (mean =  $39.4 \pm 10\%$ , median = 38.1% per Mb; Fig. 2 and S1). These  
158 differences in GD, GC-content, and repeat elements between macro and microchromosomes  
159 were statistically significant (Wilcoxon-W = 137011, p-value =  $5.7 \times 10^{-16}$  for GD; Wilcoxon-W =  
160 68322, p-value <  $2.2 \times 10^{-16}$  for GC-content; and Wilcoxon-W = 283330, p-value <  $2.2 \times 10^{-16}$  for  
161 repeat elements).

## 162 ***Pathway analysis***

163 We assessed whether macrochromosomes and microchromosomes contain distinct  
164 functional classes of genes using pathway analyses. From the total of 16,384 protein coding  
165 genes that were identified by homology search, 9,590 gene IDs on macrochromosomes and  
166 3,129 on microchromosomes were identifiable by PANTHER16.0 [37,38] using the protein  
167 family/subfamily library (Fig. S2). These genes were classified into a total of 164 pathways from  
168 about 177 available pathways in PANTHER. The highest number of genes belonged to the  
169 “Wnt signaling pathway (P00057)” and “Gonadotropin-releasing hormone receptor pathway  
170 (P06664)”, which together accounted for more than 10% (more than 5% each) of the

171 macrochromosomal and microchromosomal genes. We compared the frequencies of genes in  
172 each PANTHER pathway between macrochromosomes and microchromosomes and found 37  
173 pathways where all genes were located on macrochromosomes (Table S4), with 13 pathways  
174 having all genes localized to a single macrochromosome. Among microchromosomes, we found  
175 that three pathways have genes exclusively found on only microchromosomes and in all three  
176 pathways, these genes were located on a single microchromosome (Table S4). These 40  
177 pathways (37 for macrochromosomes + 3 for microchromosomes) mostly belong to  
178 biosynthesis, signaling, metabolism, and degradation pathways (in descending order).

### 179 **Synteny analysis**

180 We investigated how reptilian genome composition has been impacted by chromosomal  
181 rearrangements through evolutionary time using comparative synteny analyses among reptiles.  
182 We conducted pairwise analyses of synteny between the *P. platyrhinos* genome and 12 species  
183 (five lizards, three snakes, three turtles, and a bird) for which chromosome-level genome  
184 assemblies were available (Fig. 3)[25]. The genome of *S. merianae* has not been assembled to  
185 chromosomes but the karyotype of this species is known (5 macrochromosome and 14  
186 microchromosomes; [39]) so in this study we used 19 largest scaffolds from the *S. merianae*  
187 assembly with 5 scaffolds > 200 Mb, and 75 Mb > 14 scaffolds > 6 Mb). We performed synteny  
188 analyses using a ‘chromosome painting’ technique (see Methods), which established homology  
189 between sets of 100 bp *in silico* ‘markers’ from the *P. platyrhinos* chromosome scaffolds and  
190 regions of the genomes of the other reptile species (Table S5). We quantitatively assessed the  
191 degree to which syntenic blocks from each *P. platyrhinos* chromosome scaffold are dispersed  
192 across chromosomes of the other species (Fig. 4) using a dominance analysis [40], more  
193 commonly used in ecological community assessments. Specifically, dispersion was measured  
194 using the Simpson’s Dominance Index reciprocal (SR), with which we consider an effective  
195 number of target chromosomes in other species onto which the homologies of a given *P.*

196 *platyrhinos* chromosome appear. This index ranges from 1 to  $m$ , where  $m$  is the number of  
197 chromosomes of the target species being compared to *P. platyrhinos*. A value of 1 represents  
198 high dominance, which in this context indicates that syntenic blocks from a chromosome of *P.*  
199 *platyrhinos* are restricted to a single chromosome of another species. A value of  $m$  would mean  
200 all chromosomes of the target species contain an even proportion of *P. platyrhinos* syntenic  
201 blocks. If a large syntenic block is retained in one chromosome while a few proportionally small  
202 syntenic blocks are distributed across other target chromosomes, the resulting dominance value  
203 will trend toward 1.

204 Our results show that macrochromosomes tend to have a higher degree of dispersion  
205 across different chromosomes of other species than microchromosomes (e.g.,  
206 macrochromosome 1 SR =  $2.38 \pm 0.96$ ; microchromosome 1 SR =  $1.45 \pm 0.45$ ), except for  
207 macrochromosome 6 (SR =  $1.44 \pm 0.27$ ; Fig. 5a). However, this chromosomal rearrangement  
208 does not follow the same pattern across species (Fig. 4). For example, *A. carolinensis* shows  
209 the highest values for SR in microchromosomes (Fig. 5b), but this may be an artifact of this  
210 species having an incomplete genome assembly for microchromosomes. In other lizards and  
211 snakes (with the exception of *C. viridis*), SR  $\sim 1$  for all microchromosomes (except  
212 microchromosome 6). In *G. gallus*, SR  $\sim 1$  for all microchromosomes except microchromosome  
213 1. In turtles, mean SR values for microchromosomes are  $> 1$ , but this is largely driven by higher  
214 SR values on microchromosomes 1, 4, and 6 (Fig. 4).

215 Macrochromosome synteny appears highly conserved between *P. platyrhinos* and *S.*  
216 *merianae*. Among the closest relatives of *P. platyrhinos*, *A. carolinensis* has the same  
217 macrochromosome arrangement as *P. platyrhinos* (Figs. 3-5). In the more distantly related  
218 snakes, *N. naja* and *C. viridis*, however, macrochromosomes 3 and 5 show high SR values and  
219 the remaining macrochromosomes have SR  $\sim 1$ . Compared to the other snakes, *T. elegans*  
220 (along with lizards in the family Lacertidae) generally possess a greater number of smaller  
221 macrochromosomes than *P. platyrhinos* and associated higher SR values. At greater

222 phylogenetic distances, the breakdown of chromosomal synteny from lizards to other reptilian  
223 lineages becomes more apparent (cumulative SR ~ 30 in turtles) and showing greater  
224 rearrangements and partitions of syntenic blocks in macrochromosomes than in  
225 microchromosomes (Fig. 4 and 5b).

226 Our results also show that rearrangements between macro- and microchromosomes are  
227 apparently common throughout the evolution of Reptilia, including macro and  
228 microchromosomes fusing together to form single macrochromosomes. For example,  
229 microchromosomes 5 and 6 in *P. platyrhinos* form a macrochromosome in *L. agilis*, *Z. vivipara*,  
230 and *P. muralis*, chromosome 6 of *P. platyrhinos* is syntenic with a macrochromosome and a  
231 microchromosome in *S. meriana*, and microchromosome 6 of *P. platyrhinos* comprises two  
232 microchromosomes in *S. meriana*, *G. gallus*, and turtle species (Fig. 3).

233

## 234 Discussion

235 The *P. platyrhinos* genome is only the second chromosome-level assembly available for the  
236 diverse lizard family Iguanidae (after *A. carolinensis*), and the only member of this family with  
237 well assembled microchromosomes, thereby contributing a new valuable resource for  
238 comparative genomics of reptiles. For *P. platyrhinos*, we identified scaffolds representing the 6  
239 macrochromosomes and 11 microchromosomes that comprise the known karyotype for the  
240 genus *Phrynosoma* [27,28,41]. We note that the chromosome number designations especially  
241 for microchromosomes, however, may differ from that of the known karyotype due to multiple  
242 factors, including the lack of chromosome linked markers for individual microchromosomes, our  
243 post-hoc bioinformatic-driven inferences of microchromosome boundaries, and the  
244 completeness of our genome assembly potentially impacting the accuracy of estimates of the  
245 true relative sizes (and size differences) of all microchromosomes. Despite this, the higher  
246 contiguity and completeness of microchromosomal scaffolds in the *P. platyrhinos* genome

247 relative to that of *A. carolinensis* does enable some of the first comparisons of chromosome  
248 evolution in lizards that incorporates patterns distinct to macro- versus microchromosomes. Our  
249 analyses of this and other comparative reptilian genomes highlight distinct functional classes of  
250 genes, chromosomal structure, and rearrangement patterns in microchromosomes compared to  
251 macrochromosomes.

252 Consistent with previous studies of reptilian chromosome composition [8,10,42], we find  
253 that in *P. platyrhinos*, GC content, gene density, and repeat element density differ between  
254 macrochromosomes and microchromosomes, with gene density and GC content being higher  
255 on microchromosomes and repeat elements being more densely distributed on  
256 macrochromosomes. Patterns of high gene density on microchromosomes have been  
257 hypothesized to be an evolutionary solution to reduce overall DNA mass and increase  
258 recombination rates between coding regions, predominantly by reducing repeat element content  
259 [3]. High recombination rates further increase GC content due to GC-biased gene conversion  
260 [43], leading to a higher frequency of GC bases on microchromosomes that can house  
261 functionally different gene content compared to macrochromosomes [13], a pattern we also  
262 observed in the *P. platyrhinos* genome (Fig. 2 and S1).

263 Our synteny analyses across reptile genomes revealed that splitting, fusion, and  
264 rearrangement events among chromosomes have occurred frequently and repeatedly  
265 throughout reptile evolution. This pattern of chromosome blocks shifting between macro-, and  
266 microchromosome-linkage likely explains some unusual patterns of gene density, GC-content,  
267 and repeat elements, such as blocks of high gene density on a macrochromosome that may  
268 represent ancestral fragments derived from microchromosomes. For example, high GC content  
269 and gene density relative to other macrochromosomes on one end of macrochromosome 6 of *P.*  
270 *platyrhinos* (extending for ~40 Mbp; Fig. 2) supports the scenario that a microchromosomal  
271 region with higher gene and GC density was recently translocated to a macrochromosome in  
272 the ancestor of *P. platyrhinos*. This process may have also contributed to the observed variation

273 in the numbers and sizes of macro- and microchromosomes, even among closely related  
274 species (e.g., *P. platyrhinos* versus *A. carolinensis*, and *C. viridis* versus *T. elegans*). Among  
275 macrochromosomes, fusion, splitting, and translocation to other chromosomes in more distantly  
276 related species such as turtles and chicken are common, whereas microchromosomes of *P.*  
277 *platyrhinos* typically remain in single homologous blocks in these other reptilian lineages, though  
278 there seem to be exceptions based on our analysis (Fig. 4 and Fig. 5b). Broadly, these findings  
279 suggest that ancestral chromosomal rearrangements may have resulted in regions of reptilian  
280 genomes that have not yet reached mutational and compositional equilibria, which are  
281 otherwise characteristic of macro- and microchromosomal regions, following ancestral  
282 chromosomal rearrangement events.

283 Adding to the growing body of evidence for the structural, compositional, and  
284 evolutionary distinctions between micro- and macrochromosomes [10,13,44,45,46,47,48], our  
285 analyses suggest that the gene content of these two classes of chromosomes may be distinct in  
286 function. Our preliminary observation of enrichment of genes from certain pathways on  
287 individual chromosomes or on macro- and microchromosomes more generally warrants further  
288 investigation. These biases could be driven by ancestral contingencies of gene content or active  
289 translocations of genes across chromosome classes, which may suggest a functionally driven  
290 basis for such biases. Our results, however, need to be interpreted with caution because these  
291 pathways are incomplete. Many genes are still functionally unknown, and our genome assembly  
292 is partially fragmented and missing some expected genes in Tetrapoda (Table 2). Nevertheless,  
293 our inferences, together with other emerging evidence for the compositional and functional  
294 distinctiveness between micro- and macrochromosomes [10,13,44] suggest that there may be  
295 key functional, evolutionary, and mechanistic features that distinguish these chromosome  
296 classes that explain the significance of the presence and abundance of microchromosomes  
297 across eukaryote lineages.

298

## 299 Methods

### 300 ***Genome and transcriptome assembly***

301 We sequenced and assembled the reference genome from a female desert horned lizard  
302 collected in Dry Lake Valley, Nevada (NCBI accession SAMN17187150). This specimen was  
303 collected and euthanized according to Miami University Institutional Animal Care and Use  
304 Committee protocol 992\_2021\_Apr. Liver tissue was snap frozen in liquid nitrogen and sent to  
305 Dovetail Genomics (Scotts Valley, CL) for extraction of DNA and construction of shotgun,  
306 Chicago, and Dovetail Hi-C paired end libraries. DNA was extracted using buffer G2, and Qiagen  
307 protease. Three initial shotgun sequencing libraries were constructed by fragmenting DNA  
308 extracts to 475 bp and using a TruSeq PCR-free library prep kit to ligate sequencing adapters  
309 and amplify each library. The resulting libraries were sequenced on an Illumina HiSeqX (Illumina  
310 HiSeq X Ten, RRID:SCR\_016385) and resulted in 859.9 million read pairs from paired end  
311 libraries (totaling 246 Gbp; see Table 3 for the number of sequenced reads for each library).  
312 Reads were trimmed for quality, sequencing adapters, and mate pair adapters using Trimmomatic  
313 (Trimmomatic, RRID:SCR\_011848) [49], Using these data, contigs and small scaffolds were  
314 assembled using Meraculous 2.2.4 (diploid\_mode 1; RRID:SCR\_010700) [50] with a kmer size of  
315 49-mers. which produced an assembly with a scaffold N50 of 0.013 Mb.

316 The original assembly was first scaffolded using a Chicago library according to the manufacturer's  
317 protocol. Three Chicago libraries were prepared as described previously [26]. Briefly, for each  
318 library, ~500ng of HMW gDNA was reconstituted into chromatin *in vitro* and fixed with  
319 formaldehyde. Fixed chromatin was digested with DpnII, the 5' overhangs filled in with biotinylated  
320 nucleotides, and then free blunt ends were ligated. After ligation, crosslinks were reversed, and  
321 the DNA purified from protein. Purified DNA was treated to remove biotin that was not internal to  
322 ligated fragments. The DNA was then sheared to ~350 bp mean fragment size and sequencing



323 libraries were generated using NEBNext Ultra enzymes and Illumina-compatible adapters. Biotin-  
324 containing fragments were isolated using streptavidin beads before PCR enrichment of each  
325 library. The libraries were sequenced on an Illumina HiSeqX. The number and length of read pairs  
326 produced for all libraries was 528 million 2x150 bp paired end reads (see Table 3 for the number  
327 of sequenced reads for each library). The resulting scaffolded assembly was far more contiguous  
328 with a scaffold N50 of 63.431 Mb. Lastly, a final round of scaffolding was performed using data  
329 from the Dovetail Hi-C library according to the manufacturer's protocols. Three Dovetail Hi-  
330 C libraries were prepared in a similar manner as described previously [51]. Briefly, for each library,  
331 chromatin was fixed in place with formaldehyde in the nucleus and then extracted. The following  
332 steps were the same as creating Chicago libraries. The number and length of read pairs produced  
333 for all libraries was 515 million 2x150 bp paired end reads (see Table 3 for the number of  
334 sequenced reads for each library). The input *de novo* assembly, Chicago library reads,  
335 and Dovetail Hi-C library reads were used as input data for HiRise [52], a software pipeline  
336 designed specifically for using proximity ligation data to scaffold genome assemblies. First,  
337 Chicago library sequences were aligned to the draft input assembly using SNAP v1.0.0 [53]. The  
338 separations of Chicago read pairs mapped within draft scaffolds were analyzed by HiRise to  
339 produce a likelihood model for genomic distance between read pairs, and the model was used to  
340 identify and break putative misjoins, to score prospective joins, and make joins above a  
341 threshold. After aligning and scaffolding Chicago data, Dovetail Hi-C library sequences were  
342 aligned and scaffolded following the same method. The final assembly (NCBI accession  
343 PRJNA685451) has a length of 1,901.85 Mb with a contig N50 of 12.04 kb and a scaffold N50 of  
344 273.213 Mb (see Table 1 for more statistics for this genome assembly).

345 Transcriptomic libraries were sequenced from 8 tissues (liver, lungs, brain, muscle, testes,  
346 heart, eyes, and kidneys) from a male lizard collected and euthanized according to Miami  
347 University Institutional Animal Care and Use Committee protocol 992\_2021\_Apr at the same  
348 locality as the genome animal. For each library, total RNA was extracted using Trizol reagent,

349 and unstranded mRNAseq libraries were individually prepared using an NEBNext Ultra RNA  
350 Library Prep kit with library insert sizes of 250-300 bp and sequenced on an Illumina HiSeq4000  
351 platform (Illumina HiSeq 4000 System, RRID:SCR\_016386) using a paired-end 150 bp run by  
352 Novogene Corporation Inc (Table 4). We used Trinity r2014 0413p1 to assemble transcriptome  
353 reads from all tissues (using min\_kmer\_cov:1 and default settings).

### 354 **Chromosome identification**

355 According to the karyotype for phrynosomatid [41] and *P. platyrhinos* [27,54] ( $2n=34$ ), we  
356 expected 6 pairs of macrochromosomes and 11 pairs of microchromosomes (one pair of  
357 microchromosomes is expected to be sex linked) for *P. platyrhinos*, and assumed this karyotype  
358 was correct for organizing our scaffolded genome assembly. Assigning scaffolds to specific  
359 chromosomes was done using blast+2.8.0 [55] using program “blastx” (options  
360 “num\_threads”=4, “-max\_target\_seqs”=10, “-evalue”= 1e-5, and “-outfmt”=11). We used  
361 chromosome-linked gene markers in other close species (*A. carolinensis*, *Leiolepis reevesii*)  
362 [29] and X-linked markers in *A. carolinensis* [39] downloaded from NCBI (Table S1) to identify  
363 the genomic location of each gene marker. Available markers for macrochromosomes in lizards  
364 were matched to seven of the largest scaffolds (two scaffolds for chromosome 3), which we  
365 sorted by size and named macrochromosomes 1-6. From the remaining scaffolds, 10 scaffolds  
366 (> 8 Mbp) were selected as potential microchromosomes. This suggested that one scaffold  
367 comprises two microchromosomes fused together as the expected number of  
368 microchromosomes was 11. Synteny analysis suggested that scaffold “Scf4326\_4427” (Fig. 6)  
369 has at least three origins in other closely related species. For example, in *S. merianae*, three  
370 microchromosome account for this scaffold, while the rest of scaffolds were linked to a specific  
371 microchromosome. Given that Chicago libraries reconstitute chromatin *in vitro*, interactions  
372 between distinct chromosomes are significantly reduced compared to *in vivo* Hi-C libraries [56].  
373 Also, microchromosomes may have a greater frequency of inter-chromosomal contact [12] than

374 expected in models used to scaffold based on Hi-C sequencing data. Therefore, we scanned for  
375 breakpoints between Chicago scaffolds in microchromosome scaffolds and for each of these  
376 breakpoints, we used multiple forms of evidence to assess whether a scaffold should be  
377 manually split. Following Schield [8], patterns of GC content, repeat density, and gene density at  
378 each breakpoint were assessed and we looked for instances in which there were abrupt shifts in  
379 these measures near breakpoints between Chicago scaffolds. At two of these breakpoints on  
380 the putatively artificially-merged (with a window of about 100 bp Ns/gaps) scaffold  
381 “Scf4326\_4427”, we observed elevated GC content, and reduced repeat elements density (Fig.  
382 S3). Based on these patterns, we chose to split this scaffold at the breakpoint location with  
383 reduced gene density to produce a final, curated assembly with the expected number of  
384 microchromosomes and finally numbered them based on their size.

### 385 ***Genome annotation***

386 Repeat elements were first identified using RepeatModeler v. 1.0.11 (RepeatModeler,  
387 RRID:SCR\_015027) [35] for *de novo* prediction of repeat families. To annotate genome-wide  
388 complex repeats, we used RepeatMasker v. 4.0.8 (RepeatMasker, RRID:SCR\_012954) [36]  
389 with default settings to identify known Tetrapoda repeats present in the curated Repbase  
390 database release 20181026 [57]. We then ran 2 iterative rounds of RepeatMasker to annotate  
391 the known and the unknown elements identified by RepeatModeler, respectively, where the  
392 genome sequence provided for each analysis was masked based on all previous rounds of  
393 RepeatMasker.

394 We used MAKER v. 2.31.10 [32] as a consensus-based approach to annotate protein-coding  
395 genes in an iterative fashion. For annotation, a genome with complex, interspersed repeats hard  
396 masked as Ns was supplied and we set the ‘model\_org’ option to ‘simple’ in the MAKER control  
397 file (maker\_opts.ctl) to have MAKER soft mask simple repeats prior to gene annotation. The full  
398 *de novo* *P. platyrhinos* transcriptome assembly and protein datasets consisting of all annotated

399 proteins for *A. carolinensis* [14] from NCBI were used as the evidence for protein coding gene  
400 prediction. For the first round of annotation, “est2genome” and “protein2genome” were set to 1  
401 to predict genes based on the aligned transcripts and proteins. Using the gene models from the  
402 first round of MAKER, we were able to train gene prediction software AUGUSTUS v. 3.2.3.  
403 (Augustus, RRID:SCR\_008417) [33]. To do so, we used Benchmarking Universal Single-Copy  
404 Orthologs (BUSCOs) v. 2.0.1 (BUSCO, RRID:SCR\_015008), which has an internal pipeline to  
405 automate the training of Augustus based on a set of conserved, single-copy orthologs for  
406 Tetrapoda (Tetrapoda odb9 dataset) [58]. We ran BUSCO in the ‘genome’ mode and specified  
407 the ‘--long’ option to have BUSCO perform internal Augustus parameter optimization. Then we  
408 ran MAKER with *ab initio* gene prediction (‘est2genome=0’ and ‘protein2genome=0’ options set)  
409 using transcripts, proteins, and repeat elements resulted from the first MAKER round as the  
410 empirical evidence (in GFF format) to produce gene models using the AUGUSTUS within the  
411 MAKER. For all MAKER analyses, we used default settings, except for ‘trna’ (set to 1),  
412 ‘max\_dna\_len’ (set to 300,000) and ‘split\_hit’ (set to 20,000). We used the gene models from  
413 our second round of MAKER annotation to re-optimize AUGUSTUS as described above before  
414 running one final MAKER analysis (round 3) with the re-optimized AUGUSTUS settings (all  
415 other settings are identical to round 2). We compared Annotation Edit Distance (AED)  
416 distributions, gene numbers, and average gene lengths across each round of Maker annotation  
417 to assess quality and used our final MAKER round (round 3; N = 20,764 genes) as our final  
418 gene annotation.

419 We ascribed gene IDs based on homology using reciprocal best-blast (with e-value thresholds  
420 of 1e-5) and stringent one-way blast (with an e-value threshold of 1e-8) searches against  
421 protein sequences from NCBI for *A. carolinensis*, *Pogona vitticeps* [59], *P. muralis* [17], *Gekko*  
422 *Japanese* [60], *Python molurus* [61], *Pseudonaja textilis* [62], *Notechis scutatus* [62],  
423 *Protobothrops mucrosquamatus* [63], *Thamnophis sirtalis* [64], *Alligator mississippiensis* [65],  
424 *Alligator sinensis* [66,67], *Crocodylus porosus* [68], *Chrysemys picta* [69], *Terrapene carolina*

425 [70], *Chelonia mydas* [71], *Pelodiscus sinensis* [71], *G. gallus*, *Homo sapiens* [72], *Mus*  
426 *musculus* [73], and Swiss-Prot [74] using a custom reciprocal best blast (RBB) script (orthorbb  
427 2.2) [75]. We also searched our annotated transcriptome against Interpro database via  
428 Interproscan--5.36-75.0 [76].

### 429 **Pathway analysis**

430 To compare macrochromosomes and microchromosomes functionally, protein coding genes on  
431 each chromosome were analyzed using gene IDs resulted from homology search. An ID list of  
432 all annotated genes on each chromosome was used for pathway analysis in PANTHER16.0 (via  
433 browser and “Gene List Analysis” tools option) classification system. Four model organisms (*A.*  
434 *carolinensis*, *G. gallus*, *M. musculus*, and *H. sapiens*) were selected as the reference for gene  
435 IDs. PANTHER assigned each gene to at least one of the 164 pathways identified for *P.*  
436 *platyrhinos* genome annotation (with a range from 2 to 759 genes in each pathway; Fig. S4).  
437 The distributions of each pathway among different chromosomes were compared using pathway  
438 results for each chromosome to identify potential pathways that belong to a specific  
439 chromosome/group of chromosomes.

### 440 **Synteny and chromosomal composition**

441 We used a python script “slidingwindow\_gc\_content.py” [77] to estimate GC content genome  
442 wide in windows of 1 Mbp. We estimated gene and repeat elements densities for the final  
443 genome assembly using python script “window\_quantify.py” with a window size of 1 Mbp. As the  
444 distribution of these variables (GD, GC-content, repeated elements) was highly skewed/non-  
445 normal, we performed Wilcoxon rank sum tests to check for statistically significant differences  
446 between macro and microchromosomes.

447 We explored broad-scale structural evolution across reptilian genomes using synteny analyses.  
448 We obtained chromosome-level genome assemblies from NCBI database for five lizards (*A.*  
449 *carolinensis* (GCA\_000090745.2), *S. merianae* (GCA\_003586115.2), *L. agilis*  
450 (GCA\_009819535.1), *P. muralis* (GCA\_004329235.1), and *Z. vivipara* (GCA\_011800845.1)),  
451 three snakes (*C. viridis* (GCA\_003400415.2), *T. elegans* (GCA\_009769535.1), and *N. naja*  
452 (GCA\_009733165.1)), one bird (*G. gallus* (GCA\_000002315.5)), and three turtles (*T. scripta*  
453 (GCA\_013100865.1), *G. evgoodei* (GCA\_007399415.1), and *D. coriacea* (GCA\_009764565.3)).  
454 We used a previously established method for in silico painting [44,78] to partition the *P.*  
455 *platyrhinos* genome to 18.39 million 100-bp markers. As input for this approach, we used  
456 blast+2.9.0 to blast the markers against each genome (with “blastn” program and setting “-  
457 max\_hsp” and “-max\_target\_seqs” to 1, “outfmt”=6 qseqid sseqid sstart length pident,  
458 “num\_threads”=3, and the rest as default). Following Schield et al. (2019), homology signals for  
459 chromosome painting had two main conditions: 1) each marker should have an alignment length  
460 of 50 bp or greater, and 2) at least five consecutive markers must be present to infer homology  
461 (Table S5). This was determined for scaffolds from each species. For posterior analyses based  
462 on the synteny results, only the assembled chromosomes of each species (based on the  
463 reference assembly) were considered. *Salvator merianae* was the only species in our analysis  
464 without assembled chromosomes, so we analyzed the 19 longest scaffolds (since karyotype  
465 analysis showed 2n=38) containing the majority of confirmed markers [39].  
466 To assess the distribution of syntenic blocks of *P. platyrhinos* across scaffolds from the 12  
467 target species, we calculated Simpson’s Dominance Index (D) and its reciprocal, which, in this  
468 context, can be considered the effective number of target chromosomes (C) containing  
469 homologies from a given *P. platyrhinos* chromosome:

470 
$$D_{ij} = \sum_{k=1}^m p_{ijk}^2$$

471

$$C_{ij} = \frac{1}{D_{ij}}$$

472

Where  $i$  represents a *P. platyrhinos* chromosome,  $j$  represents a target species,  $m$  is the

473

number of scaffolds in the target species  $j$  containing homologies from the  $i^{th}$  *P. platyrhinos*

474

chromosome, and  $k$  represents a specific target scaffold. Values of  $D$  can range between 0 (low

475

dominance, i.e., high spread of homologies) and 1 (full dominance, i.e., homologies remained in

476

one target scaffold). Values of  $C$  can range between 1 (full dominance) and  $m$  (low dominance,

477

i.e., equal spread of the  $i^{th}$  homologies across  $m$  target scaffolds).

478

## Data Availability

479

The chromosome-level genome assembly, annotation files, and other supporting data sets are

480

available in the *GigaScience* database (GigaDB) [79]. Raw genomic and transcriptomic

481

sequencing reads, and genome assembly and annotation were deposited in the NCBI under

482

BioProject number PRJNA685451.

483

## List of abbreviations

484

AED: Annotation Edit Distance

485

BUSCO: Benchmarking Universal Single-Copy Orthologs

486

C: Effective number of target Chromosomes

487

D: Simpson's Dominance index

488

GD: Gene Density

489

SR: Simpson's Reciprocal

490

## Ethics Approval

491

All animal collected and euthanized according to Miami University Institutional Animal Care and

492

Use Committee protocol 992\_2021\_Apr.

493 **Competing interests**

494 The authors declare that they have no competing interests.

495 **Authors' contributions**

496 N.K. and T.J. designed the project and wrote the first draft of the manuscript. N.K., A.A., K.F.,  
497 D.C.C., and D.R.S. performed bioinformatics and data analyses. All authors contributed to  
498 writing and approved the final manuscript.

499 **Acknowledgments**

500 This work was supported by startup funds from Miami University to T. Jezkova. K. Farleigh was  
501 supported by the National Science Foundation Graduate Research Fellowship Program (Award  
502 # 2037786). We thank Aaron Ambos and Dr. Jef Jaeger for help with obtaining specimens. The  
503 analyses were performed on Miami University Redhawk cluster with incredible assistance from  
504 Dr. Jens Mueller.



## 505 References

- 506 1. Deakin, J. E., and Ezaz, T. (2019). Understanding the Evolution of Reptile Chromosomes  
507 through Applications of Combined Cytogenetics and Genomics Approaches. *Cytogenetic*  
508 *and Genome Research*, 157, 7–20. <https://doi.org/10.1159/000495974>
- 509 2. Gemmell, N. J., Rutherford, K., Prost, S., Tollis, M., Winter, D., Macey, J. R., Adelson, D. L.,  
510 Suh, A., Bertozzi, T., Grau, J. H., Organ, C., Gardner, P. P., Muffato, M., Patricio, M., Billis,  
511 K., Martin, F. J., Flicek, P., Petersen, B., Kang, L., ... Stone, C. (2020). The tuatara genome  
512 reveals ancient features of amniote evolution. *Nature*, 584, 403–409.  
513 <https://doi.org/10.1038/s41586-020-2561-9>
- 514 3. Burt, D. W. (2002). Origin and evolution of avian microchromosomes. *Cytogenetic and Genome*  
515 *Research*, 96, 97–112. <https://doi.org/10.1159/000063018>
- 516 4. Waters, P. D., Patel, H. R., Ruiz-herrera, A., Alvarez-Gonzalez, L., Lister, N. C., Simakov, O.,  
517 Ezaz, T., Kaur, P., Frere, C., Grützner, F., Georges, A., and Graves, J. A. M. (2021).  
518 *Microchromosomes are building blocks of bird , reptile and mammal chromosomes.*
- 519 5. Solinhac, R., Leroux, S., Galkina, S., Chazara, O., Fève, K., Vignoles, F., Morisson, M.,  
520 Derjusheva, S., Bed'hom, B., Vignal, A., Fillon, V., and Pitel, F. (2010). Integrative mapping  
521 analysis of chicken microchromosome 16 organization. *BMC Genomics*, 11, 616.  
522 <https://doi.org/10.1186/1471-2164-11-616>
- 523 6. Axelsson, E. (2005). Comparison of the chicken and turkey genomes reveals a higher rate of  
524 nucleotide divergence on microchromosomes than macrochromosomes. *Genome*  
525 *Research*, 15, 120–125. <https://doi.org/10.1101/gr.3021305>
- 526 7. O'Connor, R. E., Kiazim, L., Skinner, B., Fonseka, G., Joseph, S., Jennings, R., Larkin, D. M.,  
527 and Griffin, D. K. (2019). Patterns of microchromosome organization remain highly

- 528 conserved throughout avian evolution. *Chromosoma*, 128, 21–29.  
529 <https://doi.org/10.1007/s00412-018-0685-6>
- 530 8. Schield, D. R., Card, D. C., Hales, N. R., Perry, B. W., Pasquesi, G. M., Blackmon, H., Adams,  
531 R. H., Corbin, A. B., Smith, C. F., Ramesh, B., Demuth, J. P., Betrán, E., Tollis, M., Meik, J.  
532 M., Mackessy, S. P., and Castoe, T. A. (2019). The origins and evolution of chromosomes,  
533 dosage compensation, and mechanisms underlying venom regulation in snakes. *Genome*  
534 *Research*, 29, 590–601. <https://doi.org/10.1101/gr.240952.118>
- 535 9. Bentley, B., Komoroske, L., and Mazzoni, C. (2021). Leatherback turtle genome. *BioRxiv*.
- 536 10. Schield, D. R., Pasquesi, G. I. M., Perry, B. W., Adams, R. H., Nikolakis, Z. L., Westfall, A. K.,  
537 Orton, R. W., Meik, J. M., Mackessy, S. P., and Castoe, T. A. (2020). Snake Recombination  
538 Landscapes Are Concentrated in Functional Regions despite PRDM9. *Molecular Biology*  
539 *and Evolution*, 37, 1272–1294. <https://doi.org/10.1093/molbev/msaa003>
- 540 11. Damas, J., Kim, J., Farré, M., Griffin, D. K., and Larkin, D. M. (2018). Reconstruction of avian  
541 ancestral karyotypes reveals differences in the evolutionary history of macro- and  
542 microchromosomes. *Genome Biology*, 19, 155. <https://doi.org/10.1186/s13059-018-1544-8>
- 543 12. Axelsson, E., Webster, M. T., Smith, N. G. C., Burt, D. W., and Ellegren, H. (2005).  
544 Comparison of the chicken and turkey genomes reveals a higher rate of nucleotide  
545 divergence on microchromosomes than macrochromosomes. *Genome Research*, 15, 120–  
546 125. <https://doi.org/10.1101/gr.3021305>
- 547 13. Perry, B. W., Schield, D. R., Adams, R. H., and Castoe, T. A. (2020). Microchromosomes  
548 Exhibit Distinct Features of Vertebrate Chromosome Structure and Function with  
549 Underappreciated Ramifications for Genome Evolution. *Molecular Biology and Evolution*, 1–  
550 7. <https://doi.org/10.1093/molbev/msaa253>

- 551 14. Alföldi, J., Di Palma, F., Grabherr, M., Williams, C., Kong, L., Mauceli, E., Russell, P., Lowe,  
552 C. B., Glor, R. E., Jaffe, J. D., Ray, D. A., Boissinot, S., Shedlock, A. M., Botka, C., Castoe,  
553 T. A., Colbourne, J. K., Fujita, M. K., Moreno, R. G., ten Hallers, B. F., ... Lindblad-Toh, K.  
554 (2011). The genome of the green anole lizard and a comparative analysis with birds and  
555 mammals. *Nature*, 477, 587–591. <https://doi.org/10.1038/nature10390>
- 556 15. Yurchenko, A. A., Recknagel, H., and Elmer, K. R. (2020). Chromosome-level assembly of  
557 the common lizard (*Zootoca vivipara*) genome. *Genome Biology and Evolution*.  
558 <https://doi.org/10.1093/gbe/evaa161>
- 559 16. Gemmell, N., Haase, B., Formenti, G., Sims, Y., Wood, J., Howe, K., Mountcastle, J., Lillie,  
560 M., Olsson, M., Rhie, A., Fedrigo, O., and Jarvis, E. D. (2019). *Lacerta agilis* (Sand lizard)  
561 genome, rLacAgi1, primary haplotype. *Unpublished*.  
562 [https://www.ncbi.nlm.nih.gov/assembly/GCF\\_009819535.1](https://www.ncbi.nlm.nih.gov/assembly/GCF_009819535.1)
- 563 17. Andrade, P., Pinho, C., Pérez i de Lanuza, G., Afonso, S., Brejcha, J., Rubin, C.-J.,  
564 Wallerman, O., Pereira, P., Sabatino, S. J., Bellati, A., Pellitteri-Rosa, D., Bosakova, Z.,  
565 Bunikis, I., Carretero, M. A., Feiner, N., Marsik, P., Paupério, F., Salvi, D., Soler, L., ...  
566 Carneiro, M. (2019). Regulatory changes in pterin and carotenoid genes underlie balanced  
567 color polymorphisms in the wall lizard. *Proceedings of the National Academy of Sciences*,  
568 116, 5633–5642. <https://doi.org/10.1073/pnas.1820320116>
- 569 18. Roscito, J. G., Sameith, K., Pippel, M., Francoijs, K.-J., Winkler, S., Dahl, A., Papoutsoglou,  
570 G., Myers, G., and Hiller, M. (2018). The genome of the tegu lizard *Salvator merianae* :  
571 combining Illumina, PacBio, and optical mapping data to generate a highly contiguous  
572 assembly. *GigaScience*, 7, 1–13. <https://doi.org/10.1093/gigascience/giy141>
- 573 19. Jezkova, T., Jaeger, J. R., Oláh-Hemmings, V., Jones, K. B., Lara-Resendiz, R. A., Mulcahy,  
574 D. G., and Riddle, B. R. (2016). Range and niche shifts in response to past climate change

- 575 in the desert horned lizard *Phrynosoma platyrhinos*. *Ecography*, 39, 437–448.  
576 <https://doi.org/10.1111/ecog.01464>
- 577 20. Pasquesi, G. I. M., Adams, R. H., Card, D. C., Schield, D. R., Corbin, A. B., Perry, B. W.,  
578 Reyes-Velasco, J., Ruggiero, R. P., Vandewege, M. W., Shortt, J. A., and Castoe, T. A.  
579 (2018). Squamate reptiles challenge paradigms of genomic repeat element evolution set by  
580 birds and mammals. *Nature Communications*, 9, 2774. [https://doi.org/10.1038/s41467-018-](https://doi.org/10.1038/s41467-018-05279-1)  
581 05279-1
- 582 21. Bronikowski, A., Fedrigo, O., Fungtammasan, C., Rhie, A., Mountcastle, J., Haase, B., Howe,  
583 K., Chow, W., Collins, J., and Jarvis, E. D. (2019). *Thamnophis elegans* (Western terrestrial  
584 garter snake) genome, rThaEle1, primary haplotype. *Unpublished*.  
585 [https://www.ncbi.nlm.nih.gov/assembly/GCF\\_009769535.1](https://www.ncbi.nlm.nih.gov/assembly/GCF_009769535.1)
- 586 22. Suryamohan, K., Krishnankutty, S. P., Guillory, J., Jevit, M., Schröder, M. S., Wu, M.,  
587 Kuriakose, B., Mathew, O. K., Perumal, R. C., Koludarov, I., Goldstein, L. D., Senger, K.,  
588 Dixon, M. D., Velayutham, D., Vargas, D., Chaudhuri, S., Muraleedharan, M., Goel, R., Chen,  
589 Y.-J. J., ... Seshagiri, S. (2020). The Indian cobra reference genome and transcriptome  
590 enables comprehensive identification of venom toxins. *Nature Genetics*, 52, 106–117.  
591 <https://doi.org/10.1038/s41588-019-0559-8>
- 592 23. Hillier, L. W., Miller, W., Birney, E., Warren, W., Hardison, R. C., Ponting, C. P., Bork, P., Burt,  
593 D. W., Groenen, M. A. M., Delany, M. E., Dodgson, J. B., Chinwalla, A. T., Cliften, P. F.,  
594 Clifton, S. W., Delehaunty, K. D., Fronick, C., Fulton, R. S., Graves, T. A., Kremitzki, C., ...  
595 Wilson, R. K. (2004). Sequence and comparative analysis of the chicken genome provide  
596 unique perspectives on vertebrate evolution. *Nature*, 432, 695–716.  
597 <https://doi.org/10.1038/nature03154>
- 598 24. Brian Simison, W., Parham, J. F., Papenfuss, T. J., Lam, A. W., and Henderson, J. B. (2020).

- 599 An Annotated Chromosome-Level Reference Genome of the Red-Eared Slider Turtle  
600 (*Trachemys scripta elegans*). *Genome Biology and Evolution*, 12, 456–462.  
601 <https://doi.org/10.1093/gbe/evaa063>
- 602 25. Rhie, A., McCarthy, S. A., Fedrigo, O., Damas, J., Formenti, G., Koren, S., Uliano-Silva, M.,  
603 Chow, W., Fungtammasan, A., Kim, J., Lee, C., Ko, B. J., Chaisson, M., Gedman, G. L.,  
604 Cantin, L. J., Thibaud-Nissen, F., Haggerty, L., Bista, I., Smith, M., ... Jarvis, E. D. (2021).  
605 Towards complete and error-free genome assemblies of all vertebrate species. *Nature*, 592,  
606 737–746. <https://doi.org/10.1038/s41586-021-03451-0>
- 607 26. Putnam, N. H., O'Connell, B. L., Stites, J. C., Rice, B. J., Blanchette, M., Calef, R., Troll, C.  
608 J., Fields, A., Hartley, P. D., Sugnet, C. W., Haussler, D., Rokhsar, D. S., and Green, R. E.  
609 (2016). Chromosome-scale shotgun assembly using an in vitro method for long-range  
610 linkage. *Genome Research*, 26, 342–350. <https://doi.org/10.1101/gr.193474.115>
- 611 27. Pianka, E. R. (1991). *Phrynosoma platyrhinos* Girard Desert Horned Lizard. *Catalogue of*  
612 *American Amphibians and Reptiles*, 1981, 1–4.
- 613 28. Leaché, Adam D., and Linkem, C. W. (2015). Phylogenomics of Horned Lizards (Genus:  
614 *Phrynosoma*) Using Targeted Sequence Capture Data. *Copeia*, 103, 586–594.  
615 <https://doi.org/10.1643/CH-15-248>
- 616 29. Srikulnath, K., Nishida, C., Matsubara, K., Uno, Y., Thongpan, A., Suputtitada, S.,  
617 Apisitwanich, S., and Matsuda, Y. (2009). Karyotypic evolution in squamate reptiles:  
618 comparative gene mapping revealed highly conserved linkage homology between the  
619 butterfly lizard (*Leiolepis reevesii rubritaeniata*, Agamidae, Lacertilia) and the Japanese four-  
620 striped rat snake (*Elaphe quadrivirg.* *Chromosome Research*, 17, 975–986.  
621 <https://doi.org/10.1007/s10577-009-9101-7>
- 622 30. Rovatsos, M., Pokorná, M., Altmanová, M., and Kratochvíl, L. (2014). Cretaceous park of sex

- 623 determination: sex chromosomes are conserved across iguanas. *Biology Letters*, 10,  
624 20131093. <https://doi.org/10.1098/rsbl.2013.1093>
- 625 31. Grabherr, M. G. ., Brian J. Haas, Moran Yassour Joshua Z. Levin, Dawn A. Thompson, Ido  
626 Amit, Xian Adiconis, Lin Fan, Raktima Raychowdhury, Qiandong Zeng, Zehua Chen, Evan  
627 Mauceli, Nir Hacohen, Andreas Gnirke, Nicholas Rhind, Federica di Palma, Bruce W., N.,  
628 and Friedman, and A. R. (2013). Trinity: reconstructing a full-length transcriptome without a  
629 genome from RNA-Seq data. *Nature Biotechnology*, 29, 644–652.  
630 <https://doi.org/10.1038/nbt.1883>.Trinity
- 631 32. Cantarel, B. L., Korf, I., Robb, S. M. C., Parra, G., Ross, E., Moore, B., Holt, C., Sanchez  
632 Alvarado, A., and Yandell, M. (2007). MAKER: An easy-to-use annotation pipeline designed  
633 for emerging model organism genomes. *Genome Research*, 18, 188–196.  
634 <https://doi.org/10.1101/gr.6743907>
- 635 33. Stanke, M., and Morgenstern, B. (2005). AUGUSTUS: a web server for gene prediction in  
636 eukaryotes that allows user-defined constraints. *Nucleic Acids Research*, 33, W465–W467.  
637 <https://doi.org/10.1093/nar/gki458>
- 638 34. Blum, M., Chang, H.-Y., Chuguransky, S., Grego, T., Kandasaamy, S., Mitchell, A., Nuka, G.,  
639 Paysan-Lafosse, T., Qureshi, M., Raj, S., Richardson, L., Salazar, G. A., Williams, L., Bork,  
640 P., Bridge, A., Gough, J., Haft, D. H., Letunic, I., Marchler-Bauer, A., ... Finn, R. D. (2021).  
641 The InterPro protein families and domains database: 20 years on. *Nucleic Acids Research*,  
642 49, D344–D354. <https://doi.org/10.1093/nar/gkaa977>
- 643 35. Smit, AF, and Hubley, R. (2015). *RepeatModeler* (v. 1.0.11). <http://www.repeatmasker.org>
- 644 36. Smit, AFA, Hubley, R., and Green, P. (2015). *RepeatMasker* (v. 4.0.8).  
645 <http://www.repeatmasker.org>

- 646 37. Mi, H., Muruganujan, A., Casagrande, J. T., and Thomas, P. D. (2013). Large-scale gene  
647 function analysis with the PANTHER classification system. *Nature Protocols*, 8, 1551–1566.  
648 <https://doi.org/10.1038/nprot.2013.092>
- 649 38. Mi, H., Ebert, D., Muruganujan, A., Mills, C., Albou, L.-P., Mushayamaha, T., and Thomas, P.  
650 D. (2021). PANTHER version 16: a revised family classification, tree-based classification  
651 tool, enhancer regions and extensive API. *Nucleic Acids Research*, 49, D394–D403.  
652 <https://doi.org/10.1093/nar/gkaa1106>
- 653 39. da Silva, M. J., de Araújo Vieira, A. P., Galvão Cipriano, F. M., dos Santos Cândido, M. R.,  
654 de Oliveira, E. H. C., Gimenez Pinheiro, T., and da Silva, E. L. (2020). The Karyotype of  
655 *Salvator merianae* (Squamata, Teiidae): Analyses by Classical and Molecular Cytogenetic  
656 Techniques. *Cytogenetic and Genome Research*, 160, 94–99.  
657 <https://doi.org/10.1159/000506140>
- 658 40. Hill, M. O. (1973). Diversity and Evenness: A Unifying Notation and Its Consequences.  
659 *Ecology*, 54, 427–432. <https://www.jstor.org/stable/1934352>
- 660 41. Leaché, A.D., and Sites, Jr., J. W. (2009). Chromosome Evolution and Diversification in North  
661 American Spiny Lizards (Genus *Sceloporus*). *Cytogenetic and Genome Research*, 127,  
662 166–181. <https://doi.org/10.1159/000293285>
- 663 42. Backstrom, N., Forstmeier, W., Schielzeth, H., Mellenius, H., Nam, K., Bolund, E., Webster,  
664 M. T., Ost, T., Schneider, M., Kempnaers, B., and Ellegren, H. (2010). The recombination  
665 landscape of the zebra finch *Taeniopygia guttata* genome. *Genome Research*, 20, 485–495.  
666 <https://doi.org/10.1101/gr.101410.109>
- 667 43. Huttener, R., Thorrez, L., in't Veld, T., Granvik, M., Snoeck, L., Van Lommel, L., and Schuit,  
668 F. (2019). GC content of vertebrate exome landscapes reveal areas of accelerated protein  
669 evolution. *BMC Evolutionary Biology*, 19, 144. <https://doi.org/10.1186/s12862-019-1469-1>

- 670 44. Schield, D. R., Card, D. C., Hales, N. R., Perry, B. W., Pasquesi, G. M., Blackmon, H., Adams,  
671 R. H., Corbin, A. B., Smith, C. F., Ramesh, B., Demuth, J. P., Betrán, E., Tollis, M., Meik, J.  
672 M., Mackessy, S. P., and Castoe, T. A. (2019). The origins and evolution of chromosomes,  
673 dosage compensation, and mechanisms underlying venom regulation in snakes. *Genome*  
674 *Research*, 29, 590–601. <https://doi.org/10.1101/gr.240952.118>
- 675 45. Damas, J., Kim, J., Farré, M., Griffin, D. K., and Larkin, D. M. (2018). Reconstruction of avian  
676 ancestral karyotypes reveals differences in the evolutionary history of macro- and  
677 microchromosomes. *Genome Biology*, 19, 155. <https://doi.org/10.1186/s13059-018-1544-8>
- 678 46. Axelsson, E., Webster, M. T., Smith, N. G. C., Burt, D. W., and Ellegren, H. (2005).  
679 Comparison of the chicken and turkey genomes reveals a higher rate of nucleotide  
680 divergence on microchromosomes than macrochromosomes. *Genome Research*, 15, 120–  
681 125. <https://doi.org/10.1101/gr.3021305>
- 682 47. Smith, J., Bruley, C. K., Paton, I. R., Dunn, I., Jones, C. T., Windsor, D., Morrice, D. R., Law,  
683 A. S., Masabanda, J., Sazanov, A., Waddington, D., Fries, R., and Burt, D. W. (2000).  
684 Differences in gene density on chicken macrochromosomes and microchromosomes.  
685 *Animal Genetics*, 31, 96–103. <https://doi.org/10.1046/j.1365-2052.2000.00565.x>
- 686 48. Kuraku, S., Ishijima, J., Nishida-Umehara, C., Agata, K., Kuratani, S., and Matsuda, Y. (2006).  
687 cDNA-based gene mapping and GC3 profiling in the soft-shelled turtle suggest a  
688 chromosomal size-dependent GC bias shared by sauropsids. *Chromosome Research*, 14,  
689 187–202. <https://doi.org/10.1007/s10577-006-1035-8>
- 690 49. Bolger, A. M., Lohse, M., and Usadel, B. (2014). Trimmomatic: a flexible trimmer for Illumina  
691 sequence data. *Bioinformatics*, 30, 2114–2120.  
692 <https://doi.org/10.1093/bioinformatics/btu170>
- 693 50. Chapman, J. A., Ho, I., Sunkara, S., Luo, S., Schroth, G. P., and Rokhsar, D. S. (2011).



- 694 Meraculous: De Novo Genome Assembly with Short Paired-End Reads. *PLoS ONE*, 6,  
695 e23501. <https://doi.org/10.1371/journal.pone.0023501>
- 696 51. Lieberman-Aiden, E., van Berkum, N. L., Williams, L., Imakaev, M., Ragoczy, T., Telling, A.,  
697 Amit, I., Lajoie, B. R., Sabo, P. J., Dorschner, M. O., Sandstrom, R., Bernstein, B., Bender,  
698 M. A., Groudine, M., Gnirke, A., Stamatoyannopoulos, J., Mirny, L. A., Lander, E. S., and  
699 Dekker, J. (2009). Comprehensive Mapping of Long-Range Interactions Reveals Folding  
700 Principles of the Human Genome. *Science*, 326, 289–293.  
701 <https://doi.org/10.1126/science.1181369>
- 702 52. DovetailGenomics. (2015). *HiRise*.  
703 [https://github.com/DovetailGenomics/HiRise\\_July2015\\_GR](https://github.com/DovetailGenomics/HiRise_July2015_GR)
- 704 53. Zaharia, M., Bolosky, W. J., Curtis, K., Fox, A., Patterson, D., Shenker, S., Stoica, I., Karp, R.  
705 M., and Sittler, T. (2011). *Faster and More Accurate Sequence Alignment with SNAP*. 1–10.  
706 <http://arxiv.org/abs/1111.5572>
- 707 54. Leaché, Adam D., Banbury, B. L., Linkem, C. W., and de Oca, A. N.-M. (2016). Phylogenomics  
708 of a rapid radiation: is chromosomal evolution linked to increased diversification in north  
709 american spiny lizards (Genus *Sceloporus*)? *BMC Evolutionary Biology*, 16, 63.  
710 <https://doi.org/10.1186/s12862-016-0628-x>
- 711 55. Camacho, C., Coulouris, G., Avagyan, V., Ma, N., Papadopoulos, J., Bealer, K., and Madden,  
712 T. L. (2009). BLAST+: architecture and applications. *BMC Bioinformatics*, 10, 421.  
713 <https://doi.org/10.1186/1471-2105-10-421>
- 714 56. Rice, E. S., Kohno, S., John, J. St., Pham, S., Howard, J., Lareau, L. F., O'Connell, B. L.,  
715 Hickey, G., Armstrong, J., Deran, A., Fiddes, I., Platt, R. N., Gresham, C., McCarthy, F.,  
716 Kern, C., Haan, D., Phan, T., Schmidt, C., Sanford, J. R., ... Green, R. E. (2017). Improved  
717 genome assembly of American alligator genome reveals conserved architecture of estrogen

- 718 signaling. *Genome Research*, 27, 686–696. <https://doi.org/10.1101/gr.213595.116>
- 719 57. Bao, W., Kojima, K. K., and Kohany, O. (2015). Repbase Update, a database of repetitive  
720 elements in eukaryotic genomes. *Mobile DNA*, 6, 11. [https://doi.org/10.1186/s13100-015-](https://doi.org/10.1186/s13100-015-0041-9)  
721 0041-9
- 722 58. Simão, F. A., Waterhouse, R. M., Ioannidis, P., Kriventseva, E. V., and Zdobnov, E. M. (2015).  
723 BUSCO: assessing genome assembly and annotation completeness with single-copy  
724 orthologs. *Bioinformatics*, 31, 3210–3212. <https://doi.org/10.1093/bioinformatics/btv351>
- 725 59. Georges, A., Li, Q., Lian, J., O’Meally, D., Deakin, J., Wang, Z., Zhang, P., Fujita, M., Patel,  
726 H. R., Holleley, C. E., Zhou, Y., Zhang, X., Matsubara, K., Waters, P., Graves, J. A. M., Sarre,  
727 S. D., and Zhang, G. (2015). High-coverage sequencing and annotated assembly of the  
728 genome of the Australian dragon lizard *Pogona vitticeps*. *GigaScience*, 4, 45.  
729 <https://doi.org/10.1186/s13742-015-0085-2>
- 730 60. Liu, Y., Zhou, Q., Wang, Y., Luo, L., Yang, J., Yang, L., Liu, M., Li, Y., Qian, T., Zheng, Y., Li,  
731 M., Li, J., Gu, Y., Han, Z., Xu, M., Wang, Y., Zhu, C., Yu, B., Yang, Y., ... Gu, X. (2015).  
732 *Gekko japonicus* genome reveals evolution of adhesive toe pads and tail regeneration.  
733 *Nature Communications*, 6, 10033. <https://doi.org/10.1038/ncomms10033>
- 734 61. Castoe, T. A., de Koning, A. J., Hall, K. T., Yokoyama, K. D., Gu, W., Smith, E. N., Feschotte,  
735 C., Uetz, P., Ray, D. A., Dobry, J., Bogden, R., Mackessy, S. P., Bronikowski, A. M., Warren,  
736 W. C., Secor, S. M., and Pollock, D. D. (2011). Sequencing the genome of the Burmese  
737 python (*Python molurus bivittatus*) as a model for studying extreme adaptations in snakes.  
738 *Genome Biology*, 12, 406. <https://doi.org/10.1186/gb-2011-12-7-406>
- 739 62. Edwards J, R. (2018). Direct Submission. *Unpublished*.  
740 [https://www.ncbi.nlm.nih.gov/assembly/GCF\\_900518735.1](https://www.ncbi.nlm.nih.gov/assembly/GCF_900518735.1)

- 741 63. Aird, S. D., Arora, J., Barua, A., Qiu, L., Terada, K., and Mikheyev, A. S. (2017). Population  
742 Genomic Analysis of a Pitviper Reveals Microevolutionary Forces Underlying Venom  
743 Chemistry. *Genome Biology and Evolution*, 9, 2640–2649.  
744 <https://doi.org/10.1093/gbe/evx199>
- 745 64. Warren, W. C., and Wilson, R. K. (2015). Direct Submission. *Unpublished*.  
746 [https://www.ncbi.nlm.nih.gov/assembly/GCF\\_001077635.1/](https://www.ncbi.nlm.nih.gov/assembly/GCF_001077635.1/)
- 747 65. St John, J. A., Braun, E. L., Isberg, S. R., Miles, L. G., Chong, A. Y., Gongora, J., Dalzell, P.,  
748 Moran, C., Bed'Hom, B., Abzhanov, A., Burgess, S. C., Cooksey, A. M., Castoe, T. A.,  
749 Crawford, N. G., Densmore, L. D., Drew, J. C., Edwards, S. V., Faircloth, B. C., Fujita, M. K.,  
750 ... Ray, D. A. (2012). Sequencing three crocodylian genomes to illuminate the evolution of  
751 archosaurs and amniotes. *Genome Biology*, 13, 415. [https://doi.org/10.1186/gb-2012-13-1-](https://doi.org/10.1186/gb-2012-13-1-415)  
752 415
- 753 66. Wan, Q.-H., Pan, S.-K., Hu, L., Zhu, Y., Xu, P.-W., Xia, J.-Q., Chen, H., He, G.-Y., He, J., Ni,  
754 X.-W., Hou, H.-L., Liao, S.-G., Yang, H.-Q., Chen, Y., Gao, S.-K., Ge, Y.-F., Cao, C.-C., Li,  
755 P.-F., Fang, L.-M., ... Fang, S.-G. (2013). Genome analysis and signature discovery for  
756 diving and sensory properties of the endangered Chinese alligator. *Cell Research*, 23, 1091–  
757 1105. <https://doi.org/10.1038/cr.2013.104>
- 758 67. Wan, Q., Pan, S., Hu, L., Zhu, Y., Xu, P., Xia, J., Chen, H., He, G., He, J., Ni, X., Hou, H.,  
759 Liao, S., Yang, H., Chen, Y., Gao, S., Ge, Y., Cao, C., Li, P., Fang, L., ... Fang, S. (2014).  
760 *Genomic data of the Chinese alligator (Alligator sinensis)*. *GigaScience Database*.  
761 <http://dx.doi.org/10.5524/100077>
- 762 68. Ghosh, A., Johnson, M. G., Osmanski, A. B., Louha, S., Bayona-Vásquez, N. J., Glenn, T. C.,  
763 Gongora, J., Green, R. E., Isberg, S., Stevens, R. D., and Ray, D. A. (2020). A High-Quality  
764 Reference Genome Assembly of the Saltwater Crocodile, *Crocodylus porosus*, Reveals

- 765 Patterns of Selection in Crocodylidae. *Genome Biology and Evolution*, 12, 3635–3646.  
766 <https://doi.org/10.1093/gbe/evz269>
- 767 69. Badenhorst, D., Hillier, L. W., Literman, R., Montiel, E. E., Radhakrishnan, S., Shen, Y., Minx,  
768 P., Janes, D. E., Warren, W. C., Edwards, S. V., and Valenzuela, N. (2015). Physical  
769 Mapping and Refinement of the Painted Turtle Genome ( *Chrysemys picta* ) Inform Amniote  
770 Genome Evolution and Challenge Turtle-Bird Chromosomal Conservation. *Genome Biology  
771 and Evolution*, 7, 2038–2050. <https://doi.org/10.1093/gbe/evv119>
- 772 70. Deem, S. L., and Warren, W. C. (2018). Direct Submission. *Unpublished*.  
773 [https://www.ncbi.nlm.nih.gov/assembly/GCF\\_002925995.2](https://www.ncbi.nlm.nih.gov/assembly/GCF_002925995.2)
- 774 71. Wang, Z., Pascual-anaya, J., Zadissa, A., Li, W., and Niimura, Y. (2014). *Europe PMC  
775 Funders Group The draft genomes of soft – shell turtle and green sea turtle yield insights  
776 into the development and evolution of the turtle – specific body plan*. 45, 701–706.  
777 <https://doi.org/10.1038/ng.2615>.The
- 778 72. Venter, J. C., Adams, M. D., Myers, E. W., Li, P. W., Mural, R. J., Sutton, G. G., Smith, H. O.,  
779 Yandell, M., Evans, C. A., Holt, R. A., Gocayne, J. D., Amanatides, P., Ballew, R. M., Huson,  
780 D. H., Wortman, J. R., Zhang, Q., Kodira, C. D., Zheng, X. H., Chen, L., ... Zhu, X. (2001).  
781 The Sequence of the Human Genome. *Science*, 291, 1304–1351.  
782 <https://doi.org/10.1126/science.1058040>
- 783 73. Brent, M. R., Birren, B. W., Antonarakis, S. E., Alexandersson, M., Zody, M., Birney, E.,  
784 Baertsch, R., Cuff, J., Parra, G., Slater, G., Waterston, R. H., Lindblad-Toh, K., Rogers, J.,  
785 Abril, J. F., Agarwal, P., Agarwala, R., Ainscough, R., An, P., Attwood, J., ... Lander, E. S.  
786 (2002). Initial sequencing and comparative analysis of the mouse genome. *Nature*, 420,  
787 520–562. <https://doi.org/10.1038/nature01262>
- 788 74. Bateman, A. (2019). UniProt: a worldwide hub of protein knowledge. *Nucleic Acids Research*,

- 789 47, D506–D515. <https://doi.org/10.1093/nar/gky1049>
- 790 75. Card, D. C. (2020). *Orthorbb* (v. 2.2).  
791 <https://github.com/darencard/GenomeAnnotation/blob/master/orthorbb>
- 792 76. Jones, P., Binns, D., Chang, H.-Y., Fraser, M., Li, W., McAnulla, C., McWilliam, H., Maslen,  
793 J., Mitchell, A., Nuka, G., Pesseat, S., Quinn, A. F., Sangrador-Vegas, A., Scheremetjew,  
794 M., Yong, S.-Y., Lopez, R., and Hunter, S. (2014). InterProScan 5: genome-scale protein  
795 function classification. *Bioinformatics*, 30, 1236–1240.  
796 <https://doi.org/10.1093/bioinformatics/btu031>
- 797 77. Schield, D. R. (2017). *Slidingwindow\_gc\_content.py*.  
798 <https://github.com/drewschield/Comparative-Genomics-Tools>
- 799 78. McKenna, D. D., Scully, E. D., Pauchet, Y., Hoover, K., Kirsch, R., Geib, S. M., Mitchell, R.  
800 F., Waterhouse, R. M., Ahn, S.-J., Arsala, D., Benoit, J. B., Blackmon, H., Bledsoe, T.,  
801 Bowsher, J. H., Busch, A., Calla, B., Chao, H., Childers, A. K., Childers, C., ... Richards, S.  
802 (2016). Genome of the Asian longhorned beetle (*Anoplophora glabripennis*), a globally  
803 significant invasive species, reveals key functional and evolutionary innovations at the  
804 beetle–plant interface. *Genome Biology*, 17, 227. [https://doi.org/10.1186/s13059-016-1088-](https://doi.org/10.1186/s13059-016-1088-8)  
805 8
- 806 79. Koochekian, N., Ascanio, A., Farleigh, K., Card, D. C., Schield, D. R., Castoe, T. A., and  
807 Jezkova, T. (2021). Supporting data for “A chromosome-level genome assembly and  
808 annotation of the desert horned lizard, *Phrynosoma platyrhinos*, provides insight into  
809 chromosomal rearrangements among reptiles.” *GigaScience Database*.  
810 <http://dx.doi.org/10.5524/100948>
- 811 80. Hedges, S. B., Dudley, J., and Kumar, S. (2006). TimeTree: a public knowledge-base of  
812 divergence times among organisms. *Bioinformatics*, 22, 2971–2972.

813 <https://doi.org/10.1093/bioinformatics/btl505>

814

## 815 FIGURES

816

817 Figure 1. For each major clade, we list diploid chromosome numbers, macrochromosome numbers, and  
818 microchromosome numbers based on previous research [1]. The phylogeny was adapted from [2].

819 Figure 2. The genome content of *P. platyrhinos*. The outer circle shows gene density on each chromosome, the  
820 middle circle shows repeat element density, and the inner one shows GC content. Each estimate is calculated per 1  
821 million base pair window in each chromosome. “Ma” indicates macrochromosomes and “mi” stands for  
822 microchromosomes. Two scaffolds for macrochromosome 3 are attached together (the black line) and two  
823 microchromosomes (mi6 and mi10) resulted from a single scaffold were showed separately and in size order with the  
824 rest of the microchromosomes.

825

826 Figure 3. Synteny between *P. platyrhinos* and 12 reptilian taxa: three snakes (*N. naja*, *T. elegance*, and *C. viridis*),  
827 five lizards (*A. carolinensis*, *L. agilis*, *Z. vivipara*, *P. muralis*, and *S. merianae*), three turtles (*T. scripta*, *G. evgoodei*,  
828 and *D. coriacea*), and a bird (*G. gallus*). The cladogram shows the phylogenetic relationships among the sampled  
829 taxa [80] (two scaffolds for macrochromosome 3 (3a and 3b) are concatenated in this figure).

830

831 Figure 4. Effective number of chromosomes (C) assessed using the dominance analysis. Values close to 1 represent  
832 full dominance (homologies from a given *P. platyrhinos* chromosome are contained within a single  
833 chromosome/scaffold of another species). Values higher than 1 mean a spread of homologies across multiple  
834 chromosomes/scaffolds.

835

836 Figure 5. Summary of the effective number of chromosomes of *P. platyrhinos* in comparison with the 12 target  
837 species based on SR a) Mean and SD of SR for each chromosome among 12 species. Values close to 1 represent  
838 full dominance (homologies from a given *P. platyrhinos* chromosome are contained within a single  
839 chromosome/scaffold). Values higher than 1 mean a spread of homologies across multiple chromosomes/scaffolds.  
840 b) Cumulative SR for chromosomes of 12 reptilian species. The total amount of SR at greater phylogenetic distances,

841 is higher (cumulative SR ~ 30 in turtles) and showing greater rearrangements and partitions of syntenic blocks in  
842 macrochromosomes than in microchromosomes

843

844 Figure 6. Synteny between *P. platyrhinos* potential microchromosomes (before assigning scaffolds to specific  
845 chromosomes) and the 12 reptilian genomes. The cladogram shows the phylogenetic relationships among the  
846 assessed taxa [80].

847

848 Figure S1: Repeat elements, GC content, and gene density calculated in 1Mb windows for each chromosome of *P.*  
849 *platyrhinos* (two scaffolds for macrochromosome 3 are concatenated).

850

851 Figure S2: Proportion of identified gene IDs from protein-coding annotation to unidentified gene IDs by PANTHER a)  
852 across the chromosomes (Ma stands for macrochromosome, and mi stands for microchromosome). b) between two  
853 groups of chromosomes (Macros = macrochromosomes, and Micros = microchromosomes).

854

855 Figure S2. Investigating potential misassembled point on a final scaffold. a) Chicago scaffolds assembled to a final  
856 scaffold "Sc4326\_4427" were used to investigate a possible misassembled point. b) repeat elements, GC content,  
857 and gene density calculated in 1Mb windows were used as evidence to find break point on this final scaffold. Outlined  
858 cells are where the breakpoint was placed. Then microchromosomes were numbered based on size so these two  
859 scaffolds were numbered as microchromosome 10 (left portion) and microchromosome 6 (right portion).

860

861 Figure S4: Distribution of *P. platyrhinos* total annotated protein coding genes with identified IDs in PANTHER database.  
862 Among 164 PANTHER pathways assigned to *P. platyrhinos* protein coding genes, each pathway accounts for different  
863 number of genes (2 < genes per pathway < 759) that may belong to a specific chromosome (24 pathways only on  
864 macrochromosomes, and 3 only on microchromosomes) or group of chromosomes (13 pathways only in  
865 macrochromosomes group).

866



## 867 TABLES

868 Table 1. Basic information about the *P. platyrhinos* genome assembly.

| Assembly                   | Chicago Assembly | Chicago + Hi-C Assembly |
|----------------------------|------------------|-------------------------|
| Longest Scaffold (bp)      | 361,415,485      | 396,190,715             |
| Number of Scaffolds        | 5,458            | 5,294                   |
| Number of Scaffolds > 1 kb | 5,458            | 5,294                   |
| Contig N50 (kb)            | 12.04            | 12.04                   |
| Scaffold N50 (kb)          | 63,431           | 273,213                 |
| Number of Gaps             | 258,150          | 258,317                 |
| Percent of Genome in Gaps  | 1.54%            | 1.54%                   |

869

870 Table 2: BUSCO summary results.

| BUSCO benchmark             | Number | Percentage |
|-----------------------------|--------|------------|
| <b>Present BUSCOs</b>       | 4,324  | 81.5%      |
| Complete BUSCOs             | 3640   | 68.6%      |
| Complete single-copy BUSCOs | 3609   | 68.0%      |
| Complete duplicated BUSCOs  | 31     | 0.6%       |
| Fragmented BUSCOs           | 684    | 12.9%      |
| <b>Missing BUSCOs</b>       | 986    | 18.5%      |
| Total BUSCO groups searched | 5310   | 100        |

871

872

873 Table 3. Sequencing libraries used for the genome assembly of *P. platyrhinos*.

| Library                    | Read Type  | Number of Reads | Assembly Version | NCBI accession number |
|----------------------------|------------|-----------------|------------------|-----------------------|
| Shotgun library 1 (150 bp) | paired end | 311,540,000     | Primary          | SRR16071941           |
| Shotgun library 2 (150 bp) | paired end | 239,630,000     | Primary          | SRR16071940           |
| Shotgun library 3 (150 bp) | paired end | 308,750,000     | Primary          | SRR16071939           |
| Chicago library 1 (151 bp) | paired end | 402,000,000     | Intermediate     | SRR13811242           |
| Chicago library 2 (151 bp) | paired end | 398,000,000     | Intermediate     | SRR13811241           |
| Chicago library 3 (151 bp) | paired end | 256,000,000     | Intermediate     | SRR13811240           |
| Hi-C library 1 (151 bp)    | paired end | 332,000,000     | Final            | SRR13811239           |
| Hi-C library 2 (151 bp)    | paired end | 374,000,000     | Final            | SRR13811238           |
| Hi-C library 3 (151 bp)    | paired end | 324,000,000     | Final            | SRR13811237           |

874

875 Table 4. Number of reads obtained from 8 tissues of *P. platyrhinos*, used for transcriptome assembly.

| Sample ID    | Tissue  | Raw Reads  | Quality Trimmed Reads | NCBI accession number |
|--------------|---------|------------|-----------------------|-----------------------|
| TRO180600001 | liver   | 49,736,350 | 47,699,266            | SRR13326553           |
| TRO180600002 | lungs   | 40,643,066 | 39,124,052            | SRR13326552           |
| TRO180600003 | brain   | 85,097,044 | 81,754,486            | SRR13326551           |
| TRO180600004 | muscle  | 37,712,026 | 34,653,428            | SRR13326550           |
| TRO180600005 | testes  | 62,536,762 | 58,283,654            | SRR13326549           |
| TRO180600006 | heart   | 34,757,154 | 32,027,338            | SRR13326548           |
| TRO180600007 | eyes    | 46,140,488 | 42,334,272            | SRR13326547           |
| TRO180600008 | kidneys | 41,776,926 | 38,635,176            | SRR13326546           |

876

877 Table S1. The corresponding scaffolds (first column) for each chromosome of *P. platyrhinos* (second column) and  
 878 scaffold length (third column) in base pairs. \*This scaffold was broken down into two microchromosomes (6 and 10).

| Scaffold name | Chromosome(s) name  | length (in base pairs) |
|---------------|---------------------|------------------------|
| Sc3291_377    | Chromosome 1        | 396,190,715            |
| Sc439_455     | Chromosome 2        | 336,734,411            |
| Sc1234_1274   | Chromosome 3-a      | 178,616,284            |
| Sc1882_1940   | Chromosome 3-b      | 123,146,639            |
| Sc5292_5410   | Chromosome 4        | 273,212,746            |
| Sc5293_5450   | Chromosome 5        | 219,432,639            |
| Sc521_540     | Chromosome 6        | 129,273,435            |
| Sc3285_3371   | Microchromosome 1   | 31,685,405             |
| Sc3778_3872   | Microchromosome 2   | 28,086,253             |
| Sc415_430     | Microchromosome 3   | 27,277,973             |
| Sc35_37       | Microchromosome 4   | 27,087,043             |
| Sc3441_3531   | Microchromosome 5   | 26,097,904             |
| Sc4326_4427*  |                     |                        |
| Sc4326a4427   | Microchromosome 10  | 11,894,615             |
| Sc4326b4427   | microchromosome 6   | 23,702,528             |
| Sc26_27       | Microchromosome 7   | 20,466,995             |
| Sc5294_5452   | Microchromosome 8   | 16,009,790             |
| Sc1213_1253   | Microchromosome 9/X | 15,721,303             |
| Sc953_986     | Microchromosome 11  | 8,897,685              |

879

880 Table S2. Best blast hits of cDNA [29] and \* indicates sex linked markers [30] from *A. carolinensis* and *L.*  
 881 *reevesii* against the genome of *P. platyrhinos*.

| Marker   | Accession    | Chromosomal location   |                    |                       | E-value   |
|----------|--------------|------------------------|--------------------|-----------------------|-----------|
|          |              | <i>A. carolinensis</i> | <i>L. reevesii</i> | <i>P. platyrhinos</i> |           |
| DYNC1H1  | AB490348     |                        | 1q                 | Chr1                  | 2.95E-179 |
| ESR1     | AB490345     |                        | 1p                 | Chr1                  | 1.02E-113 |
| WT1      | XM_016992885 | 1                      |                    | Chr1                  | 2.19E-158 |
| WT1      | AB490347     |                        | 1q                 | Chr1                  | 7.53E-80  |
| XAB1     | AB490344     |                        | 1p                 | Chr1                  | 2.31E-35  |
| CHD1     | XM_008103079 | 2                      |                    | Chr2                  | 0         |
| CHD1     | AB480289     |                        | 2p                 | Chr2                  | 1.25E-144 |
| DMRT1    | XM_003216553 | 2                      |                    | Chr2                  | 0         |
| DMRT1    | AB480288     |                        | 2p                 | Chr2                  | 2.15E-64  |
| GHR      | XM_008102837 | 2                      |                    | Chr2                  | 0         |
| GHR      | AB480290     |                        | 2p                 | Chr2                  | 1.01E-104 |
| RPS6     | XM_003216606 | 2                      |                    | Chr2                  | 5.32E-123 |
| RPS6     | AB480287     |                        | 2p                 | Chr2                  | 2.39E-88  |
| RUFY1    | XM_008104854 | 2                      |                    | Chr2                  | 0         |
| RUFY1    | AB490352     |                        | 2q                 | Chr2                  | 3.45E-22  |
| EIF2S3   | XM_003218845 | 3                      |                    | Chr3-a                | 0         |
| EIF2S3   | AB490361     |                        | 3q                 | Chr3-a                | 5.58E-104 |
| OCA2     | XM_008107106 | 3                      |                    | Chr3-a                | 0         |
| OCA2     | AB490360     |                        | 3q                 | Chr3-a                | 1.78E-89  |
| SH3PXD2A | XM_016992171 | 3                      |                    | Chr3-b                | 0         |
| SH3PXD2A | AB490356     |                        | 3p                 | Chr3-b                | 5.98E-166 |
| TLOC1    | AB490355     | 3p                     |                    | Chr3-b                | 1.71E-79  |
| HDAC3    | XM_003219886 | 4                      |                    | Chr4                  | 0         |
| HDAC3    | AB490365     |                        | 4p                 | Chr4                  | 4.16E-97  |
| RBM12    | XM_008109953 | 4                      |                    | Chr4                  | 0         |
| RBM12    | AB490367     |                        | 4q                 | Chr4                  | 3.92E-137 |

|           |                |   |             |             |           |
|-----------|----------------|---|-------------|-------------|-----------|
| SS18      | XM_003219645   | 4 |             | Chr4        | 0         |
| SS18      | AB490397       |   | 4p          | Chr4        | 1.75E-70  |
| ZNF326    | XM_008109275   | 4 |             | Chr4        | 0         |
| ZNF326    | AB490366       |   | 4q          | Chr4        | 1.00E-128 |
| ACSL1     | XM_008111814   | 5 |             | Chr5        | 0         |
| ACSL1     | AB490370       |   | 5p          | Chr5        | 1.00E-95  |
| DCLK2     | XM_008111991   | 5 |             | Chr5        | 0         |
| DCLK2     | AB490369       |   | 5p          | Chr5        | 2.06E-73  |
| EXOC1     | XM_008111693   | 5 |             | Chr5        | 0         |
| EXOC1     | AB490371       |   | 5p          | Chr5        | 3.08E-176 |
| RANGAP1   | XM_008110743   | 5 |             | Chr5        | 0         |
| RANGAP1   | AB490374       |   | 5q          | Chr5        | 6.70E-80  |
| SOX5      | XM_008110345   | 5 |             | Chr5        | 0         |
| SOX5      | AB490376       |   | 5q          | Chr5        | 1.78E-104 |
| UCHL1     | XM_003221541   | 5 |             | Chr5        | 2.55E-63  |
| UCHL1     | AB490372       |   | 5p          | Chr5        | 3.46E-59  |
| CTNNB1    | AB490379       |   | 6q          | Chr6        | 0         |
| GAD2      | XM_003222133   | 6 |             | Chr6        | 0         |
| GAD2      | AB490380       |   | 6q          | Chr6        | 1.98E-76  |
| MYST2     | AB490378       |   | 6p          | Chr6        | 0         |
| WAC       | XM_008112381   | 6 |             | Chr6        | 0         |
| WAC       | AB490381       |   | 6q          | Chr6        | 3.60E-159 |
| AR        | AB490385       |   | micro       | microchr3   | 2.72E-152 |
| TMEM132D* | XM_008113640.2 |   | micro "b"/X | microchr9/X | 0         |
| FZD10*    | XM_003222753.3 |   | micro "b"/X | microchr9/X | 0         |
| ATP2A2*   | XM_008113715   |   | micro "b"/X | microchr9/X | 0         |
| ATP2A2    | AB490391       |   | micro       | microchr9/X | 4.05E-167 |
| ATRX      | AB490386       |   | micro       | microchr3   | 7.88E-127 |
| BRD7      | AB490390       |   | micro       | microchr2   | 3.95E-68  |
| HSPA8     | XM_003222794   |   | micro "a"   | Chr1        | 0         |
| HSPA8     | AB490395       |   | micro       | microchr4   | 3.70E-162 |

883 Table S3. Number, length, and percentage of annotated repeat elements identified.

| Families of repeat elements       | Numbers of elements | Length masked (bp) | % of sequence | % element masked |
|-----------------------------------|---------------------|--------------------|---------------|------------------|
| <b>Retroelements</b>              | 2,082,017           | 451,287,018        | 23.83         | 20.37            |
| <b>SINEs</b>                      | 648,720             | 89,280,596         | 4.72          | 6.35             |
| Penelope                          | 254,722             | 35,799,757         | 1.89          | 2.50             |
| <b>LINEs</b>                      | 1,311,944           | 319,965,632        | 16.90         | 12.84            |
| L2/CR1/Rex                        | 702,907             | 160,952,766        | 8.50          | 6.88             |
| R1/LOA/Jockey                     | 36                  | 3,068              | 0.00          | 0.00             |
| R2/R4/NeSL                        | 5,129               | 640,551            | 0.03          | 0.05             |
| RTE/Bov-B                         | 257,696             | 83,172,778         | 4.39          | 2.52             |
| L1/CIN4                           | 87,958              | 38,708,200         | 2.04          | 0.86             |
| <b>LTR elements</b>               | 121,353             | 42,040,790         | 2.22          | 1.19             |
| BEL/Pao                           | 4,074               | 768,559            | 0.04          | 0.04             |
| Ty1/Copia                         | 18,376              | 7,918,963          | 0.42          | 0.18             |
| Gypsy/DIRS1                       | 39,227              | 14,661,509         | 0.77          | 0.38             |
| Retroviral                        | 34,521              | 5,663,234          | 0.30          | 0.34             |
| <b>DNA transposons</b>            | 1,527,111           | 204,435,133        | 10.80         | 14.94            |
| hobo-Activator                    | 610,832             | 73,847,731         | 3.90          | 5.98             |
| Tc1-IS630-Pogo                    | 314,462             | 42,728,561         | 2.26          | 3.08             |
| PiggyBac                          | 1,795               | 445,424            | 0.02          | 0.02             |
| Tourist/Harbinger                 | 500,329             | 78,020,620         | 4.12          | 4.90             |
| <b>Unclassified</b>               | 828,472             | 146,176,330        | 7.72          | 8.11             |
| <b>Total interspersed repeats</b> | 9,351,681           | 801,898,481        | 42.35         | 91.51            |
| Small RNA                         | 33,490              | 3,376,969          | 0.18          | 0.33             |
| Satellites                        | 51,860              | 7,242,936          | 0.38          | 0.51             |
| Simple repeats                    | 705,413             | 27,116,672         | 1.43          | 6.90             |
| Low complexity                    | 77,452              | 3,957,871          | 0.21          | 0.76             |

|                     |            |             |       |        |
|---------------------|------------|-------------|-------|--------|
| <b>Total masked</b> | 10,219,896 | 841,750,763 | 44.45 | 100.00 |
|---------------------|------------|-------------|-------|--------|

884

885 Table S4: Comparison of molecular pathways analysis on macrochromosomes and microchromosomes. Second  
 886 column shows the specific pathways identified on each chromosome. Third column shows the pathways that belong  
 887 to specific group of chromosomes.

| Chromosome location | Specific pathways for each chromosome                                                                               | Specific pathways for macros versus micros                                                                                                                                                                |
|---------------------|---------------------------------------------------------------------------------------------------------------------|-----------------------------------------------------------------------------------------------------------------------------------------------------------------------------------------------------------|
| Chromosome 1        | Allantoin degradation (P02725), Methionine biosynthesis (P02753)                                                    | 5-Hydroxytryptamine biosynthesis (P04371), Acetate utilization (P02722), Activin beta signaling pathway (P06210), Anandamide degradation (P05728),                                                        |
| Chromosome 2        | ALP23B signaling pathway (P06209), GBB signaling pathway (P06214), MYO signaling pathway (P06215)                   | Androgen/estrogene/progesterone biosynthesis (P02727), Ascorbate degradation (P02729), ATP synthesis (P02721), Biotin biosynthesis (P02731),                                                              |
| Chromosome 3        | Cysteine biosynthesis (P02737), Lysine biosynthesis (P02751)                                                        | BMP/activin signaling pathway-drosophila (P06211), DPP signaling pathway (P06213), DPP-SCW signaling pathway (P06212), Glutamine glutamate conversion (P02745), Isoleucine biosynthesis (P02748), Leucine |
| Chromosome 4        | Thiamin metabolism (P02780)                                                                                         | biosynthesis (P02749), Methylmalonyl pathway (P02755), Proline biosynthesis (P02768), Purine                                                                                                              |
| Chromosome 5        | Cobalamin biosynthesis (P02735), Sulfate assimilation (P02778)                                                      | metabolism (P02769), Pyridoxal phosphate salvage pathway (P02770), Pyridoxal-5-phosphate biosynthesis (P02759), SCW signaling pathway (P06216), Succinate                                                 |
| Chromosome 6        | Carnitine metabolism (P02733), Coenzyme A linked carnitine metabolism (P02732), and Threonine biosynthesis (P02781) | to proprionate conversion (P02777), Toll pathway-drosophila (P06217), Valine biosynthesis (P02785), and Vitamin B6 metabolism (P02787)                                                                    |
| Microchromosome 1   | None.                                                                                                               | None.                                                                                                                                                                                                     |
| Microchromosome 2   | Tyrosine biosynthesis (P02784)                                                                                      |                                                                                                                                                                                                           |
| Microchromosome 3   | None.                                                                                                               |                                                                                                                                                                                                           |



---

|                     |                            |
|---------------------|----------------------------|
|                     | Bupropion degradation      |
| Microchromosome 4   | (P05729)                   |
|                     | Triacylglycerol metabolism |
| Microchromosome 5   | (P02782)                   |
| Microchromosome 6   | None.                      |
| Microchromosome 7   | None.                      |
| Microchromosome 8   | None.                      |
| Microchromosome 9/X | None.                      |
| Microchromosome 10  | None.                      |
| Microchromosome 11  | None.                      |

---

888

889

890

891 Table S5. Genome assemblies and number of markers used for *in silico* painting. All assemblies are  
 892 available through NCBI under the appropriate accession.

| Organism               | Potential<br>single<br>markers | Total confirmed (5<br>consecutive)<br>markers | Scaffolds with<br>confirmed<br>homologies | Confirmed<br>markers in<br>Scaffolds (%) | Assembly<br>accession |
|------------------------|--------------------------------|-----------------------------------------------|-------------------------------------------|------------------------------------------|-----------------------|
| <i>A. carolinensis</i> | 2,616,045                      | 87,155                                        | 13                                        | 57,006<br>(65.41)                        | GCA_000090745.2       |
| <i>S. merianae</i>     | 390,847                        | 31,955                                        | 19                                        | 31,805<br>(99.53)                        | GCA_003586115.2       |
| <i>L. agilis</i>       | 755,639                        | 44,200                                        | 20                                        | 44,199<br>(99.99)                        | GCA_009819535.1       |
| <i>P. muralis</i>      | 719,822                        | 46,093                                        | 19                                        | 45,731<br>(99.21)                        | GCA_004329235.1       |
| <i>Z. vivipara</i>     | 751,121                        | 43,371                                        | 19                                        | 42,224<br>(97.35)                        | GCA_011800845.1       |
| <i>C. viridis</i>      | 299,173                        | 18,161                                        | 18                                        | 17,891<br>(98.51)                        | GCA_003400415.2       |
| <i>T. elegans</i>      | 282,458                        | 17,817                                        | 18                                        | 17,725<br>(99.48)                        | GCA_009769535.1       |
| <i>N. naja</i>         | 291,209                        | 19,898                                        | 19                                        | 19,805<br>(99.52)                        | GCA_009733165.1       |
| <i>T. scripta</i>      | 177,241                        | 15,287                                        | 25                                        | 15,252<br>(99.77)                        | GCA_013100865.1       |
| <i>G. evgoodei</i>     | 152,748                        | 14,864                                        | 24                                        | 14,614<br>(98.32)                        | GCA_007399415.1       |
| <i>D. coriacea</i>     | 137,161                        | 14,075                                        | 29                                        | 14,075<br>(100.00)                       | GCA_009764565.3       |
| <i>G. gallus</i>       | 88,397                         | 10,934                                        | 33                                        | 10,934<br>(100.00)                       | GCA_000002315.5       |

893

A phylogenetic tree on the left shows the relationships between the groups. Rhynchocephalia is the outgroup. Sauropsida is a clade containing Squamata, Crocodylia, and Testudines. Aves is a sister clade to Sauropsida. The data table to the right provides chromosome range information for each group.

|                 | Diploid<br>chromosome<br>range | Macro<br>chromosome<br>range | Micro<br>chromosome<br>range |
|-----------------|--------------------------------|------------------------------|------------------------------|
| Rhynchocephalia | 36                             | 28                           | 8                            |
| Squamata        | 20-62                          | 10-38                        | 0-36                         |
| Aves            | 40-126                         | 5-14                         | 16-114                       |
| Crocodylia      | 30-42                          | 30-42                        | 0                            |
| Testudines      | 26-68                          | 10-36                        | 0-56                         |

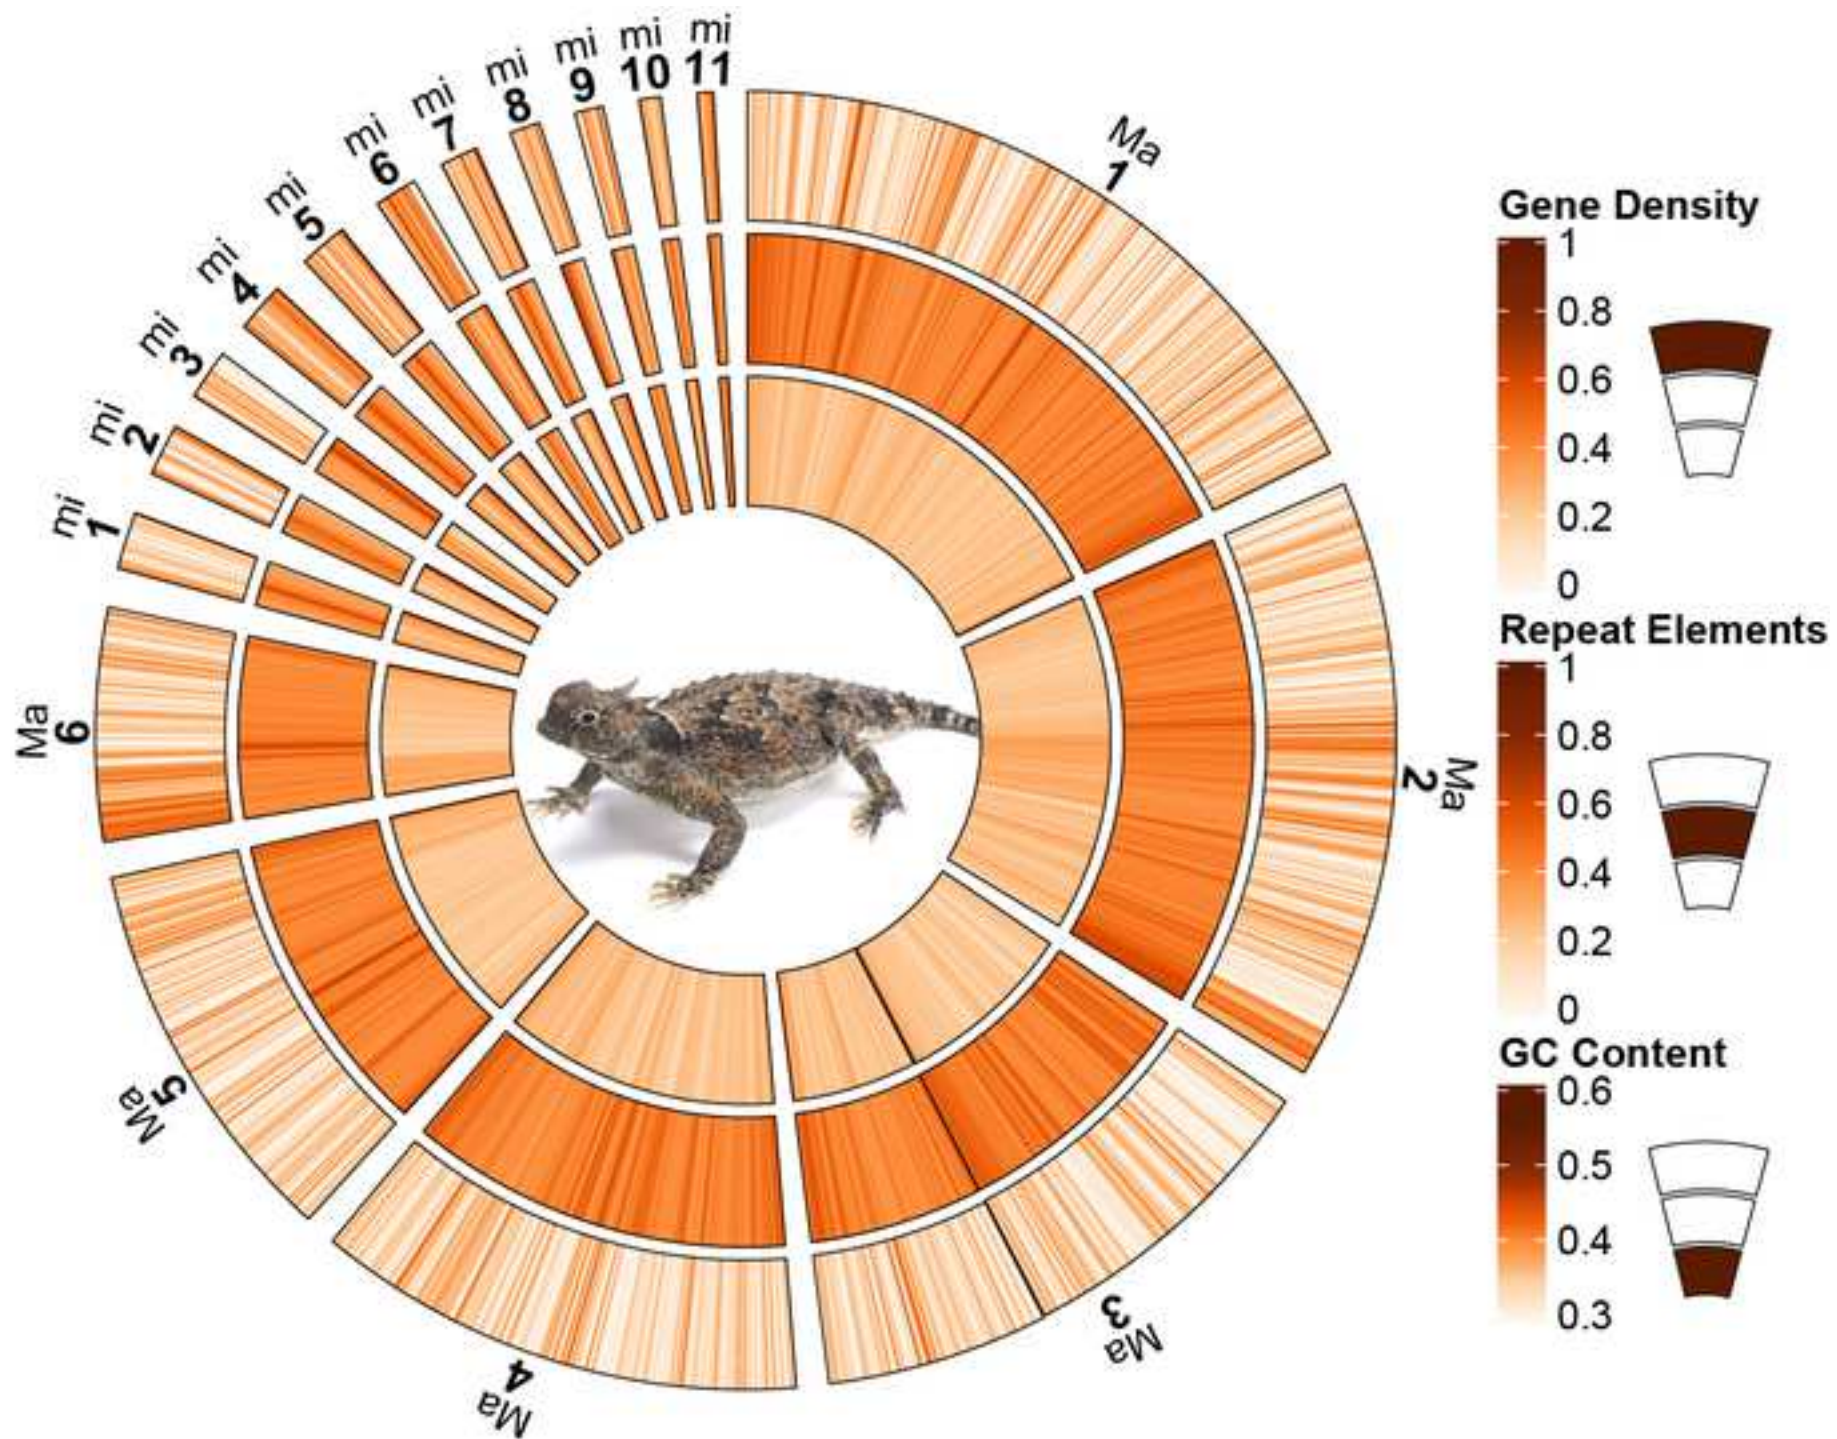

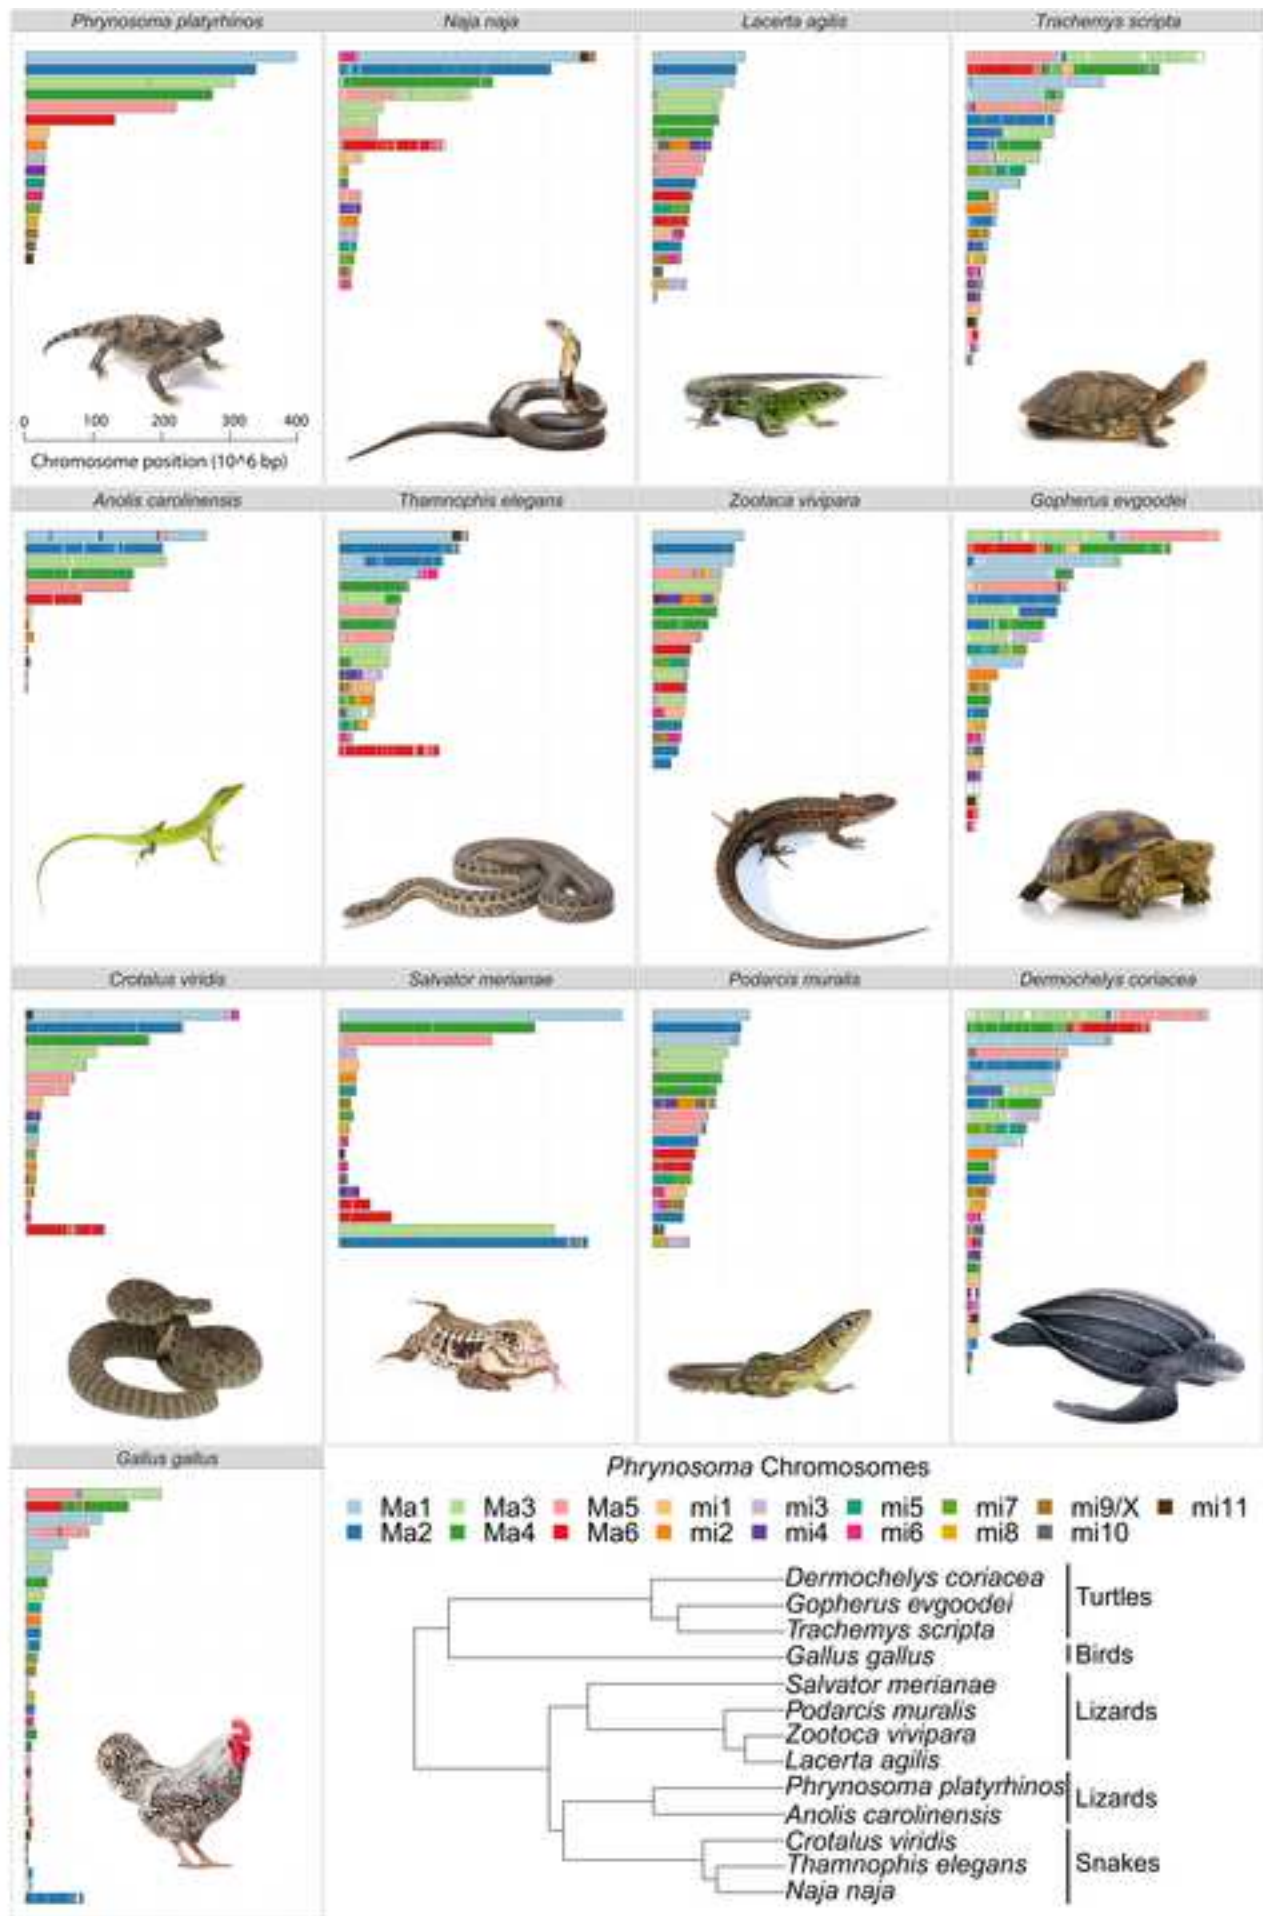



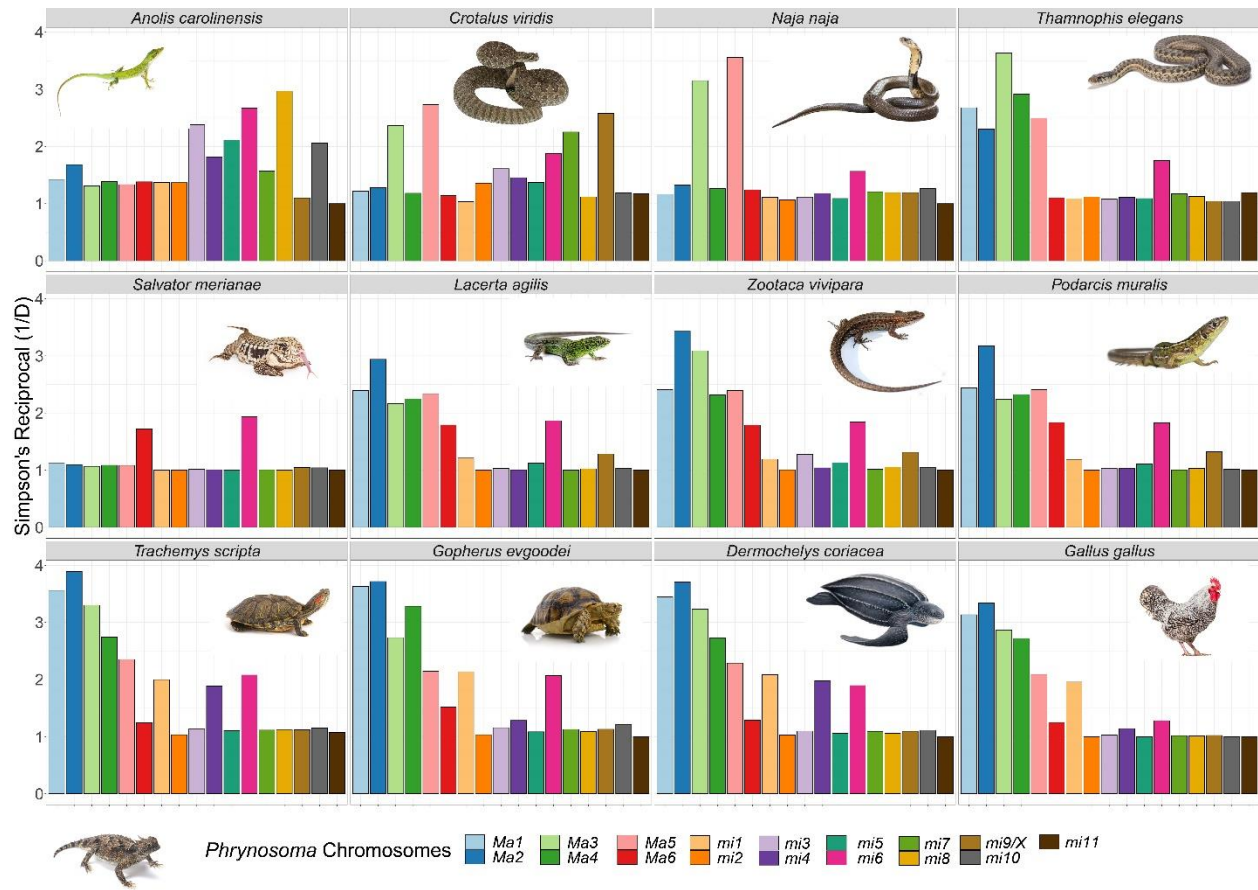

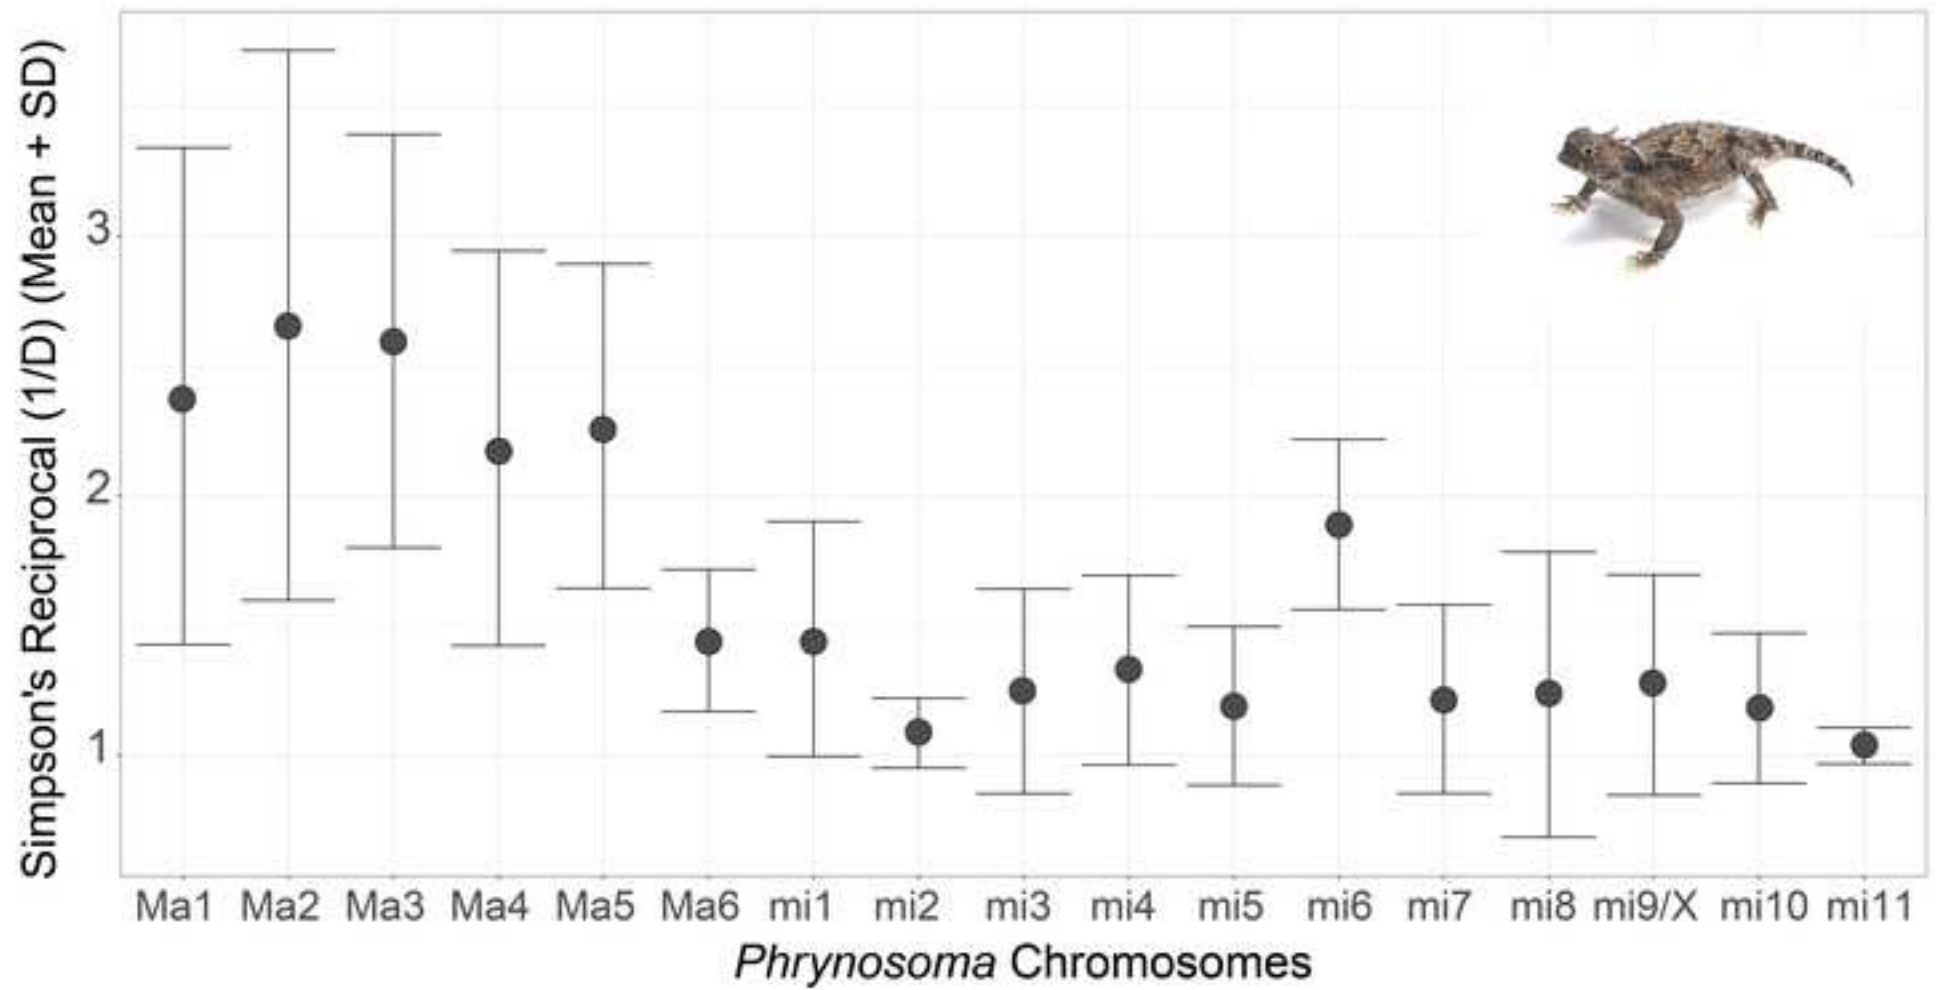

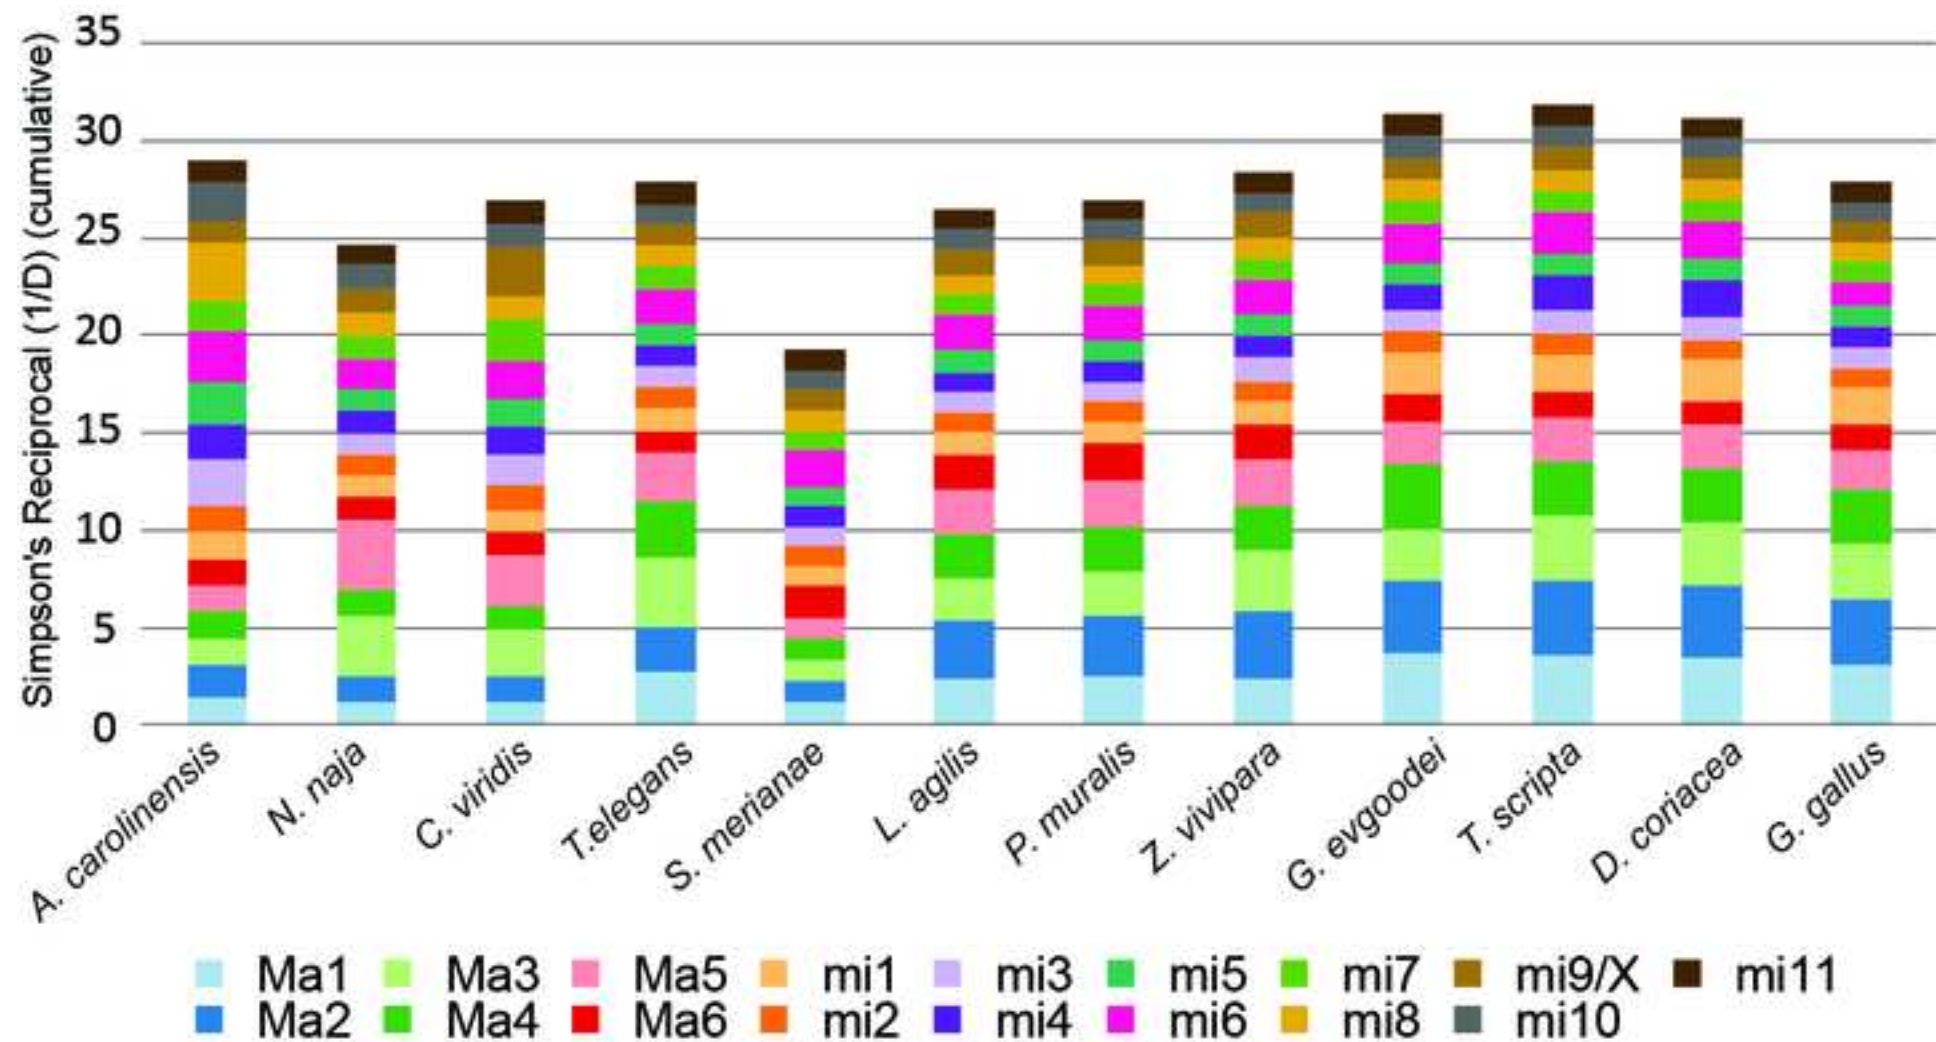



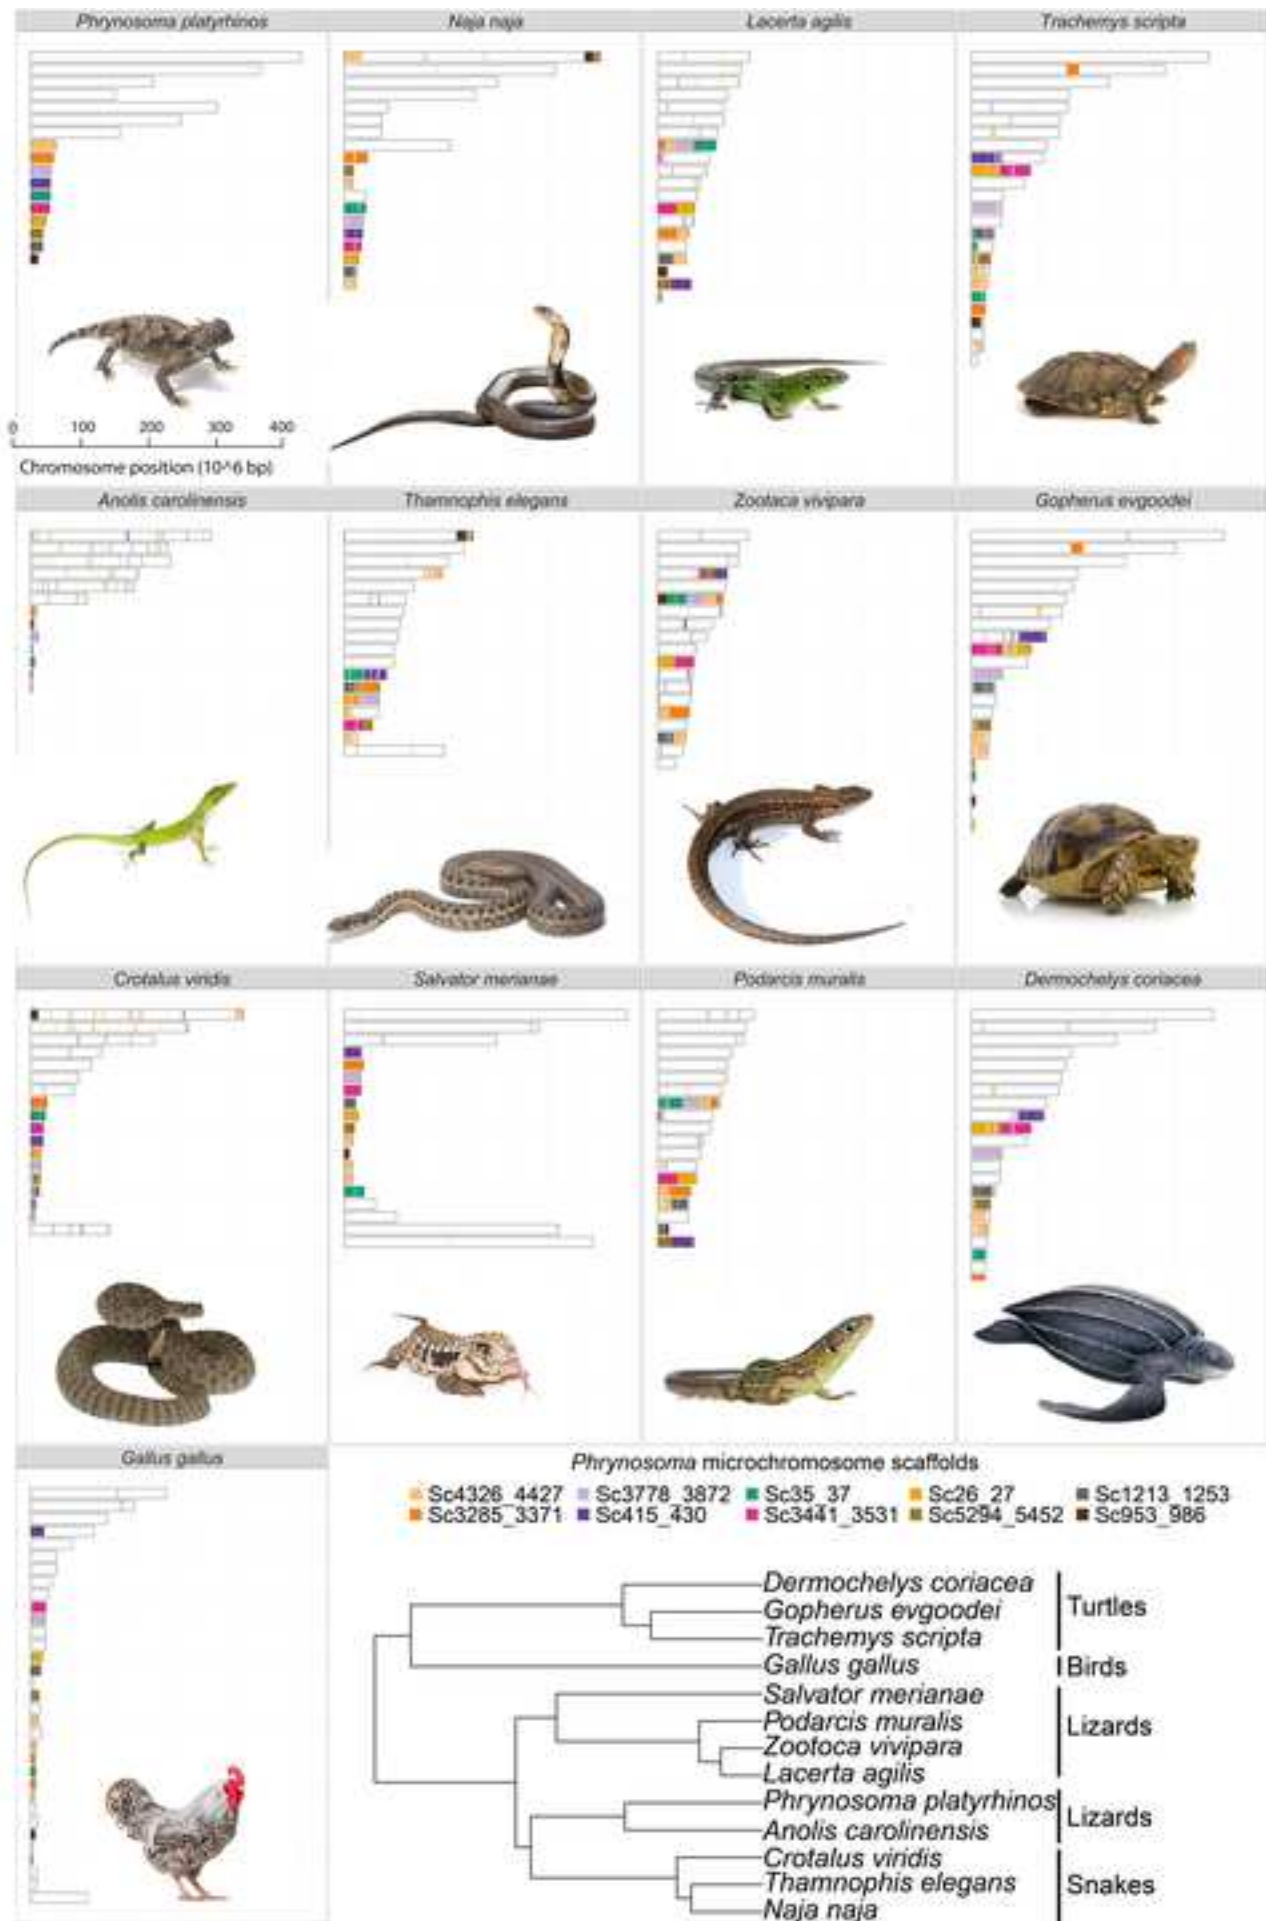

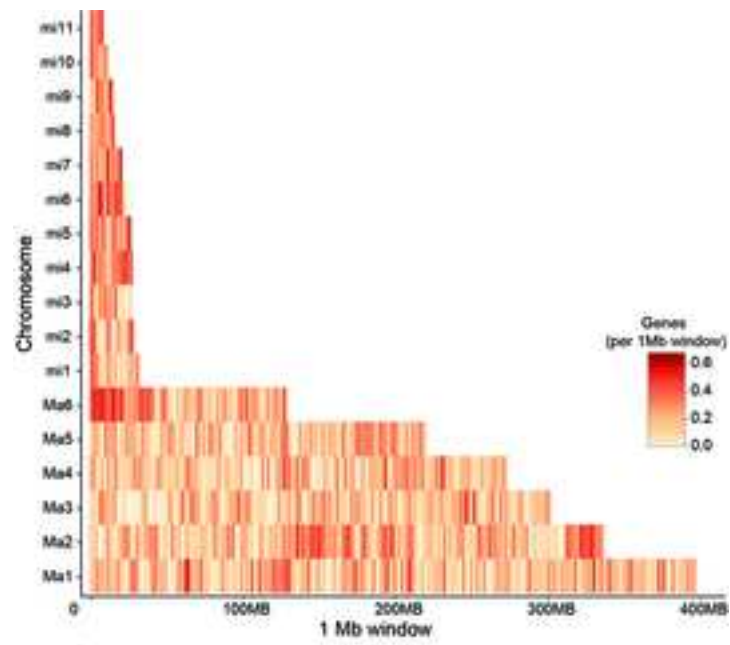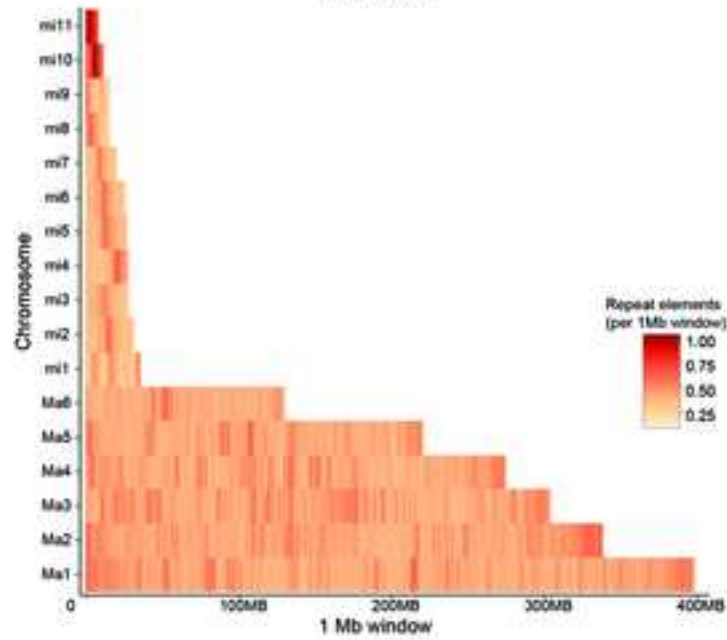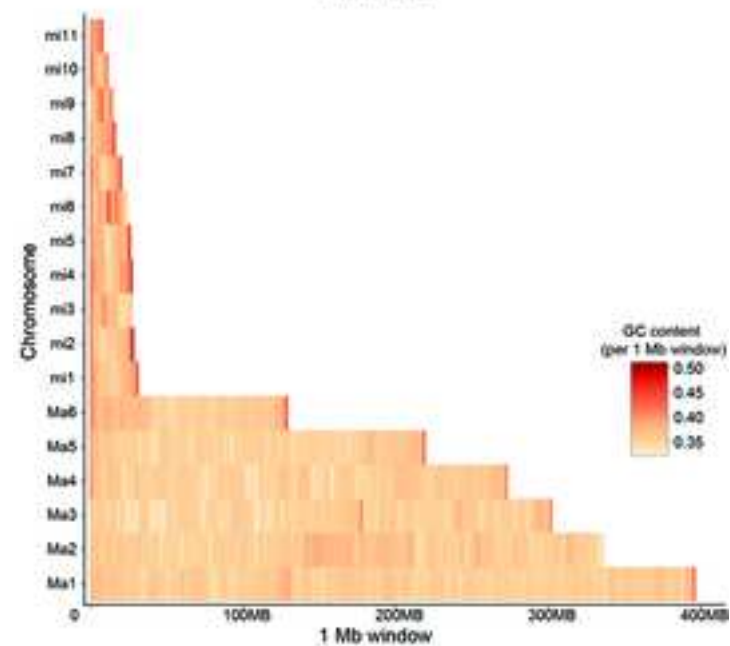

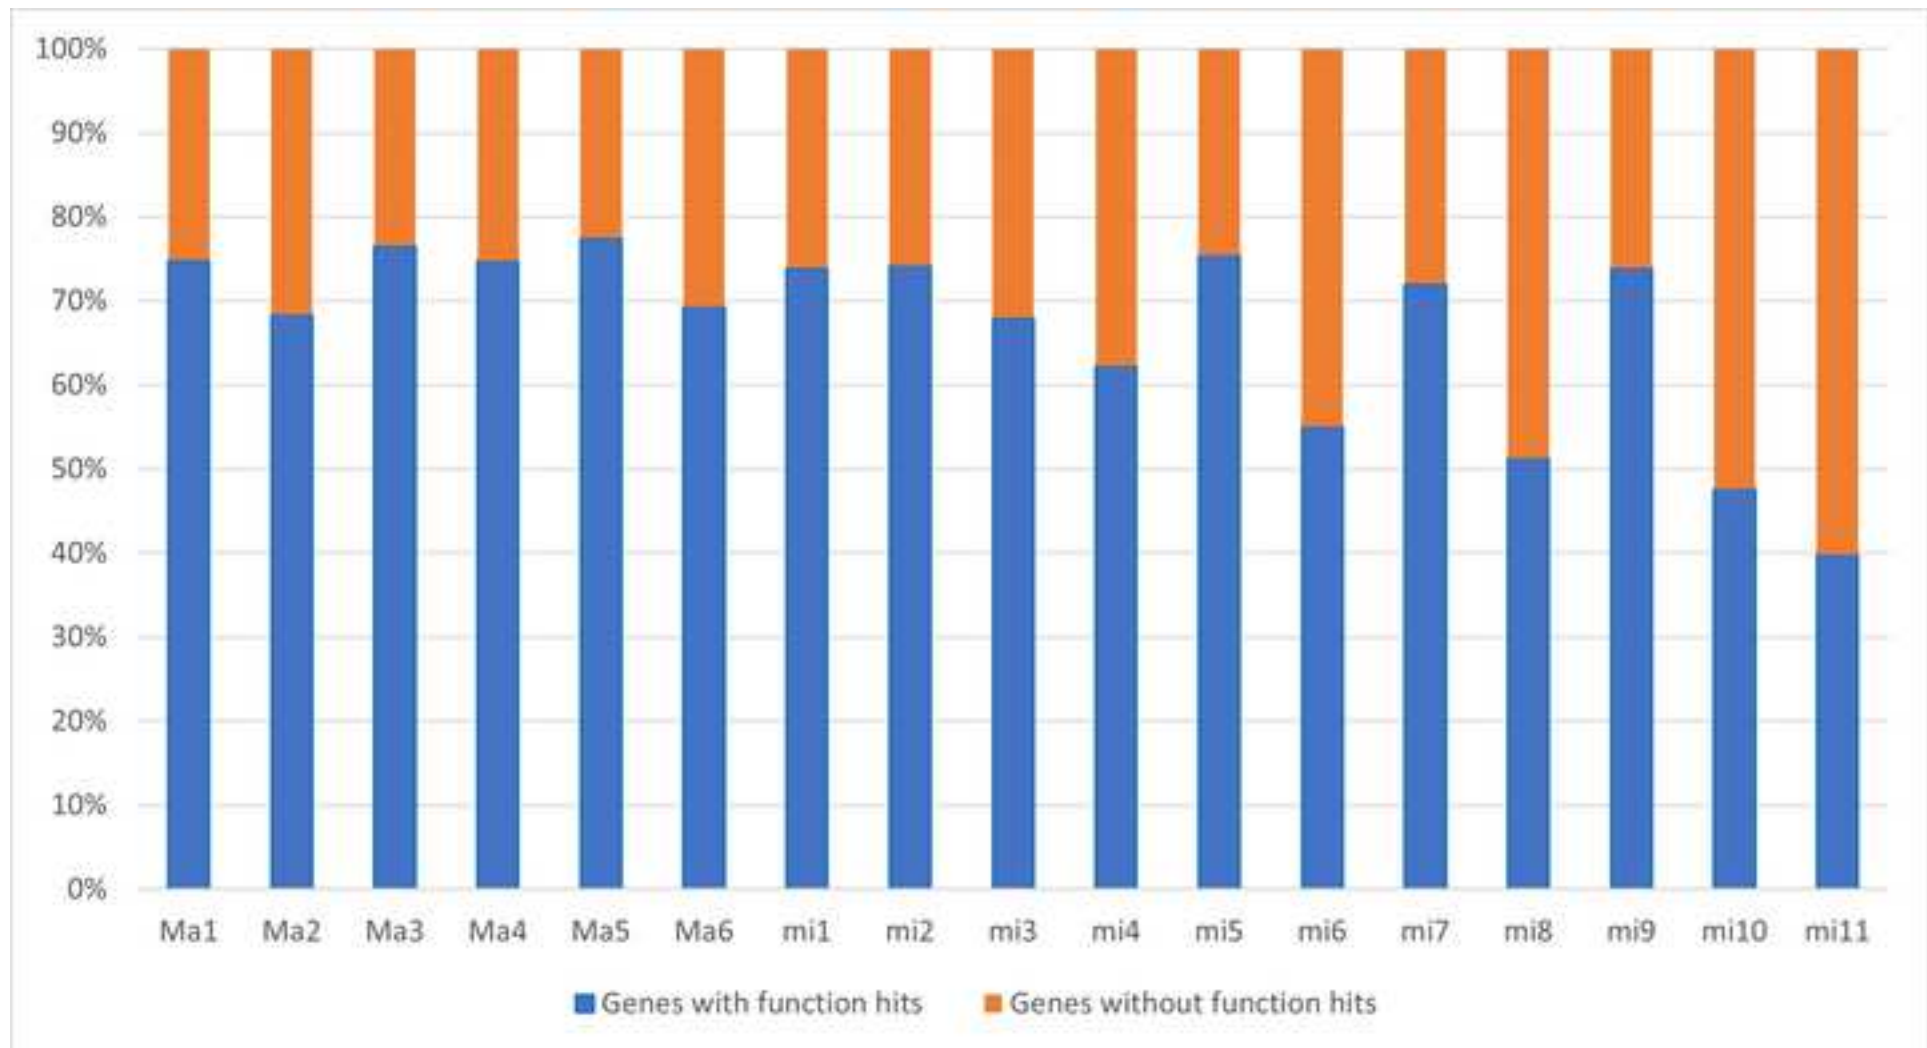

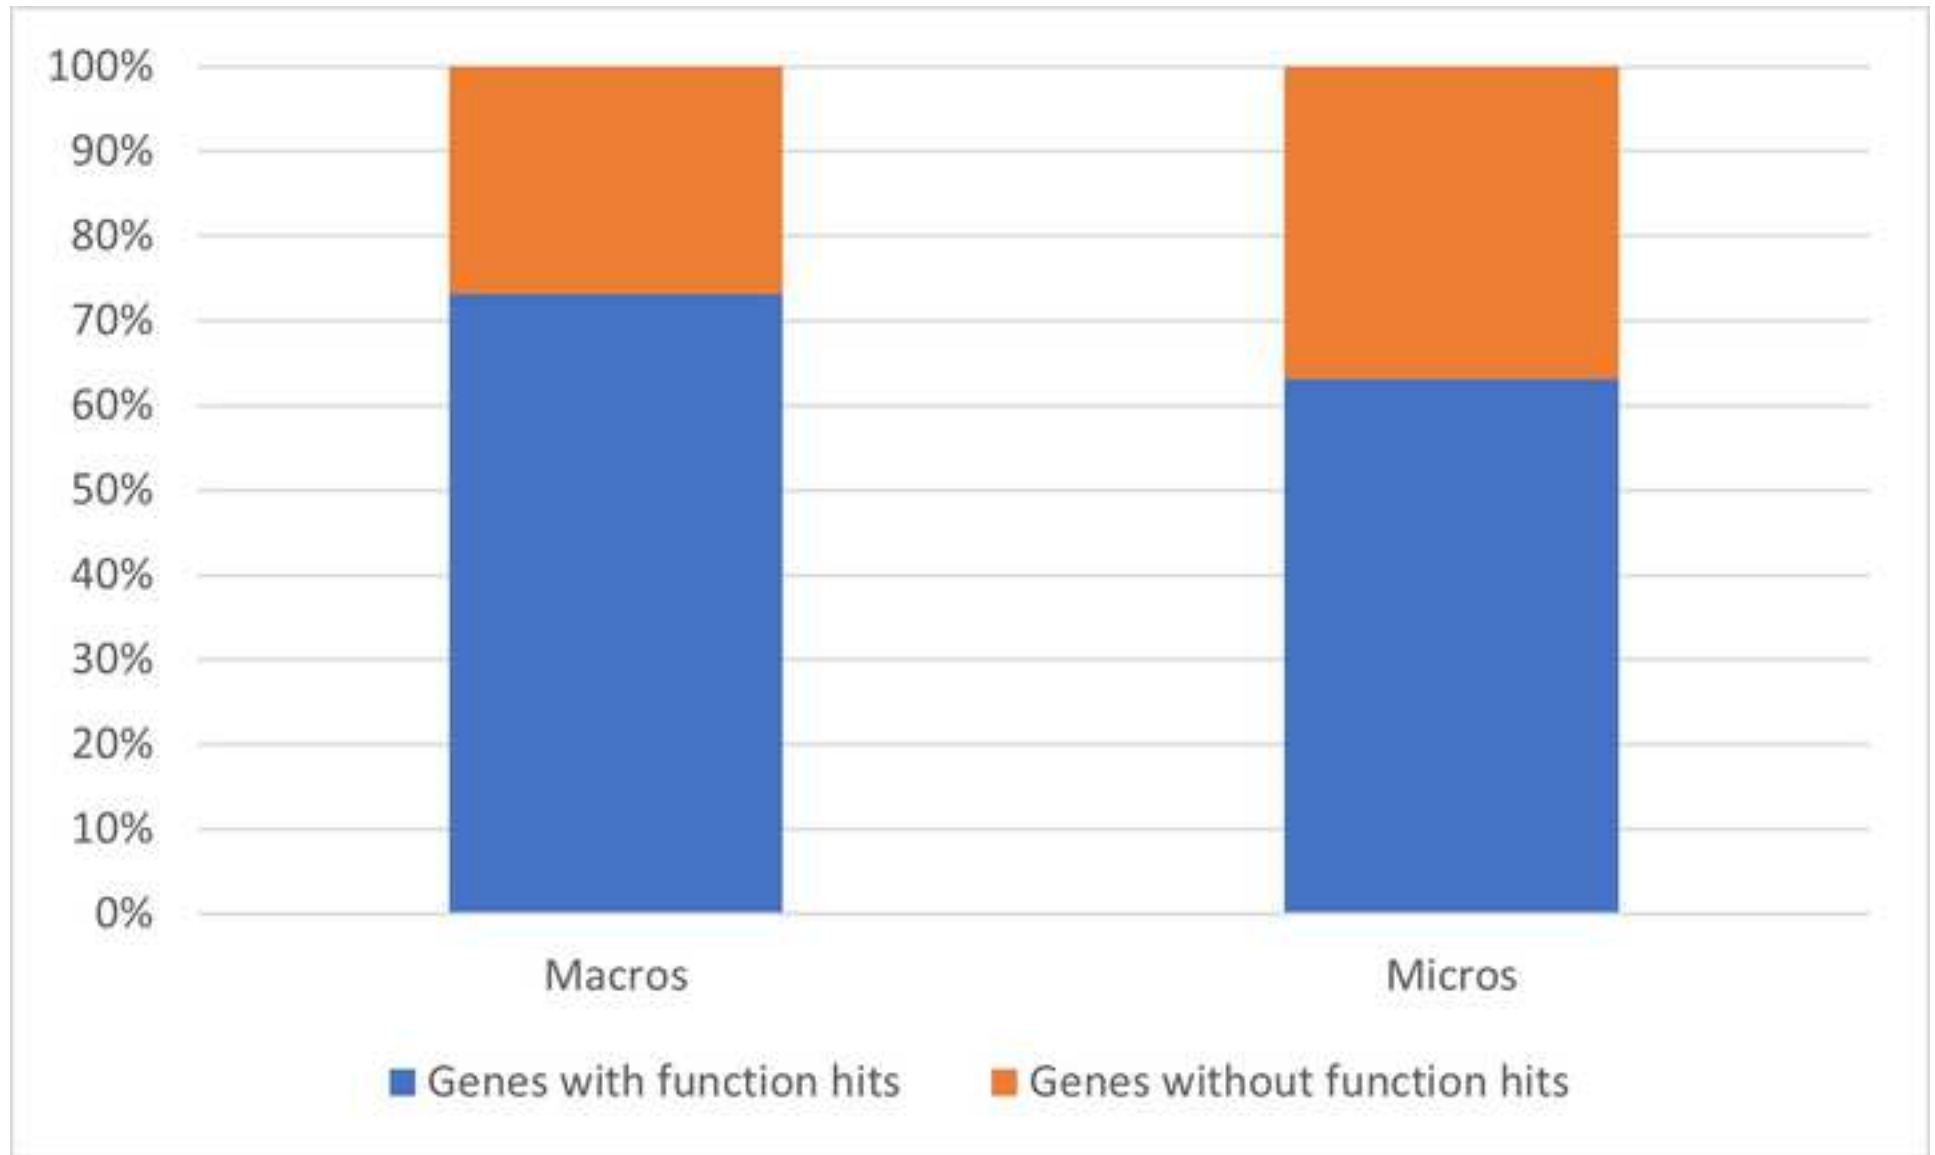

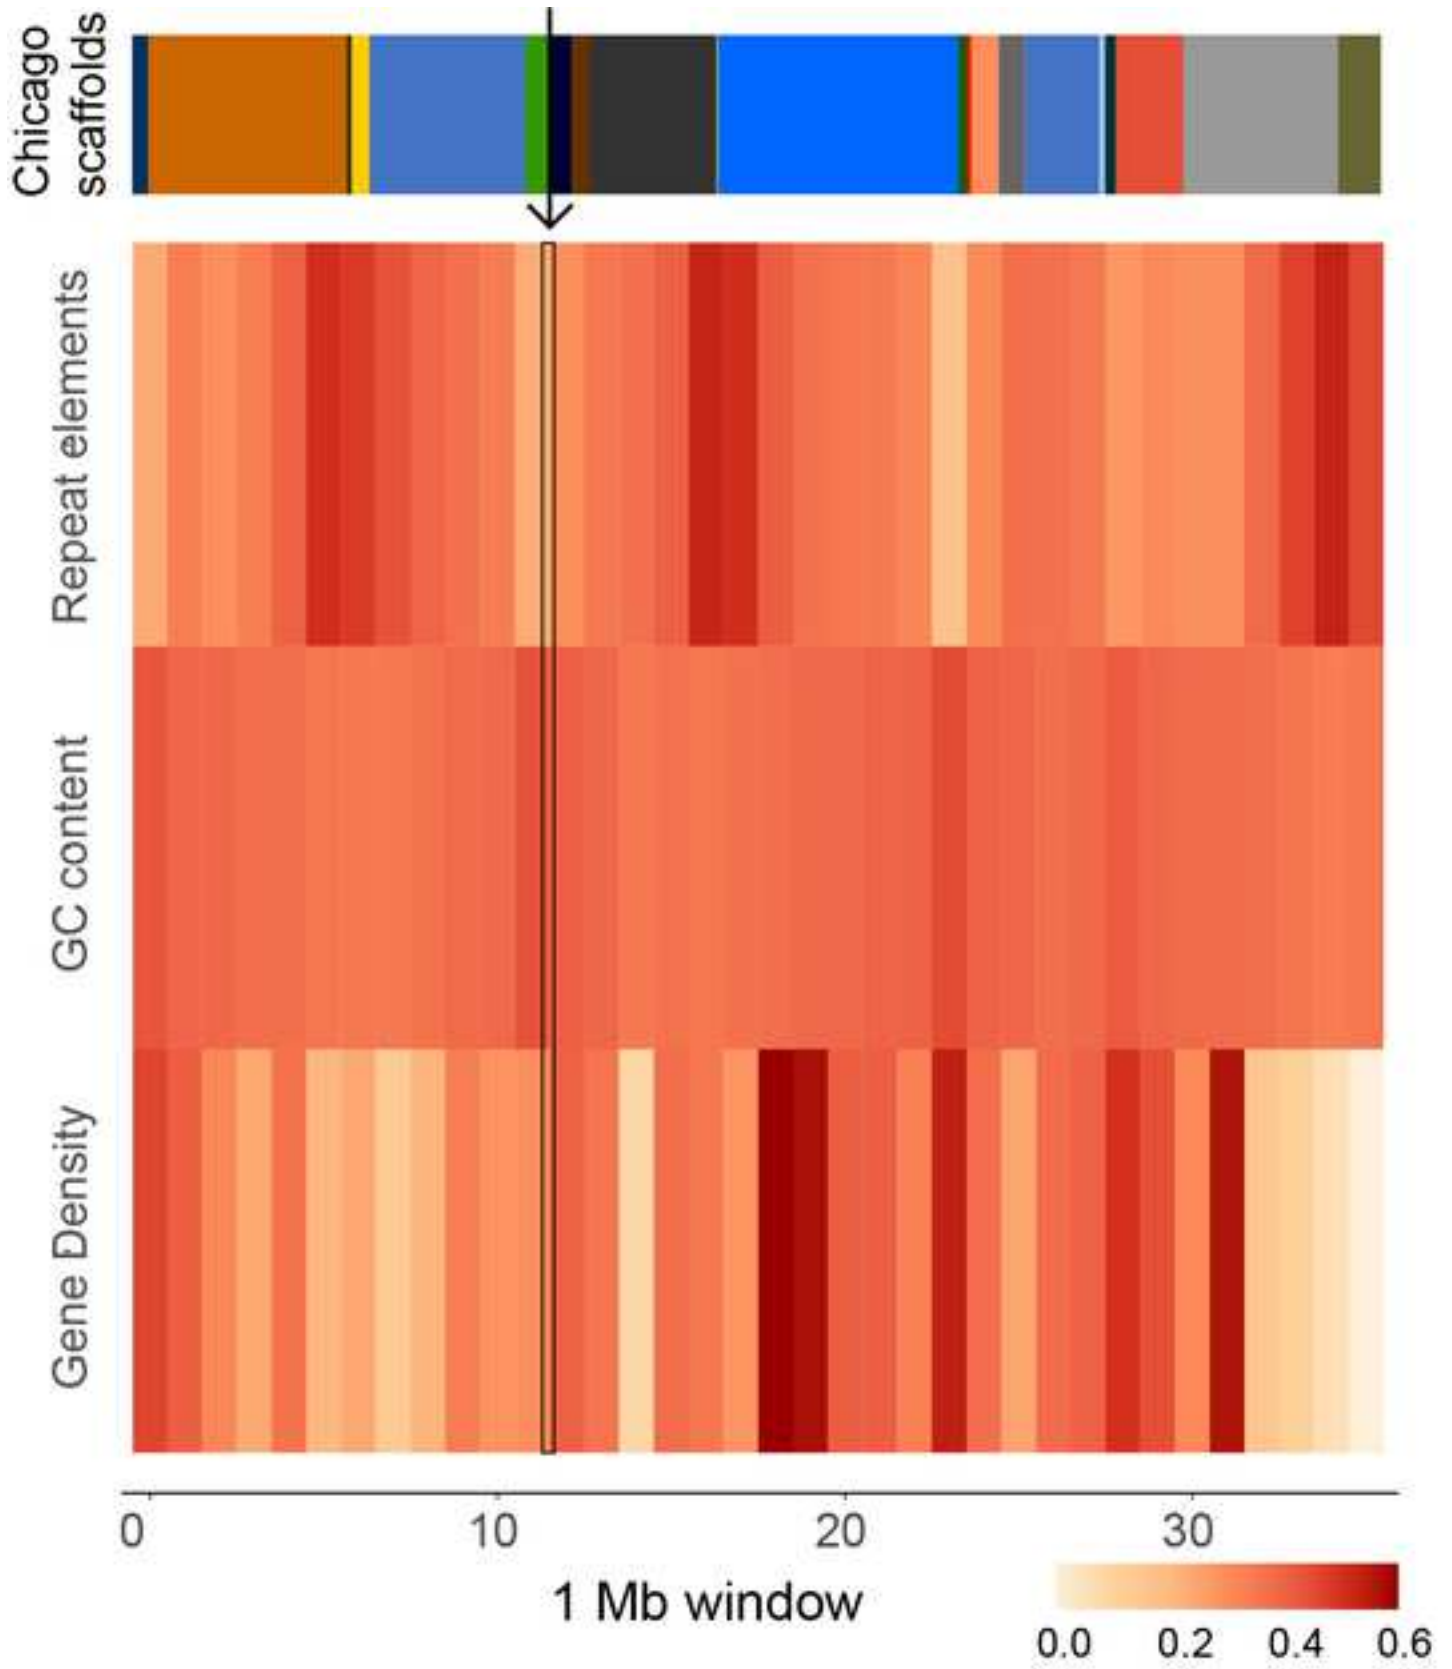

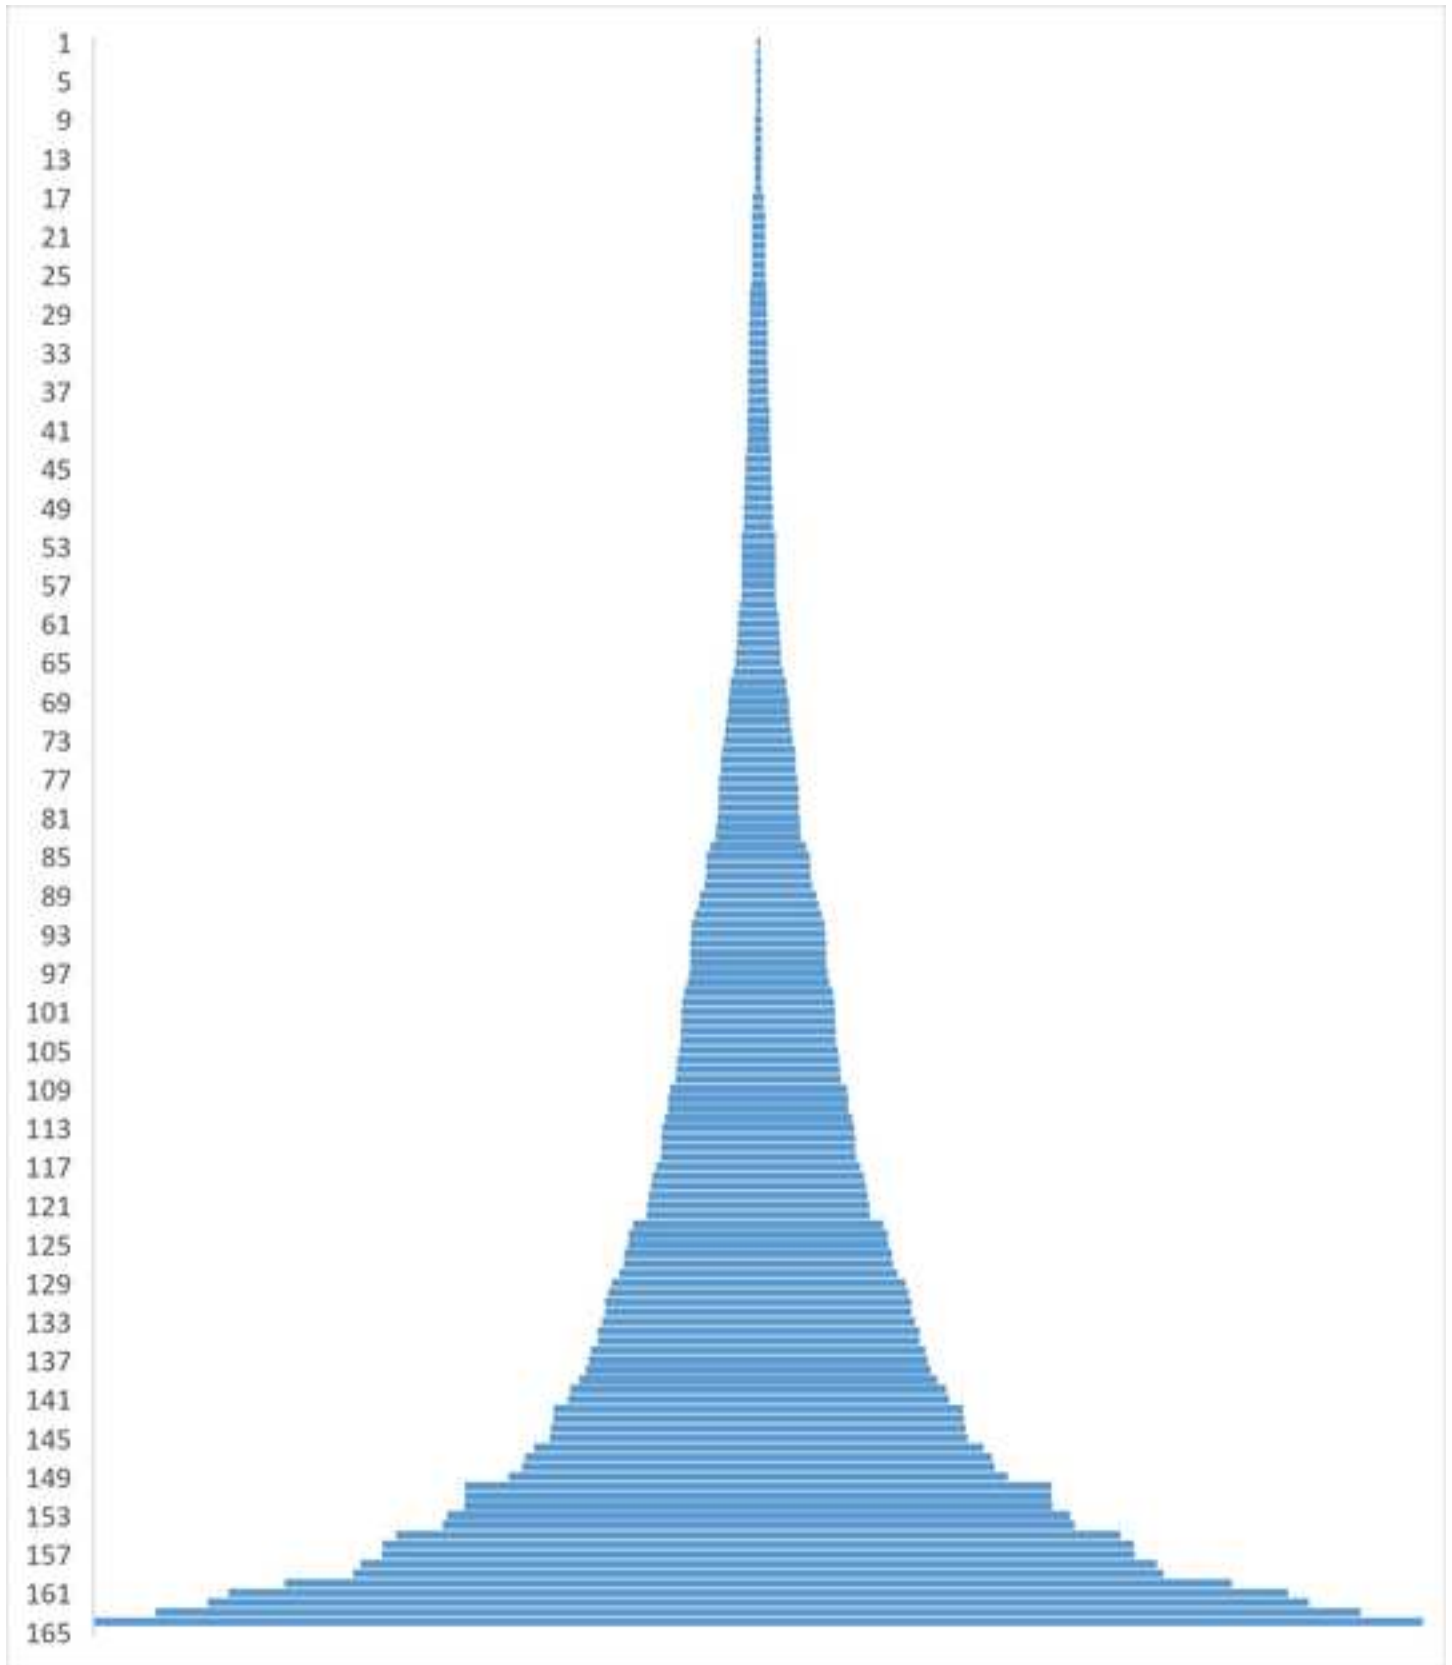

Supplement: giab098_giga-d-21-00044_revision_2.pdf [file giab098_giga-d-21-00044_revision_2.pdf]
